# Supplementary material
Source: PubMed Central journal article supplement (PMC3185174)
Supplement: NIHMS319262-supplement-1_si_001.pdf [file NIHMS319262-supplement-1_si_001.pdf]

**Supplemental Table 1: The chemical compounds with reported subcellular localization site in the endo-lysosomes.**

References information is available in Supplemental Table 10. Structure is presented as the Simplified Molecular Input Line Entry Specification string of the major microspecies at pH 7.4, as calculated by ChemAxon.

|             |                              |
|-------------|------------------------------|
| Name:       | Ammonia                      |
| Method:     | Pharmacological Effect       |
| References: | 1                            |
| Structure:  | [NH4+]                       |
| Name:       | Methylamine                  |
| Method:     | Pharmacological Effect       |
| References: | 1                            |
| Structure:  | C[NH3+]                      |
| Name:       | Dimethylamine                |
| Method:     | Pharmacological Effect       |
| References: | 1                            |
| Structure:  | C[NH2+] <sub>2</sub> C       |
| Name:       | Ethylamine                   |
| Method:     | Pharmacological Effect       |
| References: | 1                            |
| Structure:  | CC[NH3+]                     |
| Name:       | Isopropylamine               |
| Method:     | Pharmacological Effect       |
| References: | 1                            |
| Structure:  | CC(C)[NH3+]                  |
| Name:       | Propylamine                  |
| Method:     | Pharmacological Effect       |
| References: | 1                            |
| Structure:  | CCC[NH3+]                    |
| Name:       | Trimethylamine               |
| Method:     | Pharmacological Effect       |
| References: | 1                            |
| Structure:  | C[NH+](C) <sub>3</sub> C     |
| Name:       | Ethylenediamine              |
| Method:     | Pharmacological Effect       |
| References: | 1                            |
| Structure:  | NCC[NH3+]                    |
| Name:       | Ethanolamine; 2-aminoethanol |
| Method:     | Pharmacological Effect       |
| References: | 1                            |
| Structure:  | [NH3+] <sub>2</sub> CCO      |
| Name:       | Imidazole                    |
| Method:     | Pharmacological Effect       |
| References: | 1, 229                       |
| Structure:  | c1c[nH]cn1                   |
| Name:       | Butylamine                   |
| Method:     | Pharmacological Effect       |
| References: | 1                            |
| Structure:  | CCCC[NH3+]                   |

|             |                             |
|-------------|-----------------------------|
| Name:       | Diethylamine                |
| Method:     | Pharmacological Effect      |
| References: | 1                           |
| Structure:  | CC[NH2+] <sub>2</sub> CC    |
| Name:       | Isobutylamine               |
| Method:     | Pharmacological Effect      |
| References: | 1                           |
| Structure:  | CC(C)C[NH3+]                |
| Name:       | S-butylamine                |
| Method:     | Pharmacological Effect      |
| References: | 1                           |
| Structure:  | CCC(C)[NH3+]                |
| Name:       | T-butylamine                |
| Method:     | Pharmacological Effect      |
| References: | 1                           |
| Structure:  | CC(C)(C)[NH3+]              |
| Name:       | 1,2-Diaminopropane          |
| Method:     | Pharmacological Effect      |
| References: | 1                           |
| Structure:  | CC([NH3+])CN                |
| Name:       | 2-Methylaminoethanol        |
| Method:     | Pharmacological Effect      |
| References: | 1                           |
| Structure:  | C[NH2+] <sub>2</sub> CCO    |
| Name:       | Isopropanolamine            |
| Method:     | Pharmacological Effect      |
| References: | 1                           |
| Structure:  | CC(O)C[NH3+]                |
| Name:       | Pentylamine                 |
| Method:     | Pharmacological Effect      |
| References: | 1                           |
| Structure:  | CCCCC[NH3+]                 |
| Name:       | N,N-Dimethylethylenediamine |
| Method:     | Pharmacological Effect      |
| References: | 1                           |
| Structure:  | CNCC[NH2+] <sub>2</sub> C   |
| Name:       | 2-amino-1-butanol           |
| Method:     | Pharmacological Effect      |
| References: | 1                           |
| Structure:  | CCC([NH3+])CO               |
| Name:       | 2-amino-2-methyl-1-propanol |
| Method:     | Pharmacological Effect      |
| References: | 1                           |
| Structure:  | CC(C)([NH3+])CO             |

|             |                                     |
|-------------|-------------------------------------|
| Name:       | 2-Dimethylaminoethanol              |
| Method:     | Pharmacological Effect              |
| References: | 1                                   |
| Structure:  | <chem>C[NH+](C)CCO</chem>           |
| Name:       | 4-amino-1-butanol                   |
| Method:     | Pharmacological Effect              |
| References: | 1                                   |
| Structure:  | <chem>[NH3+]CCCCO</chem>            |
| Name:       | Hexylamine                          |
| Method:     | Pharmacological Effect              |
| References: | 1                                   |
| Structure:  | <chem>CCCCCC[NH3+]</chem>           |
| Name:       | Triethylamine                       |
| Method:     | Pharmacological Effect              |
| References: | 1                                   |
| Structure:  | <chem>CC[NH+](CC)CC</chem>          |
| Name:       | 3-Dimethylamino-1-propylamine       |
| Method:     | Pharmacological Effect              |
| References: | 1                                   |
| Structure:  | <chem>C[NH+](C)CCC[NH3+]</chem>     |
| Name:       | 3-Dimethylamino-1-propanol          |
| Method:     | Pharmacological Effect              |
| References: | 1                                   |
| Structure:  | <chem>C[NH+](C)CCCO</chem>          |
| Name:       | 2-Amino-2-methyl-1,3-propanediol    |
| Method:     | Pharmacological Effect              |
| References: | 1                                   |
| Structure:  | <chem>CC([NH3+])(CO)CO</chem>       |
| Name:       | beta-Dimethylaminoethylchloride     |
| Method:     | Pharmacological Effect              |
| References: | 1                                   |
| Structure:  | <chem>C[NH+](C)CCCl</chem>          |
| Name:       | N,N-Diethylaminoethylamine          |
| Method:     | Pharmacological Effect              |
| References: | 1                                   |
| Structure:  | <chem>CC[NH+](CC)CCN</chem>         |
| Name:       | 2-(diethylamino)ethanol             |
| Method:     | Pharmacological Effect              |
| References: | 1                                   |
| Structure:  | <chem>CC[NH+](CC)CCO</chem>         |
| Name:       | 2-Dimethylamino-2-methyl-1-propanol |
| Method:     | Pharmacological Effect              |
| References: | 1                                   |
| Structure:  | <chem>C[NH+](C)C(C)(C)CO</chem>     |
| Name:       | N,N-Dimethyl-3-chloropropylamine    |
| Method:     | Pharmacological Effect              |
| References: | 1                                   |
| Structure:  | <chem>C[NH+](C)CCCl</chem>          |

|             |                                                 |
|-------------|-------------------------------------------------|
| Name:       | Dibutylamine                                    |
| Method:     | Pharmacological Effect                          |
| References: | 1                                               |
| Structure:  | <chem>CCCC[NH2+]CCCC</chem>                     |
| Name:       | Triethanolamine                                 |
| Method:     | Pharmacological Effect                          |
| References: | 1                                               |
| Structure:  | <chem>OCC[NH+](CCO)CCO</chem>                   |
| Name:       | Phentermine                                     |
| Method:     | Pharmacological Effect                          |
| References: | 6, 512                                          |
| Structure:  | <chem>CC(C)([NH3+])Cc1cccc1</chem>              |
| Name:       | Chlorphentermine                                |
| Method:     | Pharmacological Effect                          |
| References: | 6, 512                                          |
| Structure:  | <chem>CC(C)([NH3+])Cc1ccc(Cl)cc1</chem>         |
| Name:       | Fenfluramine                                    |
| Method:     | Pharmacological Effect                          |
| References: | 6, 516                                          |
| Structure:  | <chem>CCC(C)([NH3+])Cc1ccc(cc1)C(F)(F)F</chem>  |
| Name:       | Alprenolol                                      |
| Method:     | Uptake/Binding                                  |
| References: | 3                                               |
| Structure:  | <chem>CC(C)[NH2+]CC(O)COc1cccc1CC=C</chem>      |
| Name:       | Propranolol                                     |
| Method:     | Uptake/Binding                                  |
| References: | 3, 4, 6                                         |
| Structure:  | <chem>CC(C)[NH2+]CC(O)COc1cccc2cccc12</chem>    |
| Name:       | Nortriptyline                                   |
| Method:     | Pharmacological Effect                          |
| References: | 6, 522                                          |
| Structure:  | <chem>C[NH2+]CCC=C1c2cccc2CCc2cccc12</chem>     |
| Name:       | Mianserin                                       |
| Method:     | Pharmacological Effect                          |
| References: | 6, 510                                          |
| Structure:  | <chem>C[NH+]1CCN2C(Cl)c1cccc1Cc1cccc21</chem>   |
| Name:       | Amitriptyline                                   |
| Method:     | Pharmacological Effect                          |
| References: | 6, 512                                          |
| Structure:  | <chem>C[NH+](C)CCC=C1c2cccc2CCc2cccc12</chem>   |
| Name:       | Maprotiline                                     |
| Method:     | Pharmacological Effect                          |
| References: | 6, 523                                          |
| Structure:  | <chem>C[NH2+]CCCC12CCC(c3cccc13)c1cccc21</chem> |
| Name:       | Perhexiline                                     |
| Method:     | Pharmacological Effect                          |
| References: | 2, 6, 510                                       |

|             |                                                                                      |
|-------------|--------------------------------------------------------------------------------------|
| Structure:  | <chem>C1CCC(CC1)C(CC1CCCC[NH2+])C1CCC<br/>CC1</chem>                                 |
| Name:       | Promazine                                                                            |
| Method:     | Uptake/Binding                                                                       |
| References: | 6, 175                                                                               |
| Structure:  | <chem>C[NH+](C)CCCN1c2ccccc2Sc2ccccc12</chem>                                        |
| Name:       | Iprindole                                                                            |
| Method:     | Pharmacological Effect                                                               |
| References: | 6, 512                                                                               |
| Structure:  | <chem>C[NH+](C)CCCN1c2CCCCC2c2ccccc12</chem>                                         |
| Name:       | Cyanopindolol                                                                        |
| Method:     | Uptake/Binding                                                                       |
| References: | 3                                                                                    |
| Structure:  | <chem>CC(C)(C)[NH2+]CC(O)COc1cccc2[nH]c(cc1<br/>2)C#N</chem>                         |
| Name:       | N3246; Neutral red                                                                   |
| Method:     | Fluorescence Microscopy                                                              |
| References: | 583                                                                                  |
| Structure:  | <chem>CN(C)c1ccc2nc3cc(C)c(N)cc3nc2c1</chem>                                         |
| Name:       | Noxiptiline                                                                          |
| Method:     | Pharmacological Effect                                                               |
| References: | 6, 512                                                                               |
| Structure:  | <chem>C[NH+](C)CCON=C1c2ccccc2CCc2ccccc12</chem>                                     |
| Name:       | Chlorcyclizine                                                                       |
| Method:     | Pharmacological Effect                                                               |
| References: | 2, 6, 718                                                                            |
| Structure:  | <chem>C[NH+]1CCN(CC1)C(c1ccccc1)c1ccc(Cl)cc1</chem>                                  |
| Name:       | Biperiden                                                                            |
| Method:     | Uptake/Binding                                                                       |
| References: | 5                                                                                    |
| Structure:  | <chem>OC(CC[NH+]1CCCCC1)(C1CC2CC1C=C2)<br/>c1ccccc1</chem>                           |
| Name:       | Clomipramine                                                                         |
| Method:     | Fluorescence Microscopy                                                              |
| References: | 6, 522                                                                               |
| Structure:  | <chem>C[NH+](C)CCCN1c2ccccc2CCc2ccc(Cl)cc12</chem>                                   |
| Name:       | Chloroquine                                                                          |
| Method:     | Pharmacological Effect                                                               |
| References: | 673                                                                                  |
| Structure:  | <chem>CC[NH+](CC)CCCC(C)Nc1cc[nH+]c2cc(Cl)<br/>ccc12</chem>                          |
| Name:       | D113; 5-dimethylaminonaphthalene-1-(N-(5-aminopentyl)sulfonamide (dansyl cadaverine) |
| Method:     | Fluorescence Microscopy                                                              |
| References: | 51                                                                                   |
| Structure:  | <chem>CN(C)c1cccc2c(cccc12)S(=O)(=O)NCCCC[<br/>NH3+]</chem>                          |
| Name:       | Hydroxychloroquine                                                                   |
| Method:     | Fluorescence Microscopy                                                              |

|             |                                                                                                     |
|-------------|-----------------------------------------------------------------------------------------------------|
| References: | 45                                                                                                  |
| Structure:  | <chem>CC[NH+](CCO)CCCC(C)Nc1cc[nH+]c2cc(C<br/>1)ccc12</chem>                                        |
| Name:       | L7534; LysoTracker® Green DND-153                                                                   |
| Method:     | Fluorescence Microscopy                                                                             |
| References: | 663                                                                                                 |
| Structure:  | <chem>C[NH+](C)CCNc1ccc2-<br/>c3nc4ccccc4n3C(=O)c3ccccc1c23</chem>                                  |
| Name:       | Indomethacin                                                                                        |
| Method:     | Fluorescence Microscopy                                                                             |
| References: | 127                                                                                                 |
| Structure:  | <chem>COc1ccc2n(C(=O)c3ccc(Cl)cc3)c(C)c(CC([O<br/>-])=O)c2c1</chem>                                 |
| Name:       | 11                                                                                                  |
| Method:     | Uptake/Binding                                                                                      |
| References: | 7                                                                                                   |
| Structure:  | <chem>CC(C)C(C(=O)[N-]C#N)c1cccc(c1)-<br/>c1ccc(cc1)N1CC[NH2+]CC1</chem>                            |
| Name:       | L7545; LysoTracker® Yellow/Blue DND-160                                                             |
| Method:     | Fluorescence Microscopy                                                                             |
| References: | 654                                                                                                 |
| Structure:  | <chem>C[NH+](C)CCNC(=O)COc1ccc(cc1)-<br/>c1cnc(o1)-c1ccncc1</chem>                                  |
| Name:       | Thiuridazine                                                                                        |
| Method:     | Uptake/Binding                                                                                      |
| References: | 6, 175, 510                                                                                         |
| Structure:  | <chem>CSc1ccc2Sc3ccccc3N(CCC3CCCC[NH+]3C)<br/>c2c1</chem>                                           |
| Name:       | Tamoxifen                                                                                           |
| Method:     | Pharmacological Effect                                                                              |
| References: | 2, 6, 510                                                                                           |
| Structure:  | <chem>CC(C(c1ccccc1)=C(/c1ccccc1)c1ccc(OCC[N<br/>H+](C)C)cc1</chem>                                 |
| Name:       | L7533; LysoTracker® Blue DND-167                                                                    |
| Method:     | Fluorescence Microscopy                                                                             |
| References: | 655                                                                                                 |
| Structure:  | <chem>C1C[NH+](CCO1)Cc1c2ccccc2c(C[NH+]2C<br/>COCC2)c2ccccc12</chem>                                |
| Name:       | Mefloquine                                                                                          |
| Method:     | Fluorescence Microscopy                                                                             |
| References: | 529, 530                                                                                            |
| Structure:  | <chem>OC(C1CCCC[NH2+])c1cc(nc2c(cccc12)C(F<br/>)F)C(F)F</chem>                                      |
| Name:       | D1552; N-(3-((2,4-dinitrophenyl)amino)propyl)-N-(3-aminopropyl)methylamine, dihydrochloride<br>DAMP |
| Method:     | histo                                                                                               |
| References: | 598                                                                                                 |
| Structure:  | <chem>C[NH+](CCC[NH3+])CCCNc1ccc(cc1N(=O)<br/>=O)N(=O)=O</chem>                                     |

|             |                                                                                |
|-------------|--------------------------------------------------------------------------------|
| Name:       | D10460; Dapoxyl® (2-aminoethyl)sulfonamide                                     |
| Method:     | Fluorescence Microscopy                                                        |
| References: | 682                                                                            |
| Structure:  | <chem>CN(C)c1ccc(cc1)-c1cnc(o1)-c1ccc(cc1)S(=O)(=O)NCC[NH3+]</chem>            |
| Name:       | L7535; LysoTracker® Green DND-189                                              |
| Method:     | Fluorescence Microscopy                                                        |
| References: | 352                                                                            |
| Structure:  | <chem>O=C1c2cccc3c(NCCN4CCOCC4)ccc(-c4nc5ccccc5n14)c23</chem>                  |
| Name:       | L7526; LysoTracker® Green DND-26                                               |
| Method:     | Fluorescence Microscopy                                                        |
| References: | 500, 584                                                                       |
| Structure:  | <chem>C[NH+](C)CCNC(=O)CCC1=[N+]2C(C=C1)=Cc1c(C)cc(C)n1[B-]2(F)F</chem>        |
| Name:       | L7528; LysoTracker® Red DND-99                                                 |
| Method:     | Fluorescence Microscopy                                                        |
| References: | 584                                                                            |
| Structure:  | <chem>C[NH+](C)CCNC(=O)CCC1=[N+]2C(C=C1)=Cc1ccc(-c3ccc[nH]3)n1[B-]2(F)F</chem> |
| Name:       | Mepacrine; Quinacrine                                                          |
| Method:     | Fluorescence Microscopy                                                        |
| References: | 6, 127, 510                                                                    |
| Structure:  | <chem>CC[NH+](CC)CCCC(C)Nc1c2ccc(Cl)cc2[nH+]c2ccc(OC)cc12</chem>               |
| Name:       | Trifluoperazine                                                                |
| Method:     | Uptake/Binding                                                                 |
| References: | 5                                                                              |
| Structure:  | <chem>CN1CC[NH+](CCCN2c3ccccc3Sc3ccc(cc23)C(F)(F)F)CC1</chem>                  |
| Name:       | Disobutamide                                                                   |
| Method:     | Cell Fractionation                                                             |
| References: | 6, 513                                                                         |
| Structure:  | <chem>CC(C)[NH+](CCC(CC[NH+])1CCCCC1)(C(N)=O)c1ccccc1Cl)C(C)C</chem>           |
| Name:       | Tilorone; [2,7-bis-[2-(diethylamino)ethoxy]fluoren-9                           |
| Method:     | Fluorescence Microscopy                                                        |
| References: | 6, 517, 518                                                                    |
| Structure:  | <chem>CC[NH+](CC)CCOc1ccc-2c(c1)C(=O)c1cc(OCC[NH+](CC)CC)ccc-21</chem>         |
| Name:       | Diltiazem                                                                      |
| Method:     | Uptake/Binding                                                                 |
| References: | 5                                                                              |
| Structure:  | <chem>COc1ccc(cc1)C1Sc2ccccc2N(CC[NH+](C)C)C(=O)C1OC(C)=O</chem>               |
| Name:       | Triparanol                                                                     |
| Method:     | Pharmacological Effect                                                         |
| References: | 6, 520                                                                         |

|             |                                                                                                              |
|-------------|--------------------------------------------------------------------------------------------------------------|
| Structure:  | <chem>CC[NH+](CC)CCOc1ccc(cc1)C(O)(Cc1ccc(Cl)cc1)c1ccc(C)cc1</chem>                                          |
| Name:       | 1                                                                                                            |
| Method:     | Fluorescence Microscopy                                                                                      |
| References: | 7                                                                                                            |
| Structure:  | <chem>CN1CCN(CC1)c1nc(cs1)-c1ccc(cc1)C(=O)NC1(CCCCC1)C(=O)[N-]C#N</chem>                                     |
| Name:       | Verapamil                                                                                                    |
| Method:     | Uptake/Binding                                                                                               |
| References: | 5                                                                                                            |
| Structure:  | <chem>COc1ccc(CC[NH+](C)CCCC(C#N)(C(C)C)c2ccc(OC)c(OC)c2)cc1OC</chem>                                        |
| Name:       | 10                                                                                                           |
| Method:     | Uptake/Binding                                                                                               |
| References: | 7                                                                                                            |
| Structure:  | <chem>CCC[NH+]1CCN(CC1)c1nc(cs1)-c1ccc(cc1)C(=O)NC1(CCCCC1)C(=O)[N-]C#N</chem>                               |
| Name:       | F7030; FUN® 1                                                                                                |
| Method:     | Fluorescence Microscopy                                                                                      |
| References: | 606                                                                                                          |
| Structure:  | <chem>C[n+]1c(sc2ccccc12)\C=C1/C=C(Cl)N(c2ccc(cc2)c2ccccc12</chem>                                           |
| Name:       | T3166; N-(3-triethylammoniumpropyl)-4-(6-(4-(diethylamino)phenyl)hexatrienyl)pyridinium dibromide FM® 4-64   |
| Method:     | NA                                                                                                           |
| References: | Invi                                                                                                         |
| Structure:  | <chem>CCN(CC)c1ccc(cc1)\C=C\C=C\C=C\Cc1cc[n+](CCC[N+](CC)(CC)CC)cc1</chem>                                   |
| Name:       | Desethylamiodarone                                                                                           |
| Method:     | Cell Fractionation                                                                                           |
| References: | 6, 24, 521                                                                                                   |
| Structure:  | <chem>CCCCc1oc2ccccc2c1C(=O)c1cc(I)c(OCC[NH2+](CC)CC)c(I)c1</chem>                                           |
| Name:       | Amiodarone                                                                                                   |
| Method:     | Pharmacological Effect                                                                                       |
| References: | 2, 6, 24, 42, 510                                                                                            |
| Structure:  | <chem>CCCCc1oc2ccccc2c1C(=O)c1cc(I)c(OCC[NH+](CC)CC)c(I)c1</chem>                                            |
| Name:       | N3524; 6-((N-(7-nitrobenz-2-oxa-1,3-diazol-4-yl)amino)hexanoyl)sphingosyl phosphocholineNBD C6-sphingomyelin |
| Method:     | Fluorescence Microscopy                                                                                      |
| References: | 636                                                                                                          |
| Structure:  | <chem>CCCCCCCCCCCC\C=C\C(O)C(COP([O-])(=O)OCC[N+](C)(C)C)NC(=O)CCCCNc1ccc(c2nonc12)N(=O)=O</chem>            |
| Name:       | Azithromycin                                                                                                 |

|             |                                                                                                                        |
|-------------|------------------------------------------------------------------------------------------------------------------------|
| Method:     | Cell Fractionation                                                                                                     |
| References: | 162                                                                                                                    |
| Structure:  | <chem>CCC1OC(=O)C(C)C(OC2CC(C)(OC)C(O)C(C)O2)C(C)C(OC2OC(C)CC(C2O)[NH+](C)C)C(C)(O)CC(C)C[NH+](C)C(C)C(O)C1(C)O</chem> |
| Name:       | Netilmicin                                                                                                             |
| Method:     | Pharmacological Effect                                                                                                 |
| References: | 23                                                                                                                     |
| Structure:  | <chem>CC[NH2+]C1CC([NH3+])C(OC2OC(C[NH3+])=CCC2[NH3+])C(O)C1OC1OCC(C)(O)C([NH2+])C1O</chem>                            |
| Name:       | 3-Aminopropanal                                                                                                        |
| Method:     | Fluorescence Microscopy                                                                                                |
| References: | 11                                                                                                                     |
| Structure:  | <chem>[NH3+]CCC=O</chem>                                                                                               |
| Name:       | Stilbamidine                                                                                                           |
| Method:     | Fluorescence Microscopy                                                                                                |
| References: | 127                                                                                                                    |
| Structure:  | <chem>NC(=[NH2+])c1ccc(cc1)\C=C\c1ccc(cc1)C(N)=[NH2+]</chem>                                                           |
| Name:       | Hydroxystilbamide                                                                                                      |
| Method:     | Fluorescence Microscopy                                                                                                |
| References: | 127                                                                                                                    |
| Structure:  | <chem>NC(=[NH2+])C1=CC(=O)C(/C=C1)=C/C=C1C=CC(C=C1)=C(N)N</chem>                                                       |
| Name:       | Antrycide                                                                                                              |
| Method:     | Fluorescence Microscopy                                                                                                |
| References: | 127                                                                                                                    |
| Structure:  | <chem>CN1C(C)=CC(=[NH2+])c2cc(Nc3cc(C)[n+](C)c(N)n3)ccc12</chem>                                                       |
| Name:       | Dexamethasone                                                                                                          |
| Method:     | Fluorescence Microscopy                                                                                                |
| References: | 127                                                                                                                    |
| Structure:  | <chem>CC1CC2C3CCC4=CC(=O)C=CC4(C)C3(F)C(O)CC2(C)C1(O)C(=O)CO</chem>                                                    |
| Name:       | Eosin                                                                                                                  |
| Method:     | Fluorescence Microscopy                                                                                                |
| References: | 127                                                                                                                    |
| Structure:  | <chem>[O-]C(=O)c1cccc1C1=C2C=C(Br)C(=O)C(Br)=C2Oc2c(Br)c([O-])c(Br)cc12</chem>                                         |
| Name:       | Anthracene                                                                                                             |
| Method:     | Fluorescence Microscopy                                                                                                |
| References: | 127                                                                                                                    |
| Structure:  | <chem>C1=CC2=CC3=C(C=CC=C3)C=C2C=C1</chem>                                                                             |
| Name:       | Vitamin A                                                                                                              |
| Method:     | Fluorescence Microscopy                                                                                                |
| References: | 127                                                                                                                    |
| Structure:  | <chem>CC(\C=C\C=C(C)C=C\C=C1=C(C)CCCC1(C)C)=C/CO</chem>                                                                |

|             |                                                                                                                                                          |
|-------------|----------------------------------------------------------------------------------------------------------------------------------------------------------|
| Name:       | Uroporphyrin I                                                                                                                                           |
| Method:     | Fluorescence Microscopy                                                                                                                                  |
| References: | 127                                                                                                                                                      |
| Structure:  | <chem>[O-]C(=O)CCc1c(CC([O-])=O)c2cc3[nH]c(cc4[nH]c(cc5nc(cc1n2)c(C)C([O-])=O)c5CCC([O-])=O)c(CC([O-])=O)c4CCC([O-])=O)c(CC([O-])=O)c3CCC([O-])=O</chem> |
| Name:       | Amantadine                                                                                                                                               |
| Method:     | Pharmacological Effect                                                                                                                                   |
| References: | 5, 229                                                                                                                                                   |
| Structure:  | <chem>[NH3+]C12CC3CC(CC(C3)C1)C2</chem>                                                                                                                  |
| Name:       | Atropine                                                                                                                                                 |
| Method:     | Pharmacological Effect                                                                                                                                   |
| References: | 5, 229                                                                                                                                                   |
| Structure:  | <chem>C[NH+]1C2CCC1CC(C2)OC(=O)C(CO)c1ccc1</chem>                                                                                                        |
| Name:       | LCL284                                                                                                                                                   |
| Method:     | Pharmacological Effect                                                                                                                                   |
| References: | 13                                                                                                                                                       |
| Structure:  | <chem>CCCCCCCCCCCC[NH2+]C(C)C(O)c1ccc1</chem>                                                                                                            |
| Name:       | LCL204                                                                                                                                                   |
| Method:     | Pharmacological Effect                                                                                                                                   |
| References: | 13                                                                                                                                                       |
| Structure:  | <chem>CCCCCCCCCCCC[NH2+]C(CO)C(O)c1ccc(cc1)N(=O)=O</chem>                                                                                                |
| Name:       | MSDH; O-methyl-serine dodecylamine hydrochloride                                                                                                         |
| Method:     | Pharmacological Effect                                                                                                                                   |
| References: | 44, 46                                                                                                                                                   |
| Structure:  | <chem>CCCCCCCCCCCCN(C(=O)C([NH3+])COC</chem>                                                                                                             |
| Name:       | Serine Dodecylamide; SDA                                                                                                                                 |
| Method:     | Pharmacological Effect                                                                                                                                   |
| References: | 46                                                                                                                                                       |
| Structure:  | <chem>CCCCCCCCCCCCN(C(=O)C([NH3+])CO</chem>                                                                                                              |
| Name:       | N-dodecylimidazole                                                                                                                                       |
| Method:     | Pharmacological Effect                                                                                                                                   |
| References: | 46                                                                                                                                                       |
| Structure:  | <chem>CCCCCCCCCCCCn1ccnc1</chem>                                                                                                                         |
| Name:       | Dansylamylamine; MDH                                                                                                                                     |
| Method:     | Fluorescence Microscopy                                                                                                                                  |
| References: | 62                                                                                                                                                       |
| Structure:  | <chem>CCCCCNS(=O)(=O)c1cccc2c(cccc12)N(C)C</chem>                                                                                                        |
| Name:       | D-tubocurarine                                                                                                                                           |
| Method:     | Cell Fractionation                                                                                                                                       |
| References: | 73                                                                                                                                                       |
| Structure:  | <chem>COc1cc2CC[NH+](C)C3Cc4ccc(Oc5c(O)c(O)C)cc6CC[N+](C)(C)C(Cc7ccc(O)c(Oc1cc23)c7)c56)cc4</chem>                                                       |

|             |                                                                                                                                               |
|-------------|-----------------------------------------------------------------------------------------------------------------------------------------------|
| Name:       | PPC; Pyridinium Zn (II) phthalocyanine                                                                                                        |
| Method:     | Fluorescence Microscopy                                                                                                                       |
| References: | 87                                                                                                                                            |
| Structure:  | <chem>C(c1ccc2c3nc(nc4n5[Zn]n6c(nc7nc(nc5c5cc(C[n+]8cccc8)ccc45)c4ccc(C[n+]5cccc5)cc74)c4ccc(C[n+]5cccc5)cc4c6n3)c2c1)[n+]1ccc1</chem>        |
| Name:       | TSPC; Tetrasulfonated Zn(II) phthalocyanine                                                                                                   |
| Method:     | Fluorescence Microscopy                                                                                                                       |
| References: | 87                                                                                                                                            |
| Structure:  | <chem>[O-]S(=O)(=O)c1ccc2c3nc(nc4n5[Zn]n6c(nc7nc(nc5c5cc(ccc45)S([O-])(=O)=O)c4ccc(cc74)S([O-])(=O)=O)c4ccc(cc4c6n3)S([O-])(=O)=O)c2c1</chem> |
| Name:       | Hypericin                                                                                                                                     |
| Method:     | Fluorescence Microscopy                                                                                                                       |
| References: | 90                                                                                                                                            |
| Structure:  | <chem>Cc1cc(O)c2C(=O)c3c(O)cc([O-])c4c5c([O-])cc(O)c6C(=O)c7c(O)cc(C)c8c1c2c(c34)c(c78)c56</chem>                                             |
| Name:       | EtNBS; 5-ethylamino-9-diethyl-aminobenzo[a]phenothiazinium chloride                                                                           |
| Method:     | Fluorescence Microscopy                                                                                                                       |
| References: | 96                                                                                                                                            |
| Structure:  | <chem>CC\N=C1/C=C2Sc3cc(ccc3N=C2c2cccc12)N(CC)CC</chem>                                                                                       |
| Name:       | Ofloxacin                                                                                                                                     |
| Method:     | Fluorescence Microscopy                                                                                                                       |
| References: | 97                                                                                                                                            |
| Structure:  | <chem>CC1COc2c(N3CCN(C)CC3)c(F)cc3C(=O)C(=CN1c23)C([O-])=O</chem>                                                                             |
| Name:       | Norfloxacin                                                                                                                                   |
| Method:     | Fluorescence Microscopy                                                                                                                       |
| References: | 97                                                                                                                                            |
| Structure:  | <chem>CCN1C=C(C([O-])=O)C(=O)c2cc(F)c(cc12)N1CC[NH2+ ]CC1</chem>                                                                              |
| Name:       | Lomefloxacin                                                                                                                                  |
| Method:     | Fluorescence Microscopy                                                                                                                       |
| References: | 97                                                                                                                                            |
| Structure:  | <chem>CCN1C=C(C([O-])=O)C(=O)c2cc(F)c(N3CC[NH2+ ]C(C)C3)c(F)c12</chem>                                                                        |
| Name:       | BAYy3118                                                                                                                                      |
| Method:     | Fluorescence Microscopy                                                                                                                       |
| References: | 97                                                                                                                                            |
| Structure:  | <chem>[O-]C(=O)C1=CN(C2CC2)c2c(Cl)c(N3CC4CCC[NH2+ ]C4C3)c(F)cc2C1=O</chem>                                                                    |
| Name:       | Cyamemazine; CMZ                                                                                                                              |

|             |                                                                                                                                   |
|-------------|-----------------------------------------------------------------------------------------------------------------------------------|
| Method:     | Fluorescence Microscopy                                                                                                           |
| References: | 101                                                                                                                               |
| Structure:  | <chem>CC(CN1c2cccc2Sc2ccc(cc12)C#N)C[NH+](C)C</chem>                                                                              |
| Name:       | PCI-0123; Lutetium Texapyrin                                                                                                      |
| Method:     | Fluorescence Microscopy                                                                                                           |
| References: | 110                                                                                                                               |
| Structure:  | <chem>CCC1=C(CC)/C2=C/C3=N/C(=C\N=C4\C=C(OCCOCCOCCOC)C(OCCOCCOCCOC)=C\C4=N\C=C4/N=C(/C=C\1N2[Lu])C(CCCO)=C/4C)/C(C)=C3CCCO</chem> |
| Name:       | NBA                                                                                                                               |
| Method:     | Fluorescence Microscopy                                                                                                           |
| References: | 112                                                                                                                               |
| Structure:  | <chem>CCN(CC)c1ccc2N=C3C(Oc2c1)=CC(=N)c1cccc31</chem>                                                                             |
| Name:       | NBA-6I                                                                                                                            |
| Method:     | Fluorescence Microscopy                                                                                                           |
| References: | 112                                                                                                                               |
| Structure:  | <chem>CCN(CC)c1ccc2N=C3c4cccc4C(=N)C(I)=C3Oc2c1</chem>                                                                            |
| Name:       | NBS                                                                                                                               |
| Method:     | Fluorescence Microscopy                                                                                                           |
| References: | 112                                                                                                                               |
| Structure:  | <chem>CCN(CC)c1ccc2N=C3C(Sc2c1)=CC(=[NH2+])c1cccc31</chem>                                                                        |
| Name:       | NBS-6I                                                                                                                            |
| Method:     | Fluorescence Microscopy                                                                                                           |
| References: | 112                                                                                                                               |
| Structure:  | <chem>CCN(CC)c1ccc2N=C3c4cccc4C(=N)C(I)=C3Sc2c1</chem>                                                                            |
| Name:       | Sat-NBS                                                                                                                           |
| Method:     | Fluorescence Microscopy                                                                                                           |
| References: | 112                                                                                                                               |
| Structure:  | <chem>CCN(CC)c1ccc2N=C3C(Sc2c1)=CC(=[NH2+])C1=C3CCCC1</chem>                                                                      |
| Name:       | Sat-NBS-6I                                                                                                                        |
| Method:     | Fluorescence Microscopy                                                                                                           |
| References: | 112                                                                                                                               |
| Structure:  | <chem>CCN(CC)c1ccc2N=C3C4=C(CCCC4)C(=N)C(I)=C3Sc2c1</chem>                                                                        |
| Name:       | AlPcS2a                                                                                                                           |
| Method:     | Fluorescence Microscopy                                                                                                           |
| References: | 125                                                                                                                               |
| Structure:  | <chem>O[Al-]1(O)n2c3cc4nc(cc5n1c(cc1nc(cc2c2cccc32)c2cccc(c12)S([O-])(=O)=O)c1cccc(c51)S([O-])(=O)=O)c1cccc41</chem>              |
| Name:       | Gimatecan                                                                                                                         |
| Method:     | Fluorescence Microscopy                                                                                                           |
| References: | 130                                                                                                                               |

|             |                                                                                                                                                                  |
|-------------|------------------------------------------------------------------------------------------------------------------------------------------------------------------|
| Structure:  | <chem>CCC1(O)C(=O)OCC2=C1C=C1N(Cc3c1nc1c4cccc1c3\C=N\OC(C)(C)C)C2=O</chem>                                                                                       |
| Name:       | DADP-o; 5,15-di[4-(N-trimethylaminophenyl)-10,20-diphenylporphyrin                                                                                               |
| Method:     | Fluorescence Microscopy                                                                                                                                          |
| References: | 138                                                                                                                                                              |
| Structure:  | <chem>C[N+](C)(C)c1ccc(cc1)-c1c2ccc(n2)c(-c2ccccc2)c2ccc([nH]2)c(-c2ccc(cc2)[N+](C)(C)C)c2ccc(n2)c(-c2ccccc2)c2ccc1[nH]2</chem>                                  |
| Name:       | Tilmicosin                                                                                                                                                       |
| Method:     | Cell Fractionation                                                                                                                                               |
| References: | 145                                                                                                                                                              |
| Structure:  | <chem>CCC1OC(=O)CC(O)C(C)C(OC2OC(C)C(O)C(C2O)[NH+](C)C)C(CC[NH+]2CC(C)CC(C)C2)CC(C)C(=O)\C=C\C(C)=C\C1COC1OC(C)C(O)C(OC)C1OC</chem>                              |
| Name:       | Roxithromycin                                                                                                                                                    |
| Method:     | Cell Fractionation                                                                                                                                               |
| References: | 160                                                                                                                                                              |
| Structure:  | <chem>CCC1OC(=O)C(C)C(OC2CC(C)(OC)C(O)C(C)O2)C(C)C(OC2OC(C)CC(C2O)[NH+](C)C)C(C)(O)CC(C)\C(=N\OCOCOC)C(C)C(O)C1(C)O</chem>                                       |
| Name:       | Erythromycin                                                                                                                                                     |
| Method:     | Cell Fractionation                                                                                                                                               |
| References: | 160                                                                                                                                                              |
| Structure:  | <chem>CCC1OC(=O)C(C)C(OC2CC(C)(OC)C(O)C(C)O2)C(C)C(OC2OC(C)CC(C2O)[NH+](C)C)C(C)(O)CC(C)C(=O)C(C)C(O)C1(C)O</chem>                                               |
| Name:       | Sertraline                                                                                                                                                       |
| Method:     | Uptake/Binding                                                                                                                                                   |
| References: | 175                                                                                                                                                              |
| Structure:  | <chem>C[NH2+]C1CCC(c2ccc(Cl)c(Cl)c2)c2ccccc12</chem>                                                                                                             |
| Name:       | Perazine                                                                                                                                                         |
| Method:     | Uptake/Binding                                                                                                                                                   |
| References: | 175                                                                                                                                                              |
| Structure:  | <chem>CN1CC[NH+](CCCN2c3ccccc3Sc3ccccc23)CC1</chem>                                                                                                              |
| Name:       | IR-1                                                                                                                                                             |
| Method:     | Fluorescence Microscopy                                                                                                                                          |
| References: | 193                                                                                                                                                              |
| Structure:  | <chem>CC1(C)\C(=C/C=C2CCCC(/C=C/C3=[N+](C)CCCS([O-])(=O)=O)c4ccccc4C3(C)C)=C\2Oc2cccc(CC(C(=O)NCC3OC(O)C([NH3+])C(O)C3O)cc2)N(CCCCS([O-])(=O)=O)c2ccccc12</chem> |
| Name:       | IR-2                                                                                                                                                             |
| Method:     | Fluorescence Microscopy                                                                                                                                          |
| References: | 193, 506                                                                                                                                                         |

|             |                                                                                                                                                                                                                                                                          |
|-------------|--------------------------------------------------------------------------------------------------------------------------------------------------------------------------------------------------------------------------------------------------------------------------|
| Structure:  | <chem>CC1(C)\C(=C/C=C2CCCC(/C=C/C3=[N+](C)CCCS([O-])(=O)=O)c4ccccc4C3(C)C)=C\2Oc2cccc(OC(CCC[NH2+]CC3OC(O)C([NH3+])C(O)C3O)c2)N(CCCCS([O-])(=O)=O)c2ccccc12</chem>                                                                                                       |
| Name:       | AR-L 115 BS; Sulmazole                                                                                                                                                                                                                                                   |
| Method:     | Pharmacological Effect                                                                                                                                                                                                                                                   |
| References: | 196                                                                                                                                                                                                                                                                      |
| Structure:  | <chem>COc1cc(ccc1-c1nc2cccc2[nH]1)S(C)=O</chem>                                                                                                                                                                                                                          |
| Name:       | HX-CH 44 BS                                                                                                                                                                                                                                                              |
| Method:     | Pharmacological Effect                                                                                                                                                                                                                                                   |
| References: | 196                                                                                                                                                                                                                                                                      |
| Structure:  | <chem>COc1ccc2N=C(N(C)C(=O)c2c1)c1ccc(OCC(O)C[NH2+]C(C)(C)C)cc1</chem>                                                                                                                                                                                                   |
| Name:       | SX-AB 1316 SE                                                                                                                                                                                                                                                            |
| Method:     | Pharmacological Effect                                                                                                                                                                                                                                                   |
| References: | 196                                                                                                                                                                                                                                                                      |
| Structure:  | <chem>[O-]C(=O)Cc1ccc2CC(Cc2c1)NS(=O)(=O)c1ccc(Cl)cc1</chem>                                                                                                                                                                                                             |
| Name:       | AF-CX 1325 XX                                                                                                                                                                                                                                                            |
| Method:     | Pharmacological Effect                                                                                                                                                                                                                                                   |
| References: | 196                                                                                                                                                                                                                                                                      |
| Structure:  | <chem>N\C(c1ccccc1)=C1/C(=O)c2ccccc2S1=O</chem>                                                                                                                                                                                                                          |
| Name:       | Oritavancin                                                                                                                                                                                                                                                              |
| Method:     | Pharmacological Effect                                                                                                                                                                                                                                                   |
| References: | 201                                                                                                                                                                                                                                                                      |
| Structure:  | <chem>C[NH2+]C(CC(C)C)C(=O)NC1C(O)c2ccc(Oc3cc4cc(Oc5ccc(cc5Cl)C(OC5CC(C)([NH3+])C(O)C(C)O5)C5NC(=O)C(NC(=O)C4NC(=O)C(CC(N)=O)NC1=O)c1ccc(O)c(c1)-c1c(O)cc(O)cc1C(NC5=O)C([O-])=O)c3OC1OC(CO)C(O)C(O)C1OC1CC(C)([NH2+])Cc3ccc(cc3)-c3ccc(Cl)cc3)C(O)C(C)O1)c(Cl)c2</chem> |
| Name:       | Tobramycin                                                                                                                                                                                                                                                               |
| Method:     | histo                                                                                                                                                                                                                                                                    |
| References: | 208                                                                                                                                                                                                                                                                      |
| Structure:  | <chem>[NH3+]CC1OC(OC2C([NH3+])CC([NH3+])C(OC3OC(CO)C(O)C([NH3+])C3O)C2O)C([NH3+])CC1O</chem>                                                                                                                                                                             |
| Name:       | Vancomycin                                                                                                                                                                                                                                                               |
| Method:     | histo                                                                                                                                                                                                                                                                    |
| References: | 208                                                                                                                                                                                                                                                                      |
| Structure:  | <chem>C[NH2+]C(CC(C)C)C(=O)NC1C(O)c2ccc(Oc3cc4cc(Oc5ccc(cc5Cl)C(O)C5NC(=O)C(NC(=O)C4NC(=O)C(CC(N)=O)NC1=O)c1ccc(O)c(c1)-c1c(O)cc(O)cc1C(NC5=O)C([O-])=O)c3OC1OC(CO)C(O)C(O)C1OC1CC(C)([NH3+])C(O)C(C)O1)c(Cl)c2</chem>                                                   |
| Name:       | ABP; N-(3-dimethylaminopropyl)benzylpenicillinamide                                                                                                                                                                                                                      |

|             |                                                                                                                                                                                                                                                                 |
|-------------|-----------------------------------------------------------------------------------------------------------------------------------------------------------------------------------------------------------------------------------------------------------------|
| Method:     | Cell Fractionation                                                                                                                                                                                                                                              |
| References: | 209                                                                                                                                                                                                                                                             |
| Structure:  | <chem>C[NH+](C)CCCNC(=O)C1N2C(SC1(C)C)C(NC(=O)Cc1cccc1)C2=O</chem>                                                                                                                                                                                              |
| Name:       | Bacteriopurpurinimide Derivative 7                                                                                                                                                                                                                              |
| Method:     | Fluorescence Microscopy                                                                                                                                                                                                                                         |
| References: | 212                                                                                                                                                                                                                                                             |
| Structure:  | <chem>CCCCCN1C(=O)C2=C(C)\C3=C\C4=N(C(=C/C5[NH2+])C(\C=C6/N=C(C(CCC(=O)OC)C6)C(C1=O)=C2N3)C(C)=C5C(C)OC)C(C)C4CC</chem>                                                                                                                                         |
| Name:       | CPT1                                                                                                                                                                                                                                                            |
| Method:     | Fluorescence Microscopy                                                                                                                                                                                                                                         |
| References: | 215                                                                                                                                                                                                                                                             |
| Structure:  | <chem>CCCOc1ccc(cc1)-c1c2ccc(n2)c(-c2ccc(OCCCCCCCCC[N+](C)(C)C)cc2)c2ccc([nH]2)c(-c2ccc(OCCCCCCCCC[N+](C)(C)C)cc2)c2ccc(n2)c(-c2ccc(OCCCCCCCCC[N+](C)(C)C)cc2)c2ccc1[nH]2</chem>                                                                                |
| Name:       | Benz(a)anthracene                                                                                                                                                                                                                                               |
| Method:     | Pharmacological Effect                                                                                                                                                                                                                                          |
| References: | 221                                                                                                                                                                                                                                                             |
| Structure:  | <chem>c1ccc2cc3c(ccc4ccccc34)cc2c1</chem>                                                                                                                                                                                                                       |
| Name:       | Benzo(a)pyrene                                                                                                                                                                                                                                                  |
| Method:     | Pharmacological Effect                                                                                                                                                                                                                                          |
| References: | 221                                                                                                                                                                                                                                                             |
| Structure:  | <chem>c1ccc2c(c1)cc1ccc3ccccc4ccc2c1c34</chem>                                                                                                                                                                                                                  |
| Name:       | 7,9-Dimethylbenz(c)acridine                                                                                                                                                                                                                                     |
| Method:     | Pharmacological Effect                                                                                                                                                                                                                                          |
| References: | 221                                                                                                                                                                                                                                                             |
| Structure:  | <chem>Cc1ccc2nc3c(ccc4ccccc34)c(C)c2c1</chem>                                                                                                                                                                                                                   |
| Name:       | 7,12-Dimethylbenz(a)anthracene                                                                                                                                                                                                                                  |
| Method:     | Pharmacological Effect                                                                                                                                                                                                                                          |
| References: | 221                                                                                                                                                                                                                                                             |
| Structure:  | <chem>Cc1c2ccccc2c(C)c2c1ccc1ccccc21</chem>                                                                                                                                                                                                                     |
| Name:       | 3-Methylcholanthrene                                                                                                                                                                                                                                            |
| Method:     | Pharmacological Effect                                                                                                                                                                                                                                          |
| References: | 221                                                                                                                                                                                                                                                             |
| Structure:  | <chem>Cc1ccc2cc3c(ccc4ccccc34)c3CCc1c23</chem>                                                                                                                                                                                                                  |
| Name:       | Porphyrin-MLS                                                                                                                                                                                                                                                   |
| Method:     | Fluorescence Microscopy                                                                                                                                                                                                                                         |
| References: | 211                                                                                                                                                                                                                                                             |
| Structure:  | <chem>CCC(C)C(NC(=O)C(CCCC[NH3+])NC(=O)C(C)NC(=O)C(CCCNC(N)=[NH2+])NC(=O)C1CCCN1C(=O)C(NC(=O)C1CCCN1C(=O)C(CC(C)C)NC(=O)C(CCCNC(N)=[NH2+])NC(=O)C(C)NC(=O)C(CO)NC(=O)CNC(=O)C(NC(=O)C(C)C)NC(=O)CNC(=O)C(CCCNC(N)=[NH2+])NC(=O)C(CC(C)C)NC(=O)C(CC(C)C)N</chem> |

|             |                                                                                                                                                                                                                                                                                                                              |
|-------------|------------------------------------------------------------------------------------------------------------------------------------------------------------------------------------------------------------------------------------------------------------------------------------------------------------------------------|
| Structure:  | <chem>C(=O)C(CC(C)C)NC(=O)C1CCCN1C(=O)C(NC(=O)C(CC(C)C)NC(=O)C(NC(=O)C(CO)NC(=O)C(CCSC)NC(=O)OCCOCCOCCOC)COCCOCCNC(=O)COCC(=O)Nc1ccc(cc1)C1=C2\A=CC(=N\2)/C(c2ccccc2)=C2/C=CC(=N/2)\C(c2ccccc2)=C2\A=CC(=N\2)/C(c2cccc2)=C2/C=CC\1=N/2)C(C)C(C)O)C(C)O)C(C)C)C(=O)NC(Cc1c[nH]cn1)C(=O)NC(C)O)C(=O)NC(CC(C)C)C([O-])=O</chem> |
| Name:       | Methotrexate Polyglutamate                                                                                                                                                                                                                                                                                                   |
| Method:     | Cell Fractionation                                                                                                                                                                                                                                                                                                           |
| References: | 195                                                                                                                                                                                                                                                                                                                          |
| Structure:  | <chem>CN(Cc1cnc2nc(N)nc(N)c2n1)c1ccc(cc1)C(=C)[NH2+](C(CCC(=O)NC(CCC(=O)NC(CCC(=O)NC(CCC([O-])=O)C([O-])=O)C([O-])=O)C([O-])=O)C([O-])=O</chem>                                                                                                                                                                              |
| Name:       | TPC-Ahx-ATWLPPR                                                                                                                                                                                                                                                                                                              |
| Method:     | Fluorescence Microscopy                                                                                                                                                                                                                                                                                                      |
| References: | 220                                                                                                                                                                                                                                                                                                                          |
| Structure:  | <chem>CC(C)CC(NC(=O)C(Cc1c[nH]c2ccccc12)NC(=O)C(NC(=O)C(C)NC(=O)CCCCNC(=O)c1ccc(cc1)-c1c2ccc(n2)c(-c2ccccc2)c2ccc([nH]2)c(-c2ccccc2)c2ccc1[nH]2)C(C)O)C(=O)N1CCC1C(=O)N1CCCC1C(=O)NC(CCCNC(N)=[NH2+])C([O-])=O</chem>                                                                                                        |
| Name:       | Sparfloxacin                                                                                                                                                                                                                                                                                                                 |
| Method:     | Fluorescence Microscopy                                                                                                                                                                                                                                                                                                      |
| References: | 223                                                                                                                                                                                                                                                                                                                          |
| Structure:  | <chem>CC1CN(CC(C)[NH2+])c1c(F)c(N)c2C(=O)C(=CN(C3CC3)c2c1F)C([O-])=O</chem>                                                                                                                                                                                                                                                  |
| Name:       | ATMPn; 9,-Acetoxy-2,7,12,17-tetrakis-(β-methoxyethyl)-porphycene                                                                                                                                                                                                                                                             |
| Method:     | Fluorescence Microscopy                                                                                                                                                                                                                                                                                                      |
| References: | 255                                                                                                                                                                                                                                                                                                                          |
| Structure:  | <chem>COCCc1cc2nc1ccc1[nH]c(cc1CCOC)c1cc(CCO)c(n1)c(OC(C)=O)cc1[nH]c2cc1CCOC</chem>                                                                                                                                                                                                                                          |
| Name:       | Telavancin                                                                                                                                                                                                                                                                                                                   |
| Method:     | Cell Fractionation                                                                                                                                                                                                                                                                                                           |
| References: | 286                                                                                                                                                                                                                                                                                                                          |
| Structure:  | <chem>CCCCCCCCC[NH2+](C)CC[NH2+](C)CC(OC(C)C1O)OC1C(O)C(O)C(CO)OC1Oc1c2Oc3ccc(cc3Cl)C(O)C(NC(=O)C(CC(C)C)[NH2+])C(=O)NC(CC(N)=O)C(=O)NC3C(=O)[N-]C4C(=O)NC(C(O)c5ccc(Oc1cc3c2)c(Cl)c5)C(=O)NC(C([O-])=O)c1cc(O)c(C[NH2+])CP(O)([O-])=O)c(O)c1-c1cc4ccc1O</chem>                                                              |
| Name:       | ZnPcOCH3                                                                                                                                                                                                                                                                                                                     |
| Method:     | Fluorescence Microscopy                                                                                                                                                                                                                                                                                                      |
| References: | 303                                                                                                                                                                                                                                                                                                                          |
| Structure:  | <chem>COc1ccc2c3nc(nc4n5[Zn]n6c(nc7nc(nc5c5cc(OC)ccc45)c4ccc(OC)cc74)c4ccc(OC)cc4c6n3</chem>                                                                                                                                                                                                                                 |



|             |                                                                                                                                                                         |
|-------------|-------------------------------------------------------------------------------------------------------------------------------------------------------------------------|
|             | )c2c1                                                                                                                                                                   |
| Name:       | EB1089                                                                                                                                                                  |
| Method:     | Fluorescence Microscopy                                                                                                                                                 |
| References: | 308                                                                                                                                                                     |
| Structure:  | CCC(O)(CC)\C=C\C=C\C(C)C1CCC2\C(CC<br>CC12C)=C/C=C1/CC(O)CC(O)C1=C                                                                                                      |
| Name:       | HexoTMPn                                                                                                                                                                |
| Method:     | Fluorescence Microscopy                                                                                                                                                 |
| References: | 323                                                                                                                                                                     |
| Structure:  | CCCCCCC(=O)Oc1cc2[nH]c(cc2CCOC)c2cc<br>(CCOC)c(ccc3[nH]c(cc3CCOC)c3cc(CCOC)<br>c1n3)n2                                                                                  |
| Name:       | PeloTMPn                                                                                                                                                                |
| Method:     | Fluorescence Microscopy                                                                                                                                                 |
| References: | 323                                                                                                                                                                     |
| Structure:  | CCCCCCCC(=O)Oc1cc2[nH]c(cc2CCOC)c<br>2cc(CCOC)c(ccc3[nH]c(cc3CCOC)c3cc(CCO<br>C)c1n3)n2                                                                                 |
| Name:       | CpoTMPn                                                                                                                                                                 |
| Method:     | Fluorescence Microscopy                                                                                                                                                 |
| References: | 323                                                                                                                                                                     |
| Structure:  | CCCCC(=O)Oc1cc2[nH]c(cc2CCOC)c2cc(<br>CCOC)c(ccc3[nH]c(cc3CCOC)c3cc(CCOC)c<br>1n3)n2                                                                                    |
| Name:       | EBC                                                                                                                                                                     |
| Method:     | Fluorescence Microscopy                                                                                                                                                 |
| References: | 332                                                                                                                                                                     |
| Structure:  | CCc1c(C)c2cc3[nH]c(c(C)c3CC)c3cc(cc4c3n<br>c(cc3[nH]c(cc1n2)c(C)c3CC)C4(C)CC)S([O-<br>])(=O)=O                                                                          |
| Name:       | Porphyrin-Retinamide Derivative 2                                                                                                                                       |
| Method:     | Fluorescence Microscopy                                                                                                                                                 |
| References: | 352                                                                                                                                                                     |
| Structure:  | CC(\C=C\C1=C(C)CCCC1(C)C)=C/C=C/C(C<br>)=C/C(=O)Nc1ccc(cc1)C1=C2\C=CC(=N\2)/<br>C(c2ccccc2)=C2NC(/C=C\2)=C(c2ccccc2)\C<br>2=N\C(/C=C2)=C(/C2[NH2+])C1\C=C2)c1ccc<br>cc1 |
| Name:       | Porphyrin-Retinamide Derivative 3                                                                                                                                       |
| Method:     | Fluorescence Microscopy                                                                                                                                                 |
| References: | 352                                                                                                                                                                     |
| Structure:  | CC(\C=C\C1=C(C)CCCC1(C)C)=C\C=C/C(C<br>)=C/C(=O)Nc1ccc(cc1)C1=C2\C=CC(=N\2)/<br>C(c2ccccc2)=C2NC(/C=C\2)=C(c2ccccc2)\C<br>2=N\C(/C=C2)=C(/C2[NH2+])C1\C=C2)c1ccc<br>cc1 |
| Name:       | Cationic Water-Soluble Phthalocyanine<br>Derivative 10                                                                                                                  |
| Method:     | Fluorescence Microscopy                                                                                                                                                 |
| References: | 353                                                                                                                                                                     |
| Structure:  | C[n+]<br>1cccc(Oc2cc3c4cc5n6[Zn]n7c(cc(n4)c3<br>cc2Oc2ccc[n+](C)c2)c2cc(Oc3ccc[n+](C)c3)c                                                                               |

|             |                                                                                                                                                                                                                                                                                                                                 |
|-------------|---------------------------------------------------------------------------------------------------------------------------------------------------------------------------------------------------------------------------------------------------------------------------------------------------------------------------------|
|             | (Oc3ccc[n+](C)c3)cc2c7cc2nc(cc6c3cc(Oc4c<br>cc[n+](C)c4)c(Oc4ccc[n+](C)c4)cc53)c3cc(O<br>c4ccc[n+](C)c4)c(Oc4ccc[n+](C)c4)cc23)c1                                                                                                                                                                                               |
| Name:       | Cationic Water-Soluble Phthalocyanine<br>Derivative 11                                                                                                                                                                                                                                                                          |
| Method:     | Fluorescence Microscopy                                                                                                                                                                                                                                                                                                         |
| References: | 353                                                                                                                                                                                                                                                                                                                             |
| Structure:  | COCCOCCOCC[n+]<br>1cccc(Oc2cc3c4cc5n6[Zn]n7c(cc(n4)c3cc2Oc2ccc[n+](COCCOCC<br>OC)c2)c2cc(Oc3ccc[n+](COCCOCCOC)c3)<br>c(Oc3ccc[n+](COCCOCCOC)c3)cc2c7cc2n<br>c(cc6c3cc(Oc4ccc[n+](COCCOCCOC)c4)c(<br>Oc4ccc[n+](COCCOCCOC)c4)cc53)c3cc(O<br>c4ccc[n+](COCCOCCOC)c4)c(Oc4ccc[n+](<br>COCCOCCOC)c4)cc23)c1                         |
| Name:       | Cationic Water-Soluble Phthalocyanine<br>Derivative 12                                                                                                                                                                                                                                                                          |
| Method:     | Fluorescence Microscopy                                                                                                                                                                                                                                                                                                         |
| References: | 353                                                                                                                                                                                                                                                                                                                             |
| Structure:  | CCC[Si](CCC)(CCC)[Si]1(N2C3=CC4=N\C(<br>=C/C5[NH+])1C(\C=C1/N=C(C=C2c2cc(Oc6<br>ccc[n+](C)c6)c(Oc6ccc[n+](C)c6)cc32)c2cc(<br>Oc3ccc[n+](C)c3)c(Oc3ccc[n+](C)c3)cc12)c1<br>cc(Oc2ccc[n+](C)c2)c(Oc2ccc[n+](C)c2)cc51<br>)c1cc(Oc2ccc[n+](C)c2)c(Oc2ccc[n+](C)c2)c<br>c41)[Si](CCC)(CCC)CCC                                       |
| Name:       | Cationic Water-Soluble Phthalocyanine<br>Derivative 13                                                                                                                                                                                                                                                                          |
| Method:     | Fluorescence Microscopy                                                                                                                                                                                                                                                                                                         |
| References: | 353                                                                                                                                                                                                                                                                                                                             |
| Structure:  | CCC(CC)[Si](C(CC)CC)(C(CC)CC)[Si]1([N<br>H+])2C3C=C4N=C(C=C5[NH+])1C(=CC1=N\<br>C(=C/C2c2cc(Oc6ccc[n+](C)c6)c(Oc6ccc[n+]<br>(C)c6)cc32)c2cc(Oc3ccc[n+](C)c3)c(Oc3ccc[<br>n+](C)c3)cc12)c1cc(Oc2ccc[n+](C)c2)c(Oc2c<br>cc[n+](C)c2)cc51)c1cc(Oc2ccc[n+](C)c2)c(O<br>c2ccc[n+](C)c2)cc41)[Si](C(CC)CC)(C(CC)C<br>C)C(CC)CC        |
| Name:       | Cationic Water-Soluble Phthalocyanine<br>Derivative 14                                                                                                                                                                                                                                                                          |
| Method:     | Fluorescence Microscopy                                                                                                                                                                                                                                                                                                         |
| References: | 353                                                                                                                                                                                                                                                                                                                             |
| Structure:  | C[n+]<br>1cccc(Oc2cc3C4\C=C5/N=C(/C=C6\N<br>H+])7C(=CC8=N\C(=C/C([NH+])4[Si]7([Si](c<br>4cccc4)(c4cccc4)C(C)(C)C)[Si](c4cccc4)(<br>c4cccc4)C(C)(C)C)c3cc2Oc2ccc[n+](C)c2)c<br>2cc(Oc3ccc[n+](C)c3)c(Oc3ccc[n+](C)c3)cc8<br>2)c2cc(Oc3ccc[n+](C)c3)c(Oc3ccc[n+](C)c3)<br>cc62)c2cc(Oc3ccc[n+](C)c3)c(Oc3ccc[n+](C)<br>c3)cc52)c1 |
| Name:       | Cationic Water-Soluble Phthalocyanine<br>Derivative 15                                                                                                                                                                                                                                                                          |
| Method:     | Fluorescence Microscopy                                                                                                                                                                                                                                                                                                         |
| References: | 353                                                                                                                                                                                                                                                                                                                             |
| Structure:  | COCCOCCOCC[n+]<br>1cccc(Oc2cc3C4\C=C5/<br>N=C(/C=C6\NH+])7\C(=C/C8=N\C(=C\C([N                                                                                                                                                                                                                                                  |



|             |                                                                                                                                                                             |
|-------------|-----------------------------------------------------------------------------------------------------------------------------------------------------------------------------|
|             | <chem>])=O)C([O-]=O)c(Oc6cc(cc(c6)C([O-])=O)C([O-])=O)cc45)c3cc2Oc2cc(cc(c2)C([O-])=O)C([O-]=O)cc(c1)C([O-]=O</chem>                                                        |
| Name:       | Porphyrin-Peptide Conjugate 1A                                                                                                                                              |
| Method:     | Fluorescence Microscopy                                                                                                                                                     |
| References: | 387                                                                                                                                                                         |
| Structure:  | <chem>Nc1ccc(cc1)-c1c2ccc(n2)c(-c2ccccc2)c2ccc([nH]2)c(-c2ccccc2)c2ccc(n2)c(-c2ccccc2)c2ccc1[nH]2</chem>                                                                    |
| Name:       | Porphyrin-Peptide Conjugate 5A                                                                                                                                              |
| Method:     | Fluorescence Microscopy                                                                                                                                                     |
| References: | 387                                                                                                                                                                         |
| Structure:  | <chem>S=C=Nc1ccc(cc1)-c1c2ccc(n2)c(-c2ccccc2)c2ccc([nH]2)c(-c2ccccc2)c2ccc(n2)c(-c2ccccc2)c2ccc1[nH]2</chem>                                                                |
| Name:       | Porphyrin-Peptide Conjugate 13A                                                                                                                                             |
| Method:     | Fluorescence Microscopy                                                                                                                                                     |
| References: | 387                                                                                                                                                                         |
| Structure:  | <chem>[NH3+]CCCCC(NC(=S)Nc1ccc(cc1)-c1c2ccc(n2)c(-c2ccccc2)c2ccc([nH]2)c(-c2ccccc2)c2ccc(n2)c(-c2ccccc2)c2ccc1[nH]2)C([O-])=O</chem>                                        |
| Name:       | Porphyrin-Peptide Conjugate 14A                                                                                                                                             |
| Method:     | Fluorescence Microscopy                                                                                                                                                     |
| References: | 387                                                                                                                                                                         |
| Structure:  | <chem>[NH3+]CCCCC(NC(=O)C(CCCC[NH3+])N C(=S)Nc1ccc(cc1)-c1c2ccc(n2)c(-c2ccccc2)c2ccc([nH]2)c(-c2ccccc2)c2ccc(n2)c(-c2ccccc2)c2ccc1[nH]2)C([O-])=O</chem>                    |
| Name:       | Porphyrin-Peptide Conjugate 15A                                                                                                                                             |
| Method:     | Fluorescence Microscopy                                                                                                                                                     |
| References: | 387                                                                                                                                                                         |
| Structure:  | <chem>[NH3+]CCCCC(NC(=O)C(CCCC[NH3+])N C(=O)C(CCCC[NH3+])NC(=S)Nc1ccc(cc1)-c1c2ccc(n2)c(-c2ccccc2)c2ccc([nH]2)c(-c2ccccc2)c2ccc(n2)c(-c2ccccc2)c2ccc1[nH]2)C([O-])=O</chem> |
| Name:       | Porphyrin-Peptide Conjugate 16A                                                                                                                                             |
| Method:     | Fluorescence Microscopy                                                                                                                                                     |
| References: | 387                                                                                                                                                                         |
| Structure:  | <chem>[NH3+]CCCCC(NC(=O)CCCC(=O)Nc1ccc(cc1)-c1c2ccc(n2)c(-c2ccccc2)c2ccc([nH]2)c(-c2ccccc2)c2ccc(n2)c(-c2ccccc2)c2ccc1[nH]2)C([O-])=O</chem>                                |
| Name:       | Porphyrin-Peptide Conjugate 17A                                                                                                                                             |
| Method:     | Fluorescence Microscopy                                                                                                                                                     |
| References: | 387                                                                                                                                                                         |
| Structure:  | <chem>[NH3+]CCCCC(NC(=O)C(CCCC[NH3+])N C(=O)CCCC(=O)Nc1ccc(cc1)-c1c2ccc(n2)c(-c2ccccc2)c2ccc([nH]2)c(-c2ccccc2)c2ccc(n2)c(-c2ccccc2)c2ccc1[nH]2)C([O-])=O</chem>            |

|             |                                                                                                                                                                                                           |
|-------------|-----------------------------------------------------------------------------------------------------------------------------------------------------------------------------------------------------------|
| Name:       | Porphyrin-Peptide Conjugate 18A                                                                                                                                                                           |
| Method:     | Fluorescence Microscopy                                                                                                                                                                                   |
| References: | 387                                                                                                                                                                                                       |
| Structure:  | <chem>[NH3+]CCCCC(NC(=O)C(CCCC[NH3+])N C(=O)C(CCCC[NH3+])NC(=O)CCCC(=O)Nc1ccc(cc1)-c1c2ccc(n2)c(-c2ccccc2)c2ccc([nH]2)c(-c2ccccc2)c2ccc(n2)c(-c2ccccc2)c2ccc1[nH]2)C([O-])=O</chem>                       |
| Name:       | Porphyrin-Peptide Conjugate 19A                                                                                                                                                                           |
| Method:     | Fluorescence Microscopy                                                                                                                                                                                   |
| References: | 387                                                                                                                                                                                                       |
| Structure:  | <chem>[NH3+]CCCCC(NC(=O)C(CCCC[NH3+])N C(=O)C(CCCC[NH3+])NC(=O)CCCC(=O)Nc1ccc(cc1)-c1c2ccc(n2)c(-c2ccccc2)c2ccc3c(-c4ccccc4)c4ccc(n4)c(-c4ccccc4)c4ccc1n4[Zn](n23)C([O-])=O</chem>                        |
| Name:       | Porphyrin-Peptide Conjugate 20A                                                                                                                                                                           |
| Method:     | Fluorescence Microscopy                                                                                                                                                                                   |
| References: | 387                                                                                                                                                                                                       |
| Structure:  | <chem>[NH3+]CCCCC(NC(=O)C(CCCC[NH3+])N C(=O)C(CCCC[NH3+])NC(=O)CCCC(=O)Nc1ccc(cc1)-c1c2ccc3c(-c4ccccc4)c4ccc5c(-c6ccccc6)c6ccc7c(-c8ccccc8)c8ccc1[n+]8[Sn@](n67)(n23)[n+]45)C([O-])=O</chem>              |
| Name:       | Porphyrin-Peptide Conjugate 21A                                                                                                                                                                           |
| Method:     | Fluorescence Microscopy                                                                                                                                                                                   |
| References: | 387                                                                                                                                                                                                       |
| Structure:  | <chem>NC(=[NH2+])NCCCC(NC(=O)C(CCCC[NH3+])NC(=O)C(CCCNC(N)=[NH2+])NC(=O)C(CCCNC(N)=[NH2+])NC(=S)Nc1ccc(cc1)-c1c2ccc(n2)c(-c2ccccc2)c2ccc([nH]2)c(-c2ccccc2)c2ccc(n2)c(-c2ccccc2)c2ccc1[nH]2)C(N)=O</chem> |
| Name:       | Porphyrin-Peptide Conjugate 22A                                                                                                                                                                           |
| Method:     | Fluorescence Microscopy                                                                                                                                                                                   |
| References: | 387                                                                                                                                                                                                       |
| Structure:  | <chem>NC(=O)C(CCCC[NH3+])NC(=O)C(CCCC[NH3+])NC(=O)C(CCCC[NH3+])NC(=O)C(CCCC[NH3+])NC(=O)CCC C(=O)Nc1ccc(cc1)-c1c2ccc(n2)c(-c2ccccc2)c2ccc([nH]2)c(-c2ccccc2)c2ccc(n2)c(-c2ccccc2)c2ccc1[nH]2</chem>       |
| Name:       | Porphyrin-Peptide Conjugate 23A                                                                                                                                                                           |
| Method:     | Fluorescence Microscopy                                                                                                                                                                                   |
| References: | 387                                                                                                                                                                                                       |
| Structure:  | <chem>NC(=[NH2+])NCCCC(NC(=O)C(CCCNC(N)=[NH2+])NC(=O)C(CCCNC(N)=[NH2+])NC(=O)CCCC(=O)Nc1ccc(cc1)-c1c2ccc(n2)c(-c2ccccc2)c2ccc([nH]2)c(-c2ccccc2)c2ccc(n2)c(-c2ccccc2)c2ccc1[nH]2)C(N)=O</chem>            |
| Name:       | Porphyrin-Peptide Conjugate 24A                                                                                                                                                                           |
| Method:     | Fluorescence Microscopy                                                                                                                                                                                   |

|             |                                                                                                                                                                                                                   |
|-------------|-------------------------------------------------------------------------------------------------------------------------------------------------------------------------------------------------------------------|
| References: | 387                                                                                                                                                                                                               |
| Structure:  | <chem>NC(=[NH2+])NCCCC(NC(=O)C(CCCNC(N)=[NH2+])NC(=O)C(CCCNC(N)=[NH2+])NC(=O)C(CCCC[NH3+])NC(=O)CCCC(=O)Nc1ccc(cc1)-c1c2ccc(n2)c(-c2ccccc2)c2ccc([nH]2)c(-c2ccccc2)c2ccc(n2)c(-c2ccccc2)c2ccc1[nH]2)C(N)=O</chem> |
| Name:       | Porphyrin-Peptide Conjugate 25A                                                                                                                                                                                   |
| Method:     | Fluorescence Microscopy                                                                                                                                                                                           |
| References: | 387                                                                                                                                                                                                               |
| Structure:  | <chem>NC(=[NH2+])NCCCC(NC(=O)C(CCCC[NH3+])NC(=O)C(CCCNC(N)=[NH2+])NC(=O)C(CCCNC(N)=[NH2+])NC(=O)CCCC(=O)Nc1ccc(cc1)-c1c2ccc(n2)c(-c2ccccc2)c2ccc([nH]2)c(-c2ccccc2)c2ccc(n2)c(-c2ccccc2)c2ccc1[nH]2)C(N)=O</chem> |
| Name:       | Saponin Derivative 1a                                                                                                                                                                                             |
| Method:     | Fluorescence Microscopy                                                                                                                                                                                           |
| References: | 421                                                                                                                                                                                                               |
| Structure:  | <chem>CC1CCC2(OC1)OC1CC3C4CCC5CC(CCC5(C)C4CCC3(C)C1C2C)OC1OC(CO)C(OC2OC(C)C(OCCNS(=C)(=C)c3ccccc4c(cccc34)N(C)C)C(O)C2O)C(O)C1OC1OC(C)C(O)C(O)C1O</chem>                                                          |
| Name:       | Saponin Derivative 1b                                                                                                                                                                                             |
| Method:     | Fluorescence Microscopy                                                                                                                                                                                           |
| References: | 421                                                                                                                                                                                                               |
| Structure:  | <chem>CC1CCC2(OC1)OC1CC3C4CCC5CC(CCC5(C)C4CCC3(C)C1C2C)OC1OC(CO)C(OC2OC(C)C(OCCNC(=S)Nc3ccc4c(c3)C(=O)OC43c4ccc(C)cc4Oc4cc(C)ccc34)C(O)C2O)C(O)C1OC1OC(C)C(O)C(O)C1O</chem>                                       |
| Name:       | Saponin Derivative 2                                                                                                                                                                                              |
| Method:     | Fluorescence Microscopy                                                                                                                                                                                           |
| References: | 421                                                                                                                                                                                                               |
| Structure:  | <chem>CC1CCC2(OC1)OC1CC3C4CCC5CC(CCC5(C)C4CCC3(C)C1C2C)OC1OC(C)C(OC2OC(C)C(ONS(=C)(=C)c3ccccc4c(cccc34)N(C)C)C(O)C2O)C(O)C1OC1OC(C)C(O)C(O)C1O</chem>                                                             |
| Name:       | Saponin Derivative 3                                                                                                                                                                                              |
| Method:     | Fluorescence Microscopy                                                                                                                                                                                           |
| References: | 421                                                                                                                                                                                                               |
| Structure:  | <chem>CC(C)CCCC(C)C1CCC2C3CCC4CC(CCC4(C)C3CCC12C)OC1OC(CO)C(OC2OC(C)C(OCCNS(=C)(=C)c3ccccc4c(cccc34)N(C)C)C(O)C2O)C(O)C1OC1OC(C)C(O)C(O)C1O</chem>                                                                |
| Name:       | Iejimalide Derivative 8                                                                                                                                                                                           |
| Method:     | Fluorescence Microscopy                                                                                                                                                                                           |
| References: | 423                                                                                                                                                                                                               |
| Structure:  | <chem>CCN(CC)c1ccc2C=C(NC(=O)Oc3ccccc3)C(=O)Oc2c1</chem>                                                                                                                                                          |
| Name:       | Glucosylated Si(IV) Phthalocyanine                                                                                                                                                                                |

|             |                                                                                                                                                                                                                                                                                                                                                                       |
|-------------|-----------------------------------------------------------------------------------------------------------------------------------------------------------------------------------------------------------------------------------------------------------------------------------------------------------------------------------------------------------------------|
|             | Derivative 3                                                                                                                                                                                                                                                                                                                                                          |
| Method:     | Fluorescence Microscopy                                                                                                                                                                                                                                                                                                                                               |
| References: | 427                                                                                                                                                                                                                                                                                                                                                                   |
| Structure:  | <chem>CC1(C)OCC(O1)C1OC2OC(C)(C)OC2C1OCCOCCOCCO[Si]1(OCCOCCOCCOCCOC2C(OC3OC(C)(C)OC23)C2COC(C)(C)O2)n2c3cc4nc(cc5n1c(cc1nc(cc2c2ccccc32)c2ccc12)c1ccccc51)c1ccccc41</chem>                                                                                                                                                                                            |
| Name:       | Subphthalocyanine Derivative 2                                                                                                                                                                                                                                                                                                                                        |
| Method:     | Fluorescence Microscopy                                                                                                                                                                                                                                                                                                                                               |
| References: | 428                                                                                                                                                                                                                                                                                                                                                                   |
| Structure:  | <chem>OCCOCCOCCOB1N2C3\N=C4/N=C(/N=C5\N1C(N=C2c1ccccc31)c1ccccc51)c1ccccc41</chem>                                                                                                                                                                                                                                                                                    |
| Name:       | Subphthalocyanine Derivative 3                                                                                                                                                                                                                                                                                                                                        |
| Method:     | Fluorescence Microscopy                                                                                                                                                                                                                                                                                                                                               |
| References: | 428                                                                                                                                                                                                                                                                                                                                                                   |
| Structure:  | <chem>OCCOCCOCCOCCOB1N2C3\N=C4/N=C(/N=C5\N1C(N=C2c1ccccc31)c1ccccc51)c1ccc cc41</chem>                                                                                                                                                                                                                                                                                |
| Name:       | Subphthalocyanine Derivative 4                                                                                                                                                                                                                                                                                                                                        |
| Method:     | Fluorescence Microscopy                                                                                                                                                                                                                                                                                                                                               |
| References: | 428                                                                                                                                                                                                                                                                                                                                                                   |
| Structure:  | <chem>COCCOCCOc1ccc(OB2N3C4\N=C5/N=C(/N=C6\N2C(N=C3c2ccccc42)c2ccccc62)c2ccc c52)cc1</chem>                                                                                                                                                                                                                                                                           |
| Name:       | Subphthalocyanine Derivative 5                                                                                                                                                                                                                                                                                                                                        |
| Method:     | Fluorescence Microscopy                                                                                                                                                                                                                                                                                                                                               |
| References: | 428                                                                                                                                                                                                                                                                                                                                                                   |
| Structure:  | <chem>COCCOCCOCCOc1ccc(OB2N3C4\N=C5/N=C(/N=C6\N2C(N=C3c2ccccc42)c2ccccc62)c2ccc c52)cc1</chem>                                                                                                                                                                                                                                                                        |
| Name:       | Porphyrin-Bile Acid Conjugate 1                                                                                                                                                                                                                                                                                                                                       |
| Method:     | Fluorescence Microscopy                                                                                                                                                                                                                                                                                                                                               |
| References: | 439                                                                                                                                                                                                                                                                                                                                                                   |
| Structure:  | <chem>CC(CCC(=O)NCC[N+](C)(C)c1ccc(cc1)-c1c2ccc(n2)c(-c2ccc(cc2)[N+](C)(C)CCNC(=O)CCC(C)C2CCC3C4C(O)CC5CC(O)CCC5(C)C4CC(O)C23C)c2ccc([nH]2)c(-c2ccc(cc2)[N+](C)(C)CCNC(=O)CCC(C)C2CCC3C4C(O)CC5CC(O)CCC5(C)C4CC(O)C23C)c2ccc(n2)c(-c2ccc(cc2)[N+](C)(C)CCNC(=O)CCC(C)C2CCC3C4C(O)CC5CC(O)CCC5(C)C4CC(O)C23C)c2ccc1[nH]2)C1CCC2C3C(O)CC4CC(O)CCC4(C)C3CC(O)C12C</chem> |
| Name:       | Porphyrin-Bile Acid Conjugate 2                                                                                                                                                                                                                                                                                                                                       |
| Method:     | Fluorescence Microscopy                                                                                                                                                                                                                                                                                                                                               |
| References: | 439                                                                                                                                                                                                                                                                                                                                                                   |
| Structure:  | <chem>CC(CCC(=O)NCC[N+](C)(C)c1ccccc1)-c1c2ccc(n2)c(-c2ccccc2)[N+](C)(C)CCNC(=O)CCC(C)C2CCC3C4C(O)CC5CC(O)CCC5(C)C4CC(O)C23C)c2ccc([nH]2)c(-c2ccccc2)[N+](C)(C)CCNC(=O)CCC(C)C2</chem>                                                                                                                                                                                |

|             |                                                                                                                                                                                                                                                                                                                                                                           |
|-------------|---------------------------------------------------------------------------------------------------------------------------------------------------------------------------------------------------------------------------------------------------------------------------------------------------------------------------------------------------------------------------|
|             | <chem>CCC3C4C(O)CC5CC(O)CCC5(C)C4CC(O)C23C)c2ccc(n2)c(-c2cccc(c2)[N+](C)(C)CCNC(=O)CCC(C)C2CCC3C4C(O)CC5CC(O)CCC5(C)C4CC(O)C23C)c2ccc1[nH]2)C1CCC2C3C(O)CC4CC(O)CCC4(C)C3CC(O)C12C</chem>                                                                                                                                                                                 |
| Name:       | Porphyrin-Bile Acid Conjugate 3                                                                                                                                                                                                                                                                                                                                           |
| Method:     | Fluorescence Microscopy                                                                                                                                                                                                                                                                                                                                                   |
| References: | 439                                                                                                                                                                                                                                                                                                                                                                       |
| Structure:  | <chem>CC(CCC(=O)NCCC[N+](C)(C)c1cccc(c1)-c1c2ccc(n2)c(-c2ccc(cc2)[N+](C)(C)CCCNC(=O)CCC(C)C2CCC3C4C(O)CC5CC(O)CCC5(C)C4CC(O)C23C)c2ccc([nH]2)c(-c2ccc(cc2)[N+](C)(C)CCCNC(=O)CCC(C)C2CCC3C4C(O)CC5CC(O)CCC5(C)C4CC(O)C23C)c2ccc(n2)c(-c2ccc(cc2)[N+](C)(C)CCCNC(=O)CCC(C)C2CCC3C4C(O)CC5CC(O)CCC5(C)C4CC(O)C23C)c2ccc1[nH]2)C1CCC2C3C(O)CC4CC(O)CCC4(C)C3CC(O)C12C</chem> |
| Name:       | Porphyrin-Bile Acid Conjugate 4                                                                                                                                                                                                                                                                                                                                           |
| Method:     | Fluorescence Microscopy                                                                                                                                                                                                                                                                                                                                                   |
| References: | 439                                                                                                                                                                                                                                                                                                                                                                       |
| Structure:  | <chem>CC(CCC(=O)NCCC[N+](C)(C)c1cccc(c1)-c1c2ccc(n2)c(-c2cccc(c2)[N+](C)(C)CCCNC(=O)CCC(C)C2CCC3C4C(O)CC5CC(O)CCC5(C)C4CC(O)C23C)c2ccc([nH]2)c(-c2cccc(c2)[N+](C)(C)CCCNC(=O)CCC(C)C2CCC3C4C(O)CC5CC(O)CCC5(C)C4CC(O)C23C)c2ccc(n2)c(-c2cccc(c2)[N+](C)(C)CCCNC(=O)CCC(C)C2CCC3C4C(O)CC5CC(O)CCC5(C)C4CC(O)C23C)c2ccc1[nH]2)C1CCC2C3C(O)CC4CC(O)CCC4(C)C3CC(O)C12C</chem> |
| Name:       | Si(IV) Phthalocyanine analogue 1                                                                                                                                                                                                                                                                                                                                          |
| Method:     | Fluorescence Microscopy                                                                                                                                                                                                                                                                                                                                                   |
| References: | 538                                                                                                                                                                                                                                                                                                                                                                       |
| Structure:  | <chem>Clc1cc2c3nc(nc4n5c(nc6nc(nc7n(c(n3)c3cc(C1)c(Cl)cc73)[Si]5(Cl)Cl)c3cc(Cl)c(Cl)cc63)c3cc(Cl)c(Cl)cc43)c2cc1Cl</chem>                                                                                                                                                                                                                                                 |
| Name:       | Oregon-Green-RNase A Conjugate                                                                                                                                                                                                                                                                                                                                            |
| Method:     | Fluorescence Microscopy                                                                                                                                                                                                                                                                                                                                                   |
| References: | 449                                                                                                                                                                                                                                                                                                                                                                       |
| Structure:  | <chem>CC(=O)Oc1cc(C)cc(C)c1C(C)(C)CC(=O)Nc1ccc2c(Oc3cc(NC(=O)NCCC4C(=O)C=CC4=O)ccc3C22OC(=O)c3cccc23)c1</chem>                                                                                                                                                                                                                                                            |
| Name:       | Rhodamine-Riboflavin                                                                                                                                                                                                                                                                                                                                                      |
| Method:     | Fluorescence Microscopy                                                                                                                                                                                                                                                                                                                                                   |
| References: | 539                                                                                                                                                                                                                                                                                                                                                                       |
| Structure:  | <chem>CN(C)c1ccc2c(OC3=CC(C=CC3=C2c2ccc(N)cc2C([O-])=O)=[N+](C)C)c1</chem>                                                                                                                                                                                                                                                                                                |
| Name:       | FG-H503                                                                                                                                                                                                                                                                                                                                                                   |
| Method:     | Fluorescence Microscopy                                                                                                                                                                                                                                                                                                                                                   |

|             |                                                                                         |
|-------------|-----------------------------------------------------------------------------------------|
| References: | 500                                                                                     |
| Structure:  | <chem>CC(C)C1[NH2+]CC2=C3C=CC=CC3=C(C[ NH2+]C(C(C)C)C(=O)NCCCNC1=O)C1=C2 C=CC=C1</chem> |
| Name:       | Chlorpromazine                                                                          |
| Method:     | Pharmacological Effect                                                                  |
| References: | 512                                                                                     |
| Structure:  | <chem>C[NH+](C)CCCN1C2=CC=CC=C2SC2=C1C =C(Cl)C=C2</chem>                                |
| Name:       | Lidocaine                                                                               |
| Method:     | Pharmacological Effect                                                                  |
| References: | 229                                                                                     |
| Structure:  | <chem>CNC(=O)OC1=CC=C2N(C)[C@H]3N(C)CC [C@@]3(C)C2=C1</chem>                            |
| Name:       | Eserine                                                                                 |
| Method:     | Pharmacological Effect                                                                  |
| References: | 229                                                                                     |
| Structure:  | <chem>C[NH+](C)CC1=CC=CC=C1</chem>                                                      |
| Name:       | Procaine                                                                                |
| Method:     | Pharmacological Effect                                                                  |
| References: | 229                                                                                     |
| Structure:  | <chem>CC[NH+](CC)CCOC(=O)C1=CC=C(N)C=C 1</chem>                                         |
| Name:       | N,N-dimethyl-benzylamine                                                                |
| Method:     | Pharmacological Effect                                                                  |
| References: | 229                                                                                     |
| Structure:  | <chem>CNC(=O)OC1=CC2=C(C=C1)N(C)C1N(C)C CC21C</chem>                                    |
| Name:       | 4-Aminopyridine                                                                         |
| Method:     | Pharmacological Effect                                                                  |
| References: | 229                                                                                     |
| Structure:  | <chem>NC1=CC=[NH+]C=C1</chem>                                                           |
| Name:       | 4-Aminoquinaldine                                                                       |
| Method:     | Pharmacological Effect                                                                  |
| References: | 229                                                                                     |
| Structure:  | <chem>CC1=[NH+]C2=C(C=CC=C2)C(N)=C1</chem>                                              |
| Name:       | Ephedrine                                                                               |
| Method:     | Pharmacological Effect                                                                  |
| References: | 229                                                                                     |
| Structure:  | <chem>C[NH2+]C(C)C(O)C1=CC=CC=C1</chem>                                                 |
| Name:       | 4-Dimethylaminopyridine                                                                 |
| Method:     | Pharmacological Effect                                                                  |
| References: | 229                                                                                     |
| Structure:  | <chem>CN(C)C1=CC=[NH+]C=C1</chem>                                                       |
| Name:       | Atropine                                                                                |
| Method:     | Pharmacological Effect                                                                  |
| References: | 229                                                                                     |
| Structure:  | <chem>C[NH+]1C2CCC1CC(C2)OC(=O)C(CO)C1= CC=CC=C1</chem>                                 |

|             |                                          |
|-------------|------------------------------------------|
| Name:       | Mecamylamine                             |
| Method:     | Pharmacological Effect                   |
| References: | 229                                      |
| Structure:  | <chem>C[NH2+]C1(C)C2CCC(C2)C1(C)C</chem> |
| Name:       | Pilocarpine                              |
| Method:     | Pharmacological Effect                   |
| References: | 229                                      |
| Structure:  | <chem>CCC1C(COC1=O)CC1=CN=CN1C</chem>    |
| Name:       | Nicotine                                 |
| Method:     | Pharmacological Effect                   |
| References: | 229                                      |
| Structure:  | <chem>C[NH+]1CCCC1C1=CN=CC=C1</chem>     |
| Name:       | Morpholine                               |
| Method:     | Pharmacological Effect                   |
| References: | 229                                      |
| Structure:  | <chem>C1COCC[NH2+]1</chem>               |
| Name:       | Tetramethylethylenediamine               |
| Method:     | Pharmacological Effect                   |
| References: | 229                                      |
| Structure:  | <chem>CN(C)CC[NH+](C)C</chem>            |
| Name:       | Piperazine                               |
| Method:     | Pharmacological Effect                   |
| References: | 229                                      |
| Structure:  | <chem>C1C[NH2+]CCN1</chem>               |
| Name:       | Putrescine                               |
| Method:     | Pharmacological Effect                   |
| References: | 229                                      |
| Structure:  | <chem>[NH3+]CCCC[NH3+]</chem>            |
| Name:       | Piperidine                               |

|             |                                                                                                                                                                                                                       |
|-------------|-----------------------------------------------------------------------------------------------------------------------------------------------------------------------------------------------------------------------|
| Method:     | Pharmacological Effect                                                                                                                                                                                                |
| References: | 229                                                                                                                                                                                                                   |
| Structure:  | <chem>C1CC[NH2+]CC1</chem>                                                                                                                                                                                            |
| Name:       | Desipramine                                                                                                                                                                                                           |
| Method:     | Uptake/Binding                                                                                                                                                                                                        |
| References: | 705                                                                                                                                                                                                                   |
| Structure:  | <chem>C[NH2+]CCCN1C2=CC=CC=C2CCC2=CC=CC=C12</chem>                                                                                                                                                                    |
| Name:       | Ciprofloxacin                                                                                                                                                                                                         |
| Method:     | Fluorescence Microscopy                                                                                                                                                                                               |
| References: | 97                                                                                                                                                                                                                    |
| Structure:  | <chem>[O-]C(=O)C1=CN(C2CC2)C2=C(C=C(F)C(=C2)N2CC[NH2+]CC2)C1=O</chem>                                                                                                                                                 |
| Name:       | 6'-O-lissamine-rhodamine B-glucosamine                                                                                                                                                                                |
| Method:     | Fluorescence Microscopy                                                                                                                                                                                               |
| References: | 713                                                                                                                                                                                                                   |
| Structure:  | <chem>CCN(CC)C1=CC2=C(C=C1)C(C1=CC(=CC(=C1)[S-])(=O)=O)S(=O)(=O)OCC1OC(O)C([NH3+])C(O)C1O)=C1C=C/C(/C=C1O2)=[N+]/(CC)CC</chem>                                                                                        |
| Name:       | Suramin                                                                                                                                                                                                               |
| Method:     | Pharmacological Effect                                                                                                                                                                                                |
| References: | 730                                                                                                                                                                                                                   |
| Structure:  | <chem>CC1=C(NC(=O)C2=CC(NC(=O)NC3=CC=C(C(=C3)C(=O)NC3=C(C)C=CC(=C3)C(=O)NC3=C4C(=CC(=CC4=C(C=C3)S(O)(=O)=O)S(O)(=O)=O)S(O)(=O)=O)=CC=C2)C=C(C=C1)C(=O)NC1=C2C(=CC(=CC2=C(C=C1)S(O)(=O)=O)S(O)(=O)=O)S(O)(=O)=O</chem> |

**Supplemental Table 2: The chemical compounds with reported subcellular localization site in the mitochondrion.** References information is available in Supplemental Table 10. Structure is presented as the *Simplified Molecular Input Line Entry Specification string of the major microspecies at pH 7.4, as calculated by ChemAxon.*

|             |                                     |             |                                                          |
|-------------|-------------------------------------|-------------|----------------------------------------------------------|
| Name:       | Valproic acid                       | Structure:  | Cc1c2ccncc2c(C)c2c3ccccc3[nH]c12                         |
| Method:     | Uptake/Binding                      | Name:       | Meperidine                                               |
| References: | 4, 714                              | Method:     | Pharmacological Effect                                   |
| Structure:  | CCCC(CCC)C([O-])=O                  | References: | 4                                                        |
| Name:       | Menadione                           | Structure:  | CCOC(=O)C1(CC[NH+](C)CC1)c1ccccc1                        |
| Method:     | Pharmacological Effect              | Name:       | Amytal                                                   |
| References: | 4, 715                              | Method:     | Pharmacological Effect                                   |
| Structure:  | CC1=CC(=O)c2ccccc2C1=O              | References: | 4                                                        |
| Name:       | Aspirin                             | Structure:  | CCC1(CCC(C)C)C(=O)NC(=O)NC1=O                            |
| Method:     | Pharmacological Effect              | Name:       | DASPEI; (2-(4-(dimethylamino)styryl)-1-methyl pyridinium |
| References: | 4                                   | Method:     | Fluorescence Microscopy                                  |
| Structure:  | CC(=O)Oc1ccccc1C([O-])=O            | References: | 4, 75                                                    |
| Name:       | Paraquat                            | Structure:  | CC[n+]1ccccc1\C=C\c1ccc(cc1)N(C)C                        |
| Method:     | Pharmacological Effect              | Name:       | FCCP                                                     |
| References: | 4                                   | Method:     | Uptake/Binding                                           |
| Structure:  | C[n+]1ccc(cc1)-c1cc[n+](C)cc1       | References: | 4, 716                                                   |
| Name:       | CCCP                                | Structure:  | FC(F)(F)Oc1ccc(NN=C(C#N)C#N)cc1                          |
| Method:     | Pharmacological Effect              | Name:       | Trichlorophenoxyacetic acid                              |
| References: | 4, 717                              | Method:     | Pharmacological Effect                                   |
| Structure:  | Clc1cccc(NN=C(C#N)C#N)c1            | References: | 4                                                        |
| Name:       | Clofibric acid                      | Structure:  | [O-]C(=O)COc1c(Cl)cc(Cl)cc1Cl                            |
| Method:     | Pharmacological Effect              | Name:       | Zidovudine                                               |
| References: | 4                                   | Method:     | Uptake/Binding                                           |
| Structure:  | CC(C)(Oc1ccc(Cl)cc1)C([O-])=O       | References: | 4, 230                                                   |
| Name:       | Nonylphenol                         | Structure:  | CC1=CN(C2CC(N=[N+]=[N-])C(CO)O2)C(=O)NC1=O               |
| Method:     | Pharmacological Effect              | Name:       | Diethylstilbestrol                                       |
| References: | 4                                   | Method:     | Pharmacological Effect                                   |
| Structure:  | CCCCCCCCc1ccccc1O                   | References: | 4                                                        |
| Name:       | 2-methylharmine                     | Structure:  | CC\C(c1ccc(O)cc1)=C(/CC)c1ccc(O)cc1                      |
| Method:     | Pharmacological Effect              | Name:       | Vacor                                                    |
| References: | 4                                   | Method:     | Pharmacological Effect                                   |
| Structure:  | COC1=CC2=NC3=C(C)N(C)C=CC3=C2C=C1   | References: | 4                                                        |
| Name:       | Nalidixic acid                      | Structure:  | O=C(NCc1ccncc1)Nc1ccc(cc1)N(=O)=O                        |
| Method:     | Pharmacological Effect              | Name:       | Methyltriphenylphosphonium                               |
| References: | 4                                   | Method:     | Cell Fractionation                                       |
| Structure:  | CCN1C=C(C([O-])=O)C(=O)c2ccc(C)nc12 | References: | 4, 25, 26                                                |
| Name:       | Ellipticine                         | Structure:  | C[P+](c1ccccc1)(c1ccccc1)c1ccccc1                        |
| Method:     | Pharmacological Effect              |             |                                                          |
| References: | 4                                   |             |                                                          |

|             |                                                           |
|-------------|-----------------------------------------------------------|
| Name:       | Imipramine                                                |
| Method:     | Cell Fractionation                                        |
| References: | 264                                                       |
| Structure:  | <chem>C[NH+](C)CCCN1c2ccccc2CCc2ccccc12</chem>            |
| Name:       | Rhein                                                     |
| Method:     | Pharmacological Effect                                    |
| References: | 4                                                         |
| Structure:  | <chem>Oc1cccc2C(=O)c3cc(cc(O)c3C(=O)c12)C([O-])=O</chem>  |
| Name:       | Diazepam                                                  |
| Method:     | Pharmacological Effect                                    |
| References: | 4, 6                                                      |
| Structure:  | <chem>CN1C(=O)CN=C(c2ccccc2)c2cc(Cl)ccc12</chem>          |
| Name:       | Ciprofibrate                                              |
| Method:     | Pharmacological Effect                                    |
| References: | 4                                                         |
| Structure:  | <chem>CC(C)(Oc1ccc(cc1)C1CC1(Cl)Cl)C([O-])=O</chem>       |
| Name:       | Nitroxinil; Nitroxynil                                    |
| Method:     | Pharmacological Effect                                    |
| References: | 4                                                         |
| Structure:  | <chem>[O-]c1c(I)cc(cc1N(=O)=O)C#N</chem>                  |
| Name:       | Diclofenac                                                |
| Method:     | Pharmacological Effect                                    |
| References: | 4                                                         |
| Structure:  | <chem>[O-]C(=O)Cc1ccccc1Nc1c(Cl)cccc1Cl</chem>            |
| Name:       | Pyronine; Pyronin Y                                       |
| Method:     | Fluorescence Microscopy                                   |
| References: | 4, 185, 708                                               |
| Structure:  | <chem>CN(C)c1ccc2C=C3C=CC(C=C3Oc2c1)=[N+](C)C</chem>      |
| Name:       | Nimesulide                                                |
| Method:     | Pharmacological Effect                                    |
| References: | 4                                                         |
| Structure:  | <chem>CS([O-])(=O)=Nc1ccc(cc1Oc1ccccc1)N(=O)=O</chem>     |
| Name:       | TBTP (Thiobutyltriphenylphosphonium bromide)              |
| Method:     | Uptake/Binding                                            |
| References: | 4, 37                                                     |
| Structure:  | <chem>SCCCC[P+](c1ccccc1)(c1ccccc1)c1ccccc1</chem>        |
| Name:       | Amquinat                                                  |
| Method:     | Pharmacological Effect                                    |
| References: | 4                                                         |
| Structure:  | <chem>CCCc1cc2C(=O)C(=C[N-]c2cc1N(CC)CC)C(=O)OC</chem>    |
| Name:       | Safranin O                                                |
| Method:     | Pharmacological Effect                                    |
| References: | 4                                                         |
| Structure:  | <chem>Cc1cc2nc3cc(C)c(N)cc3[n+](c1-c3ccccc3)c2cc1N</chem> |

|             |                                                                 |
|-------------|-----------------------------------------------------------------|
| Name:       | Chlorpromazine                                                  |
| Method:     | histo                                                           |
| References: | 4, 5, 6, 8, 58, 510                                             |
| Structure:  | <chem>C[NH+](C)CCCN1c2ccccc2Sc2ccc(Cl)cc12</chem>               |
| Name:       | Dichlorodiphenyldichloroethane (DDD)                            |
| Method:     | Pharmacological Effect                                          |
| References: | 4                                                               |
| Structure:  | <chem>ClC(Cl)C(c1ccc(Cl)cc1)c1ccccc1Cl</chem>                   |
| Name:       | Lonidamine                                                      |
| Method:     | Pharmacological Effect                                          |
| References: | 4                                                               |
| Structure:  | <chem>[O-]C(=O)c1nn(Cc2ccc(Cl)cc2Cl)c2ccccc12</chem>            |
| Name:       | MPCU                                                            |
| Method:     | Uptake/Binding                                                  |
| References: | 4, 106                                                          |
| Structure:  | <chem>Cc1ccc(cc1)S([O-])(=O)=NC(=O)Nc1ccc(Cl)cc1</chem>         |
| Name:       | Tebufenpyrad                                                    |
| Method:     | Pharmacological Effect                                          |
| References: | 4, 527                                                          |
| Structure:  | <chem>CCc1nn(C)c(C(=O)NCc2ccc(cc2)C(C)(C)C)c1Cl</chem>          |
| Name:       | UHDBT                                                           |
| Method:     | Pharmacological Effect                                          |
| References: | 4                                                               |
| Structure:  | <chem>CCCCCCCCCCCC1=C([O-])c2ncsc2C(=O)C1=O</chem>              |
| Name:       | Tetraphenylphosphonium                                          |
| Method:     | Pharmacological Effect                                          |
| References: | 4                                                               |
| Structure:  | <chem>c1ccc(cc1)[P+](c1ccccc1)(c1ccccc1)c1ccccc1</chem>         |
| Name:       | Pentamidine                                                     |
| Method:     | Pharmacological Effect                                          |
| References: | 4                                                               |
| Structure:  | <chem>NC(=[NH2+])c1ccc(OCCCCCOc2ccc(cc2)C(N)=[NH2+])cc1</chem>  |
| Name:       | D632; dihydrorhodamine 123                                      |
| Method:     | Fluorescence Microscopy                                         |
| References: | 594, 601                                                        |
| Structure:  | <chem>COC(=O)c1ccccc1C1c2ccc(N)cc2Oc2cc(N)ccc12</chem>          |
| Name:       | Phosphate diethylstilbesterol                                   |
| Method:     | Pharmacological Effect                                          |
| References: | 4                                                               |
| Structure:  | <chem>CCVC(c1ccc(O)cc1)=C(/CC)c1ccc(OP([O-])([O-])=O)cc1</chem> |
| Name:       | Sulofenur                                                       |
| Method:     | Pharmacological Effect                                          |
| References: | 4                                                               |



|             |                                                                           |
|-------------|---------------------------------------------------------------------------|
| Structure:  | [O-]<br>]S(=O)(=NC(=O)Nc1ccc(Cl)cc1)c1ccc2CCCc<br>2c1                     |
| Name:       | Buquinolate                                                               |
| Method:     | Pharmacological Effect                                                    |
| References: | 4                                                                         |
| Structure:  | CCOC(=O)C1=C[N-]<br>]c2cc(OCC(C)C)c(OCC(C)C)cc2C1=O                       |
| Name:       | Malachite green                                                           |
| Method:     | Uptake/Binding                                                            |
| References: | 4, 41                                                                     |
| Structure:  | CN(C)c1ccc(cc1)C(c1cccc1)=C1C=CC(C=C<br>1)=[N+](C)C                       |
| Name:       | Pyridaben                                                                 |
| Method:     | Pharmacological Effect                                                    |
| References: | 4                                                                         |
| Structure:  | CC(C)(C)N1N=CC(SCc2ccc(cc2)C(C)(C)C)=<br>C(Cl)C1=O                        |
| Name:       | Methylbenzoate                                                            |
| Method:     | Pharmacological Effect                                                    |
| References: | 4                                                                         |
| Structure:  | CCCCc1cc2C(=O)C(=C[N-]<br>]c2cc1OCc1cccc1)C(=O)OC                         |
| Name:       | D288; 4-(4-(dimethylamino)styryl)-N-<br>methylpyridinium iodide4-Di-1-ASP |
| Method:     | Fluorescence Microscopy                                                   |
| References: | 244                                                                       |
| Structure:  | CN(C)c1ccc(cc1)\C=C\c1cc[n+](C)cc1                                        |
| Name:       | Menoctone                                                                 |
| Method:     | Pharmacological Effect                                                    |
| References: | 4                                                                         |
| Structure:  | [O-]<br>]C1=C(CCCCCCCC2CCCC2)C(=O)C(=O)<br>)c2cccc12                      |
| Name:       | Cinnarizine                                                               |
| Method:     | Pharmacological Effect                                                    |
| References: | 4                                                                         |
| Structure:  | C1C[NH+](CCN1\C=C\c1cccc1)C(c1cccc<br>1)c1cccc1                           |
| Name:       | Crystal violet                                                            |
| Method:     | Uptake/Binding                                                            |
| References: | 4, 41                                                                     |
| Structure:  | CN(C)c1ccc(cc1)C(c1ccc(cc1)N(C)C)=C1C=<br>CC(C=C1)=[N+](C)C               |
| Name:       | Haloperidol                                                               |
| Method:     | Pharmacological Effect                                                    |
| References: | 4, 6                                                                      |
| Structure:  | OC1(CC[NH+](CCCC(=O)c2ccc(F)cc2)CC1)<br>c1ccc(Cl)cc1                      |
| Name:       | T639; Tetramethylrosamine chlorid                                         |

|             |                                                                      |
|-------------|----------------------------------------------------------------------|
| Method:     | Fluorescence Microscopy                                              |
| References: | 577                                                                  |
| Structure:  | CN(C)c1ccc2c(OC3=CC(C=CC3=C2c2cccc2<br>)=[N+](C)C)c1                 |
| Name:       | M7511; MitoTracker® Orange CM-H2TMRos                                |
| Method:     | Fluorescence Microscopy                                              |
| References: | 306, 578                                                             |
| Structure:  | CN(C)c1ccc2C(c3ccc(CCl)cc3)c3ccc(cc3Oc2<br>1)N(C)C                   |
| Name:       | Tioxaprofen                                                          |
| Method:     | Pharmacological Effect                                               |
| References: | 4                                                                    |
| Structure:  | CC(Sc1nc(-c2ccc(Cl)cc2)c(o1)-<br>c1ccc(Cl)cc1)C([O-])=O              |
| Name:       | Rotenone                                                             |
| Method:     | Pharmacological Effect                                               |
| References: | 4                                                                    |
| Structure:  | COc1cc2OCC3Oc4c5CC(Oc5ccc4C(=O)C3c2<br>cc1OC)C(C)=C                  |
| Name:       | Hexachlorophene                                                      |
| Method:     | Pharmacological Effect                                               |
| References: | 4                                                                    |
| Structure:  | [O-]c1c(Cl)cc(Cl)c(Cl)c1Cc1c([O-]<br>)c(Cl)cc(Cl)c1Cl                |
| Name:       | Perfluorooctanoic acid                                               |
| Method:     | Pharmacological Effect                                               |
| References: | 4                                                                    |
| Structure:  | [O-]<br>]C(=O)C(F)(F)C(F)(F)C(F)(F)C(F)(F)C(F)(F)<br>C(F)(F)C(F)(F)F |
| Name:       | Decoquinat                                                           |
| Method:     | Pharmacological Effect                                               |
| References: | 4                                                                    |
| Structure:  | CCCCCCCCCOc1cc2C(=O)C(=C[N-]<br>]c2cc1OCC)C(=O)OCC                   |
| Name:       | M7510; MitoTracker® Orange CMTMRos;<br>Tetramethylrosamine           |
| Method:     | Fluorescence Microscopy                                              |
| References: | 579                                                                  |
| Structure:  | CN(C)c1ccc2c(OC3=CC(C=CC3=C2c2ccc(C<br>Cl)cc2)=[N+](C)C)c1           |
| Name:       | Ranolazine                                                           |
| Method:     | Pharmacological Effect                                               |
| References: | 4                                                                    |
| Structure:  | COc1cccc1OC[C@H](O)CN1CCN(CC1)CC(<br>=O)Nc1c(C)cccc1C                |
| Name:       | MKT-077                                                              |
| Method:     | Fluorescence Microscopy                                              |
| References: | 4, 190                                                               |
| Structure:  | CCN1C(=O)\C(\S\C1=C\c1cccc[n+])1CC)=C1\<br>Sc2cccc2N1C               |

|             |                                                                                  |
|-------------|----------------------------------------------------------------------------------|
| Name:       | R14060; RedoxSensor™ Red CC-1                                                    |
| Method:     | Fluorescence Microscopy                                                          |
| References: | 306                                                                              |
| Structure:  | <chem>CN(C)c1ccc2C(c3ccc(cc3O)c2c1)N(C)C)c1c(F)c(F)c(F)c1F</chem>                |
| Name:       | Fluphenazine                                                                     |
| Method:     | Pharmacological Effect                                                           |
| References: | 4, 58                                                                            |
| Structure:  | <chem>OCCN1CC[NH+](CCCN2c3cccc3Sc3ccc(cc23)C(F)(F)F)CC1</chem>                   |
| Name:       | Rhodamine 6G                                                                     |
| Method:     | Fluorescence Microscopy                                                          |
| References: | 4, 76                                                                            |
| Structure:  | <chem>CCNc1cc2OC3=C\C(=N\CC)\C(C)=CC3=C(c2cc1C)c1cccc1C(=O)OCC</chem>            |
| Name:       | D633; Dihydrorhodamine 6G                                                        |
| Method:     | Fluorescence Microscopy                                                          |
| References: | 601, 710                                                                         |
| Structure:  | <chem>CCNc1cc2Oc3cc(NCC)c(C)cc3C(c2cc1C)c1cccc1C(=O)OCC</chem>                   |
| Name:       | Cyhalothrine; Cyhalothrin                                                        |
| Method:     | Pharmacological Effect                                                           |
| References: | 4                                                                                |
| Structure:  | <chem>CC1(C)C(\C=C(/Cl)C(F)(F)F)C1C(=O)OC(C#N)c1cccc(Oc2cccc2)c1</chem>          |
| Name:       | P243; 1-pyrenehexadecanoic acid                                                  |
| Method:     | Fluorescence Microscopy                                                          |
| References: | 672                                                                              |
| Structure:  | <chem>[O-]C(=O)CCCCCCCCCCCCC1ccc2ccc3ccc4ccc1c2c34</chem>                        |
| Name:       | Dequalinium                                                                      |
| Method:     | Fluorescence Microscopy                                                          |
| References: | 4, 27                                                                            |
| Structure:  | <chem>Cc1cc(N)c2cccc2[n+]1CCCCCCCCC[n+]1c(C)cc(N)c2cccc12</chem>                 |
| Name:       | Betulinic acid                                                                   |
| Method:     | Pharmacological Effect                                                           |
| References: | 4                                                                                |
| Structure:  | <chem>CC(=C)C1CCC2(CCC3(C)C(CCC4C5(C)CC(C(O)C(C)(C)C5CCC34C)C12)C([O-])=O</chem> |
| Name:       | Victoria blue                                                                    |
| Method:     | Pharmacological Effect                                                           |
| References: | 4                                                                                |
| Structure:  | <chem>CN(C)c1ccc(cc1)C(c1ccc(cc1)N(C)C)=C1C=C/C(=N/e2cccc2)c2cccc12</chem>       |
| Name:       | Rhodamine B                                                                      |
| Method:     | Fluorescence Microscopy                                                          |
| References: | 677, 711                                                                         |
| Structure:  | <chem>CCN(CC)c1ccc2c(OC3=CC(C=CC3=C2)c2ccc</chem>                                |

|             |                                                                                        |
|-------------|----------------------------------------------------------------------------------------|
| Structure:  | <chem>cc2C([O-]=O)=[N+](CC)CC)c1</chem>                                                |
| Name:       | Myxothiazol                                                                            |
| Method:     | Pharmacological Effect                                                                 |
| References: | 4                                                                                      |
| Structure:  | <chem>COC(\C=C\c1csc(n1)-c1csc(n1)C(C)\C=C\C(C)C)C(C)C(\OC)=C/C(N)=O</chem>            |
| Name:       | M7513; MitoTracker® Red CM-H2XRos                                                      |
| Method:     | Fluorescence Microscopy                                                                |
| References: | 50                                                                                     |
| Structure:  | <chem>ClCc1ccc(cc1)C1c2cc3CCCN4CCCC(c2Oc2c1cc1CCCN5CCCc2c15)c34</chem>                 |
| Name:       | T668; Tetramethylrhodamine, methyl ester, perchlorate; TMRM                            |
| Method:     | Fluorescence Microscopy                                                                |
| References: | 463                                                                                    |
| Structure:  | <chem>COC(=O)c1cccc1C1=C2C=CC(C=C2Oc2ccc12)N(C)C)=[N+](C)C</chem>                      |
| Name:       | L6868; Bis-N-methylacridinium nitrate; Lucigenin                                       |
| Method:     | Uptake/Binding                                                                         |
| References: | 580                                                                                    |
| Structure:  | <chem>C[n+]1c2cccc2c(-c2c3cccc3[n+](C)c3cccc23)c2cccc12</chem>                         |
| Name:       | Janus green B                                                                          |
| Method:     | Cell Fractionation                                                                     |
| References: | 712                                                                                    |
| Structure:  | <chem>CCN(CC)c1ccc2nc3ccc(cc3[n+](c3cccc3)c2c1)N=Nc1ccc(cc1)N(C)C</chem>               |
| Name:       | Perfluorodecanoic acid                                                                 |
| Method:     | Pharmacological Effect                                                                 |
| References: | 4                                                                                      |
| Structure:  | <chem>[O-]C(=O)C(F)(F)C(F)(F)C(F)(F)C(F)(F)C(F)(F)C(F)(F)C(F)(F)C(F)(F)C(F)(F)F</chem> |
| Name:       | T669; Tetramethylrhodamine, ethyl ester, perchlorate; TMRE                             |
| Method:     | Fluorescence Microscopy                                                                |
| References: | 463                                                                                    |
| Structure:  | <chem>CCOC(=O)c1cccc1C1=C2C=CC(C=C2Oc2c1ccc12)N(C)C)=[N+](C)C</chem>                   |
| Name:       | M7512; MitoTracker® Red CMXRos                                                         |
| Method:     | Fluorescence Microscopy                                                                |
| References: | 50, 582                                                                                |
| Structure:  | <chem>ClCc1ccc(cc1)C1=C2C=C3CCC[N+](C)4=C3C(CCC4)=C2Oc2c3CCCN4CCCC(cc12)c34</chem>     |
| Name:       | M22426; MitoTracker® Deep Red 633                                                      |
| Method:     | Fluorescence Microscopy                                                                |
| References: | 607                                                                                    |
| Structure:  | <chem>C[N+]1=C(/C=C\C=C\C=C2/N(Cc3ccc(CCl)c3)c3cccc3C2(C)C)C(C)(C)c2cccc12</chem>      |

|             |                                                                                                                                |
|-------------|--------------------------------------------------------------------------------------------------------------------------------|
| Name:       | Protoporphyrin IX                                                                                                              |
| Method:     | Uptake/Binding                                                                                                                 |
| References: | 4, 118                                                                                                                         |
| Structure:  | <chem>Cc1c(CCC([O-])=O)c2cc3nc(cc4[nH]c(cc5[nH]c(cc1n2)c(C)c5C=C)c(C)c4C=C)c(C)c3CCC([O-])=O</chem>                            |
| Name:       | Xanthomegnin                                                                                                                   |
| Method:     | Pharmacological Effect                                                                                                         |
| References: | 4                                                                                                                              |
| Structure:  | <chem>COC1=C(C(=O)c2c(O)c3C(=O)OC(C)Cc3cc2C1=O)C1=C(OC)C(=O)c2cc3CC(C)OC(=O)c3c(O)c2C1=O</chem>                                |
| Name:       | Bromophenophos                                                                                                                 |
| Method:     | Pharmacological Effect                                                                                                         |
| References: | 4                                                                                                                              |
| Structure:  | <chem>Oc1cc(Br)cc(Br)c1-c1c(Br)cc(Br)cc1OP([O-])([O-])=O</chem>                                                                |
| Name:       | D378; 3,3'-diheptyloxacarboyanine iodide; DiOC7(3)                                                                             |
| Method:     | Fluorescence Microscopy                                                                                                        |
| References: | 582                                                                                                                            |
| Structure:  | <chem>CCCCCCCN1\C(Oc2ccccc12)=C\C=C\c1oc2cccc2[n+]1CCCCCCC</chem>                                                              |
| Name:       | T3168; 5,5',6,6'-tetrachloro-1,1',3,3'-tetraethylbenzimidazolylcarboyanine iodide; JC-1; CBIC2(3)                              |
| Method:     | Fluorescence Microscopy                                                                                                        |
| References: | 52                                                                                                                             |
| Structure:  | <chem>CCN1C(=C\C=C\c2n(CC)c3cc(Cl)c(Cl)cc3[n+])2CC)N(CC)c2cc(Cl)c(Cl)cc12</chem>                                               |
| Name:       | M7514; MitoTracker® Green FM                                                                                                   |
| Method:     | Fluorescence Microscopy                                                                                                        |
| References: | 154                                                                                                                            |
| Structure:  | <chem>CN1\C(Oc2ccccc12)=C/C=C/c1n(Cc2ccc(CCl)cc2)c2cc(Cl)c(Cl)cc2[n+]1Cc1ccc(CCl)cc1</chem>                                    |
| Name:       | Verteporfin                                                                                                                    |
| Method:     | Pharmacological Effect                                                                                                         |
| References: | 4                                                                                                                              |
| Structure:  | <chem>COC(=O)CCc1c(C)c2cc3nc(cc4[nH]c(cc5nc(c1[nH]2)c(CCC([O-])=O)c5C)c(C=C)c4C)C1=CC=C([C@@H](C(=O)OC)[C@@]31C)C(=O)OC</chem> |
| Name:       | Ditercalinium                                                                                                                  |
| Method:     | Pharmacological Effect                                                                                                         |
| References: | 4                                                                                                                              |
| Structure:  | <chem>COc1ccc2[nH]c3ccc4cc[n+](CCN5CCC(CC5)C5CCN(CC5)CC[n+])5ccc6ccc7[nH]c8ccc(OC)cc8c7c6c5)cc4c3c2c1</chem>                   |
| Name:       | M22425; MitoTracker® Red 580                                                                                                   |
| Method:     | Fluorescence Microscopy                                                                                                        |
| References: | 576                                                                                                                            |

|             |                                                                                                                                  |
|-------------|----------------------------------------------------------------------------------------------------------------------------------|
| Structure:  | <chem>CN1c2ccccc2C(C)(C)\C1=C/C=C/C=C/c1n(Cc2ccc(CCl)cc2)c2cc(Cl)c(Cl)cc2[n+]1Cc1ccc(CCl)cc1</chem>                              |
| Name:       | Rhodopinal glucoside; RPA                                                                                                        |
| Method:     | Pharmacological Effect                                                                                                           |
| References: | 4                                                                                                                                |
| Structure:  | <chem>C\C(C)=C\C=C\C(C)=C\C=C\C(C)=C\C=C\C(CO)=C\C=C\C=C(C)\C=C\C(C)\C=C\C=C/C(/C)CCCC(C)(C)OC1OC(CO)C(O)C(O)C1O</chem>          |
| Name:       | Rhod-2                                                                                                                           |
| Method:     | Pharmacological Effect                                                                                                           |
| References: | 4                                                                                                                                |
| Structure:  | <chem>CN(C)c1ccc2c(Oc3cc(ccc3C2=C2C=CC(C)O)CCOc3cc(C)ccc3N(CC([O-])=O)CC([O-])=O)=C2)=[N+](CC([O-])=O)CC([O-])=O)N(C)C)c1</chem> |
| Name:       | Rhodamine 123                                                                                                                    |
| Method:     | Fluorescence Microscopy                                                                                                          |
| References: | 4                                                                                                                                |
| Structure:  | <chem>COC(=O)c1ccccc1C1=C2C=CC(=[NH2+])C=C2Oc2cc(N)ccc12</chem>                                                                  |
| Name:       | Methylene Blue                                                                                                                   |
| Method:     | Pharmacological Effect                                                                                                           |
| References: | 12                                                                                                                               |
| Structure:  | <chem>CN(C)c1ccc2nc3ccc(cc3[s+])c2c1)N(C)C</chem>                                                                                |
| Name:       | Nefazodone                                                                                                                       |
| Method:     | Pharmacological Effect                                                                                                           |
| References: | 14                                                                                                                               |
| Structure:  | <chem>CCC1=NN(CCCN2CCN(CC2)c2cccc(Cl)c2)C(=O)N1CCOc1ccccc1</chem>                                                                |
| Name:       | IBTP; 4-iodobutyl-tri(phenyl)phosphonium iodide                                                                                  |
| Method:     | Cell Fractionation                                                                                                               |
| References: | 25                                                                                                                               |
| Structure:  | <chem>ICCCC[P+](c1ccccc1)(c1ccccc1)c1ccccc1</chem>                                                                               |
| Name:       | IDTP                                                                                                                             |
| Method:     | Cell Fractionation                                                                                                               |
| References: | 26                                                                                                                               |
| Structure:  | <chem>ICCCCCCCCC[P+](c1ccccc1)(c1ccccc1)c1ccccc1</chem>                                                                          |
| Name:       | DecylTPP                                                                                                                         |
| Method:     | Cell Fractionation                                                                                                               |
| References: | 26                                                                                                                               |
| Structure:  | <chem>CCCCCCCCC[P+](c1ccccc1)(c1ccccc1)c1ccccc1</chem>                                                                           |
| Name:       | MitoQ; [10-(4,5-dimethoxy-2-methyl-3,6-dioxo-1,4-cyclohexadien-1-yl)decyl]triphenylphosphonium bromide; Mitoquinone              |
| Method:     | Cell Fractionation                                                                                                               |

|             |                                                                                                                                                                                                                        |
|-------------|------------------------------------------------------------------------------------------------------------------------------------------------------------------------------------------------------------------------|
| References: | 25, 26                                                                                                                                                                                                                 |
| Structure:  | <chem>COC1=C(OC)C(=O)C(CCCCCCCCC[P+](c2ccccc2)(c2ccccc2)c2ccccc2)=C(C)C1=O</chem>                                                                                                                                      |
| Name:       | MitoVit E; [2-(3,4-dihydro-6-hydroxy-2,5,7,8-tetramethyl-2H-1-benzopyran-2-yl)ethyl]triphenylphosphonium bromide                                                                                                       |
| Method:     | Cell Fractionation                                                                                                                                                                                                     |
| References: | 25, 26                                                                                                                                                                                                                 |
| Structure:  | <chem>Cc1c(C)c2OC(C)(CCc2c(C)c1O)CC[P+](c1ccc1)(c1ccccc1)c1ccccc1</chem>                                                                                                                                               |
| Name:       | Chlortetracycline                                                                                                                                                                                                      |
| Method:     | Fluorescence Microscopy                                                                                                                                                                                                |
| References: | 127                                                                                                                                                                                                                    |
| Structure:  | <chem>C[NH+](C)C1C2CC3C(C(=O)C2(O)C(=O)\C(=C(N)[O-])C1=O)=C([O-])c1c(O)ccc(Cl)c1C3(C)O</chem>                                                                                                                          |
| Name:       | LCL120                                                                                                                                                                                                                 |
| Method:     | Pharmacological Effect                                                                                                                                                                                                 |
| References: | 13                                                                                                                                                                                                                     |
| Structure:  | <chem>CC(NC(=O)CCCCCCCCCCCCC[n+])1ccc1C(O)c1ccccc1</chem>                                                                                                                                                              |
| Name:       | LCL85                                                                                                                                                                                                                  |
| Method:     | Pharmacological Effect                                                                                                                                                                                                 |
| References: | 13                                                                                                                                                                                                                     |
| Structure:  | <chem>OCC(NC(=O)CCCCCCCCCCCCC[n+])1ccc1C(O)c1ccc(cc1)N(=O)=O</chem>                                                                                                                                                    |
| Name:       | 1a                                                                                                                                                                                                                     |
| Method:     | Fluorescence Microscopy                                                                                                                                                                                                |
| References: | 19                                                                                                                                                                                                                     |
| Structure:  | <chem>CN1\C(Sc2ccccc12)=C\c1cc[n+](CCCCC(=O)NC(CC2CCCC2)C(=O)NC(CCC\NH+)=C(\N)N)C(=O)NC(CC2CCCC2)C(=O)NC(CCC[NH3+])C(=O)NC(CC2CCCC2)C(=O)NC(CCC\NH+)=C(\N)N)C(=O)NC(CC2CCCC2)C(=O)NC(CCC[NH3+])C(N)=O)c2ccccc12</chem> |
| Name:       | 1b                                                                                                                                                                                                                     |
| Method:     | Fluorescence Microscopy                                                                                                                                                                                                |
| References: | 19                                                                                                                                                                                                                     |
| Structure:  | <chem>CN1\C(Sc2ccccc12)=C\c1cc[n+](CCCCC(=O)NC(Cc2ccccc2)C(=O)NC(CCC\NH+)=C(\N)N)C(=O)NC(Cc2ccccc2)C(=O)NC(CCCC[NH3+])C(=O)NC(Cc2ccccc2)C(=O)NC(CCC\NH+)=C(\N)N)C(=O)NC(CCC[NH3+])C(N)=O)c2ccccc12</chem>              |
| Name:       | 2a                                                                                                                                                                                                                     |
| Method:     | Fluorescence Microscopy                                                                                                                                                                                                |
| References: | 19                                                                                                                                                                                                                     |
| Structure:  | <chem>CN1\C(Sc2ccccc12)=C\c1cc[n+](CCCCC(=O)NC(CC2CCCC2)C(=O)NC(CCC\NH+)=C(\N)N)C(=O)NC(CC2CCCC2)C(=O)NC(CCC[NH3+])C(N)=O)c2ccccc12</chem>                                                                             |

|             |                                                                                                                                                        |
|-------------|--------------------------------------------------------------------------------------------------------------------------------------------------------|
| Name:       | 2b                                                                                                                                                     |
| Method:     | Fluorescence Microscopy                                                                                                                                |
| References: | 19, 251                                                                                                                                                |
| Structure:  | <chem>CN1\C(Sc2ccccc12)=C\c1cc[n+](CCCCC(=O)NC(Cc2ccccc2)C(=O)NC(CCC\NH+)=C(\N)N)C(=O)NC(Cc2ccccc2)C(=O)NC(CCCC[NH3+])C(N)=O)c2ccccc12</chem>          |
| Name:       | 2c                                                                                                                                                     |
| Method:     | Fluorescence Microscopy                                                                                                                                |
| References: | 19                                                                                                                                                     |
| Structure:  | <chem>CN1\C(Sc2ccccc12)=C\c1cc[n+](CCCCC(=O)NC(Cc2ccccc2)C(=O)NC(CCC\NH+)=C(\N)N)C(=O)NC(CC2CCCC2)C(=O)NC(CCC[NH3+])C(N)=O)c2ccccc12</chem>            |
| Name:       | 2d                                                                                                                                                     |
| Method:     | Fluorescence Microscopy                                                                                                                                |
| References: | 19                                                                                                                                                     |
| Structure:  | <chem>CN1\C(Sc2ccccc12)=C\c1cc[n+](CCCCC(=O)NC(Cc2ccccc2)C(=O)NC(CCC\NH+)=C(\N)N)C(=O)NC(Cc2ccccc2)c2ccccc2)C(=O)NC(CCCC[NH3+])C(N)=O)c2ccccc12</chem> |
| Name:       | 2e                                                                                                                                                     |
| Method:     | Fluorescence Microscopy                                                                                                                                |
| References: | 19                                                                                                                                                     |
| Structure:  | <chem>CN1\C(Sc2ccccc12)=C\c1cc[n+](CCCCC(=O)NC(Cc2ccccc2)C(=O)NC(CCC\NH+)=C(\N)N)C(=O)NC(Cc2ccccc3ccccc23)C(=O)NC(CCC[NH3+])C(N)=O)c2ccccc12</chem>    |
| Name:       | 2f                                                                                                                                                     |
| Method:     | Fluorescence Microscopy                                                                                                                                |
| References: | 19                                                                                                                                                     |
| Structure:  | <chem>CCCCC(NC(=O)C(CCC\NH+)=C(\N)N)NC(=O)C(Cc1ccccc1)NC(=O)CCCC[n+])1ccc(\C=C2/Sc3ccccc3N2C)c2ccccc12)C(=O)NC(CCC[NH3+])C(N)=O</chem>                 |
| Name:       | 2g                                                                                                                                                     |
| Method:     | Fluorescence Microscopy                                                                                                                                |
| References: | 19                                                                                                                                                     |
| Structure:  | <chem>COc1ccc(CC(NC(=O)C(CCC\NH+)=C(\N)N)NC(=O)C(Cc2ccccc2)NC(=O)CCCC[n+])2ccc(\C=C3/Sc4ccccc4N3C)c3ccccc23)C(=O)NC(CCC[NH3+])C([O-])=O)cc1</chem>     |
| Name:       | MitoQH2                                                                                                                                                |
| Method:     | Cell Fractionation                                                                                                                                     |
| References: | 26                                                                                                                                                     |
| Structure:  | <chem>COc1c(O)c(C)c(CCCCCCCCC[P+](c2ccccc2)(c2ccccc2)c2ccccc2)c(O)c1OC</chem>                                                                          |
| Name:       | F16                                                                                                                                                    |
| Method:     | Fluorescence Microscopy                                                                                                                                |
| References: | 29                                                                                                                                                     |
| Structure:  | <chem>C[n+])1ccc(cc1)\C=C\c1c[nH]c2ccccc12</chem>                                                                                                      |
| Name:       | Ethyl Violet; EV+                                                                                                                                      |

|             |                                                                                                 |
|-------------|-------------------------------------------------------------------------------------------------|
| Method:     | Uptake/Binding                                                                                  |
| References: | 41                                                                                              |
| Structure:  | <chem>CCN(CC)c1ccc(cc1)C(c1ccc(cc1)N(CC)CC)=C1C=CC(C=C1)=[N+](CC)CC</chem>                      |
| Name:       | Victoria Blue R; VBR+                                                                           |
| Method:     | Uptake/Binding                                                                                  |
| References: | 41                                                                                              |
| Structure:  | <chem>CCN(CC)c1ccc(C(c2ccc(cc2)N(C)C)=C2C=C(C=C2)=[N+](C)C)c2ccccc12</chem>                     |
| Name:       | Victoria Blue B; VBB+                                                                           |
| Method:     | Uptake/Binding                                                                                  |
| References: | 41                                                                                              |
| Structure:  | <chem>CN(C)c1ccc(cc1)C(=C1C=CC(C=C1)=[N+](C)C)c1ccc(Nc2ccccc2)c2ccccc12</chem>                  |
| Name:       | Victoria Pure Blue BO; VPBBO+                                                                   |
| Method:     | Uptake/Binding                                                                                  |
| References: | 41                                                                                              |
| Structure:  | <chem>CCNc1ccc(C(c2ccc(cc2)N(CC)CC)=C2C=CC(C=C2)=[N+](CC)CC)c2ccccc12</chem>                    |
| Name:       | MitoPeroxidase; 2-[4-(4-triphenylphosphoniobutoxy)phenyl]-1,2-benzisoselenazol-3(2H)-one iodide |
| Method:     | Uptake/Binding                                                                                  |
| References: | 38                                                                                              |
| Structure:  | <chem>O=C1N([Se]c2ccccc12)c1ccc(OCCCC[P+](c2ccccc2)(c2ccccc2)c2ccccc2)cc1</chem>                |
| Name:       | Ebselen                                                                                         |
| Method:     | Uptake/Binding                                                                                  |
| References: | 38                                                                                              |
| Structure:  | <chem>O=C1N([Se]c2ccccc12)c1ccccc1</chem>                                                       |
| Name:       | HMP 1c; 3,3'-[ω, ω'-alkanediylbis(oxy)]2-(hydroxylimino)methyl-1-methylpyridinium               |
| Method:     | Uptake/Binding                                                                                  |
| References: | 47                                                                                              |
| Structure:  | <chem>C[n+]1cccc(OCCCCO2ccc[n+](C)c2\C=N\O-)c1\C=N\O-</chem>                                    |
| Name:       | HMP 1d; 3,3'-[ω, ω'-alkanediylbis(oxy)]2-(hydroxylimino)methyl-1-methylpyridinium               |
| Method:     | Uptake/Binding                                                                                  |
| References: | 47                                                                                              |
| Structure:  | <chem>C[n+]1cccc(OCCCCO2ccc[n+](C)c2\C=N\O-)c1\C=N\O-</chem>                                    |
| Name:       | HMP 1e; 3,3'-[ω, ω'-alkanediylbis(oxy)]2-(hydroxylimino)methyl-1-methylpyridinium               |
| Method:     | Uptake/Binding                                                                                  |
| References: | 47                                                                                              |
| Structure:  | <chem>C[n+]1cccc(OCCCCO2ccc[n+](C)c2\C=N\O-)c1\C=N\O-</chem>                                    |
| Name:       | MPP+; 1-methyl-4-phenylpyridinium                                                               |
| Method:     | Uptake/Binding                                                                                  |
| References: | 49                                                                                              |

|             |                                                                                             |
|-------------|---------------------------------------------------------------------------------------------|
| Structure:  | <chem>c1ccc(cc1)-c1ccncc1</chem>                                                            |
| Name:       | Rhodamine 110; Rh 110                                                                       |
| Method:     | Fluorescence Microscopy                                                                     |
| References: | 64                                                                                          |
| Structure:  | <chem>Nc1ccc2c(OC3=CC(=[NH2+])C=CC3=C2c2c1)ccc2C([O-])=O)c1</chem>                          |
| Name:       | HAO; 3,6-Bis(dimethylamino)-10-hexylacridinium; acridine orange 10-hexyl bromide            |
| Method:     | Fluorescence Microscopy                                                                     |
| References: | 72                                                                                          |
| Structure:  | <chem>CCCCCC[n+]1c2cc(ccc2cc2ccc(cc12)N(C)C)N(C)C</chem>                                    |
| Name:       | MAO; 3,6-Bis(dimethylamino)-10-methylacridinium Iodide; acridine orange 10-methyl iodide    |
| Method:     | Fluorescence Microscopy                                                                     |
| References: | 72                                                                                          |
| Structure:  | <chem>CN(C)c1ccc2cc3ccc(cc3[n+](C)c2c1)N(C)C</chem>                                         |
| Name:       | NAO; 3,6-Bis(dimethylamino)-10-nonylacridinium bromide; acridine orange 10-nonyl bromide    |
| Method:     | Fluorescence Microscopy                                                                     |
| References: | 72                                                                                          |
| Structure:  | <chem>CCCCCCCC[n+]1c2cc(ccc2cc2ccc(cc12)N(C)C)N(C)C</chem>                                  |
| Name:       | Oxytetracycline; Terramycin                                                                 |
| Method:     | histo                                                                                       |
| References: | 74                                                                                          |
| Structure:  | <chem>C[NH+](C)C1C2C(O)C3C(C(=O)C2(O)C(=O))C(=C(N)[O-])C1=O=C([O-])c1c(O)cccc1C3(C)O</chem> |
| Name:       | Rhodamine 3B; R3B                                                                           |
| Method:     | Fluorescence Microscopy                                                                     |
| References: | 76                                                                                          |
| Structure:  | <chem>CCOC(=O)c1ccccc1C1=C2C=CC(C=C2O2c1c(ccc12)N(CC)CC)=[N+](CC)CC</chem>                  |
| Name:       | DiOC2(3)                                                                                    |
| Method:     | Fluorescence Microscopy                                                                     |
| References: | 76                                                                                          |
| Structure:  | <chem>CCN1\C(Oc2ccccc12)=C\C=C\c1oc2ccccc2[n+]1CC</chem>                                    |
| Name:       | APMC (azopentylmethylindocarbocyanine)                                                      |
| Method:     | Fluorescence Microscopy                                                                     |
| References: | 77                                                                                          |
| Structure:  | <chem>CN1c2ccccc2C(C)(C)\C1=C/C=C/C1=[N+](CCCC2(C)N=N2)c2ccccc2C1(C)C</chem>                |
| Name:       | PhoCy                                                                                       |
| Method:     | Fluorescence Microscopy                                                                     |
| References: | 78                                                                                          |
| Structure:  | <chem>CN1c2ccc(CNc3ccc(cc3N(=O)=O)N=[N+]=[</chem>                                           |

|             |                                                                                                                   |
|-------------|-------------------------------------------------------------------------------------------------------------------|
|             | <chem>N-]cc2C(C)(C)\C1=C\C=C\C1=[N+](C)c2ccc(CNc3ccc(cc3N(=O)=O)N=[N+]=[N-])cc2C1(C)C</chem>                      |
| Name:       | mTHPC (meso-tetrahydroxyphenylchlorin); Foscan; Temoporfin                                                        |
| Method:     | Fluorescence Microscopy                                                                                           |
| References: | 83                                                                                                                |
| Structure:  | <chem>Oc1cccc(c1)-c1c2CCc(n2)c(-c2cccc(O)c2)c2ccc([nH]2)c(-c2cccc(O)c2)c2ccc(n2)c(-c2cccc(O)c2)c2ccc1[nH]2</chem> |
| Name:       | Photofrin                                                                                                         |
| Method:     | Fluorescence Microscopy                                                                                           |
| References: | 95                                                                                                                |
| Structure:  | <chem>CCc1c(C)c2cc3nc(cc4nc(cc5[nH]c(cc1[nH]2)(C)c5C(C)O)c(C)c4CCC([O-])=O)c(CCC([O-])=O)c3C</chem>               |
| Name:       | Aminolevulinic Acid                                                                                               |
| Method:     | Fluorescence Microscopy                                                                                           |
| References: | 95                                                                                                                |
| Structure:  | <chem>[NH3+]CC(=O)CCC([O-])=O</chem>                                                                              |
| Name:       | CPO                                                                                                               |
| Method:     | Fluorescence Microscopy                                                                                           |
| References: | 99                                                                                                                |
| Structure:  | <chem>CC(CCO)CC(O)N(O)CCCC(NC(C)=O)C(=O)OCC\C=C\C(O)N(O)\C=C\CC1NC(=O)C(NC1=O)\C=C\CN(O)C(O)CC(C)CCO</chem>       |
| Name:       | Mesochlorin; Mce6                                                                                                 |
| Method:     | Fluorescence Microscopy                                                                                           |
| References: | 100                                                                                                               |
| Structure:  | <chem>CCc1c(C)c2cc3[nH]c(cc4nc(c(CCC([O-])=O)c4C)c(CC(=O)NCC[NH3+])c4[nH]c(cc1n2)c(C)c4C([O-])=O)c(C)c3CC</chem>  |
| Name:       | EDKC; N,N'-bis(2-ethyl-1,3-dioxolane)kryptocyanine                                                                |
| Method:     | Fluorescence Microscopy                                                                                           |
| References: | 109                                                                                                               |
| Structure:  | <chem>C1COC(CCN2C=C/C(=C/C=C/c3cc[n+](CCC4OCCO4)c4cccc34)c3cccc23)O1</chem>                                       |
| Name:       | MBMG; Methylglyoxal-bis(guanylylhydrazone)]                                                                       |
| Method:     | Pharmacological Effect                                                                                            |
| References: | 126                                                                                                               |
| Structure:  | <chem>CC(\C=N\N=C(N)N)=N/N=C(N)N</chem>                                                                           |
| Name:       | Topotecan                                                                                                         |
| Method:     | Fluorescence Microscopy                                                                                           |
| References: | 130                                                                                                               |
| Structure:  | <chem>CCC1(O)C(=O)OCC2=C1C=C1N(Cc3cc4c(C[NH+](C)C)c(O)ccc4nc13)C2=O</chem>                                        |
| Name:       | Demethylchlortetracycline; Demeclocycline                                                                         |

|             |                                                                                                                                                                                    |
|-------------|------------------------------------------------------------------------------------------------------------------------------------------------------------------------------------|
| Method:     | Fluorescence Microscopy                                                                                                                                                            |
| References: | 127                                                                                                                                                                                |
| Structure:  | <chem>C[NH+](C)C1C2CC3C(O)c4c(Cl)ccc(O)c4C([O-])=C3C(=O)C2(O)C(=O)\C(=C(/N)[O-])C1=O</chem>                                                                                        |
| Name:       | Porphyrin Derivative 4                                                                                                                                                             |
| Method:     | Fluorescence Microscopy                                                                                                                                                            |
| References: | 132                                                                                                                                                                                |
| Structure:  | <chem>CCc1c(C)c2nc1cc1[nH]c(cc3nc(cc4[nH]c(c(C)c4CC)c2-c2cc(OCc4cc(cc(c4)C(F)(F)F)C(F)(F)F)cc(OCc4cc(cc(c4)C(F)(F)F)C(F)(F)F)c2)c(C)c3CCC(=O)OC)c(CCC(=O)OC)c1C</chem>             |
| Name:       | Chlorin 30                                                                                                                                                                         |
| Method:     | Fluorescence Microscopy                                                                                                                                                            |
| References: | 132                                                                                                                                                                                |
| Structure:  | <chem>CCc1c(C)c2[nH]c1cc1nc(cc3[nH]c(cc4nc(c2-c2cc(OCc5cc(cc(c5)C(F)(F)F)C(F)(F)F)cc(OCc5cc(cc(c5)C(F)(F)F)C(F)(F)F)c2)C(C)(O)C4(O)CC)c(C)c3CCC(=O)OC)c(CCC(=O)OC)c1C</chem>       |
| Name:       | Bacteriochlorin 31                                                                                                                                                                 |
| Method:     | Fluorescence Microscopy                                                                                                                                                            |
| References: | 132                                                                                                                                                                                |
| Structure:  | <chem>CCc1c(C)c2[nH]c1cc1nc(cc3[nH]c(cc4nc(c2-c2cc(OCc5cc(cc(c5)C(F)(F)F)C(F)(F)F)cc(OCc5cc(cc(c5)C(F)(F)F)C(F)(F)F)c2)C(C)(O)C4(O)CC)c(C)c3CCC(=O)OC)c(O)(CCC(=O)OC)C1(C)O</chem> |
| Name:       | 6-Aminoquinoline Derivative 2                                                                                                                                                      |
| Method:     | Fluorescence Microscopy                                                                                                                                                            |
| References: | 137                                                                                                                                                                                |
| Structure:  | <chem>Cc1c(N2CCc3ccccc3C2)c(N)cc2C(=O)C(=CN(C3CC3)c12)C([O-])=O</chem>                                                                                                             |
| Name:       | 6-Aminoquinoline Derivative 3                                                                                                                                                      |
| Method:     | Fluorescence Microscopy                                                                                                                                                            |
| References: | 137                                                                                                                                                                                |
| Structure:  | <chem>CN1C=C(C([O-])=O)C(=O)c2cc(N)c(cc12)N1CCN(CC1)c1cccn1</chem>                                                                                                                 |
| Name:       | DADP-a; 5,10-di[4-(N-trimethylaminophenyl)-15,20-diphenylporphyrin                                                                                                                 |
| Method:     | Fluorescence Microscopy                                                                                                                                                            |
| References: | 138                                                                                                                                                                                |
| Structure:  | <chem>C[N+](C)(C)c1ccc(cc1)-c1c2ccc(n2)c(-c2ccc(cc2)[N+](C)(C)C)c2ccc([nH]2)c(-c2ccccc2)c2ccc(n2)c(-c2ccccc2)c2ccc1[nH]2</chem>                                                    |
| Name:       | 99mTc-sestamibi                                                                                                                                                                    |
| Method:     | Cell Fractionation                                                                                                                                                                 |
| References: | 144                                                                                                                                                                                |
| Structure:  | <chem>COC(C)(C)C[N+]#C</chem>                                                                                                                                                      |

|             |                                                                                                                                  |
|-------------|----------------------------------------------------------------------------------------------------------------------------------|
| Name:       | Fura-2                                                                                                                           |
| Method:     | Fluorescence Microscopy                                                                                                          |
| References: | 168                                                                                                                              |
| Structure:  | <chem>Cc1ccc(N(CC([O-])=O)CC([O-])=O)c(OCCOc2cc3cc(oc3cc2N(CC([O-])=O)CC([O-])=O)-c2ncc(o2)C([O-])=O)c1</chem>                   |
| Name:       | Pancratistatin                                                                                                                   |
| Method:     | Pharmacological Effect                                                                                                           |
| References: | 169                                                                                                                              |
| Structure:  | <chem>OC1C(O)C(O)C2C(NC(=O)c3c(O)c4OCOc4c23)C1O</chem>                                                                           |
| Name:       | Anthralin                                                                                                                        |
| Method:     | Fluorescence Microscopy                                                                                                          |
| References: | 178                                                                                                                              |
| Structure:  | <chem>Oc1cccc2Cc3cccc(O)c3C(=O)c12</chem>                                                                                        |
| Name:       | Paclitaxel                                                                                                                       |
| Method:     | Pharmacological Effect                                                                                                           |
| References: | 188                                                                                                                              |
| Structure:  | <chem>CC(=O)OC1C(=O)C2(C)C(O)CC3OCC3(OC(C)=O)C2C(OC(=O)c2ccccc2)C2(O)CC(OC(=O)C(O)C(NC(=O)c3ccccc3)c3ccccc3)C(C)=C1C2(C)C</chem> |
| Name:       | Gossypol                                                                                                                         |
| Method:     | Pharmacological Effect                                                                                                           |
| References: | 189                                                                                                                              |
| Structure:  | <chem>CC(C)c1c(O)c(O)c(C=O)c2c(O)c(c(C)cc12)-c1c(C)cc2c(C(C)C)c(O)c(C=O)c2c1O</chem>                                             |
| Name:       | Mahanine                                                                                                                         |
| Method:     | Pharmacological Effect                                                                                                           |
| References: | 192                                                                                                                              |
| Structure:  | <chem>C\C(C)=C\CCC1(C)Oc2ccc3c4ccc(O)cc4[nH]c3c2C=C1</chem>                                                                      |
| Name:       | Bacteriopurpurinimide Derivative 8                                                                                               |
| Method:     | Fluorescence Microscopy                                                                                                          |
| References: | 212                                                                                                                              |
| Structure:  | <chem>CCCCCN1C(=O)C2=C(C)\C3=C4=N\C(=C/C5[NH2+]\C(\C=C6/N=C(C(CCC(=O)OCC)C6)C(C1=O)=C2N3)C(C)=C5C(C)OCCC)C(C)C4CC</chem>         |
| Name:       | Bacteriopurpurinimide Derivative 9                                                                                               |
| Method:     | Fluorescence Microscopy                                                                                                          |
| References: | 212                                                                                                                              |
| Structure:  | <chem>CCCCCCCOC(C)C1=C(C)C2[NH2+]\C1\C=C1/N=C(/C=C3NC4=C(C(=O)N(CCCCC)C(=O)C4=C3C)C3=N/C(=C\2)C(C)C3CCC(=O)OCC)C(CC)C1C</chem>   |
| Name:       | Bacteriopurpurinimide Derivative 10                                                                                              |
| Method:     | Fluorescence Microscopy                                                                                                          |
| References: | 212                                                                                                                              |
| Structure:  | <chem>CCCCCCCCCOC(C)C1=C(C)C2[NH2+]\C1\C=C1/N=C(/C=C3NC4=C(C(=O)N(CCCCC)C(=O)C4=C3C)C3=N/C(=C\2)C(C)C3CCC(</chem>                |

|             |                                                                                                                                       |
|-------------|---------------------------------------------------------------------------------------------------------------------------------------|
|             | <chem>=O)OCCC)C(CC)C1C</chem>                                                                                                         |
| Name:       | XF 70                                                                                                                                 |
| Method:     | Fluorescence Microscopy                                                                                                               |
| References: | 215                                                                                                                                   |
| Structure:  | <chem>C[N+](C)(C)CCCOc1cccc(c1)-c1c2ccc(cc3ccc([nH]3)c(-c3cccc(OCCC[N+](C)(C)C)c3)ccc(cc4ccc1[nH]4)n3)n2</chem>                       |
| Name:       | XF 73                                                                                                                                 |
| Method:     | Fluorescence Microscopy                                                                                                               |
| References: | 215                                                                                                                                   |
| Structure:  | <chem>C[N+](C)(C)CCCOc1ccc(cc1)-c1c2ccc(cc3ccc([nH]3)c(-c3ccc(OCCC[N+](C)(C)C)cc3)ccc(cc4ccc1[nH]4)n3)n2</chem>                       |
| Name:       | Silicon (IV) Phthalocyanine;<br>SIPc[C3H5(NMe2)2O](OMe)                                                                               |
| Method:     | Fluorescence Microscopy                                                                                                               |
| References: | 217, 427                                                                                                                              |
| Structure:  | <chem>CO[Si]1(OC(CN(C)C)C[NH+](C)C)n2c3cc4nc(cc5n1c(cc1nc(cc2c2ccccc32)c2ccccc12)c1ccc51)c1cccc41</chem>                              |
| Name:       | SS-02; Dmt-D-Arg-Phe-Lys-NH <sub>2</sub> ; (Dmt <sup>1</sup> )-DALDA                                                                  |
| Method:     | Fluorescence Microscopy                                                                                                               |
| References: | 31, 156                                                                                                                               |
| Structure:  | <chem>Cc1cc(O)cc(C)c1CC([NH3+])C(=O)NC(CCCNC(N)=[NH2+])C(=O)NC(Cc1ccccc1)C(=O)NC(CCCC[NH3+])C(N)=O</chem>                             |
| Name:       | SS-19; Dmt-D-Arg-Phe-atnDap-NH <sub>2</sub> ;<br>(Dmt <sup>1</sup> ,atnDap <sup>4</sup> )-DALDA                                       |
| Method:     | Fluorescence Microscopy                                                                                                               |
| References: | 31, 156                                                                                                                               |
| Structure:  | <chem>Cc1cc(O)cc(C)c1CC([NH3+])C(=O)NC(CCCNC(N)=[NH2+])C(=O)NC(Cc1ccccc1)C(=O)NC(C(N)C(=O)c1ccccc1N)C(N)=O</chem>                     |
| Name:       | SS-31; D-Arg-Dmt-Lys-Phe-NH <sub>2</sub>                                                                                              |
| Method:     | Fluorescence Microscopy                                                                                                               |
| References: | 31                                                                                                                                    |
| Structure:  | <chem>Cc1cc(O)cc(C)c1CC(NC(=O)C([NH3+])CCCNC(N)=[NH2+])C(=O)NC(CCCC[NH3+])C(=O)NC(Cc1ccccc1)C(N)=O</chem>                             |
| Name:       | MitoDC-81; [4-((11aS)-7-methoxy-1,2,3,11a-tetrahydro-5H-pyrrolo[2,1-c][1,4]benzodiazepin-5-on-8-oxy)butyl]triphenylphosphonium iodide |
| Method:     | Fluorescence Microscopy                                                                                                               |
| References: | 39                                                                                                                                    |
| Structure:  | <chem>COc1cc2C(=O)N3CCCC3C=Nc2cc1OCCCC[P+](c1ccccc1)(c1ccccc1)c1ccccc1</chem>                                                         |

|             |                                                                                                                                                                                                                   |
|-------------|-------------------------------------------------------------------------------------------------------------------------------------------------------------------------------------------------------------------|
| Name:       | Isometamidium                                                                                                                                                                                                     |
| Method:     | Cell Fractionation                                                                                                                                                                                                |
| References: | 205                                                                                                                                                                                                               |
| Structure:  | <chem>CC[n+](c(-c2ccccc2)c2cc(ccc2c2ccc(N)cc12)\N=N\Nc1ccc(c1)C(N)=[NH2+])</chem>                                                                                                                                 |
| Name:       | 5(6)Carboxyfluorescein-Containing Tetragunidinium Vector                                                                                                                                                          |
| Method:     | Fluorescence Microscopy                                                                                                                                                                                           |
| References: | 33                                                                                                                                                                                                                |
| Structure:  | <chem>CCCC[Si](OCC1CCN2CCC(CSCC3CCN4CC(C(CSCC5CCN6CCC(CSCC7CCN8CCC(CSCCNC(=O)c9ccc%10C(=O)OC%11(c%12ccc(O)cc%12Oc%12cc(O)ccc%11%12)c%10c9)NC8=[NH+])7)NC6=[NH+])5)NC4=[NH+])3)NC2=[NH+])1)(c1cccc1)c1cccc1</chem> |
| Name:       | Pyropheophorbide-a Derivative 5                                                                                                                                                                                   |
| Method:     | Fluorescence Microscopy                                                                                                                                                                                           |
| References: | 92                                                                                                                                                                                                                |
| Structure:  | <chem>CCCCCOC(C)C1=C(C)/C2=C/C3=N/C(C(CC([O-])=O)C3C)=C3CC(=O)C4=C/3NC(/C=C3\N=C(\C=C\1N2)C(C)=C3CC)=C4C</chem>                                                                                                   |
| Name:       | Pyropheophorbide-a Derivative 6                                                                                                                                                                                   |
| Method:     | Fluorescence Microscopy                                                                                                                                                                                           |
| References: | 92                                                                                                                                                                                                                |
| Structure:  | <chem>CCCCCOC(C)C1=C(C)/C2=C/C3=N/C(C(CC([O-])=O)C3C)=C3CC(=O)C4=C/3NC(/C=C3\N=C(\C=C\1N2)C(C)=C3CC)=C4C</chem>                                                                                                   |
| Name:       | LY 219703; N-(4-azidophenylsulfonyl)-N'-(4-chlorophenyl)urea                                                                                                                                                      |
| Method:     | Cell Fractionation                                                                                                                                                                                                |
| References: | 533                                                                                                                                                                                                               |
| Structure:  | <chem>[O-]S(=O)(=NC(=O)Nc1ccc(Cl)cc1)c1ccc(cc1)N=[N+]=[N-]</chem>                                                                                                                                                 |
| Name:       | LCL-30                                                                                                                                                                                                            |
| Method:     | Pharmacological Effect                                                                                                                                                                                            |
| References: | 206                                                                                                                                                                                                               |
| Structure:  | <chem>CCCCCCCCCCCCCCCC(=O)NC(CO)C(O)\C=C\CCCCCCCCCCCC</chem>                                                                                                                                                      |
| Name:       | Bacteriochlorin Derivative 16                                                                                                                                                                                     |
| Method:     | Fluorescence Microscopy                                                                                                                                                                                           |
| References: | 532                                                                                                                                                                                                               |
| Structure:  | <chem>CCc1c(C)c2cc3nc(C(CCC(=O)OC)C3C)c3CC(=O)c4c(C)c(cc5nc(cc1[nH]2)C1(C)C(C(=O)OC)C(=CC=C51)C(=O)OC)[nH]c34</chem>                                                                                              |
| Name:       | Bacteriochlorin Derivative 17                                                                                                                                                                                     |
| Method:     | Fluorescence Microscopy                                                                                                                                                                                           |
| References: | 532                                                                                                                                                                                                               |
| Structure:  | <chem>CCc1c(C)c2cc3nc(C(CCC(=O)OC)C3C)c(CC</chem>                                                                                                                                                                 |

|             |                                                                                                                                                                 |
|-------------|-----------------------------------------------------------------------------------------------------------------------------------------------------------------|
| Structure:  | <chem>(=O)OC)c3[nH]c(cc4nc(cc1[nH]2)C1(C)C(C(=O)OC)C(=CC=C41)C(=O)OC)c(C)c3C(=O)OC</chem>                                                                       |
| Name:       | Bacteriochlorin Derivative 18                                                                                                                                   |
| Method:     | Fluorescence Microscopy                                                                                                                                         |
| References: | 532                                                                                                                                                             |
| Structure:  | <chem>CCc1c(C)c2cc3nc(C(CCC(=O)OC)C3C)c(C(=O)OC)c3[nH]c(cc4nc(cc1[nH]2)C1(C)C(C(=O)OC)C(=CC=C41)C(=O)OC)c(C)c3C(=O)OC</chem>                                    |
| Name:       | Bacteriochlorin Derivative 19                                                                                                                                   |
| Method:     | Fluorescence Microscopy                                                                                                                                         |
| References: | 532                                                                                                                                                             |
| Structure:  | <chem>CCCCCN1C(=O)c2c3nc(cc4[nH]c(cc5nc(cc6[nH]c2c(C1=O)c6C)C1=CC=C(C(C(=O)OC)C51C)C(=O)OC)c(CC)c4C)[C@H](C)C3CC(=O)OC</chem>                                   |
| Name:       | Bacteriochlorin Derivative 20                                                                                                                                   |
| Method:     | Fluorescence Microscopy                                                                                                                                         |
| References: | 532                                                                                                                                                             |
| Structure:  | <chem>CCc1c(C)c2cc3nc(C(CCC(=O)OC)C3C)c3C(=O)N(Cc4cc(cc4)C(F)(F)F)C(F)(F)F)C(=O)c4c(C)c(cc5nc(cc1[nH]2)C1(C)C(C(=O)OC)C(=CC=C51)C(=O)OC)[nH]c34</chem>          |
| Name:       | POR10; 5,10,15,20-tetrakis(1-decylpyridinium-4-yl)-21H,23H-porphyrin tetrabromide                                                                               |
| Method:     | Pharmacological Effect                                                                                                                                          |
| References: | 231                                                                                                                                                             |
| Structure:  | <chem>CCCCCCCCC[n+](c1ccc(cc1)-c1c2ccc(n2)c(-c2cc[n+](CCCCCCCCC)cc2)c2ccc([nH]2)c(-c2cc[n+](CCCCCCCCC)cc2)c2ccc(n2)c(-c2cc[n+](CCCCCCCCC)cc2)c2ccc1[nH]2</chem> |
| Name:       | Pyridoxal 5'-Phosphate                                                                                                                                          |
| Method:     | Uptake/Binding                                                                                                                                                  |
| References: | 243                                                                                                                                                             |
| Structure:  | <chem>Cc1ncc(COP([O-])([O-])=O)c(C=O)c1O</chem>                                                                                                                 |
| Name:       | DASPMI; Dimethylaminostyrylmethylpyridinium Iodine                                                                                                              |
| Method:     | Fluorescence Microscopy                                                                                                                                         |
| References: | 244                                                                                                                                                             |
| Structure:  | <chem>CN(C)c1ccc(cc1)\C=C\c1cccc[n+](c1)C</chem>                                                                                                                |
| Name:       | Tetramethylethidium Bromide                                                                                                                                     |
| Method:     | Uptake/Binding                                                                                                                                                  |
| References: | 246                                                                                                                                                             |
| Structure:  | <chem>CC[n+](c(-c2ccccc2)c2cc(N)ccc2c2c(C)c(C)(cc12)N(C)C</chem>                                                                                                |
| Name:       | Betaine B                                                                                                                                                       |
| Method:     | Uptake/Binding                                                                                                                                                  |
| References: | 246                                                                                                                                                             |
| Structure:  | <chem>CCO[n+](c(-</chem>                                                                                                                                        |



|             |                                                                                                                                                  |
|-------------|--------------------------------------------------------------------------------------------------------------------------------------------------|
|             | <chem>c2ccccc2)c2cc(N)ccc2c2ccc(O)cc12</chem>                                                                                                    |
| Name:       | PTP1; 2-amino-5H-pyrido[3',2';5,6]thiopyrano[4,3-d]pyrimidine                                                                                    |
| Method:     | Pharmacological Effect                                                                                                                           |
| References: | 250                                                                                                                                              |
| Structure:  | <chem>Nc1ncc2CSc3ncccc3-c2n1</chem>                                                                                                              |
| Name:       | Cyanine Dye Conjugate 4b                                                                                                                         |
| Method:     | Fluorescence Microscopy                                                                                                                          |
| References: | 251                                                                                                                                              |
| Structure:  | <chem>COC(=O)CCCCC[n+](c1)C=C1\Sc2ccc2N1C</chem>                                                                                                 |
| Name:       | Cyanine Dye Conjugate 6b                                                                                                                         |
| Method:     | Fluorescence Microscopy                                                                                                                          |
| References: | 251                                                                                                                                              |
| Structure:  | <chem>COC(=O)CCCCC[n+](c1)C=C/C=C1\Sc2ccc2N1C</chem>                                                                                             |
| Name:       | Cyanine Dye Conjugate 7b                                                                                                                         |
| Method:     | Fluorescence Microscopy                                                                                                                          |
| References: | 251                                                                                                                                              |
| Structure:  | <chem>COC(=O)CCCCC[n+](c1)C=C/C=C2\Sc3ccc3N2C)c2ccccc12</chem>                                                                                   |
| Name:       | Cyanine Dye Conjugate 4c                                                                                                                         |
| Method:     | Fluorescence Microscopy                                                                                                                          |
| References: | 251                                                                                                                                              |
| Structure:  | <chem>CN1\C(Sc2ccccc12)=C/c1cc[n+](CCCCC(=O)NC(Cc2ccccc2)C(=O)NC(CCCNC(N)=[NH2+])C(=O)NC(Cc2ccccc2)C(=O)NC(CCCC[NH3+])C(N)=O)cc1</chem>          |
| Name:       | Cyanine Dye Conjugate 6c                                                                                                                         |
| Method:     | Fluorescence Microscopy                                                                                                                          |
| References: | 251                                                                                                                                              |
| Structure:  | <chem>CN1c2ccccc2S\C1=C/C=C\c1cc[n+](CCCCC(=O)NC(Cc2ccccc2)C(=O)NC(CCCNC(N)=[NH2+])C(=O)NC(Cc2ccccc2)C(=O)NC(CCC[NH3+])C(N)=O)cc1</chem>         |
| Name:       | Cyanine Dye Conjugate 7c                                                                                                                         |
| Method:     | Fluorescence Microscopy                                                                                                                          |
| References: | 251                                                                                                                                              |
| Structure:  | <chem>CN1\C(Sc2ccccc12)=C/C=C\c1cc[n+](CCCCC(=O)NC(Cc2ccccc2)C(=O)NC(CCCNC(N)=[NH2+])C(=O)NC(Cc2ccccc2)C(=O)NC(CCC[NH3+])C(N)=O)c2ccccc12</chem> |
| Name:       | DNCTT                                                                                                                                            |
| Method:     | Pharmacological Effect                                                                                                                           |
| References: | 252                                                                                                                                              |
| Structure:  | <chem>FC(F)(F)c1cc(c(Cl)c(c1)N(=O)=O)N(=O)=O</chem>                                                                                              |
| Name:       | DDT                                                                                                                                              |
| Method:     | Pharmacological Effect                                                                                                                           |
| References: | 253                                                                                                                                              |
| Structure:  | <chem>Clc1ccc(cc1)C(c1ccc(Cl)cc1)C(Cl)(Cl)Cl</chem>                                                                                              |

|             |                                                                                                                         |
|-------------|-------------------------------------------------------------------------------------------------------------------------|
| Name:       | Fusaric Acid                                                                                                            |
| Method:     | Pharmacological Effect                                                                                                  |
| References: | 254                                                                                                                     |
| Structure:  | <chem>CCCCc1ccc(nc1)C([O-])=O</chem>                                                                                    |
| Name:       | MIBG (Meta-Iodobenzylguanidine)                                                                                         |
| Method:     | Pharmacological Effect                                                                                                  |
| References: | 262                                                                                                                     |
| Structure:  | <chem>NC(=[NH2+])NCc1cccc(I)c1</chem>                                                                                   |
| Name:       | Metoclopramide                                                                                                          |
| Method:     | Cell Fractionation                                                                                                      |
| References: | 264                                                                                                                     |
| Structure:  | <chem>CC[NH+](CC)CCNC(=O)c1cc(Cl)c(N)cc1OC</chem>                                                                       |
| Name:       | HIPDM                                                                                                                   |
| Method:     | Cell Fractionation                                                                                                      |
| References: | 265                                                                                                                     |
| Structure:  | <chem>CN(CCC[NH+](C)C)Cc1cc(I)cc(C)c1O</chem>                                                                           |
| Name:       | Ditercalinium                                                                                                           |
| Method:     | Fluorescence Microscopy                                                                                                 |
| References: | 266                                                                                                                     |
| Structure:  | <chem>COc1ccc2[nH]c3ccc4cc[n+](CCC[NH+])5CC(C(C5)C5CC[NH+](CCC[n+])6ccc7ccc8[nH]c9ccc(OC)cc9c8c7c6)CC5)cc4c3c2c1</chem> |
| Name:       | Genistein                                                                                                               |
| Method:     | Pharmacological Effect                                                                                                  |
| References: | 267                                                                                                                     |
| Structure:  | <chem>Oc1ccc(cc1)C1=COc2cc([O-])cc(O)c2C1=O</chem>                                                                      |
| Name:       | Aflatoxin B1                                                                                                            |
| Method:     | Pharmacological Effect                                                                                                  |
| References: | 268                                                                                                                     |
| Structure:  | <chem>COc1cc2OC3OC=CC3c2c2OC(=O)C3=C(CC3=O)c12</chem>                                                                   |
| Name:       | Rubratoxin B                                                                                                            |
| Method:     | Pharmacological Effect                                                                                                  |
| References: | 269                                                                                                                     |
| Structure:  | <chem>CCCCCCC(O)C1C(O)C2=C(CC(CC3=C1C(=O)OC3=O)C(O)C1CC=CC(=O)O1)C(=O)OC2=O</chem>                                      |
| Name:       | FUdRFloxuridine                                                                                                         |
| Method:     | Distr.others                                                                                                            |
| References: | 260                                                                                                                     |
| Structure:  | <chem>OCC1OC(CC1O)N1C=C(F)C(=O)NC1=O</chem>                                                                             |
| Name:       | Pyrrolo(2,3-h)quinolone Compound 10                                                                                     |
| Method:     | Fluorescence Microscopy                                                                                                 |
| References: | 275                                                                                                                     |
| Structure:  | <chem>Cc1cc2C3=C(Cc2n1-c1cccc1)C=C(C(=O)N3)S(=O)(=O)c1cccc1</chem>                                                      |
| Name:       | Pyrrolo(2,3-h)quinolone Compound 11                                                                                     |
| Method:     | Fluorescence Microscopy                                                                                                 |
| References: | 275                                                                                                                     |
| Structure:  | <chem>Cc1cc2C3=C(Cc2n1-</chem>                                                                                          |

|             |                                                                          |
|-------------|--------------------------------------------------------------------------|
|             | <chem>c1cccc1)C=C(C(=O)N3)C(=O)c1cccc1</chem>                            |
| Name:       | Pyrrolo(2,3-h)quinolone Compound 12                                      |
| Method:     | Fluorescence Microscopy                                                  |
| References: | 275                                                                      |
| Structure:  | <chem>Cc1cc2C3=C(Cc2n1-c1cccc1)C=C(C#N)C(=O)[N-]3</chem>                 |
| Name:       | Pyrrolo(2,3-h)quinolone Compound 13                                      |
| Method:     | Fluorescence Microscopy                                                  |
| References: | 275                                                                      |
| Structure:  | <chem>CCOC(=O)C1=CC2=C(NC1=O)c1cc(C)n(c1C2)-c1cccc1</chem>               |
| Name:       | Pyrrolo(2,3-h)quinolone Compound 14                                      |
| Method:     | Fluorescence Microscopy                                                  |
| References: | 275                                                                      |
| Structure:  | <chem>Cc1cc2C3=C(Cc2n1C)C=C(C(=O)N3)S(=O)(=O)c1cccc1</chem>              |
| Name:       | Pyrrolo(2,3-h)quinolone Compound 15                                      |
| Method:     | Fluorescence Microscopy                                                  |
| References: | 275                                                                      |
| Structure:  | <chem>Cc1cc2C3=C(Cc2n1C)C=C(C(=O)N3)C(=O)c1cccc1</chem>                  |
| Name:       | Pyrrolo(2,3-h)quinolone Compound 16                                      |
| Method:     | Fluorescence Microscopy                                                  |
| References: | 275                                                                      |
| Structure:  | <chem>Cc1cc2C3=C(Cc2n1Cc1cccc1)C=C(C(=O)N3)S(=O)(=O)c1cccc1</chem>       |
| Name:       | Pyrrolo(2,3-h)quinolone Compound 17                                      |
| Method:     | Fluorescence Microscopy                                                  |
| References: | 275                                                                      |
| Structure:  | <chem>Cc1cc2C3=C(Cc2n1Cc1cccc1)C=C(C(=O)N3)C(=O)c1cccc1</chem>           |
| Name:       | EPED3                                                                    |
| Method:     | Pharmacological Effect                                                   |
| References: | 277                                                                      |
| Structure:  | <chem>C[NH+](C)CCOc1ccc2[nH]c3c(C)c4ccncc4c(C)c3c2c1</chem>              |
| Name:       | Methylene Blue Derivative                                                |
| Method:     | Fluorescence Microscopy                                                  |
| References: | 283                                                                      |
| Structure:  | <chem>CCON1c2cc3[s+]c4cc5N(OCC)C(C)(C)CC(C)c5cc4nc3cc2C(C)CC1(C)C</chem> |
| Name:       | Rhodamine 800                                                            |
| Method:     | Uptake/Binding                                                           |
| References: | 293                                                                      |
| Structure:  | <chem>N#CC1=C2C=C3CCC[N+]4=C3C(CCC4)=C2Oc2c3CCCN4CCCc(c12)c34</chem>     |
| Name:       | Fluorinated Tetrapyridylporphyrin Analogue 8                             |
| Method:     | Fluorescence Microscopy                                                  |
| References: | 302                                                                      |
| Structure:  | <chem>C[n+]1cccc(c1F)-c1c2ccc(n2)c(-</chem>                              |

|             |                                                                                                                                                                                                                                                                                                                          |
|-------------|--------------------------------------------------------------------------------------------------------------------------------------------------------------------------------------------------------------------------------------------------------------------------------------------------------------------------|
|             | <chem>c2ccc[n+](C)c2F)c2ccc([nH]2)c(-c2ccc[n+](C)c2F)c2ccc(n2)c(-c2ccc[n+](C)c2F)c2ccc1[nH]2</chem>                                                                                                                                                                                                                      |
| Name:       | MitP                                                                                                                                                                                                                                                                                                                     |
| Method:     | Fluorescence Microscopy                                                                                                                                                                                                                                                                                                  |
| References: | 309                                                                                                                                                                                                                                                                                                                      |
| Structure:  | <chem>CCC(C)C([NH3+])C(=O)NC(CC(N)=O)C(=O)NC(CC(C)C)C(=O)NC(CCCC[NH3+])C(=O)NC(CCCC[NH3+])C(=O)NC(CC(C)C)C(=O)NC(C)C(=O)NC(CCCC[NH3+])C(=O)NC(CC(C)C)C(=O)NC(CCCC[NH3+])C(=O)NC(CCCC[NH3+])C(=O)NC(C(C)CC)C(=O)NC(CC(C)C)C(N)=O</chem>                                                                                   |
| Name:       | Z-Gly-RGD-f-mitP                                                                                                                                                                                                                                                                                                         |
| Method:     | Fluorescence Microscopy                                                                                                                                                                                                                                                                                                  |
| References: | 309                                                                                                                                                                                                                                                                                                                      |
| Structure:  | <chem>CCC(C)C(NC(=O)C(Cc1cccc1)NC(=O)C(C([O-])=O)NC(=O)CNC(=O)C(CCCNC(N)=[NH2+])NC(=O)CNC(=O)OCc1cccc1)C(=O)NC(C(C(N)=O)C(=O)NC(CC(C)C)C(=O)NC(CCCC[NH3+])C(=O)NC(CCCC[NH3+])C(=O)NC(CC(C)C)C(=O)NC(C)C(=O)NC(CCCC[NH3+])C(=O)NC(CC(C)C)C(=O)NC(C(C)C)C(=O)NC(CCCC[NH3+])C(=O)NC(CCCC[NH3+])C(=O)NC(CC(C)C)C(N)=O</chem> |
| Name:       | Coenzyme Q9                                                                                                                                                                                                                                                                                                              |
| Method:     | Cell Fractionation                                                                                                                                                                                                                                                                                                       |
| References: | 319                                                                                                                                                                                                                                                                                                                      |
| Structure:  | <chem>COC1=C(OC)C(=O)C(C\C=C(/)CC\C=C(/)CC\C=C(/)CC\C=C(/)CC\C=C(/)CC\C=C(/)CC\C=C(/)CC\C=C(/)CC\C=C(/)CC=C(C)C)=C(C)C1=O</chem>                                                                                                                                                                                         |
| Name:       | Conenzyme Q10                                                                                                                                                                                                                                                                                                            |
| Method:     | Cell Fractionation                                                                                                                                                                                                                                                                                                       |
| References: | 319                                                                                                                                                                                                                                                                                                                      |
| Structure:  | <chem>COC1=C(OC)C(=O)C(C\C=C(/)CC\C=C(/)CC\C=C(/)CC\C=C(/)CC\C=C(/)CC\C=C(/)CC\C=C(/)CC\C=C(/)CC\C=C(/)CC=C(C)C)=C(C)C1=O</chem>                                                                                                                                                                                         |
| Name:       | (1"-pyrene butyl)-2-rhodamine ester                                                                                                                                                                                                                                                                                      |
| Method:     | Fluorescence Microscopy                                                                                                                                                                                                                                                                                                  |
| References: | 324                                                                                                                                                                                                                                                                                                                      |
| Structure:  | <chem>Nc1ccc2c(OC3=CC(=[NH2+])C=CC3=C2c2ccc(c2)C(=O)OCCCC2ccc3ccc4cccc5ccc2c3c45)c1</chem>                                                                                                                                                                                                                               |
| Name:       | Pyocyanin                                                                                                                                                                                                                                                                                                                |
| Method:     | Fluorescence Microscopy                                                                                                                                                                                                                                                                                                  |
| References: | 325                                                                                                                                                                                                                                                                                                                      |
| Structure:  | <chem>CN1C2=CC=CC(=O)C2=Nc2cccc12</chem>                                                                                                                                                                                                                                                                                 |
| Name:       | TEMPO                                                                                                                                                                                                                                                                                                                    |
| Method:     | Fluorescence Microscopy                                                                                                                                                                                                                                                                                                  |
| References: | 348                                                                                                                                                                                                                                                                                                                      |
| Structure:  | <chem>CC(=C)c1cc(N)C(SCc2ccc(C[P+](c3cccc3)c</chem>                                                                                                                                                                                                                                                                      |

|             |                                                                                                                          |
|-------------|--------------------------------------------------------------------------------------------------------------------------|
|             | <chem>3ccccc3)c3ccccc3)cc2)=N/C2CC(C)(C)N(O)C(C)(C)C2)ccc1C1=C2C=CC(=O)C=C2Oc2cc(O)ccc12</chem>                          |
| Name:       | 5-Aminofluorescein conjugated 9-Hydroxystearic Acid                                                                      |
| Method:     | Fluorescence Microscopy                                                                                                  |
| References: | 329                                                                                                                      |
| Structure:  | <chem>CCCCCCCCC(O)CCCCCCCC(=O)Nc1ccc2c(c1)C(=O)OC21c2ccc(O)cc2Oc2cc(O)ccc12</chem>                                       |
| Name:       | CDS1                                                                                                                     |
| Method:     | Fluorescence Microscopy                                                                                                  |
| References: | 332                                                                                                                      |
| Structure:  | <chem>CCc1c(CC)c2cc3c(CC)c(CC)c4n3[Cu]n3c(cc1n2)c(CC)c(CC)c3c(\C=[N+](\C)C)c1nc2c(ccc42)C1(CC)CC</chem>                  |
| Name:       | MTT; 3-(4,5-dimethylthiazol-2-yl)-2,5-diphenyltetrazolium bromide                                                        |
| Method:     | Pharmacological Effect                                                                                                   |
| References: | 333                                                                                                                      |
| Structure:  | <chem>Cc1nc(sc1C)-n1nc(n[n+])1-c1ccccc1)-c1ccccc1</chem>                                                                 |
| Name:       | 2-methyl-4-dimethylaminoazobenzene                                                                                       |
| Method:     | Cell Fractionation                                                                                                       |
| References: | 534                                                                                                                      |
| Structure:  | <chem>CN(C)c1ccc(\N=N\c2ccccc2)c(C)c1</chem>                                                                             |
| Name:       | DMSP-Coumarin Derivative 4                                                                                               |
| Method:     | Fluorescence Microscopy                                                                                                  |
| References: | 351                                                                                                                      |
| Structure:  | <chem>CCCCCCCCCCCC\C=C\C(OC(=O)C1Cc2cc(cc2OC1=O)N(CC)CC)C(CO)[NH+](C)C</chem>                                            |
| Name:       | DMSP-Coumarin Derivative 5                                                                                               |
| Method:     | Fluorescence Microscopy                                                                                                  |
| References: | 351                                                                                                                      |
| Structure:  | <chem>CCCCCCCCCCCC\C=C\C(O)C(COC(=O)C1Cc2ccc(cc2OC1=O)N(CC)CC)[NH+](C)C</chem>                                           |
| Name:       | MitoPY1                                                                                                                  |
| Method:     | Fluorescence Microscopy                                                                                                  |
| References: | 355                                                                                                                      |
| Structure:  | <chem>CC1(C)OB(OC1(C)C)c1ccc2c(Oc3ccc(cc3C2)OC(=O)c3ccccc23)N2CC[NH+](CCCC[P+](c3ccccc3)(c3ccccc3)c3ccccc3)CC2)c1</chem> |
| Name:       | 2-Quinolinecarboxamide Derivative 6a                                                                                     |
| Method:     | Uptake/Binding                                                                                                           |
| References: | 358                                                                                                                      |
| Structure:  | <chem>CN(Cc1ccccc1)C(=O)c1nc2ccccc2c(-c2ccccc2)c1CN1CC[NH2+][CC1</chem>                                                  |
| Name:       | 2-Quinolinecarboxamide Derivative 6b                                                                                     |
| Method:     | Uptake/Binding                                                                                                           |
| References: | 358                                                                                                                      |
| Structure:  | <chem>CN(Cc1ccccc1)C(=O)c1nc2ccccc2c(-c2ccccc2)c1CN1CC[NH+](CC1)Cc1c(nc2ccc2c1-c1ccccc1)C(=O)N(C)Cc1ccccc1</chem>        |

|             |                                                                                                              |
|-------------|--------------------------------------------------------------------------------------------------------------|
| Name:       | 2-Quinolinecarboxamide Derivative 6c                                                                         |
| Method:     | Uptake/Binding                                                                                               |
| References: | 358                                                                                                          |
| Structure:  | <chem>CN(Cc1ccccc1)C(=O)c1nc2ccccc2c(-c2ccccc2)c1CN1CCN(CC1)C(=O)Nc1ccccc1</chem>                            |
| Name:       | 2-Quinolinecarboxamide Derivative 6d                                                                         |
| Method:     | Uptake/Binding                                                                                               |
| References: | 358                                                                                                          |
| Structure:  | <chem>CN(Cc1ccccc1)C(=O)c1nc2ccccc2c(-c2ccccc2)c1C[NH+]1CCN(CCN2C(=O)c3ccc cc3C2=O)CC1</chem>                |
| Name:       | 2-Quinolinecarboxamide Derivative 6e                                                                         |
| Method:     | Uptake/Binding                                                                                               |
| References: | 358                                                                                                          |
| Structure:  | <chem>CN(Cc1ccccc1)C(=O)c1nc2ccccc2c(-c2ccccc2)c1C[NH+]1CCN(CCCN2C(=O)c3ccc cc3C2=O)CC1</chem>               |
| Name:       | 2-Quinolinecarboxamide Derivative 6f                                                                         |
| Method:     | Uptake/Binding                                                                                               |
| References: | 358                                                                                                          |
| Structure:  | <chem>CN(Cc1ccccc1)C(=O)c1nc2ccccc2c(-c2ccccc2)c1CN1CC[NH+](CCCCN2C(=O)c3 cccc3C2=O)CC1</chem>               |
| Name:       | 2-Quinolinecarboxamide Derivative 6j                                                                         |
| Method:     | Uptake/Binding                                                                                               |
| References: | 358                                                                                                          |
| Structure:  | <chem>CN(Cc1ccccc1)C(=O)c1nc2ccccc2c(-c2ccccc2)c1C[NH+]1CCN(CCC[N+])23CCS[ Re--]22(O)SCCN2C(=O)C3)CC1</chem> |
| Name:       | 2-Quinolinecarboxamide Derivative 6m                                                                         |
| Method:     | Uptake/Binding                                                                                               |
| References: | 358                                                                                                          |
| Structure:  | <chem>CN(Cc1ccccc1)C(=O)c1nc2ccccc2c(-c2ccccc2)c1CN1CCN(CC1)C(=O)C[N+])12C CS[Re--]11(O)SCCN1C(=O)C2</chem>  |
| Name:       | N-methylated imidazopyridine-acetamide Derivative 7                                                          |
| Method:     | Uptake/Binding                                                                                               |
| References: | 359                                                                                                          |
| Structure:  | <chem>CN(C(=C)Cc1c(nc2c(Cl)cc(Cl)cn12)-c1ccc(Cl)cc1)c1ccccc1</chem>                                          |
| Name:       | SSR180575                                                                                                    |
| Method:     | Uptake/Binding                                                                                               |
| References: | 362                                                                                                          |
| Structure:  | <chem>CN(C)C(=O)CC1=NN(C(=O)c2c1c1ccc(Cl)cc 1n2C)c1ccccc1</chem>                                             |
| Name:       | Alpidem                                                                                                      |
| Method:     | Pharmacological Effect                                                                                       |
| References: | 535                                                                                                          |
| Structure:  | <chem>CCCN(CCC)C(=O)Cc1c(nc2ccc(Cl)cn12)-c1ccc(Cl)cc1</chem>                                                 |

|             |                                                                         |
|-------------|-------------------------------------------------------------------------|
| Name:       | DAA1097                                                                 |
| Method:     | Uptake/Binding                                                          |
| References: | 365                                                                     |
| Structure:  | <chem>CC(C)Oc1cccc1CN(C(C)=O)c1ccc(Cl)cc1Oc1cccc1</chem>                |
| Name:       | DAA1106                                                                 |
| Method:     | Uptake/Binding                                                          |
| References: | 365                                                                     |
| Structure:  | <chem>COc1ccc(OC)c(CN(C(C)=O)c2cc(F)ccc2Oc2cccc2)c1</chem>              |
| Name:       | Pyrrolobenzoxazepine Derivative 17f                                     |
| Method:     | Uptake/Binding                                                          |
| References: | 366                                                                     |
| Structure:  | <chem>CCON(OCC)C(=O)OC1=C(Oc2cccc2-n2cccc12)c1cccc1</chem>              |
| Name:       | Pyrrolobenzoxazepine Derivative 17j                                     |
| Method:     | Uptake/Binding                                                          |
| References: | 366                                                                     |
| Structure:  | <chem>CCON(OCC)C(=O)OC1=C(Oc2cccc2-n2cccc12)c1ccc(C)cc1</chem>          |
| Name:       | Dipyridamole                                                            |
| Method:     | Uptake/Binding                                                          |
| References: | 368                                                                     |
| Structure:  | <chem>CC(=O)OCCN(CCO)c1nc(N2CCCC2)c2nc(nc(N3CCCC3)c2n1)N(CCO)CCO</chem> |
| Name:       | RA-25                                                                   |
| Method:     | Uptake/Binding                                                          |
| References: | 368                                                                     |
| Structure:  | <chem>CNc1nc(NC)c2nc(NC)nc(NC)c2n1</chem>                               |
| Name:       | GBLD470                                                                 |
| Method:     | Uptake/Binding                                                          |
| References: | 370                                                                     |
| Structure:  | <chem>C1C1Nn2c(C=C1)nc(-c1ccc(cc1)-c1cccc1)c2CNC(=O)c1cccc1</chem>      |
| Name:       | GBLD471                                                                 |
| Method:     | Uptake/Binding                                                          |
| References: | 370                                                                     |
| Structure:  | <chem>CC(=O)NCc1c(nc2C=CC(Cl)Nn12)-c1ccc(cc1)-c1cccc1</chem>            |
| Name:       | GBLD696                                                                 |
| Method:     | Uptake/Binding                                                          |
| References: | 370                                                                     |
| Structure:  | <chem>C1C1Nn2c(C=C1)nc(\C=C\c1cccc1)c2CNC(=O)c1cccc1</chem>             |
| Name:       | GBLD700                                                                 |
| Method:     | Uptake/Binding                                                          |
| References: | 370                                                                     |
| Structure:  | <chem>CC(C)(C)c1ccc(cc1)-c1nc2C=CC(Cl)Nn2c1CNC(=O)c1cccc1</chem>        |

|             |                                                                                                                                                                                                                                                                                       |
|-------------|---------------------------------------------------------------------------------------------------------------------------------------------------------------------------------------------------------------------------------------------------------------------------------------|
| Name:       | GBLD703                                                                                                                                                                                                                                                                               |
| Method:     | Uptake/Binding                                                                                                                                                                                                                                                                        |
| References: | 370                                                                                                                                                                                                                                                                                   |
| Structure:  | <chem>CC(C)(C)c1ccc(cc1)-c1nc2C=CC(Cl)Nn2c1CNC(=O)c1ccc(F)cc1</chem>                                                                                                                                                                                                                  |
| Name:       | Imidazopyridine-7-nitrofurazan Conjugate 10                                                                                                                                                                                                                                           |
| Method:     | Fluorescence Microscopy                                                                                                                                                                                                                                                               |
| References: | 373                                                                                                                                                                                                                                                                                   |
| Structure:  | <chem>Clc1ccc(cc1)-c1nc2c(Cl)cc(Cl)cn2c1CC(=O)N(CCCCCNc1ccc(c2nonc12)N(=O)=O)Cc1cccc1</chem>                                                                                                                                                                                          |
| Name:       | Glucosylated Chlorin Derivative 7                                                                                                                                                                                                                                                     |
| Method:     | Fluorescence Microscopy                                                                                                                                                                                                                                                               |
| References: | 405                                                                                                                                                                                                                                                                                   |
| Structure:  | <chem>OC[C@H]1O[C@@H](Oc2cccc(c2)-c2c3CCc([nH]3)c(-c3ccc(O[C@@H]4O[C@H](CO)[C@@H](O)[C@@H](O)[C@H]4O)c3)c3ccc(n3)c(-c3ccc(O[C@@H]4O[C@H](CO)[C@@H](O)[C@@H](O)[C@H]4O)c3)c3ccc([nH]3)c(-c3ccc(O[C@@H]4O[C@H](CO)[C@@H](O)[C@@H](O)[C@H]4O)c3)c3ccc2n3)[C@H](O)[C@H](O)[C@@H]1O</chem> |
| Name:       | Glucosylated Chlorin Derivative 9                                                                                                                                                                                                                                                     |
| Method:     | Fluorescence Microscopy                                                                                                                                                                                                                                                               |
| References: | 405                                                                                                                                                                                                                                                                                   |
| Structure:  | <chem>OC[C@H]1O[C@@H](Oc2cccc(c2)-c2c3ccc(n3)c(-c3ccc(O[C@@H]4O[C@H](CO)[C@@H](O)[C@@H](O)[C@H]4O)c3)c3ccc([nH]3)c(-c3ccc(O[C@@H]4O[C@H](CO)[C@@H](O)[C@@H](O)[C@H]4O)c3)c3ccc2[nH]3)[C@H](O)[C@H](O)[C@@H]1O</chem>                                                                  |
| Name:       | Porphyrazine 16 <sup>0</sup>                                                                                                                                                                                                                                                          |
| Method:     | Fluorescence Microscopy                                                                                                                                                                                                                                                               |
| References: | 403                                                                                                                                                                                                                                                                                   |
| Structure:  | <chem>CC(C)Oc1ccc(OC(C)C)c2c3nc4nc(nc5[nH]c(nc6nc(nc([nH]3)c12)c(SCCOCCOCCO)c6SCCOCCOCCO)c1c(OC(C)C)ccc(OC(C)C)c51)c(SCCOCCOCCO)c4SCCOCCOCCO</chem>                                                                                                                                   |
| Name:       | FCp6                                                                                                                                                                                                                                                                                  |
| Method:     | Fluorescence Microscopy                                                                                                                                                                                                                                                               |
| References: | 429                                                                                                                                                                                                                                                                                   |
| Structure:  | <chem>CCC1=C(C)C2=NC1=CC1=C(C)C(C([O-])=O)=C(N1)C(C([O-])=O)=C1N=C(C=C3NC(=C2)C(C=O)=C3C)C(C)=C1CCC([O-])=O</chem>                                                                                                                                                                    |
| Name:       | Biotinylated Glyfoline                                                                                                                                                                                                                                                                |
| Method:     | histo                                                                                                                                                                                                                                                                                 |
| References: | 431                                                                                                                                                                                                                                                                                   |

|             |                                                                                                                                                       |
|-------------|-------------------------------------------------------------------------------------------------------------------------------------------------------|
| Structure:  | <chem>COC1=C(OC)C(OC)=C(OC)C2C1N(C)c1c(O C)c(OCCCCNC(=O)CCCNC(=O)CCCCC3SC C4(C)NC(=O)NC34C)ccc1C2=O</chem>                                            |
| Name:       | Methyl Pyropheophorbide-a Derivative 7                                                                                                                |
| Method:     | Fluorescence Microscopy                                                                                                                               |
| References: | 537                                                                                                                                                   |
| Structure:  | <chem>CCCCCOC(C)C1=C(C)/C2=C/C3=N/C(C(C CC(=O)OC)C3C)=C3CC(=O)C4=C/3NC(/C=C3\N=C(\C=C\1N2)C(C)=C\3CC)=C4C</chem>                                      |
| Name:       | Methyl Pyropheophorbide-a Derivative 8                                                                                                                |
| Method:     | Fluorescence Microscopy                                                                                                                               |
| References: | 537                                                                                                                                                   |
| Structure:  | <chem>CCC1=C(C)C2=N\C\1=C/C1=C(C)C3=C4N1[ In](Cl)N1C(=C/C5=N/C(C(CCC(=O)OC)C5C )=C\4CC3=O)\C(C)=C(C(C)OCCOCCOCCO C)/C1=C/2</chem>                     |
| Name:       | CP                                                                                                                                                    |
| Method:     | Fluorescence Microscopy                                                                                                                               |
| References: | 443                                                                                                                                                   |
| Structure:  | <chem>COc1cc(OC)c(c(OC)c1)-c1c2CCc([nH]2)c(- c2ccc(cc2)[N+](C)(C)C)c2ccc(n2)c(- c2c(OC)cc(OC)cc2OC)c2ccc([nH]2)c(- c2c(OC)cc(OC)cc2OC)c2ccc1n2</chem> |
| Name:       | Fluorinated Bacteriopurpurinimide Derivative 3                                                                                                        |
| Method:     | Fluorescence Microscopy                                                                                                                               |
| References: | 444                                                                                                                                                   |

|             |                                                                                                                                                                                  |
|-------------|----------------------------------------------------------------------------------------------------------------------------------------------------------------------------------|
| Structure:  | <chem>CCC1C(C)C2=C/C3NC(/C=C4\N=C(C(CCC( =O)OC)C4C)C4=C5NC(=C\C1=N\2)/C(C)=C 5C(=O)N(Cc1cc(cc(c1)C(F)(F)F)C(F)(F)F)C4 =O)C(C)=C3C(C)[NH2+][Cc1cc(cc(c1)C(F)(F )F)C(F)(F)F</chem> |
| Name:       | Hexadecanedioic Acid                                                                                                                                                             |
| Method:     | Pharmacological Effect                                                                                                                                                           |
| References: | 455                                                                                                                                                                              |
| Structure:  | <chem>[O-]C(=O)CCCCCCCCCCCCCCC([O-])=O</chem>                                                                                                                                    |
| Name:       | PBR Fluorescent Derivative 4                                                                                                                                                     |
| Method:     | Fluorescence Microscopy                                                                                                                                                          |
| References: | 471                                                                                                                                                                              |
| Structure:  | <chem>O=C(Cc1c([nH]c2cccc12)- c1cccc1)NCCCCCNc1ccc(c2nonc12)N(=O )=O</chem>                                                                                                      |
| Name:       | Pi-Extended Squaraines Derivative 1b                                                                                                                                             |
| Method:     | Fluorescence Microscopy                                                                                                                                                          |
| References: | 507                                                                                                                                                                              |
| Structure:  | <chem>COCCOCCOCn1c(ccc1C1=C([O- ])\C(C1=O)=C1/C=CC(\C=N\N(C)C)=[N+]/1 COCCOCCOC)\C=N\N(C)C</chem>                                                                                |
| Name:       | Toluidine blue O                                                                                                                                                                 |
| Method:     | Distr.others                                                                                                                                                                     |
| References: | 185                                                                                                                                                                              |
| Structure:  | <chem>CC1=CC2=C(SC3=C/C(/C=CC3=N2)=[N+]/( C)C=C1N</chem>                                                                                                                         |

**Supplemental Table 3: The chemical compounds with reported subcellular localization site in the nucleus.** References information is available in Supplemental Table 10. Structure is presented as the *Simplified Molecular Input Line Entry Specification string* of the major microspecies at pH 7.4, as calculated by ChemAxon.

|             |                                                                                        |                                             |  |
|-------------|----------------------------------------------------------------------------------------|---------------------------------------------|--|
| Name:       | DAPI                                                                                   |                                             |  |
| Method:     | Fluorescence Microscopy                                                                |                                             |  |
| References: | 4                                                                                      |                                             |  |
| Structure:  | <chem>NC(=[NH2+])c1ccc(cc1)-c1cc2ccc(cc2[nH]1)C(N)=[NH2+]</chem>                       |                                             |  |
| Name:       | Ethidium bromide                                                                       |                                             |  |
| Method:     | Fluorescence Microscopy                                                                |                                             |  |
| References: | 4, 163                                                                                 |                                             |  |
| Structure:  | <chem>CC[n+]1c(-c2ccccc2)c2cc(N)ccc2c2ccc(N)cc12</chem>                                |                                             |  |
| Name:       | E1374; Ethidium monoazide bromide; EMA                                                 |                                             |  |
| Method:     | Fluorescence Microscopy                                                                |                                             |  |
| References: | 600                                                                                    |                                             |  |
| Structure:  | <chem>CC[n+]1c(-c2ccccc2)c2cc(ccc2c2ccc(N)cc12)N=[N+]=[N-]</chem>                      |                                             |  |
| Name:       | L7595; LDS 751                                                                         |                                             |  |
| Method:     | Fluorescence Microscopy                                                                |                                             |  |
| References: | 602                                                                                    |                                             |  |
| Structure:  | <chem>CC[n+]1c(\C=C\C=C/C2ccc(cc2)N(C)C)ccc2cc(ccc12)N(C)C</chem>                      |                                             |  |
| Name:       | H22845; hydroxystilbamidine, methanesulfonate                                          |                                             |  |
| Method:     | Fluorescence Microscopy                                                                |                                             |  |
| References: | 603                                                                                    |                                             |  |
| Structure:  | <chem>NC(=[NH2+])c1ccc(cc1)\C=C\c1ccc(cc1O)C(N)= [NH2+]</chem>                         |                                             |  |
| Name:       | H1398; Pentahydrate (bis-benzimide); Hoechst 33258                                     |                                             |  |
| Method:     | Fluorescence Microscopy                                                                |                                             |  |
| References: | 147                                                                                    |                                             |  |
| Structure:  | <chem>C[NH+]1CCN(CC1)c1ccc2nc([nH]c2c1)-</chem>                                        | <chem>c1ccc2[nH]c(nc2c1)-c1ccc(O)cc1</chem> |  |
| Name:       | H21486; Hoechst 34580                                                                  |                                             |  |
| Method:     | Fluorescence Microscopy                                                                |                                             |  |
| References: | 658                                                                                    |                                             |  |
| Structure:  | <chem>CN(C)c1ccc(cc1)-c1nc2cc(ccc2[nH]1)-c1nc2ccc(cc2[nH]1)N1CC[NH+](C)CC1</chem>      |                                             |  |
| Name:       | H1399; trihydrochloride, trihydrate; Hoechst 33342                                     |                                             |  |
| Method:     | Fluorescence Microscopy                                                                |                                             |  |
| References: | 630                                                                                    |                                             |  |
| Structure:  | <chem>CCOc1ccc(cc1)-c1nc2cc(ccc2[nH]1)-c1nc2ccc(cc2[nH]1)N1CC[NH+](C)CC1</chem>        |                                             |  |
| Name:       | P3581; PO-PRO™ 1 iodide (435/455)                                                      |                                             |  |
| Method:     | Fluorescence Microscopy                                                                |                                             |  |
| References: | 631                                                                                    |                                             |  |
| Structure:  | <chem>C[n+]1c(C=C2C=CN(CCC[N+](C)(C)C)C=C2)oc2ccccc12</chem>                           |                                             |  |
| Name:       | N21485; Hoechst S769121, trihydrochloride, trihydrate; Nuclear yellow                  |                                             |  |
| Method:     | Fluorescence Microscopy                                                                |                                             |  |
| References: | 670                                                                                    |                                             |  |
| Structure:  | <chem>C[NH+]1CCN(CC1)c1ccc2nc([nH]c2c1)-c1ccc2[nH]c(nc2c1)-c1ccc(cc1)S(N)(=O)=O</chem> |                                             |  |
| Name:       | P3585; PO-PRO™-3 iodide (539/567)                                                      |                                             |  |
| Method:     | NA                                                                                     |                                             |  |
| References: | Invi                                                                                   |                                             |  |
| Structure:  | <chem>C[n+]1c(\C=C\C=C2C=CN(CCC[N+](C)(C)C)C=C2)oc2ccccc12</chem>                      |                                             |  |
| Name:       | Y3603; YO-PRO®-1 iodide (491/509)                                                      |                                             |  |
| Method:     | Fluorescence Microscopy                                                                |                                             |  |

|             |                                                                                                                |
|-------------|----------------------------------------------------------------------------------------------------------------|
| References: | 71                                                                                                             |
| Structure:  | <chem>C[n+](c1c(oc2ccccc12)\C=C1\C=CN(CCC[N+](C)(C)C)c2ccccc12</chem>                                          |
| Name:       | T3602; TO-PRO®-1 iodide (515/531)                                                                              |
| Method:     | Fluorescence Microscopy                                                                                        |
| References: | 684                                                                                                            |
| Structure:  | <chem>C[n+](c1c(sc2ccccc12)\C=C1/C=CN(CCC[N+](C)(C)C)c2ccccc12</chem>                                          |
| Name:       | Y3607; YO-PRO®-3 iodide (612/631)                                                                              |
| Method:     | Fluorescence Microscopy                                                                                        |
| References: | 608                                                                                                            |
| Structure:  | <chem>C[n+](c1c(\C=C/C=C2/C=CN(CCC[N+](C)(C)C)c3ccccc23)oc2ccccc12</chem>                                      |
| Name:       | P1304MP; Propidium Iodide                                                                                      |
| Method:     | Fluorescence Microscopy                                                                                        |
| References: | 71                                                                                                             |
| Structure:  | <chem>CC[N+](C)(CC)CCC[n+](c1c(-c2ccccc2)c2cc(N)ccc2c2ccc(N)cc12</chem>                                        |
| Name:       | T3605; TO-PRO®-3 iodide (642/661)                                                                              |
| Method:     | Fluorescence Microscopy                                                                                        |
| References: | 71                                                                                                             |
| Structure:  | <chem>C[n+](c1c(\C=C\C=C2/C=CN(CCC[N+](C)(C)C)c3ccccc23)sc2ccccc12</chem>                                      |
| Name:       | A666; Bis-(6-chloro-2-methoxy-9-acridinyl) spermine; Acridine homodimer                                        |
| Method:     | Fluorescence Microscopy                                                                                        |
| References: | 723                                                                                                            |
| Structure:  | <chem>COc1ccc2[nH+](c3cc(Cl)ccc3c(NCCC[NH2+])CCC[NH2+])CCCNc3c4ccc(Cl)cc4[nH+](c4ccc(OC)cc34)c2c1</chem>       |
| Name:       | T7596; TO-PRO®-5 iodide (745/770)                                                                              |
| Method:     | Uptake/Binding                                                                                                 |
| References: | 635                                                                                                            |
| Structure:  | <chem>C[n+](c1c(\C=C\C=C/C=C2\C=CN(CCC[N+](C)(C)C)c3ccccc23)sc2ccccc12</chem>                                  |
| Name:       | E1169; Ethidium homodimer-1; EthD-1                                                                            |
| Method:     | Fluorescence Microscopy                                                                                        |
| References: | 613                                                                                                            |
| Structure:  | <chem>Nc1ccc2c(c1)c(-c1ccccc1)[n+](CCC[NH2+])CCC[n+](c1c(-c3ccccc3)c3cc(N)ccc3c3ccc(N)cc13)c1cc(N)cc2c1</chem> |
| Name:       | P3580; POPO™ 1 iodide (434/456)                                                                                |
| Method:     | Uptake/Binding                                                                                                 |
| References: | 650                                                                                                            |
| Structure:  | <chem>C[n+](c1c(C=C2C=CN(CCC[N+](C)(C)CCC[N+](C)(C)CCCN3C=CC(C=C3)=Cc3oc4ccccc4[n+](3C)C=C2)oc2ccccc12</chem>  |
| Name:       | B3586; BOBO™3 iodide (570/602)                                                                                 |
| Method:     | Fluorescence Microscopy                                                                                        |
| References: | 651                                                                                                            |

|             |                                                                                                                                                                                                  |
|-------------|--------------------------------------------------------------------------------------------------------------------------------------------------------------------------------------------------|
| Structure:  | <chem>C[n+](c1c(\C=C\C=C2C=CN(CCC[N+](C)(C)C)CC[N+](C)(C)CCCN3C=CC(C=C3)=C/C=C\Cc3sc4ccccc4[n+](3C)C=C2)sc2ccccc12</chem>                                                                        |
| Name:       | A7592; Actinomycin D                                                                                                                                                                             |
| Method:     | Distr.others                                                                                                                                                                                     |
| References: | 620                                                                                                                                                                                              |
| Structure:  | <chem>CC(C)C1NC(=O)C(NC(=O)c2ccc(C)c3OC4=C(C)C(=O)C(N)=C(C(=O)NC5C(C)OC(=O)C(C)(C)N(C)C(=O)CN(C)C(=O)C6CCCN6C(=O)C(NC5=O)C(C)C)C4=Nc23)C(C)OC(=O)C(C)(C)N(C)C(=O)CN(C)C(=O)C2CCCN2C1=O</chem>    |
| Name:       | A1310; 7-aminoactinomycin D; 7-AAD                                                                                                                                                               |
| Method:     | Uptake/Binding                                                                                                                                                                                   |
| References: | 621                                                                                                                                                                                              |
| Structure:  | <chem>CC(C)C1NC(=O)C(NC(=O)c2cc(N)c(C)c3OC4=C(C)C(=O)C(N)=C(C(=O)NC5C(C)OC(=O)C(C)(C)N(C)C(=O)CN(C)C(=O)C6CCCN6C(=O)C(NC5=O)C(C)C)C4=Nc23)C(C)OC(=O)C(C)(C)N(C)C(=O)CN(C)C(=O)C2CCCN2C1=O</chem> |
| Name:       | Y3601; YOYO®-1 iodide (491/509)                                                                                                                                                                  |
| Method:     | Fluorescence Microscopy                                                                                                                                                                          |
| References: | 608                                                                                                                                                                                              |
| Structure:  | <chem>C[n+](c1c(oc2ccccc12)\C=C1\C=CN(CCC[N+](C)(C)CCC[N+](C)(C)CCCN2C=C/C(=C\Cc3oc4ccccc4[n+](3C)c3ccccc23)c2ccccc12</chem>                                                                     |
| Name:       | E3599; Ethidium homodimer-2; EthD-2                                                                                                                                                              |
| Method:     | Fluorescence Microscopy                                                                                                                                                                          |
| References: | 680                                                                                                                                                                                              |
| Structure:  | <chem>C[N+](C)(CCC[n+](c1c(-c2ccccc2)c2cc(N)ccc2c2ccc(N)cc12)CCC[N+](C)(C)CCC[n+](c1c(-c2ccccc2)c2cc(N)ccc2c2ccc(N)cc12</chem>                                                                   |
| Name:       | T3600; TOTO®-1 iodide (514/533)                                                                                                                                                                  |
| Method:     | Fluorescence Microscopy                                                                                                                                                                          |
| References: | 681                                                                                                                                                                                              |
| Structure:  | <chem>C[n+](c1c(sc2ccccc12)\C=C1\C=CN(CCC[N+](C)(C)CCC[N+](C)(C)CCCN2C=C/C(=C\Cc3sc4ccccc4[n+](3C)c3ccccc23)c2ccccc12</chem>                                                                     |
| Name:       | Y3606; YOYO®-3 iodide (612/631)                                                                                                                                                                  |
| Method:     | Uptake/Binding                                                                                                                                                                                   |
| References: | 622                                                                                                                                                                                              |
| Structure:  | <chem>C[n+](c1c(\C=C/C=C2/C=CN(CCC[N+](C)(C)C)CC[N+](C)(C)CCCN3C=C/C(=C/C=C\Cc4oc5ccc5[n+](4C)c4ccccc34)c3ccccc23)oc2ccccc12</chem>                                                              |
| Name:       | T3604; TOTO®-3 iodide (642/660)                                                                                                                                                                  |
| Method:     | Fluorescence Microscopy                                                                                                                                                                          |
| References: | 71                                                                                                                                                                                               |
| Structure:  | <chem>C[n+](c1c(\C=C/C=C2/C=CN(CCC[N+](C)(C)C)CC[N+](C)(C)CCCN3C=C/C(=C\C=C/C/c4sc5ccc5[n+](4C)c4ccccc34)c3ccccc23)sc2ccccc12</chem>                                                             |
| Name:       | Adriamycin; Doxorubicin                                                                                                                                                                          |

|             |                                                                                                                                                                                                                                                                            |
|-------------|----------------------------------------------------------------------------------------------------------------------------------------------------------------------------------------------------------------------------------------------------------------------------|
| Method:     | Fluorescence Microscopy/Cell Fractionation                                                                                                                                                                                                                                 |
| References: | 17, 729                                                                                                                                                                                                                                                                    |
| Structure:  | <chem>COc1cccc2C(=O)c3c(O)c4CC(O)(CC(OC5CC([NH3+])C(O)C(C)O5)c4c(O)c3C(=O)c12)C(=O)CO</chem>                                                                                                                                                                               |
| Name:       | Acriflavine                                                                                                                                                                                                                                                                |
| Method:     | Fluorescence Microscopy                                                                                                                                                                                                                                                    |
| References: | 127                                                                                                                                                                                                                                                                        |
| Structure:  | <chem>C[n+]<sub>1</sub>c2cc(N)ccc2cc2ccc(N)cc12</chem>                                                                                                                                                                                                                     |
| Name:       | Hydroethidine                                                                                                                                                                                                                                                              |
| Method:     | Fluorescence Microscopy                                                                                                                                                                                                                                                    |
| References: | 57                                                                                                                                                                                                                                                                         |
| Structure:  | <chem>CCC1C(c2ccccc2)c2cc(N)ccc2-c2cncc(N)c12</chem>                                                                                                                                                                                                                       |
| Name:       | Tetracycline                                                                                                                                                                                                                                                               |
| Method:     | histo                                                                                                                                                                                                                                                                      |
| References: | 58                                                                                                                                                                                                                                                                         |
| Structure:  | <chem>C[NH+](C)C1C2CC3C(C(=O)C2(O)C(=O)\C(C1=O)=C(N)[O-])=C([O-])c1c(O)cccc1C3(C)O</chem>                                                                                                                                                                                  |
| Name:       | Chromomycin A3                                                                                                                                                                                                                                                             |
| Method:     | Fluorescence Microscopy                                                                                                                                                                                                                                                    |
| References: | 69                                                                                                                                                                                                                                                                         |
| Structure:  | <chem>COC1C(O)CC(OC1C)OC1CC(OC(C)C1OC(C)=O)Oc1cc2cc3CC(C(OC)C(=O)C(O)C(C)O)C(OC4CC(OC5CC(OC6CC(C)(O)C(OC(C)=O)C(C)O6)C(O)C(C)O5)C(O)C(C)O4)C(=O)c3c(O)c2c(O)c1C</chem>                                                                                                     |
| Name:       | SYBR Green I                                                                                                                                                                                                                                                               |
| Method:     | Fluorescence Microscopy                                                                                                                                                                                                                                                    |
| References: | 71                                                                                                                                                                                                                                                                         |
| Structure:  | <chem>CCCN(CCC[NH+](C)C)C1=C/C(=C/c2sc3cccc3[n+]<sub>2</sub>C)c2cccc2N1c1cccc1</chem>                                                                                                                                                                                      |
| Name:       | Cyan 40; 4-((1-methylbenzothiazolylidene-2)methyl)-1,2,6-trimethylpyridinium perchlorate                                                                                                                                                                                   |
| Method:     | Fluorescence Microscopy                                                                                                                                                                                                                                                    |
| References: | 81                                                                                                                                                                                                                                                                         |
| Structure:  | <chem>CN1C(C)=CC(C=C1C)=Cc1sc2cccc2[n+]<sub>1</sub>C</chem>                                                                                                                                                                                                                |
| Name:       | AN-152; Lys(6)-LHRH-doxorubicin                                                                                                                                                                                                                                            |
| Method:     | Fluorescence Microscopy                                                                                                                                                                                                                                                    |
| References: | 104                                                                                                                                                                                                                                                                        |
| Structure:  | <chem>COc1cccc2C(=O)c3c(O)c4CC(O)(CC(OC5CC(NC(=O)CCCC(=O)NCCCC(NC(=O)C(Cc6cc(O)cc6)NC(=O)C(CO)NC(=O)C(Cc6c[nH]c7cccc67)NC(=O)C(Cc6ncc[nH]6)NC(=O)C6CC(C(=O)N6)C(=O)NC(CC(C)C)C(=O)NC(CCCN(C(N)=[NH2+])C(=O)N6CCCC6C(=O)NCC(N)=O)C(O)C(C)O5)c4c(O)c3C(=O)c12)C(=O)CO</chem> |
| Name:       | E36                                                                                                                                                                                                                                                                        |
| Method:     | Fluorescence Microscopy                                                                                                                                                                                                                                                    |
| References: | 115                                                                                                                                                                                                                                                                        |
| Structure:  | <chem>C[n+]<sub>1</sub>c(\C=C\c2c[nH]c3cccc23)ccc2cccc12</chem>                                                                                                                                                                                                            |

|             |                                                                                                                                                                                                                                         |
|-------------|-----------------------------------------------------------------------------------------------------------------------------------------------------------------------------------------------------------------------------------------|
| Name:       | E144                                                                                                                                                                                                                                    |
| Method:     | Fluorescence Microscopy                                                                                                                                                                                                                 |
| References: | 115                                                                                                                                                                                                                                     |
| Structure:  | <chem>COc1cc(OC)c(\C=C\c2ccc3ccccc3[n+]<sub>2</sub>C)c(O)C)c1</chem>                                                                                                                                                                    |
| Name:       | F22                                                                                                                                                                                                                                     |
| Method:     | Fluorescence Microscopy                                                                                                                                                                                                                 |
| References: | 115                                                                                                                                                                                                                                     |
| Structure:  | <chem>COc1ccc2[n+](C)c(\C=C\c3ccc(cc3)N(C)C)ccc2c1</chem>                                                                                                                                                                               |
| Name:       | 2'-O-Methyl                                                                                                                                                                                                                             |
| Method:     | Fluorescence Microscopy                                                                                                                                                                                                                 |
| References: | 128                                                                                                                                                                                                                                     |
| Structure:  | <chem>BC1OC(COC)C(OP([O-])(=O)OCC2OC(B)C(OC)C2OP(C)([O-])=O)C1OC</chem>                                                                                                                                                                 |
| Name:       | PBD Derivative 11; 7-Diethylaminocoumarin pyrrolobenzodiazepine derivative 11                                                                                                                                                           |
| Method:     | Fluorescence Microscopy                                                                                                                                                                                                                 |
| References: | 136                                                                                                                                                                                                                                     |
| Structure:  | <chem>CCN(CC)c1ccc2C=C(C(=O)NCCCOc3cc4N=CC5CCCN5C(=O)c4cc3OC)C(=O)Oc2c1</chem>                                                                                                                                                          |
| Name:       | DRAQ5                                                                                                                                                                                                                                   |
| Method:     | Fluorescence Microscopy                                                                                                                                                                                                                 |
| References: | 147                                                                                                                                                                                                                                     |
| Structure:  | <chem>C[NH+](C)CCNc1ccc(O)c2C(=O)c3c(NCC[NH+](C)C)ccc(O)c3C(=O)c12</chem>                                                                                                                                                               |
| Name:       | Morin; 3,5,7,2',4'-pentahydroxyflavanol                                                                                                                                                                                                 |
| Method:     | Fluorescence Microscopy                                                                                                                                                                                                                 |
| References: | 148                                                                                                                                                                                                                                     |
| Structure:  | <chem>Oc1cc(O)cc(c1)C1=C([O-])C(=O)c2c(O)cc(O)cc2O1</chem>                                                                                                                                                                              |
| Name:       | Mithramycin                                                                                                                                                                                                                             |
| Method:     | Fluorescence Microscopy                                                                                                                                                                                                                 |
| References: | 149                                                                                                                                                                                                                                     |
| Structure:  | <chem>COC(C1Cc2cc3cc(OC4CC(OC5CC(O)C(O)C(C)O5)C(O)C(C)O4)c(C)c(O)c3c(O)c2C(=O)C1OC1CC(OC2CC(OC3CC(C)(O)C(O)C(C)O3)C(O)C(C)O2)C(O)C(C)O1)C(=O)C(O)C(C)O</chem>                                                                           |
| Name:       | Polyamide 1                                                                                                                                                                                                                             |
| Method:     | Fluorescence Microscopy                                                                                                                                                                                                                 |
| References: | 159                                                                                                                                                                                                                                     |
| Structure:  | <chem>C[NH+](CCCNC(=O)CCNC(=O)c1cc(NC(=O)c2cc(NC(=O)c3cc(NC(=O)c4cc(NC(=O)CCCN(C(=O)c5cc(NC(=O)c6cc(NC(=O)c7nc(NC(=O)c8nccn8C)cn7C)cn6C)cn5C)cn4C)cn3C)cn2C)c[nH]1)CCCNC(=S)Nc1ccc(c(c1)C([O-])=O)C1=C2C=CC(=O)C=C2Oc2cc(O)ccc12</chem> |
| Name:       | Polyamide 3                                                                                                                                                                                                                             |
| Method:     | Fluorescence Microscopy                                                                                                                                                                                                                 |
| References: | 159                                                                                                                                                                                                                                     |



|             |                                                                                                                                                                                                                                            |
|-------------|--------------------------------------------------------------------------------------------------------------------------------------------------------------------------------------------------------------------------------------------|
| Structure:  | <chem>C[NH+](CCCNC(=S)Nc1ccc(c(c1)C([O-])=O)C1=C2C=CC(=O)C=C2Oc2cc(O)ccc12)C CCNC(=O)c1cc(NC(=O)c2cc(NC(=O)c3cc(NC(=O)c4nc(NC(=O)CCCNC(=O)c5cc(NC(=O)c6cc(NC(=O)c7nc(NC(=O)c8nccn8C)cn7C)cn6C)cn5C)cn4C)cn3C)cn2C)cn1C</chem>              |
| Name:       | Polyamide 5                                                                                                                                                                                                                                |
| Method:     | Fluorescence Microscopy                                                                                                                                                                                                                    |
| References: | 159                                                                                                                                                                                                                                        |
| Structure:  | <chem>C[NH+](CCCNC(=S)Nc1ccc(c(c1)C([O-])=O)C1=C2C=CC(=O)C=C2Oc2cc(O)ccc12)C CCNC(=O)c1cc(NC(=O)c2cc(NC(=O)c3cc(NC(=O)c4cc(NC(=O)CCCNC(=O)c5cc(NC(=O)c6cc(NC(=O)c7nc(NC(=O)c8nccn8C)cn7C)cn6C)cn5C)cn4C)cn3C)cn2C)cn1C</chem>              |
| Name:       | Polyamide 6                                                                                                                                                                                                                                |
| Method:     | Fluorescence Microscopy                                                                                                                                                                                                                    |
| References: | 159                                                                                                                                                                                                                                        |
| Structure:  | <chem>C[NH+](CCCNC(=S)Nc1ccc(c(c1)C([O-])=O)C1=C2C=CC(=O)C=C2Oc2cc(O)ccc12)C CCNC(=O)c1cc(NC(=O)c2cc(NC(=O)c3cc(NC(=O)c4cc(NC(=O)CCCNC(=O)c5nc(NC(=O)c6cc(NC(=O)c7cc(NC(=O)c8nccn8C)cn7C)cn6C)cn5C)cn4C)cn3C)cn2C)cn1C</chem>              |
| Name:       | Polyamide 11                                                                                                                                                                                                                               |
| Method:     | Fluorescence Microscopy                                                                                                                                                                                                                    |
| References: | 159                                                                                                                                                                                                                                        |
| Structure:  | <chem>C[NH+](CCCNC(=S)Nc1ccc(c(c1)C([O-])=O)C1=C2C=CC(=O)C=C2Oc2cc(O)ccc12)C CCNC(=O)c1cc(NC(=O)c2cc(NC(=O)c3cc(NC(=O)c4nc(NC(=O)C([NH3+])CCNC(=O)c5cc(NC(=O)c6cc(NC(=O)c7nc(NC(=O)c8nccn8C)cn7C)cn6C)cn5C)cn4C)cn3C)cn2C)cn1C</chem>      |
| Name:       | Polyamide 12                                                                                                                                                                                                                               |
| Method:     | Fluorescence Microscopy                                                                                                                                                                                                                    |
| References: | 159                                                                                                                                                                                                                                        |
| Structure:  | <chem>C[NH+](CCCNC(=S)Nc1ccc(c(c1)C([O-])=O)C1=C2C=CC(=O)C=C2Oc2cc(O)ccc12)C CCNC(=O)c1cc(NC(=O)c2cc(NC(=O)c3cc(NC(=O)c4nc(NC(=O)[C@H](CCNC(=O)c5cc(NC(=O)c6cc(NC(=O)c7nc(NC(=O)c8nccn8C)cn7C)cn6C)cn5C)NC(C)=O)cn4C)cn3C)cn2C)cn1C</chem> |
| Name:       | Polyamide 13                                                                                                                                                                                                                               |
| Method:     | Fluorescence Microscopy                                                                                                                                                                                                                    |
| References: | 159                                                                                                                                                                                                                                        |
| Structure:  | <chem>C[NH+](CCCNC(=S)Nc1ccc(c(c1)C([O-])=O)C1=C2C=CC(=O)C=C2Oc2cc(O)ccc12)C CCNC(=O)c1cc(NC(=O)c2cc(NC(=O)c3nc(NC(=O)c4cc(NC(=O)[C@H](CCNC(=O)c5cc(NC(=O)c6cc(NC(=O)c7cc(NC(=O)c8nccn8C)cn7C)cn6C)cn5C)NC(C)=O)cn4C)cn3C)cn2C)cn1C</chem> |
| Name:       | Polyamide 14                                                                                                                                                                                                                               |
| Method:     | Fluorescence Microscopy                                                                                                                                                                                                                    |
| References: | 159                                                                                                                                                                                                                                        |
| Structure:  | <chem>C[NH+](CCCNC(=S)Nc1ccc(c(c1)C([O-</chem>                                                                                                                                                                                             |

|             |                                                                                                                                                                                                                                  |
|-------------|----------------------------------------------------------------------------------------------------------------------------------------------------------------------------------------------------------------------------------|
| Structure:  | <chem>] =O)C1=C2C=CC(=O)C=C2Oc2cc(O)ccc12)C CCNC(=O)c1cc(NC(=O)c2cc(NC(=O)c3nc(NC(=O)c4cc(NC(=O)C(CCNC(=O)c5cc(NC(=O)c6cc(NC(=O)c7nc(NC(=O)c8nccn8C)cn7C)cn6C)cn5C)NC(C)=O)cn4C)cn3C)cn2C)cn1C</chem>                            |
| Name:       | Polyamide 22                                                                                                                                                                                                                     |
| Method:     | Fluorescence Microscopy                                                                                                                                                                                                          |
| References: | 159                                                                                                                                                                                                                              |
| Structure:  | <chem>C[NH+](CCCNC(=S)Nc1ccc(c(c1)C([O-])=O)C1=C2C=CC(=O)C=C2Oc2cc(O)ccc12)C CCNC(=O)c1cc(NC(=O)c2cc(NC(=O)c3cc(NC(=O)CCCNC(=O)c4cc(NC(=O)c5cc(NC(=O)c6nccn6C)cn5C)cn4C)cn3C)cn2C)cn1C</chem>                                    |
| Name:       | Olivomycin                                                                                                                                                                                                                       |
| Method:     | Fluorescence Microscopy                                                                                                                                                                                                          |
| References: | 164                                                                                                                                                                                                                              |
| Structure:  | <chem>COC1C(O)CC(OC1C)OC1CC(OC(C)C1OC(C)=O)Oc1cc(O)c2c(O)c3C(=O)C(OC4CC(OC5C C(OC6CC(C)(O)C(OC(=O)C(C)C)C(C)O6)C(O)C(C)O5)C(O)C(C)O4)C(Cc3cc2c1)C(OC)C(=O)C(O)C(C)O</chem>                                                       |
| Name:       | Flunitrazepam                                                                                                                                                                                                                    |
| Method:     | Fluorescence Microscopy                                                                                                                                                                                                          |
| References: | 172                                                                                                                                                                                                                              |
| Structure:  | <chem>CN1C(=O)CN=C(c2ccccc2F)c2cc(ccc12)N(=O)=O</chem>                                                                                                                                                                           |
| Name:       | BODIPY-labeled Polyamide 2                                                                                                                                                                                                       |
| Method:     | Fluorescence Microscopy                                                                                                                                                                                                          |
| References: | 176                                                                                                                                                                                                                              |
| Structure:  | <chem>C[NH+](CCCNC(=O)CCNC(=O)c1cc(NC(=O)c2cc(NC(=O)c3cc(NC(=O)c4cc(NC(=O)CCCNC(=O)c5cc(NC(=O)c6cc(NC(=O)c7nc(NC(=O)c8nccn8C)cn7C)cn6C)cn5C)cn4C)cn3C)cn2C)cn1C)CCCNC(=S)Nc1ccc(C2c3ccc(O)cc3O)c3c(O)ccc23)c(c1)C([O-])=O</chem> |
| Name:       | Uracil Mustard                                                                                                                                                                                                                   |
| Method:     | Cell Fractionation                                                                                                                                                                                                               |
| References: | 180                                                                                                                                                                                                                              |
| Structure:  | <chem>C1CCN(CCC1)C1=CNC(=O)NC1=O</chem>                                                                                                                                                                                          |
| Name:       | M-223; 10(2-diethylaminoethyl)-9-acridone                                                                                                                                                                                        |
| Method:     | Fluorescence Microscopy                                                                                                                                                                                                          |
| References: | 173                                                                                                                                                                                                                              |
| Structure:  | <chem>CC[NH+](CC)CCN1c2ccccc2C(=O)c2ccccc12</chem>                                                                                                                                                                               |
| Name:       | RB2Z; Dibenzo[h,j]dipyrido[3,2-a <sup>2'</sup> ,3'-c]phenazine)bis(2,2'-bipyridine)ruthenium(II) dication                                                                                                                        |
| Method:     | Fluorescence Microscopy                                                                                                                                                                                                          |
| References: | 82                                                                                                                                                                                                                               |
| Structure:  | <chem>c1ccc(nc1)-c1ccccn1</chem>                                                                                                                                                                                                 |
| Name:       | PicoGreen; [2-[N-bis-(3-dimethylaminopropyl)-amino]-4-[2,3-dihydro-3-methyl-(benzo-1,3-thiazol-2-yl)-methylidene]-1-phenyl-                                                                                                      |

|                                                                                                                           |
|---------------------------------------------------------------------------------------------------------------------------|
| quinolinium]+                                                                                                             |
| Method: Fluorescence Microscopy                                                                                           |
| References: 542                                                                                                           |
| Structure: <chem>C[NH+](C)CCCN(CCC[NH+](C)C)C1=C/C=C/C2sc3cccc3[n+]2C)c2cccc2N1c1cccc1</chem>                             |
| Name: Mitoxantrone                                                                                                        |
| Method: Fluorescence Microscopy                                                                                           |
| References: 235                                                                                                           |
| Structure: <chem>OCC[NH2+][CCNc1ccc(NCC[NH2+][CCO])c2C(=O)c3c(O)ccc(O)c3C(=O)c12</chem>                                   |
| Name: Pirarubicin                                                                                                         |
| Method: Fluorescence Microscopy                                                                                           |
| References: 236                                                                                                           |
| Structure: <chem>COc1cccc2C(=O)c3c(O)c4CC(O)(CC(OC5CC([NH3+])C(OC6CCCCO6)C(C)O5)c4c(O)c3C(=O)c12)C(=O)CO</chem>           |
| Name: Cascade Blue Derivative 2                                                                                           |
| Method: Fluorescence Microscopy                                                                                           |
| References: 272                                                                                                           |
| Structure: <chem>[O-]C(=O)COc1cc(c2CC=C3C(C=C(c4ccc1c2c34))S([O-])=O)S([O-])=O)S([O-])=O</chem>                           |
| Name: Cascade Blue Derivative 3                                                                                           |
| Method: Fluorescence Microscopy                                                                                           |
| References: 272                                                                                                           |
| Structure: <chem>[NH3+]CCNC(=O)COc1cc(c2CC=C3C(C=C(c4ccc1c2c34))S([O-])=O)S([O-])=O)S([O-])=O</chem>                      |
| Name: Cascade Blue Derivative 4                                                                                           |
| Method: Fluorescence Microscopy                                                                                           |
| References: 272                                                                                                           |
| Structure: <chem>[NH3+]CCCCCNC(=O)COc1cc(c2CC=C3C(C=C(c4ccc1c2c34))S([O-])=O)S([O-])=O)S([O-])=O</chem>                   |
| Name: Cascade Blue Derivative 10                                                                                          |
| Method: Fluorescence Microscopy                                                                                           |
| References: 272                                                                                                           |
| Structure: <chem>OCCNC(=O)COc1cc(c2CC=C3C(C=C(c4ccc1c2c34))S([O-])=O)S([O-])=O)S([O-])=O</chem>                           |
| Name: Cascade Blue Derivative 11                                                                                          |
| Method: Fluorescence Microscopy                                                                                           |
| References: 272                                                                                                           |
| Structure: <chem>NNC(=O)COc1cc(c2CC=C3C(C=C(c4ccc1c2c34))S([O-])=O)S([O-])=O)S([O-])=O</chem>                             |
| Name: Cascade Blue Derivative 14                                                                                          |
| Method: Fluorescence Microscopy                                                                                           |
| References: 272                                                                                                           |
| Structure: <chem>CC(C)(C)OC(=O)N1CCCC1C(=O)NCCNC(=O)COc1cc(c2CC=C3C(C=C(c4ccc1c2c34))S([O-])=O)S([O-])=O)S([O-])=O</chem> |
| Name: Cascade Blue Derivative 15                                                                                          |
| Method: Fluorescence Microscopy                                                                                           |

|                                                                                                                              |
|------------------------------------------------------------------------------------------------------------------------------|
| References: 272                                                                                                              |
| Structure: <chem>CC(C)(C)OC(=O)N1CCCC1C(=O)NCCCCNC(=O)COc1cc(c2CC=C3C(C=C(c4ccc1c2c34))S([O-])=O)S([O-])=O)S([O-])=O</chem>  |
| Name: Cascade Blue Derivative 16                                                                                             |
| Method: Fluorescence Microscopy                                                                                              |
| References: 272                                                                                                              |
| Structure: <chem>[O-]S(=O)C1C=C(c2ccc3c(OCC(=O)NCCCCCCC#N)cc(c4CC=C1c2c34))S([O-])=O)S([O-])=O</chem>                        |
| Name: Cascade Blue Derivative 19                                                                                             |
| Method: Fluorescence Microscopy                                                                                              |
| References: 272                                                                                                              |
| Structure: <chem>[O-]S(=O)C1C=C(c2ccc3c(OCC(=O)NCCCCCN(C=O)C=C)cc(c4CC=C1c2c34))S([O-])=O)S([O-])=O</chem>                   |
| Name: Cascade Blue Derivative 20                                                                                             |
| Method: Fluorescence Microscopy                                                                                              |
| References: 272                                                                                                              |
| Structure: <chem>[O-]S(=O)C1C=C(c2ccc3c(OCC(=O)NCCCCCN(C=O)c4ccc(cc4)N=[N+]=[N-])cc(c4CC=C1c2c34))S([O-])=O)S([O-])=O</chem> |
| Name: BUdR; Broxuridine; 5-Bromo-2'-deoxyuridine                                                                             |
| Method: Distr.others                                                                                                         |
| References: 260                                                                                                              |
| Structure: <chem>OCC1OC(CC1O)N1C=C(Br)C(=O)NC1=O</chem>                                                                      |
| Name: F3TdR; Trifluridine; 5-trifluorothymidine                                                                              |
| Method: Distr.others                                                                                                         |
| References: 260                                                                                                              |
| Structure: <chem>OCC1OC(CC1O)N1C=C(C(=O)NC1=O)C(F)(F)F</chem>                                                                |
| Name: Daunorubicin Analogue 1                                                                                                |
| Method: Fluorescence Microscopy                                                                                              |
| References: 261                                                                                                              |
| Structure: <chem>COc1cccc2C(=O)c3c(O)c4CC(O)(CC(OC5CC([NH2+][CC(C)=O)C(O)C(C)O5)c4c(O)c3C(=O)c12)C(C)=O</chem>               |
| Name: Lycopene                                                                                                               |
| Method: Cell Fractionation                                                                                                   |
| References: 278                                                                                                              |
| Structure: <chem>CC(C)=CCC\C(C)=C\C=C\C(C)=C\C=C\C(C)=C\C=C\C(C)=C\C=C\C(C)=C\C=C\C(C)=C\C=C\C(C)C</chem>                    |
| Name: BBR 3422                                                                                                               |
| Method: Cell Fractionation                                                                                                   |
| References: 312                                                                                                              |
| Structure: <chem>C[NH2+][CCNc1ccc2n(CC[NH3+])nc3-c4cnccc4C(=O)c1c23</chem>                                                   |
| Name: Cisplatin                                                                                                              |

|             |                                                                                                  |
|-------------|--------------------------------------------------------------------------------------------------|
| Method:     | Cell Fractionation                                                                               |
| References: | 316                                                                                              |
| Structure:  | <chem>Cl[Pt++][Cl]</chem>                                                                        |
| Name:       | DB75; Furamidine                                                                                 |
| Method:     | Fluorescence Microscopy                                                                          |
| References: | 327                                                                                              |
| Structure:  | <chem>N[C+](N)c1ccc(cc1)-c1ccc(o1)-c1ccc(cc1)[C+](N)N</chem>                                     |
| Name:       | DB181                                                                                            |
| Method:     | Fluorescence Microscopy                                                                          |
| References: | 327                                                                                              |
| Structure:  | <chem>CC(C)N[C+](N)c1ccc(cc1)-c1ccc(o1)-c1ccc(cc1)[C+](N)NC(C)C</chem>                           |
| Name:       | DB226                                                                                            |
| Method:     | Fluorescence Microscopy                                                                          |
| References: | 327                                                                                              |
| Structure:  | <chem>CCC(CC)N[C+](N)c1ccc(cc1)-c1ccc(o1)-c1ccc(cc1)[C+](N)NC(CC)CC</chem>                       |
| Name:       | DB244                                                                                            |
| Method:     | Fluorescence Microscopy                                                                          |
| References: | 327                                                                                              |
| Structure:  | <chem>N[C+](NC1CCCC1)c1ccc(cc1)-c1ccc(o1)-c1ccc(cc1)[C+](N)NC1CCCC1</chem>                       |
| Name:       | DB249                                                                                            |
| Method:     | Fluorescence Microscopy                                                                          |
| References: | 327                                                                                              |
| Structure:  | <chem>N[C+](NC1CCCC1)c1ccc(cc1)-c1ccc(o1)-c1ccc(cc1)[C+](N)NC1CCCC1</chem>                       |
| Name:       | DB417                                                                                            |
| Method:     | Fluorescence Microscopy                                                                          |
| References: | 327                                                                                              |
| Structure:  | <chem>CN[C+](N)c1ccc(cc1)-c1ccc(o1)-c1ccc(cc1)[C+](N)NC</chem>                                   |
| Name:       | DB569                                                                                            |
| Method:     | Fluorescence Microscopy                                                                          |
| References: | 327                                                                                              |
| Structure:  | <chem>NC(=[NH+])c1ccccc1c1ccc(cc1)-c1ccc(o1)-c1ccc(cc1)C(N)=[NH+]c1ccccc1</chem>                 |
| Name:       | DB673                                                                                            |
| Method:     | Fluorescence Microscopy                                                                          |
| References: | 327                                                                                              |
| Structure:  | <chem>NC(N)=[NH+]c1ccc(cc1)-c1ccc(o1)-c1ccc(cc1)[NH+]=C(N)N</chem>                               |
| Name:       | NT2                                                                                              |
| Method:     | Fluorescence Microscopy                                                                          |
| References: | 332                                                                                              |
| Structure:  | <chem>CCCOC(=O)C1=Cc2c3nc(cc4[nH]c(cc5nc(cc6[nH]c2c(CC)c6CC)c(CC)c5CC)c(CC)c4CC)C(C)C13CC</chem> |
| Name:       | 4-dimethylaminoazobenzene                                                                        |

|             |                                                                                                                                                                                                |
|-------------|------------------------------------------------------------------------------------------------------------------------------------------------------------------------------------------------|
| Method:     | Cell Fractionation                                                                                                                                                                             |
| References: | 534                                                                                                                                                                                            |
| Structure:  | <chem>CN(C)c1ccc(cc1)\N=N\c1ccccc1</chem>                                                                                                                                                      |
| Name:       | Zinc Benzochlorin                                                                                                                                                                              |
| Method:     | Fluorescence Microscopy                                                                                                                                                                        |
| References: | 357                                                                                                                                                                                            |
| Structure:  | <chem>CCC1=C(CC)C2N3[Zn]N4C(=C\C5=N\C(=C/C13)\C(CC)=C5CC)/C(CC)=C(CC)\C4=C1/C=CC=C3C/1=N\C(=C2\C=[N+](\C)C)C3(CC)CC</chem>                                                                     |
| Name:       | Porphyrin-Ruthenium                                                                                                                                                                            |
| Method:     | Fluorescence Microscopy                                                                                                                                                                        |
| References: | 372                                                                                                                                                                                            |
| Structure:  | <chem>COc1cc(ccc1O)-c1c2ccc(n2)c(-c2cc[n+](cc2)[Ru-5]234(Cl)[n+]5ccccc5-c5cccc[n+]25)c2ccc([nH]2)c(-c2ccc(O)c(OC)c2)c2ccc(n2)c(-c2ccc(O)c(OC)c2)c2ccc1[nH]2.c1cc[n+]3c(c1)-c1cccc[n+]41</chem> |
| Name:       | ZnPcBr8                                                                                                                                                                                        |
| Method:     | Fluorescence Microscopy                                                                                                                                                                        |
| References: | 376                                                                                                                                                                                            |
| Structure:  | <chem>BrCc1cc2c3nc4[n+]5c(nc6n7c(nc8[n+]9c(nc(n3[Zn--]579)c2cc1CBr)c1cc(CBr)c(CBr)cc81)c1cc(CBr)c(CBr)cc61)c1cc(CBr)c(CBr)cc41</chem>                                                          |
| Name:       | β-Carboline Derivative A                                                                                                                                                                       |
| Method:     | Fluorescence Microscopy                                                                                                                                                                        |
| References: | 424                                                                                                                                                                                            |
| Structure:  | <chem>CCn1c2ccccc2c2cc(nc(C)c12)C(=O)NCC[NH3+]</chem>                                                                                                                                          |
| Name:       | β-Carboline Derivative B                                                                                                                                                                       |
| Method:     | Fluorescence Microscopy                                                                                                                                                                        |
| References: | 424                                                                                                                                                                                            |
| Structure:  | <chem>CCCCn1c2ccccc2c2cc(nc(C)c12)C(=O)NCC[NH3+]</chem>                                                                                                                                        |
| Name:       | β-Carboline Derivative C                                                                                                                                                                       |
| Method:     | Fluorescence Microscopy                                                                                                                                                                        |
| References: | 424                                                                                                                                                                                            |
| Structure:  | <chem>Cc1nc(cc2c3ccccc3n(Cc3ccccc3)c12)C(=O)NC[C][NH3+]</chem>                                                                                                                                 |
| Name:       | β-Carboline Derivative D                                                                                                                                                                       |
| Method:     | Fluorescence Microscopy                                                                                                                                                                        |
| References: | 424                                                                                                                                                                                            |
| Structure:  | <chem>CCn1c2ccccc2c2cc(nc(C)c12)C(=O)NCCCCCNC(=O)c1cc2c3ccccc3n(CC)c2c(C)n1</chem>                                                                                                             |
| Name:       | β-Carboline Derivative E                                                                                                                                                                       |
| Method:     | Fluorescence Microscopy                                                                                                                                                                        |
| References: | 424                                                                                                                                                                                            |
| Structure:  | <chem>Cc1nc(cc2c3ccccc3n(Cc3ccccc3)c12)C(=O)NCCNC(=O)c1cc2c3ccccc3n(Cc3ccccc3)c2c(C)n1</chem>                                                                                                  |
| Name:       | Sanguinarine                                                                                                                                                                                   |

|             |                                                                                              |
|-------------|----------------------------------------------------------------------------------------------|
| Method:     | Fluorescence Microscopy                                                                      |
| References: | 437                                                                                          |
| Structure:  | <chem>C[n+](C)1cc2c(OO)c(OO)ccc2c2ccc3cc(OCO)c(O CO)cc3c12</chem>                            |
| Name:       | Chelerythrine                                                                                |
| Method:     | Fluorescence Microscopy                                                                      |
| References: | 437                                                                                          |
| Structure:  | <chem>COc1ccc2c(c[n+](C)c3c4cc(OCO)c(OCO)cc4c cc23)c1OC</chem>                               |
| Name:       | Sanguirubine                                                                                 |
| Method:     | Fluorescence Microscopy                                                                      |
| References: | 437                                                                                          |
| Structure:  | <chem>COc1cc2ccc3c4c(OC)cc(OO)c(OO)c4c[n+](C) c3c2cc1OC</chem>                               |
| Name:       | Chelirubine                                                                                  |
| Method:     | Fluorescence Microscopy                                                                      |
| References: | 437                                                                                          |
| Structure:  | <chem>COc1cc(OO)c(OO)c2c[n+](C)c3c4cc(OCO)c(O CO)cc4ccc3c12</chem>                           |
| Name:       | Macarpine                                                                                    |
| Method:     | Fluorescence Microscopy                                                                      |
| References: | 437                                                                                          |
| Structure:  | <chem>COc1cc2c3c(OC)cc(OO)c(OO)c3c[n+](C)c2c2 cc(OCO)c(OCO)cc12</chem>                       |
| Name:       | DB293                                                                                        |
| Method:     | Fluorescence Microscopy                                                                      |
| References: | 472                                                                                          |
| Structure:  | <chem>NC(=[NH2+])c1ccc(cc1)-c1ccc(o1)- c1nc2ccc(cc2[nH]1)C(N)=[NH2+]</chem>                  |
| Name:       | DB60                                                                                         |
| Method:     | Fluorescence Microscopy                                                                      |
| References: | 472                                                                                          |
| Structure:  | <chem>C1C[NH+]=C(N1)c1ccc(cc1)-c1ccc(o1)- c1ccc(cc1)C1=[NH+]CCN1</chem>                      |
| Name:       | DB302                                                                                        |
| Method:     | Fluorescence Microscopy                                                                      |
| References: | 472                                                                                          |
| Structure:  | <chem>C1C[NH+]=C(N1)c1ccc(cc1)-c1ccc(o1)- c1nc2ccc(cc2[nH]1)C1=[NH+]CCN1</chem>              |
| Name:       | DB501                                                                                        |
| Method:     | Fluorescence Microscopy                                                                      |
| References: | 472                                                                                          |
| Structure:  | <chem>Nc1ccc(cc1)-c1ccc(o1)- c1nc2ccc(cc2[nH]1)C(N)=[NH2+]</chem>                            |
| Name:       | DB182                                                                                        |
| Method:     | Fluorescence Microscopy                                                                      |
| References: | 472                                                                                          |
| Structure:  | <chem>C[NH+](C)CCCNC(=[NH2+])c1ccc(cc1)- c1ccc(o1)- c1ccc(cc1)C(=[NH2+])NCCC[NH+](C)C</chem> |

|             |                                                                                                                     |
|-------------|---------------------------------------------------------------------------------------------------------------------|
| Name:       | DB340                                                                                                               |
| Method:     | Fluorescence Microscopy                                                                                             |
| References: | 472                                                                                                                 |
| Structure:  | <chem>C[NH+](C)CCCNC(=[NH2+])c1ccc(cc1)- c1ccc(o1)- c1nc2ccc(cc2[nH]1)C(=[NH2+])NCCC[NH+]( C)C</chem>               |
| Name:       | Hoechst 33377 (H1)                                                                                                  |
| Method:     | Fluorescence Microscopy                                                                                             |
| References: | 475                                                                                                                 |
| Structure:  | <chem>CN1CC[NH+](CC1)C1CCC2[NH+]=C(NC2C1 )c1ccc2NC(Nc2c1)c1ccc(Oc2ccccc2)cc1</chem>                                 |
| Name:       | Hoechst 33342 (H20)                                                                                                 |
| Method:     | Fluorescence Microscopy                                                                                             |
| References: | 475                                                                                                                 |
| Structure:  | <chem>CCOc1ccc(cc1)C1Nc2ccc(cc2N1)C1=[NH+ ]C 2CCC(CC2N1)[NH+]1CCN(C)CC1</chem>                                      |
| Name:       | pEB                                                                                                                 |
| Method:     | Cell Fractionation                                                                                                  |
| References: | 477                                                                                                                 |
| Structure:  | <chem>CCCC1C(O)C(C)CCCC2(C)OC2CC(OC(=O)C C(O)C(C)(C)C1=O)C(\C)=C\c1csc(C)n1</chem>                                  |
| Name:       | pED                                                                                                                 |
| Method:     | Cell Fractionation                                                                                                  |
| References: | 477                                                                                                                 |
| Structure:  | <chem>CCCC1C(O)C(C)CCC\C(C)=C/CC(OC(=O)CC (O)C(C)(C)C1=O)C(\C)=C\c1csc(C)n1</chem>                                  |
| Name:       | BNIPSpd                                                                                                             |
| Method:     | Fluorescence Microscopy                                                                                             |
| References: | 479                                                                                                                 |
| Structure:  | <chem>O=C1N(CCC[NH2+])CCCC[NH2+][CC[NH2+ ]CCCN2C(=O)c3cccc4cccc(C2=O)c34)C(=O)c 2cccc3cccc1c23</chem>               |
| Name:       | BNIPSpm                                                                                                             |
| Method:     | Fluorescence Microscopy                                                                                             |
| References: | 479                                                                                                                 |
| Structure:  | <chem>O=C1N(CCC[NH2+])CCC[NH2+][CCCC[NH2+ ]CCC[NH2+][CCCN2C(=O)c3cccc4cccc(C2=O )c34)C(=O)c2cccc3cccc1c23</chem>    |
| Name:       | BNIPSPm                                                                                                             |
| Method:     | Fluorescence Microscopy                                                                                             |
| References: | 479                                                                                                                 |
| Structure:  | <chem>O=C1N(OCCC[NH2+])CCC[NH2+][CCCC[NH 2+][CCC[NH2+][CCCON2C(=O)c3cccc4cccc(C 2=O)c34)C(=O)c2cccc3cccc1c23</chem> |
| Name:       | Pyrolobenzodiazepine- Poly(N-methylpyrrole) Conjugate 50a                                                           |
| Method:     | Fluorescence Microscopy                                                                                             |
| References: | 481                                                                                                                 |
| Structure:  | <chem>COC(=O)c1cc(NC(=O)CCCOc2cc3N=CC4CC CN4C(=O)c3cc2OC)cn1C</chem>                                                |

|             |                                                                                                                                                                                                                                         |
|-------------|-----------------------------------------------------------------------------------------------------------------------------------------------------------------------------------------------------------------------------------------|
| Name:       | Pyrrlobenzodiazepine- Poly(N-methylpyrrole) Conjugate 50b                                                                                                                                                                               |
| Method:     | Fluorescence Microscopy                                                                                                                                                                                                                 |
| References: | 481                                                                                                                                                                                                                                     |
| Structure:  | <chem>COC(=O)c1cc(NC(=O)c2cc(NC(=O)CCCOc3cc4N=CC5CCCN5C(=O)c4cc3OC)cn2C)cn1C</chem>                                                                                                                                                     |
| Name:       | Pyrrlobenzodiazepine- Poly(N-methylpyrrole) Conjugate 50c                                                                                                                                                                               |
| Method:     | Fluorescence Microscopy                                                                                                                                                                                                                 |
| References: | 481                                                                                                                                                                                                                                     |
| Structure:  | <chem>COC(=O)c1cc(NC(=O)c2cc(NC(=O)c3cc(NC(=O)CCCOc4cc5N=CC6CCCN6C(=O)c5cc4OC)cn3C)cn2C)cn1C</chem>                                                                                                                                     |
| Name:       | Polyamide-FITC Conjugate 1                                                                                                                                                                                                              |
| Method:     | Fluorescence Microscopy                                                                                                                                                                                                                 |
| References: | 486                                                                                                                                                                                                                                     |
| Structure:  | <chem>C[NH+](CCCNC(=S)Nc1ccc(c(c1)C([O-])=O)C1=C2C=CC(=O)C=C2Oc2cc(O)ccc12)C CCNC(=O)c1cc(NC(=O)c2cc(NC(=O)c3nc(NC(=O)c4cc(NC(=O)C([NH3+])CCNC(=O)c5nc(NC(=O)c6cc(NC(=O)c7cc(NC(=O)c8sccc8Cl)c n7C)cn6C)cn5C)cn4C)cn3C)cn2C)cn1C</chem> |
| Name:       | Polyamide-FITC Conjugate 2                                                                                                                                                                                                              |
| Method:     | Fluorescence Microscopy                                                                                                                                                                                                                 |
| References: | 486                                                                                                                                                                                                                                     |
| Structure:  | <chem>C[NH+](CCCNC(=S)Nc1ccc(c(c1)C([O-])=O)C1=C2C=CC(=O)C=C2Oc2cc(O)ccc12)C</chem>                                                                                                                                                     |

|             |                                                                                                                                                                |
|-------------|----------------------------------------------------------------------------------------------------------------------------------------------------------------|
| Structure:  | <chem>CCNC(=O)c1cc(NC(=O)c2cc(NC(=O)c3cc(NC(=O)c4nc(NC(=O)C([NH3+])CCNC(=O)c5nc(NC(=O)c6cc(NC(=O)c7nc(NC(=O)c8nccn8C)cn7C)cn6C)cn5C)cn4C)cn3C)cn2C)cn1C</chem> |
| Name:       | TP-2py                                                                                                                                                         |
| Method:     | Fluorescence Microscopy                                                                                                                                        |
| References: | 503                                                                                                                                                            |
| Structure:  | <chem>C[n+]1ccc(\C=C\c2ccc(cc2)N(c2ccccc2)c2ccc(cc2)\C=C\c2cc[n+](C)cc2)cc1</chem>                                                                             |
| Name:       | TP-3py                                                                                                                                                         |
| Method:     | Fluorescence Microscopy                                                                                                                                        |
| References: | 503                                                                                                                                                            |
| Structure:  | <chem>C[n+]1ccc(cc1)\C=C\c1ccc(cc1)N(c1ccc(cc1)\C=C\c1cc[n+](C)cc1)c1ccc(cc1)\C=C\c1cc[n+](C)cc1</chem>                                                        |
| Name:       | Daunorubicin                                                                                                                                                   |
| Method:     | Fluorescence Microscopy                                                                                                                                        |
| References: | 261                                                                                                                                                            |
| Structure:  | <chem>COc1cccc2C(=O)c3c(O)c4CC(O)(CC(OC5CC([NH3+])C(O)C(C)O5)c4c(O)c3C(=O)c12)C(C)=O</chem>                                                                    |
| Name:       | Levofloxacin                                                                                                                                                   |
| Method:     | Cell Fractionation                                                                                                                                             |
| References: | 241                                                                                                                                                            |
| Structure:  | <chem>C[C@H]1COC2=C3N1C=C(C([O-])=O)C(=O)C3=CC(F)=C2N1CCN(C)CC1</chem>                                                                                         |

**Supplemental Table 4: The chemical compounds with reported subcellular localization site in the plasma membrane.** References information is available in Supplemental Table 10. Structure is presented as the *Simplified Molecular Input Line Entry Specification string of the major microspecies at pH 7.4, as calculated by ChemAxon.*

|             |                                                                                        |
|-------------|----------------------------------------------------------------------------------------|
| Name:       | D202; 1,6-diphenyl-1,3,5-hexatrieneDPH                                                 |
| Method:     | Fluorescence Microscopy                                                                |
| References: | 589, 700, 701                                                                          |
| Structure:  | <chem>c1ccc(cc1)\C=C\C=C\C=C\c1ccccc1</chem>                                           |
| Name:       | D3921; 4,4-difluoro-1,3,5,7-tetramethyl-4-bora-3a,4a-diaza-s-indacene; BODIPY® 505/515 |
| Method:     | Fluorescence Microscopy                                                                |
| References: | 590                                                                                    |
| Structure:  | <chem>CC1=CC(C)=[N+]2C1=Cc1c(C)cc(C)n1[B-]2(F)F</chem>                                 |
| Name:       | D3923; 4-(dicyanovinyl)julolidine; DCVJ                                                |
| Method:     | Fluorescence Microscopy                                                                |
| References: | 591                                                                                    |
| Structure:  | <chem>N#CC(=Cc1cc2CCCN3CCCC(c1)c23)C#N</chem>                                          |
| Name:       | P36005; Cis-parinaric acid                                                             |
| Method:     | Fluorescence Microscopy                                                                |
| References: | 592, 702                                                                               |
| Structure:  | <chem>CC\C=C\C=C\C=C\C=C/C/CCCCCCCC([O-])=O</chem>                                     |
| Name:       | A47; 1-anilino-naphthalene-8-sulfonic acid1,8-ANS                                      |
| Method:     | Uptake/Binding                                                                         |
| References: | 662                                                                                    |
| Structure:  | <chem>[O-]S(=O)(=O)c1cccc2cccc(Nc3ccccc3)c12</chem>                                    |
| Name:       | A50; 2-anilino-naphthalene-6-sulfonic acid; 2,6-ANS                                    |
| Method:     | Uptake/Binding                                                                         |
| References: | 662                                                                                    |

|             |                                                                                               |
|-------------|-----------------------------------------------------------------------------------------------|
| Structure:  | <chem>[O-]S(=O)(=O)c1ccc2cc(Nc3ccccc3)ccc2c1</chem>                                           |
| Name:       | D383; 4,4-difluoro-5,7-dimethyl-4-bora-3a,4a-diaza-s-indacene-3-pentanoic acid; BODIPY® FL C5 |
| Method:     | Fluorescence Microscopy                                                                       |
| References: | 668                                                                                           |
| Structure:  | <chem>Cc1cc(C)n2c1C=C1C=CC(CCCCC([O-])=O)=[N+]1[B-]2(F)F</chem>                               |
| Name:       | T53; 2-(p-toluidinyl)naphthalene-6- sulfonic acid, sodium salt; 2,6-TNS                       |
| Method:     | Fluorescence Microscopy                                                                       |
| References: | 623                                                                                           |
| Structure:  | <chem>Cc1ccc(Nc2ccc3cc(ccc3c2)S([O-])(=O)=O)cc1</chem>                                        |
| Name:       | D250; 6-dodecanoyl-2-dimethylaminonaphthalene; Laurdan                                        |
| Method:     | Fluorescence Microscopy                                                                       |
| References: | 595                                                                                           |
| Structure:  | <chem>CCCCCCCCCCCC(=O)c1ccc2cc(ccc2c1)N(C)C</chem>                                            |
| Name:       | P31; 1-pyrenedecanoic acid                                                                    |
| Method:     | NA                                                                                            |
| References: | Invi                                                                                          |
| Structure:  | <chem>[O-]C(=O)CCCCCCCCc1ccc2ccc3cccc4ccc1c2c34</chem>                                        |
| Name:       | N678; 12-(N-(7-nitrobenz-2-oxa-1,3- diazol-4-yl)amino)dodecanoic acid                         |

|             |                                                                                                            |
|-------------|------------------------------------------------------------------------------------------------------------|
| Method:     | NA                                                                                                         |
| References: | Invi                                                                                                       |
| Structure:  | [O-]C(=O)CCCCCCCCCCCCNc1ccc(c2nonc12)N(=O)=O                                                               |
| Name:       | P96;1-pyrenedodecanoic acid                                                                                |
| Method:     | Fluorescence Microscopy                                                                                    |
| References: | 653                                                                                                        |
| Structure:  | [O-]C(=O)CCCCCCCCCCCCc1ccc2ccc3cccc4ccc1c2c34                                                              |
| Name:       | H22730; 4-heptadecyl-7-hydroxycoumarin                                                                     |
| Method:     | Fluorescence Microscopy                                                                                    |
| References: | 626                                                                                                        |
| Structure:  | CCCCCCCCCCCCCCCCC1=CC(=O)Oc2cc(O)ccc12                                                                     |
| Name:       | B3824; 5-butyl-4,4-difluoro-4-bora-3a,4a-diaza-s-indacene-3-nonanoic acid; BODIPY® 500/510 C4, C9          |
| Method:     | Fluorescence Microscopy                                                                                    |
| References: | 627, 721                                                                                                   |
| Structure:  | CCCCc1ccc2C=C3C=CC(CCCCCCCCC([O-])=O)=[N+]3[B-](F)(F)n12                                                   |
| Name:       | D3823; 4,4-difluoro-5-methyl-4-bora-3a,4a-diaza-s-indacene-3-dodecanoic acid; BODIPY® 500/510 C1, C12      |
| Method:     | Fluorescence Microscopy                                                                                    |
| References: | 628                                                                                                        |
| Structure:  | Cc1ccc2C=C3C=CC(CCCCCCCCC([O-])=O)=[N+]3[B-](F)(F)n12                                                      |
| Name:       | D3825; 4,4-difluoro-5-octyl-4-bora-3a,4a-diaza-s-indacene-3-pentanoic acid; BODIPY® 500/510 C8, C5         |
| Method:     | Fluorescence Microscopy                                                                                    |
| References: | 627                                                                                                        |
| Structure:  | CCCCCCCCc1ccc2C=C3C=CC(CCCCC([O-])=O)=[N+]3[B-](F)(F)n12                                                   |
| Name:       | D3862; 4,4-difluoro-5,7-dimethyl-4-bora-3a,4a-diaza-s-indacene-3-undecanoic acid; BODIPY® FL C11           |
| Method:     | Cell Fractionation                                                                                         |
| References: | 605                                                                                                        |
| Structure:  | Cc1cc(C)n2c1C=C1C=CC(CCCCCCCCC([O-])=O)=[N+]1[B-]2(F)F                                                     |
| Name:       | B3932; (E,E)-3,5-bis-(4-phenyl-1,3-butadienyl)-4,4-difluoro-4-bora-3a,4a-diaza-s-indacene; BODIPY® 665/676 |
| Method:     | NA                                                                                                         |
| References: | Invi                                                                                                       |
| Structure:  | F[B-]1(F)n2c(\C=C\C=C\c3cccc3)ccc2C=C2C=CC(/C=C/C=C\c3cccc3)=[N+]12                                        |

|             |                                                                                                                      |
|-------------|----------------------------------------------------------------------------------------------------------------------|
| Name:       | D3835; 4,4-difluoro-5-(2-thienyl)-4-bora-3a,4a-diaza-s-indacene-3-dodecanoic acid; BODIPY® 558/568 C12               |
| Method:     | NA                                                                                                                   |
| References: | Invi                                                                                                                 |
| Structure:  | [O-]C(=O)CCCCCCCCCCCC1=[N+]2C(C=C1)=Cc1ccc(-c3cccc3)n1[B-]2(F)F                                                      |
| Name:       | D3821; 4,4-difluoro-5,7-dimethyl-4-bora-3a,4a-diaza-s-indacene-3-hexadecanoic acid; BODIPY® FL C16                   |
| Method:     | Fluorescence Microscopy                                                                                              |
| References: | 604                                                                                                                  |
| Structure:  | Cc1cc(C)n2c1C=C1C=CC(CCCCCCCCCCCCC([O-])=O)=[N+]1[B-]2(F)F                                                           |
| Name:       | N1148; NBD cholesterol; (22-(N-(7-nitrobenz-2-oxa-1,3-diazol-4-yl)amino)-23,24-bisnor-5-cholen-3beta-ol)             |
| Method:     | Fluorescence Microscopy                                                                                              |
| References: | 683                                                                                                                  |
| Structure:  | CC(CNc1ccc(c2nonc12)N(=O)=O)C1CCC2C3CC=C4CC(O)CCC4(C)C3CCC12C                                                        |
| Name:       | D3861; 4,4-difluoro-5-(4-phenyl-1,3-butadienyl)-4-bora-3a,4a-diaza-s-indacene-3-undecanoic acid; BODIPY® 581/591 C11 |
| Method:     | Fluorescence Microscopy                                                                                              |
| References: | 605                                                                                                                  |
| Structure:  | [O-]C(=O)CCCCCCCCCCCC1=[N+]2C(C=C1)=Cc1ccc(\C=C\C=C\c3cccc3)n1[B-]2(F)F                                              |
| Name:       | D109; 5-dodecanoylamino fluorescein                                                                                  |
| Method:     | NA                                                                                                                   |
| References: | Invi                                                                                                                 |
| Structure:  | CCCCCCCCCCCCC(=O)Nc1ccc(c(c1)C([O-])=O)C1=C2C=CC(=O)C=C2Oc2cc(O)ccc12                                                |
| Name:       | F3857; Fluorescein octadecyl ester                                                                                   |
| Method:     | Uptake/Binding                                                                                                       |
| References: | 623                                                                                                                  |
| Structure:  | CCCCCCCCCCCCCCCCCO(=O)c1cccc1C1=C2C=CC(=O)C=C2Oc2cc(O)ccc12                                                          |
| Name:       | H110; 5-hexadecanoylamino fluorescein                                                                                |
| Method:     | Fluorescence Microscopy                                                                                              |
| References: | 675                                                                                                                  |
| Structure:  | CCCCCCCCCCCCCCCCC(=O)Nc1ccc(c(c1)C([O-])=O)C1=C2C=CC(=O)C=C2Oc2cc(O)ccc12                                            |
| Name:       | D291; 4-(4-(didecylamino)styryl)-N-methylpyridinium iodide; 4-Di-10-ASP                                              |
| Method:     | Fluorescence Microscopy                                                                                              |
| References: | 676                                                                                                                  |
| Structure:  | CCCCCCCCCN(CCCCCCCCC)c1ccc(cc1)\C=C\c1cc[n+](C)cc1                                                                   |

|             |                                                                                                                                                               |
|-------------|---------------------------------------------------------------------------------------------------------------------------------------------------------------|
| Name:       | O246; Octadecyl rhodamine B chloride; R18                                                                                                                     |
| Method:     | Uptake/Binding                                                                                                                                                |
| References: | 678                                                                                                                                                           |
| Structure:  | <chem>CCCCCCCCCCCCCCCCCOC(=O)C1CCCC1C1=C2C=CC(C=C2O)C2CC(CCC12)N(CC)CC=[N+](CC)CC</chem>                                                                      |
| Name:       | D3805; 2-(4,4-difluoro-5,7-dimethyl-4-bora-3a,4a-diaza-s-indacene-3-pentanoyl)-1-hexadecanoyl-sn-glycero-3-phosphate, diammonium salt; Beta-BODIPY® FL C5-HPA |
| Method:     | NA                                                                                                                                                            |
| References: | Invi                                                                                                                                                          |
| Structure:  | <chem>CCCCCCCCCCCCCCCC(=O)OCC(COP([O-])([O-])=O)OC(=O)CCCC1=[N+]2C(C=C1)=Cc1c(C)cc(C)n1[B-]2(F)F</chem>                                                       |
| Name:       | D383; 1,1'-didodecyl-3,3',3'-tetramethylindocarbocyanine perchlorate; DiIC12(3)                                                                               |
| Method:     | Fluorescence Microscopy                                                                                                                                       |
| References: | 611                                                                                                                                                           |
| Structure:  | <chem>CCCCCCCCCCCCCN1c2cccc2C(C)(C)\C1=C\C=C\C1=[N+](CCCCCCCCCCCC)c2cccc2C1(C)C</chem>                                                                        |
| Name:       | N3786; 2-(6-(7-nitrobenz-2-oxa-1,3-diazol-4-yl)amino)hexanoyl-1-hexadecanoyl-sn-glycero-3-phosphocholine; NBD C6-HPC                                          |
| Method:     | Fluorescence Microscopy                                                                                                                                       |
| References: | 724                                                                                                                                                           |
| Structure:  | <chem>CCCCCCCCCCCCCCCC(=O)OCC(COP([O-])(=O)OCC[N+](C)(C)C)OC(=O)CCCCNc1ccc(c2nonc12)N(=O)=O</chem>                                                            |
| Name:       | D476; 2-(3-(diphenylhexatrienyl)propanoyl)-1-hexadecanoyl-sn-glycero-3-phosphocholine; Beta-DPH HPC                                                           |
| Method:     | Fluorescence Microscopy                                                                                                                                       |
| References: | 657                                                                                                                                                           |
| Structure:  | <chem>CCCCCCCCCCCCCCCC(=O)OCC(COP([O-])(=O)OCC[N+](C)(C)C)OC(=O)CCc1ccc(\C=C/C=C/C=C\c2cccc2)cc1</chem>                                                       |
| Name:       | C3927MP; Cholesteryl 4,4-difluoro-5,7-dimethyl-4-bora-3a,4a-diaza-s-indacene-3-dodecanoate; Cholesteryl BODIPY® FL C12                                        |
| Method:     | Fluorescence Microscopy                                                                                                                                       |
| References: | 659                                                                                                                                                           |
| Structure:  | <chem>CC(C)CCCC(C)C1CCC2C3CC=C4CC(CCC4(C)C3CCC12C)OC(=O)CCCCCCCCCCCC1=[N+]2C(C=C1)=Cc1c(C)cc(C)n1[B-]2(F)F</chem>                                             |
| Name:       | D3883; 4-Di-16-ASP (4-(4-(dihexadecylamino)styryl)-N-methylpyridinium iodide; DiA                                                                             |
| Method:     | Fluorescence Microscopy                                                                                                                                       |
| References: | 612                                                                                                                                                           |
| Structure:  | <chem>CCCCCCCCCCCCCCCCN(CCCCCCCCCCCC)CCCC)c1ccc(cc1)\C=C\c1cc[n+](C)cc1</chem>                                                                                |

|             |                                                                                                                                                   |
|-------------|---------------------------------------------------------------------------------------------------------------------------------------------------|
| Name:       | D3803; 2-(4,4-difluoro-5,7-dimethyl-4-bora-3a,4a-diaza-s-indacene-3-pentanoyl)-1-hexadecanoyl-sn-glycero-3-phosphocholine; Beta-BODIPY® FL C5-HPC |
| Method:     | Fluorescence Microscopy                                                                                                                           |
| References: | 660                                                                                                                                               |
| Structure:  | <chem>CCCCCCCCCCCCCCCC(=O)OCC(COP([O-])(=O)OCC[N+](C)(C)C)OC(=O)CCCC1=[N+]2C(C=C1)=Cc1c(C)cc(C)n1[B-]2(F)F</chem>                                 |
| Name:       | D11253,3'-dihexadecyloxacarboyanine perchlorate; DiOC16(3)                                                                                        |
| Method:     | Fluorescence Microscopy                                                                                                                           |
| References: | 639                                                                                                                                               |
| Structure:  | <chem>CCCCCCCCCCCCCCCCN1\C(Oc2cccc12)=C/C=C/c1oc2cccc2[n+]1CCCCCCCCCCCCCCC</chem>                                                                 |
| Name:       | H361; 1-hexadecanoyl-2-(1-pyrenedecanoyl)-sn-glycero-3-phosphocholine; Beta-py-C10-HPC                                                            |
| Method:     | Pharmacological Effect                                                                                                                            |
| References: | 666                                                                                                                                               |
| Structure:  | <chem>CCCCCCCCCCCCCCCC(=O)OCC(COP([O-])(=O)OCC[N+](C)(C)C)OC(=O)CCCCCCCc1cc2ccc3cccc4ccc(c1)c2c34</chem>                                          |
| Name:       | D3771; 2-decanoyl-1-(O-(11-(4,4-difluoro-5,7-dimethyl-4-bora-3a,4a-diaza-s-indacene-3-propionyl)amino)undecyl)-sn-glycero-3-phosphocholine        |
| Method:     | NA                                                                                                                                                |
| References: | Invi                                                                                                                                              |
| Structure:  | <chem>CCCCCCCCCCC(=O)OC(COCCCCCCCCCCCCNC(=O)CCC1=[N+]2C(C=C1)=Cc1c(C)cc(C)n1[B-]2(F)F)COP([O-])(=O)OCC[N+](C)(C)C</chem>                          |
| Name:       | N3787; 2-(12-(7-nitrobenz-2-oxa-1,3-diazol-4-yl)amino)dodecanoyl-1-hexadecanoyl-sn-glycero-3-phosphocholine; NBD C12-HPC                          |
| Method:     | Fluorescence Microscopy                                                                                                                           |
| References: | 725                                                                                                                                               |
| Structure:  | <chem>CCCCCCCCCCCCCCCC(=O)OCC(COP([O-])(=O)OCC[N+](C)(C)C)OC(=O)CCCCCCCCCCCNC1ccc(c2nonc12)N(=O)=O</chem>                                         |
| Name:       | H3809; 1-hexadecanoyl-2-(1-pyrenedecanoyl)-sn-glycero-3-phosphoglycerol, ammonium salt; Beta-py-C10-PG                                            |
| Method:     | NA                                                                                                                                                |
| References: | Invi                                                                                                                                              |
| Structure:  | <chem>CCCCCCCCCCCCCCCC(=O)OCC(COP([O-])(=O)OCC(O)CO)OC(=O)CCCCCCCCCc1cc2ccc3cccc4ccc(c1)c2c34</chem>                                              |
| Name:       | D7711; N-(4,4-difluoro-5,7-dimethyl-4-bora-3a,4a-diaza-s-indacene-3-dodecanoyl) sphingosyl phosphocholine; BODIPY® FL C12-sphingomyelin           |
| Method:     | Fluorescence Microscopy                                                                                                                           |



|             |                                                                                                                                                      |
|-------------|------------------------------------------------------------------------------------------------------------------------------------------------------|
| References: | 611                                                                                                                                                  |
| Structure:  | <chem>CCCCCCCCCCCCC=C/C(O)C(COP([O-])(=O)OCC[N+](C)(C)C)NC(=O)CCCCCCCCCCCC1=[N+]2C(C=C1)=Cc1c(C)cc(C)n1[B-]2(F)F</chem>                              |
| Name:       | D3898; 3,3'-dilinoyleloxacarboxyanine perchlorate; FAST DiO™ solid; DiODelta9,12-C18(3), ClO4                                                        |
| Method:     | NA                                                                                                                                                   |
| References: | Invi                                                                                                                                                 |
| Structure:  | <chem>CCCCC\C=C\C=C\C\CCCCCCCCN1\C(Oc2ccc(C)cc2)=C/C=C/c1oc2cccc2[n+]1CCCCCCCCC\C=C\C\C=C\C\CCCCC</chem>                                             |
| Name:       | D384; 1,1'-dihexadecyl-3,3,3',3'-tetramethylindocarbocyanine perchlorate; DiIC16(3)                                                                  |
| Method:     | Fluorescence Microscopy                                                                                                                              |
| References: | 615                                                                                                                                                  |
| Structure:  | <chem>CCCCCCCCCCCCCCCCCN1c2cccc2C(C)(C)\C1=C/C=C/C1=[N+](CCCCCCCCCCCCCCCCC)c2cccc2C1(C)C</chem>                                                      |
| Name:       | D275; 3,3'-dioctadecyloxacarboxyanine perchlorate                                                                                                    |
| Method:     | Fluorescence Microscopy                                                                                                                              |
| References: | 641                                                                                                                                                  |
| Structure:  | <chem>CCCCCCCCCCCCCCCCCN1\C(Oc2cccc12)=C/C=C/c1oc2cccc2[n+]1CCCCCCCCCCCCCCCCC</chem>                                                                 |
| Name:       | D3793; 2-(4,4-difluoro-5-methyl-4-bora-3a,4a-diaza-s-indacene-3-dodecanoyl)-1-hexadecanoyl-sn-glycero-3-phosphocholine; Beta-BODIPY® 500/510 C12-HPC |
| Method:     | Fluorescence Microscopy                                                                                                                              |
| References: | 642                                                                                                                                                  |
| Structure:  | <chem>CCCCCCCCCCCCCCCC(=O)OCC(COP([O-])(=O)OCC[N+](C)(C)C)OC(=O)CCCCCCCCCCCC1=[N+]2C(C=C1)=Cc1ccc(C)n1[B-]2(F)F</chem>                               |
| Name:       | D3792; 2-(4,4-difluoro-5,7-dimethyl-4-bora-3a,4a-diaza-s-indacene-3-dodecanoyl)-1-hexadecanoyl-sn-glycero-3-phosphocholine; Beta-BODIPY® FL C12-HPC  |
| Method:     | Fluorescence Microscopy                                                                                                                              |
| References: | 611                                                                                                                                                  |
| Structure:  | <chem>CCCCCCCCCCCCCCCC(=O)OCC(COP([O-])(=O)OCC[N+](C)(C)C)OC(=O)CCCCCCCCCCCC1=[N+]2C(C=C1)=Cc1c(C)cc(C)n1[B-]2(F)F</chem>                            |
| Name:       | D7758; 4-(4-(dilinoylelamino)styryl)-N-methylpyridinium 4-chlorobenzenesulfonate; FAST DiA™ solid; DiDelta9,12-C18ASP, CBS                           |
| Method:     | Fluorescence Microscopy                                                                                                                              |
| References: | 616                                                                                                                                                  |
| Structure:  | <chem>CCCCC\C=C\C=C\C\CCCCCCCCN(CCCCCC</chem>                                                                                                        |

|             |                                                                                                                                                        |
|-------------|--------------------------------------------------------------------------------------------------------------------------------------------------------|
| Structure:  | <chem>CC\C=C\C\C=C/C/CCCC)c1ccc(cc1)\C=C\c1cc[n+](C)cc1</chem>                                                                                         |
| Name:       | D3815; 2-(4,4-difluoro-5,7-diphenyl-4-bora-3a,4a-diaza-s-indacene-3-pentanoyl)-1-hexadecanoyl-sn-glycero-3-phosphocholine; Beta-BODIPY® 530/550 C5-HPC |
| Method:     | Fluorescence Microscopy                                                                                                                                |
| References: | 642                                                                                                                                                    |
| Structure:  | <chem>CCCCCCCCCCCCCCCC(=O)OCC(COP([O-])(=O)OCC[N+](C)(C)C)OC(=O)CCCCC1=[N+]2C(C=C1)=Cc1c(cc(-c3cccc3)n1[B-]2(F)F)-c1cccc1</chem>                       |
| Name:       | D3886; 1,1'-dioleyl-3,3,3',3'-tetramethylindocarbocyanine methanesulfonate; Delta9-DiI                                                                 |
| Method:     | NA                                                                                                                                                     |
| References: | Invi                                                                                                                                                   |
| Structure:  | <chem>CCCCCCCCC\C=C\C\CCCCCCCCCN1c2cccc2C(C)(C)\C1=C\C=C/C1=[N+](CCCCCCCCC\C=C\C\CCCCCCCC)c2cccc2C1(C)C</chem>                                         |
| Name:       | D3899; 1,1'-dilinoylel-3,3,3',3'-tetramethylindocarbocyanine perchlorate; FAST DiI™ oil; DiIDelta9,12-C18(3), ClO4                                     |
| Method:     | Fluorescence Microscopy                                                                                                                                |
| References: | 611                                                                                                                                                    |
| Structure:  | <chem>CCCCC\C=C\C\C=C\C\CCCCCCCCCN1c2cccc2C(C)(C)\C1=C\C=C/C1=[N+](CCCCCCCCC\C=C\C\C\C=C\C\CCCCC)c2cccc2C1(C)C</chem>                                  |
| Name:       | D282; 1,1'-dioctadecyl-3,3,3',3'-tetramethylindocarbocyanine perchlorate; DiI'; DiIC18(3)                                                              |
| Method:     | Fluorescence Microscopy                                                                                                                                |
| References: | 641, 645                                                                                                                                               |
| Structure:  | <chem>CCCCCCCCCCCCCCCCCN1c2cccc2C(C)(C)\C1=C/C=C/C1=[N+](CCCCCCCCCCCCCCCCC)c2cccc2C1(C)C</chem>                                                        |
| Name:       | M12652; Marina Blue® 1,2-dihexadecanoyl-sn-glycero-3-phosphoethanolamine; Marina Blue® DHPE                                                            |
| Method:     | NA                                                                                                                                                     |
| References: | Invi                                                                                                                                                   |
| Structure:  | <chem>CCCCCCCCCCCCCCCC(=O)OCC(COP([O-])(=O)OCCNC(=O)CC1=C(C)c2cc(F)c([O-])c(F)c2OC1=O)OC(=O)CCCCCCCCCCCCC</chem>                                       |
| Name:       | N360; N-(7-nitrobenz-2-oxa-1,3-diazol-4-yl)-1,2-dihexadecanoyl-sn-glycero-3-phosphoethanolamine, triethylammonium salt; NBD-PE                         |
| Method:     | Fluorescence Microscopy                                                                                                                                |
| References: | 8, 617                                                                                                                                                 |
| Structure:  | <chem>CCCCCCCCCCCCCCCC(=O)OCC(COP([O-])(=O)OCCNc1ccc(c2nonc12)N(=O)=O)OC(=O)CCCCCCCCCCCCC</chem>                                                       |

|             |                                                                                                                                        |
|-------------|----------------------------------------------------------------------------------------------------------------------------------------|
| Name:       | D307; 1,1'-dioctadecyl-3,3,3',3'-tetramethylindodicarbocyanine perchlorate; DiD' oil; DiIC18(5) oil                                    |
| Method:     | Fluorescence Microscopy                                                                                                                |
| References: | 685                                                                                                                                    |
| Structure:  | <chem>CCCCCCCCCCCCCCCCCN1c2ccccc2C(C)(C)\C1=C\C=C\C=C\C1=[N+](CCCCCCCCCCCCCCCCC)c2ccccc2C1(C)C</chem>                                  |
| Name:       | P22652; Pacific Blue™ 1,2-ditetradecanoyl-sn-glycero-3-phosphoethanolamine, triethylammonium salt; Pacific Blue™ DMPE                  |
| Method:     | NA                                                                                                                                     |
| References: | Invi                                                                                                                                   |
| Structure:  | <chem>CCCCCCCCCCCCCCCC(=O)OCC(COP([O-])(=O)OCCNC(=O)C1=Cc2cc(F)c([O-])c(F)c2OC1=O)OC(=O)CCCCCCCCCCCC</chem>                            |
| Name:       | D7776; 1,1'-dioctadecyl-3,3,3',3'-tetramethylindodicarbocyanine-5,5'-disulfonic acid; DiIC18(3)-DS                                     |
| Method:     | NA                                                                                                                                     |
| References: | Invi                                                                                                                                   |
| Structure:  | <chem>CCCCCCCCCCCCCCCCCN1c2ccc(cc2C(C)(C)\C1=C/C=C/C1=[N+](CCCCCCCCCCCCCCCCC)c2ccc(cc2C1(C)C)S([O-])(=O)=O)S([O-])(=O)=O</chem>        |
| Name:       | D6562; 1,2-dioleoyl-3-(1-pyrenedodecanoyl)-rac-glycerol                                                                                |
| Method:     | NA                                                                                                                                     |
| References: | Invi                                                                                                                                   |
| Structure:  | <chem>CCCCCCCC\C=C\C\CCCCCCCC(=O)OCC(CO C(=O)CCCCCCCCCCCCc1ccc2ccc3cccc4ccc1c2c34)OC(=O)CCCCCCCC\C=C\CCCCCCCC</chem>                   |
| Name:       | D12731; 1,1'-dioctadecyl-3,3,3',3'-tetramethylindotricarbocyanine iodid; DiR; DiIC18(7)                                                |
| Method:     | Fluorescence Microscopy                                                                                                                |
| References: | 664                                                                                                                                    |
| Structure:  | <chem>CCCCCCCCCCCCCCCCCN1c2ccccc2C(C)(C)\C1=C\C=C\C=C\C=C\C1=[N+](CCCCCCCCCCCCCCCCC)c2ccccc2C1(C)C</chem>                              |
| Name:       | B1550; N-(biotinoyl)-1,2-dihexadecanoyl-sn-glycero-3-phosphoethanolamine, triethylammonium salt; Biotin DHPE                           |
| Method:     | NA                                                                                                                                     |
| References: | Invi                                                                                                                                   |
| Structure:  | <chem>CCCCCCCCCCCCCCCC(=O)OCC(COP([O-])(=O)OCCNC(=O)CCCC1SCC2NC(=O)NC12)OC(=O)CCCCCCCCCCCC</chem>                                      |
| Name:       | D57; N-(5-dimethylaminonaphthalene-1-sulfonyl)-1,2-dihexadecanoyl-sn-glycero-3-phosphoethanolamine, triethylammonium salt; Dansyl DHPE |
| Method:     | NA                                                                                                                                     |
| References: | Invi                                                                                                                                   |
| Structure:  | <chem>CCCCCCCCCCCCCCCC(=O)OCC(COP([O-</chem>                                                                                           |

|             |                                                                                                                                                         |
|-------------|---------------------------------------------------------------------------------------------------------------------------------------------------------|
| Name:       | B7701; 1,2-bis-(4,4-difluoro-5,7-dimethyl-4-bora-3a,4a-diaza-s-indacene-3-undecanoyl)-sn-glycero-3-phosphocholine; Bis-BODIPY® FL C11-PC                |
| Method:     | Fluorescence Microscopy                                                                                                                                 |
| References: | 648                                                                                                                                                     |
| Structure:  | <chem>Cc1cc(C)n2c1C=C1C=CC(CCCCCCCCCC(=O)OCC(COP([O-])(=O)OCC[N+](C)(C)C)OC(=O)CCCCCCCCCCC3=[N+]4C(C=C3)=Cc3c(C)cc(C)n3[B-]4(F)F)=[N+]1[B-]2(F)F</chem> |
| Name:       | C7000; CellTracker™ CM-DiI                                                                                                                              |
| Method:     | Fluorescence Microscopy                                                                                                                                 |
| References: | 618                                                                                                                                                     |
| Structure:  | <chem>CCCCCCCCCCCCCCCCCN1c2ccccc2C(C)(C)\C1=C\C=C\C1=[N+](CCCCCCCCCCCCCCCCC)c2ccc(CNC(=O)c3ccc(CCl)cc3)cc2C1(C)C</chem>                                 |
| Name:       | O12650; Oregon Green® 488 1,2-dihexadecanoyl-sn-glycero-3-phosphoethanolamine; Oregon Green® 488 DHPE                                                   |
| Method:     | NA                                                                                                                                                      |
| References: | Invi                                                                                                                                                    |
| Structure:  | <chem>CCCCCCCCCCCCCCCC(=O)OCC(COP([O-])(=O)OCCNC(=O)c1ccc(c(c1)C([O-])=O)C1=C2C=C(F)C(=O)C=C2Oc2cc(O)c(F)c12)OC(=O)CCCCCCCCCCCC</chem>                  |
| Name:       | D7778; 3,3'-dioctadecyl-5,5'-di(4-sulfophenyl)oxacarbo-cyanine, sodium salt; SP-DiOC18(3)                                                               |
| Method:     | Fluorescence Microscopy                                                                                                                                 |
| References: | 727                                                                                                                                                     |
| Structure:  | <chem>CCCCCCCCCCCCCCCCCN1\C(Oc2ccc(cc12)-c1ccc(cc1)S([O-])(=O)=O)=C/C=C/c1oc2ccc(cc2[n+]1CCCCCCCCCCCCCCCC)-c1ccc(cc1)S([O-])(=O)=O</chem>               |
| Name:       | B1616; N-((6-(biotinoyl)amino)hexanoyl)-1,2-dihexadecanoyl-sn-glycero-3-phosphoethanolamine, triethylammonium salt; Biotin-X DHPE                       |
| Method:     | NA                                                                                                                                                      |
| References: | Invi                                                                                                                                                    |
| Structure:  | <chem>CCCCCCCCCCCCCCCC(=O)OCC(COP([O-])(=O)OCCNC(=O)CCCCNC(=O)CCCC1SCC2NC(=O)NC12)OC(=O)CCCCCCCCCCCCCCC</chem>                                          |
| Name:       | D7777; 1,1'-dioctadecyl-6,6'-di(4-sulfophenyl)-3,3,3',3'-tetramethylindodicarbocyanine; SP-DiIC18(3)                                                    |
| Method:     | Fluorescence Microscopy                                                                                                                                 |
| References: | 649                                                                                                                                                     |
| Structure:  | <chem>CCCCCCCCCCCCCCCCCN1c2ccc(cc2C(C)</chem>                                                                                                           |

|             |                                                                                                                                                       |
|-------------|-------------------------------------------------------------------------------------------------------------------------------------------------------|
|             | <chem>(C)C1=C\C=C\C1=[N+](CCCCCCCCCCCCCCCC)C2CC(CCC2C1(C)C)-c1ccc(cc1)S([O-])(=O)=O-c1ccc(cc1)S([O-])(=O)=O</chem>                                    |
| Name:       | F362; N-(fluorescein-5-thiocarbamoyl)-1,2-dihexadecanoyl-sn-glycero-3-phosphoethanolamine, triethylammonium salt; Fluorescein DHPE                    |
| Method:     | NA                                                                                                                                                    |
| References: | Invi                                                                                                                                                  |
| Structure:  | <chem>CCCCCCCCCCCCCCCC(=O)OCC(COP([O-])(=O)OCCNC(=S)Nc1ccc(c(c1)C([O-])(=O)C1=C2C=CC(=O)C=C2O)c2cc(O)ccc12)OC(=O)CCCCCCCCCCCCCCCC</chem>              |
| Name:       | T1391; N-(6-tetramethylrhodaminethiocarbamoyl)-1,2-dihexadecanoyl-sn-glycero-3-phosphoethanolamine, triethylammonium salt; TRITC DHPE                 |
| Method:     | Fluorescence Microscopy                                                                                                                               |
| References: | 679                                                                                                                                                   |
| Structure:  | <chem>CCCCCCCCCCCCCCCC(=O)OCC(COP([O-])(=O)OCCNC(=S)Nc1ccc(C([O-])(=O)c(c1)C1=C2C=C/C(/C=C2O)c2cc(ccc12)N(C)C)=[N+](\C)C)OC(=O)CCCCCCCCCCCCCCC</chem> |
| Name:       | Hostalux SN                                                                                                                                           |
| Method:     | Fluorescence Microscopy                                                                                                                               |
| References: | 55                                                                                                                                                    |
| Structure:  | <chem>CC(C)COCCS(=O)(=O)c1ccc(cc1)N1CCC(=N1)c1ccc(Cl)cc1</chem>                                                                                       |
| Name:       | Uvitex EBF                                                                                                                                            |
| Method:     | Fluorescence Microscopy                                                                                                                               |
| References: | 55                                                                                                                                                    |
| Structure:  | <chem>c1ccc2oc(nc2c1)-c1csc(c1)-c1nc2cccc2o1</chem>                                                                                                   |
| Name:       | Blancophor DCR                                                                                                                                        |
| Method:     | Fluorescence Microscopy                                                                                                                               |
| References: | 55                                                                                                                                                    |
| Structure:  | <chem>CS(=O)(=O)c1ccc(cc1)N1CCC(=N1)c1ccc(Cl)cc1</chem>                                                                                               |
| Name:       | MPPT                                                                                                                                                  |
| Method:     | Fluorescence Microscopy                                                                                                                               |
| References: | 55                                                                                                                                                    |
| Structure:  | <chem>Cn1c(nc2cccc12)-c1ccc(s1)C1=NN(CC1)c1cccc1</chem>                                                                                               |
| Name:       | 3-Cyanoperylene                                                                                                                                       |
| Method:     | Fluorescence Microscopy                                                                                                                               |
| References: | 55                                                                                                                                                    |
| Structure:  | <chem>N#Cc1ccc2c3cccc4cccc(c5cccc1c25)c34</chem>                                                                                                      |
| Name:       | ZnPcS3C6                                                                                                                                              |
| Method:     | Fluorescence Microscopy                                                                                                                               |
| References: | 88                                                                                                                                                    |
| Structure:  | <chem>CCCC#Cc1ccc2c3nc4nc(nc5n6[Zn]n3c(nc3nc</chem>                                                                                                   |

|             |                                                                                                                                            |
|-------------|--------------------------------------------------------------------------------------------------------------------------------------------|
|             | <chem>(nc6c6ccc(cc56)S([O-])(=O)=O)c5cc(ccc35)S([O-])(=O)=O)c2c1)c1ccc(cc41)S([O-])(=O)=O</chem>                                           |
| Name:       | ZnPcS3C9                                                                                                                                   |
| Method:     | Fluorescence Microscopy                                                                                                                    |
| References: | 88                                                                                                                                         |
| Structure:  | <chem>CCCCCCCC#Cc1ccc2c3nc4nc(nc5n6[Zn]n3c(nc3nc(nc6c6ccc(cc56)S([O-])(=O)=O)c5cc(ccc35)S([O-])(=O)=O)c2c1)c1ccc(cc41)S([O-])(=O)=O</chem> |
| Name:       | Rhodac                                                                                                                                     |
| Method:     | Fluorescence Microscopy                                                                                                                    |
| References: | 102                                                                                                                                        |
| Structure:  | <chem>CCOC(=C\C=C\C1\SC(\C=C2\SC(c3cccc3)=C(N2CC)c2cccc2)=[N+](CC)C1=O)\C=C1\Sc2cc(C)cc2N1CC</chem>                                        |
| Name:       | 3-THPP; tetra(3-hydroxyphenyl)porphine                                                                                                     |
| Method:     | Fluorescence Microscopy                                                                                                                    |
| References: | 111                                                                                                                                        |
| Structure:  | <chem>Oc1cccc(c1)-c1c2ccc(n2)c(-c2cccc(O)c2)c2ccc([nH]2)c(-c2cccc(O)c2)c2ccc(n2)c(-c2cccc(O)c2)c2ccc1[nH]2</chem>                          |
| Name:       | Cytochalasin D                                                                                                                             |
| Method:     | Cell Fractionation                                                                                                                         |
| References: | 143                                                                                                                                        |
| Structure:  | <chem>CC1C\C=C\C2C(O)C(=C)C(C)C3C(Cc4cccc4)NC(=O)C23C(OC(C)=O)\C=C\C(C)(O)C1=O</chem>                                                      |
| Name:       | HBDP-R1; 2, -(N,N-dimethylamino)-propylamine-HB                                                                                            |
| Method:     | Fluorescence Microscopy                                                                                                                    |
| References: | 186                                                                                                                                        |
| Structure:  | <chem>COC1=CC(=O)c2c(NCCC[NH+](C)C)c(OC)c3CC(C)=C(C(C)=O)c4c(OC)c(NCCC[NH+](C)C)c5C(=O)C=C(OC)c6c1c2c3c4c56</chem>                         |
| Name:       | CIBC Derivative 2                                                                                                                          |
| Method:     | Fluorescence Microscopy                                                                                                                    |
| References: | 227                                                                                                                                        |
| Structure:  | <chem>CCC1C(C)c2cc3[nH]c(cc4nc(C(CCC([O-])(=O)C4C)c4C(=O)N(OC)C(=O)c5c(C)c(cc1n2)[nH]c45)c(C)c3C(C)O</chem>                                |
| Name:       | CICD Derivative 5; 13,15-N-cycloimide Derivatives of Chlorin p10                                                                           |
| Method:     | Fluorescence Microscopy                                                                                                                    |
| References: | 86                                                                                                                                         |
| Structure:  | <chem>CCc1c(C)c2cc3[nH]c(cc4nc(C(CCC(=O)OC)C4C)c4C(=O)N(OC)C(=O)c5c(C)c(cc1n2)[nH]c45)c(C)c3C=C</chem>                                     |
| Name:       | di-4-ANEPPDHQ                                                                                                                              |
| Method:     | Fluorescence Microscopy                                                                                                                    |
| References: | 291                                                                                                                                        |
| Structure:  | <chem>CCCCN(CCCC)c1ccc2cc(CCc3cc[n+](CC(O)C</chem>                                                                                         |

|             |                                                                                                                                                      |
|-------------|------------------------------------------------------------------------------------------------------------------------------------------------------|
|             | <chem>[N+](C)(C)CCO)cc3)ccc2c1</chem>                                                                                                                |
| Name:       | Evans Blue                                                                                                                                           |
| Method:     | Fluorescence Microscopy                                                                                                                              |
| References: | 294                                                                                                                                                  |
| Structure:  | <chem>Cc1cc(ccc1N\N=C1/C=Cc2c(cc(c(N)c2C1=O)S([O-])(=O)=O)S([O-])(=O)=O)-c1ccc(N\N=C2/C=Cc3c(cc(c(N)c3C2=O)S([O-])(=O)=O)S([O-])(=O)=O)c(C)c1</chem> |
| Name:       | SnNT2H2 (Cl2)                                                                                                                                        |
| Method:     | Fluorescence Microscopy                                                                                                                              |
| References: | 332                                                                                                                                                  |
| Structure:  | <chem>CCOC(=O)C1Cc2c3[n+]+4c(cc5c(CC)c(CC)c6cc7c(CC)c(CC)c8cc9c(CC)c(CC)c2n9[Sn]4(n56)[n+]+78)C(CC)C13CC</chem>                                      |
| Name:       | EBCS                                                                                                                                                 |
| Method:     | Fluorescence Microscopy                                                                                                                              |
| References: | 332                                                                                                                                                  |
| Structure:  | <chem>CCc1c(C)c2cc3[nH]c(c(C)c3CC)c3cccc4c3nc(c3[nH]c(cc1n2)c(C)c3CC)C4(C)CC</chem>                                                                  |
| Name:       | SnEBCS                                                                                                                                               |
| Method:     | Fluorescence Microscopy                                                                                                                              |
| References: | 332                                                                                                                                                  |
| Structure:  | <chem>CCc1c(C)c2cc3c(CC)c(C)c4cc5c(CC)c(C)c6n5[Sn]5(n2c1cc1[n+]+5c2c(cc(cc62)S([O-])(=O)=O)C1(C)CC)[n+]+34</chem>                                    |
| Name:       | JPW-3028; Di-1-ANEPEQ                                                                                                                                |
| Method:     | Fluorescence Microscopy                                                                                                                              |
| References: | 383                                                                                                                                                  |
| Structure:  | <chem>CN(C)c1ccc2cc(ccc2c1)\C=C\c1cc[n+](CC[N+](C)(C)C)cc1</chem>                                                                                    |
| Name:       | JPW-3080; Di-1-APEFEQPQ                                                                                                                              |
| Method:     | Fluorescence Microscopy                                                                                                                              |
| References: | 383                                                                                                                                                  |
| Structure:  | <chem>CN(C)c1ccc(\C=C\c2ccc(\C=C\c3cc[n+](CCC[N+](C)(C)C)c4cccc34)o2)cc1</chem>                                                                      |
| Name:       | JPW-600; Di-4-ANBDQPQ                                                                                                                                |
| Method:     | Fluorescence Microscopy                                                                                                                              |
| References: | 383                                                                                                                                                  |
| Structure:  | <chem>CCCCN(CCCC)c1ccc2cc(\C=C\C=C\c3cc[n+](CCC[N+](C)(C)C)c4cccc34)ccc2c1</chem>                                                                    |
| Name:       | JPW-4090; Di-2-ANBDQPQ                                                                                                                               |
| Method:     | Fluorescence Microscopy                                                                                                                              |
| References: | 383                                                                                                                                                  |
| Structure:  | <chem>CCN(CC)c1ccc2cc(\C=C\C=C\c3cc[n+](CCC[N+](C)(C)C)c4cccc34)ccc2c1</chem>                                                                        |
| Name:       | PY-1261; Di-2-BTEPPTEA                                                                                                                               |
| Method:     | Fluorescence Microscopy                                                                                                                              |
| References: | 383                                                                                                                                                  |
| Structure:  | <chem>CCN(CC)c1ccc(s1)-c1ccc(\C=C\c2cc[n+](CCC[N+](CC)(CC)CC)c2)s1</chem>                                                                            |

|             |                                                                                                   |
|-------------|---------------------------------------------------------------------------------------------------|
| Name:       | PY-1268; Di-2-TTEPPTEA                                                                            |
| Method:     | Fluorescence Microscopy                                                                           |
| References: | 383                                                                                               |
| Structure:  | <chem>CCN(CC)c1ccc(s1)-c1ccc(s1)-c1ccc(\C=C\c2cc[n+](CCC[N+](CC)(CC)CC)c2)s1</chem>               |
| Name:       | PY-1286; Di-3-BTEPPTEA                                                                            |
| Method:     | Fluorescence Microscopy                                                                           |
| References: | 383                                                                                               |
| Structure:  | <chem>CCCN(CCC)c1ccc(s1)-c1ccc(\C=C\c2cc[n+](CCC[N+](CC)(CC)CC)c2)s1</chem>                       |
| Name:       | PY-1266; Di-4-BTEPPTEA                                                                            |
| Method:     | Fluorescence Microscopy                                                                           |
| References: | 383                                                                                               |
| Structure:  | <chem>CCCCN(CCCC)c1ccc(s1)-c1ccc(\C=C\c2cc[n+](CCC[N+](CC)(CC)CC)c2)s1</chem>                     |
| Name:       | JPW-3067                                                                                          |
| Method:     | Fluorescence Microscopy                                                                           |
| References: | 384                                                                                               |
| Structure:  | <chem>CN(C)c1ccc(\C=C\c2ccc(\C=C\C3=[N+](CCC[N+](C)(C)C)c4cccc4C3(C)C)s2)cc1</chem>               |
| Name:       | JPW-5034                                                                                          |
| Method:     | Fluorescence Microscopy                                                                           |
| References: | 384                                                                                               |
| Structure:  | <chem>CCCCN(CCCC)c1ccc(\C=C\c2ccc(\C=C\C3=[N+](CCC[N+](C)(C)C)c4cccc4C3(C)C)s2)cc1</chem>         |
| Name:       | JPW-5020                                                                                          |
| Method:     | Fluorescence Microscopy                                                                           |
| References: | 384                                                                                               |
| Structure:  | <chem>CCCCCCCCN(CCCCCCCC)c1ccc(\C=C\c2ccc(\C=C\C3=[N+](CCC[N+](C)(C)C)c4cccc4C3(C)C)s2)cc1</chem> |
| Name:       | di-4-ANEPPS                                                                                       |
| Method:     | Fluorescence Microscopy                                                                           |
| References: | 384                                                                                               |
| Structure:  | <chem>CCCCN(CCCC)c1ccc2cc(ccc2c1)\C=C\c1cc[n+](CCCS([O-])(=O)=O)cc1</chem>                        |
| Name:       | JPW-3012                                                                                          |
| Method:     | Fluorescence Microscopy                                                                           |
| References: | 385                                                                                               |
| Structure:  | <chem>C[N+](C)(C)CCC[n+]+1ccc(\C=C\c2cc3CCCN4CCCc(c2)c34)c2cccc12</chem>                          |
| Name:       | KDH-160                                                                                           |
| Method:     | Fluorescence Microscopy                                                                           |
| References: | 385                                                                                               |
| Structure:  | <chem>CCN1CCCc2ccc(\C=C\c3cc[n+](CCCS([O-])(=O)=O)c4cccc34)cc12</chem>                            |
| Name:       | JPW-3066                                                                                          |

|             |                                                                                                        |
|-------------|--------------------------------------------------------------------------------------------------------|
| Method:     | Fluorescence Microscopy                                                                                |
| References: | 385                                                                                                    |
| Structure:  | <chem>CN(C)c1ccc(\C=C\c2ccc(\C=C\c3cc[n+](CCC[N+](C)(C)C)c4cccc34)s2)cc1</chem>                        |
| Name:       | JPW-4012                                                                                               |
| Method:     | Fluorescence Microscopy                                                                                |
| References: | 385                                                                                                    |
| Structure:  | <chem>CCCCN(CCCC)c1ccc(\C=C\c2ccc(\C=C\c3cc[n+](CCC[N+](C)(C)C)c4cccc34)o2)cc1</chem>                  |
| Name:       | JPW-4023                                                                                               |
| Method:     | Fluorescence Microscopy                                                                                |
| References: | 385                                                                                                    |
| Structure:  | <chem>CCN(CC)c1ccc(\C=C\c2ccc(\C=C\c3cc[n+](CC[N+](C)(C)C)c4cccc34)o2)cc1</chem>                       |
| Name:       | RE-66                                                                                                  |
| Method:     | Fluorescence Microscopy                                                                                |
| References: | 385                                                                                                    |
| Structure:  | <chem>CCCCN(CCCC)c1ccc(cc1)\C=C\c1c2cccc2[n+](CCCCS([O-])(=O)=O)c2cccc12</chem>                        |
| Name:       | RE-136                                                                                                 |
| Method:     | Fluorescence Microscopy                                                                                |
| References: | 385                                                                                                    |
| Structure:  | <chem>CCCCN(CCCC)c1ccc(cc1)\C=C\c=C\c1c2cccc2[n+](CCCS([O-])(=O)=O)c2cccc12</chem>                     |
| Name:       | RK-57                                                                                                  |
| Method:     | Fluorescence Microscopy                                                                                |
| References: | 385                                                                                                    |
| Structure:  | <chem>CCCCOC1CN2CC(Cc3cc(\C=C\c4c5cccc5[n+](CCCS([O-])(=O)=O)c5cccc45)cc(C1)c23)OCCCC</chem>           |
| Name:       | JPW-5019                                                                                               |
| Method:     | Fluorescence Microscopy                                                                                |
| References: | 385                                                                                                    |
| Structure:  | <chem>CCCCCCCCN(CCCCCCCC)c1ccc(\C=C\c2cc(\C=C\c3cc[n+](CCC[N+](C)(C)C)c4cccc34)s2)cc1</chem>           |
| Name:       | JPW-5021                                                                                               |
| Method:     | Fluorescence Microscopy                                                                                |
| References: | 385                                                                                                    |
| Structure:  | <chem>CCCCCCCCN(CCCCCCCC)c1ccc(\C=C\c2cc(\C=C\c3cc[n+](CCC[N+](C)(C)C)c4cccc34)o2)cc1</chem>           |
| Name:       | JPW-5026                                                                                               |
| Method:     | Fluorescence Microscopy                                                                                |
| References: | 385                                                                                                    |
| Structure:  | <chem>CCCCCCCCCCCCCN(CCCCCCCCCCCC)c1ccc(\C=C\c2ccc(\C=C\c3cc[n+](CCC[N+](C)(C)C)c4cccc34)s2)cc1</chem> |
| Name:       | JPW-5028                                                                                               |
| Method:     | Fluorescence Microscopy                                                                                |
| References: | 385                                                                                                    |

|             |                                                                                                        |
|-------------|--------------------------------------------------------------------------------------------------------|
| Structure:  | <chem>CCCCCCCCCCCCCN(CCCCCCCCCCCC)c1ccc(\C=C\c2ccc(\C=C\c3cc[n+](CCC[N+](C)(C)C)c4cccc34)o2)cc1</chem> |
| Name:       | DB1-195                                                                                                |
| Method:     | Fluorescence Microscopy                                                                                |
| References: | 385                                                                                                    |
| Structure:  | <chem>CCCCN(CCCC)c1ccc(cc1)\C=C\c1c2cccc2[n+](CCCS([O-])(=O)=O)c2cccc12</chem>                         |
| Name:       | JPW-5031                                                                                               |
| Method:     | Fluorescence Microscopy                                                                                |
| References: | 385                                                                                                    |
| Structure:  | <chem>CCN(CC)c1ccc2cc(\C=C\c=C\c3=[N+](CCC[N+](C)(C)C)c4cccc4C3(C)C)ccc2c1</chem>                      |
| Name:       | DB2-039                                                                                                |
| Method:     | Fluorescence Microscopy                                                                                |
| References: | 385                                                                                                    |
| Structure:  | <chem>CCCCC1C(CCCC)Cc2cc(\C=C\c3cc[n+](CC[N+](C)(C)C)c4cccc34)cc3CCCN1c23</chem>                       |
| Name:       | JPW1114                                                                                                |
| Method:     | Fluorescence Microscopy                                                                                |
| References: | 411                                                                                                    |
| Structure:  | <chem>CCN(CC)c1ccc2cc(ccc2c1)\C=C\c1cc[n+](CC[N+](C)(C)C)cc1</chem>                                    |
| Name:       | RH795                                                                                                  |
| Method:     | Fluorescence Microscopy                                                                                |
| References: | 413                                                                                                    |
| Structure:  | <chem>CCCCN(CCCC)c1ccc(CCCCc2cc[n+](CC(O)C(C)(C)CCO)cc2)cc1</chem>                                     |
| Name:       | JPW3039                                                                                                |
| Method:     | Fluorescence Microscopy                                                                                |
| References: | 413                                                                                                    |
| Structure:  | <chem>CCN(CC)c1ccc2cc(ccc2c1)\C=C\c1cc[n+](CC(O)CC(C)(C)CCO)cc1</chem>                                 |
| Name:       | JPW2081                                                                                                |
| Method:     | Fluorescence Microscopy                                                                                |
| References: | 413                                                                                                    |
| Structure:  | <chem>CCCCN(CCCC)c1ccc2cc(ccc2c1)\C=C\c1cc[n+](CC(O)CC(C)(C)CCO)cc1</chem>                             |
| Name:       | JPW3031                                                                                                |
| Method:     | Fluorescence Microscopy                                                                                |
| References: | 413                                                                                                    |
| Structure:  | <chem>CCCCCN(CCCCCC)c1ccc2cc(\C=C\c3cc[n+](CC(O)CC(C)(C)CCO)cc3)ccc2c1</chem>                          |
| Name:       | JPW5037; di-8-ANEPPS                                                                                   |
| Method:     | Fluorescence Microscopy                                                                                |
| References: | 412, 413                                                                                               |
| Structure:  | <chem>CCCCCCCCCN(CCCCCCCC)c1ccc2cc(\C=C\c3cc[n+](CCCS([O-])(=O)=O)cc3)ccc2c1</chem>                    |
| Name:       | ANNINE-6plus                                                                                           |
| Method:     | Fluorescence Microscopy                                                                                |

|             |                                                                                                              |
|-------------|--------------------------------------------------------------------------------------------------------------|
| References: | 414                                                                                                          |
| Structure:  | <chem>CCCCN(CCCC)c1ccc2c(ccc3c2ccc2c4ccc5c[n+](CCC[N+](C)(C)C)ccc5c4ccc32)c1</chem>                          |
| Name:       | RH160                                                                                                        |
| Method:     | Fluorescence Microscopy                                                                                      |
| References: | 415                                                                                                          |
| Structure:  | <chem>CCCCN(CCCC)c1ccc(cc1)\C=C\C=C\c1cc[n+](CCCCS([O-])(=O)=O)cc1</chem>                                    |
| Name:       | di-4-ANEPBS                                                                                                  |
| Method:     | Fluorescence Microscopy                                                                                      |
| References: | 415                                                                                                          |
| Structure:  | <chem>CCCCN(CCCC)c1ccc2cc(ccc2c1)\C=C\c1cc[n+](CCCCS([O-])(=O)=O)cc1</chem>                                  |
| Name:       | BNBIQ                                                                                                        |
| Method:     | Fluorescence Microscopy                                                                                      |
| References: | 415                                                                                                          |
| Structure:  | <chem>CCCCN(CCCC)c1ccc2cc(ccc2c1)-c1ccc2c[n+](CCCCS([O-])(=O)=O)ccc2c1</chem>                                |
| Name:       | ANNINE-5                                                                                                     |
| Method:     | Fluorescence Microscopy                                                                                      |
| References: | 415                                                                                                          |
| Structure:  | <chem>CCCCN(CCCC)c1ccc2c(ccc3c2ccc2c4cc[n+](CCCCS([O-])(=O)=O)cc4ccc32)c1</chem>                             |
| Name:       | ANNINE-6                                                                                                     |
| Method:     | Fluorescence Microscopy                                                                                      |
| References: | 415                                                                                                          |
| Structure:  | <chem>CCCCN(CCCC)c1ccc2c(ccc3c2ccc2c4ccc5c[n+](CCCCS([O-])(=O)=O)ccc5c4ccc32)c1</chem>                       |
| Name:       | WW375                                                                                                        |
| Method:     | Fluorescence Microscopy                                                                                      |
| References: | 417                                                                                                          |
| Structure:  | <chem>CCN1C(=S)S\C=C/C=C\C=C=C2/C=CN(CCCS([O-])(=O)=O)c3ccccc23)C1=O</chem>                                  |
| Name:       | RH155                                                                                                        |
| Method:     | Fluorescence Microscopy                                                                                      |
| References: | 417                                                                                                          |
| Structure:  | <chem>CC1=NN(c2ccc(cc2)S([O-])(=O)=O)C(=O)C\1=C\C=C\C=C\c1c(C)nn(-c2ccc(cc2)S([O-])(=O)=O)c1O)c1cccc1</chem> |
| Name:       | WW781                                                                                                        |
| Method:     | Fluorescence Microscopy                                                                                      |
| References: | 417                                                                                                          |
| Structure:  | <chem>CCCCN1C(=O)N(CCCC)C(O)=C(\C=C\C=C\C=C=C2\C(C)=NN(C2=O)c2ccc(cc2)S([O-])(=O)=O)C1=O</chem>              |
| Name:       | C4A-FL                                                                                                       |
| Method:     | Fluorescence Microscopy                                                                                      |
| References: | 448                                                                                                          |
| Structure:  | <chem>[O-]C(=O)CCCc1ccc-2c(Cc3ccccc-23)c1</chem>                                                             |
| Name:       | C4A-FL-C4                                                                                                    |

|             |                                                                                                        |
|-------------|--------------------------------------------------------------------------------------------------------|
| Method:     | Fluorescence Microscopy                                                                                |
| References: | 448                                                                                                    |
| Structure:  | <chem>CCCc1ccc-2c(Cc3cc(CCCC([O-])=O)ccc-23)c1</chem>                                                  |
| Name:       | C8A-FL                                                                                                 |
| Method:     | Fluorescence Microscopy                                                                                |
| References: | 448                                                                                                    |
| Structure:  | <chem>[O-]C(=O)CCCCCCCc1ccc-2c(Cc3ccccc-23)c1</chem>                                                   |
| Name:       | C8A-FL-C4                                                                                              |
| Method:     | Fluorescence Microscopy                                                                                |
| References: | 448                                                                                                    |
| Structure:  | <chem>CCCc1ccc-2c(Cc3cc(CCCCCC([O-])=O)ccc-23)c1</chem>                                                |
| Name:       | C6A-FL                                                                                                 |
| Method:     | Fluorescence Microscopy                                                                                |
| References: | 448                                                                                                    |
| Structure:  | <chem>[O-]C(=O)CCCCc1ccc-2c(Cc3ccccc-23)c1</chem>                                                      |
| Name:       | C6A-FL-C2                                                                                              |
| Method:     | Fluorescence Microscopy                                                                                |
| References: | 448                                                                                                    |
| Structure:  | <chem>CCc1ccc-2c(Cc3cc(CCCCC([O-])=O)ccc-23)c1</chem>                                                  |
| Name:       | C6A-FL-C4                                                                                              |
| Method:     | Fluorescence Microscopy                                                                                |
| References: | 448                                                                                                    |
| Structure:  | <chem>CCCc1ccc-2c(Cc3cc(CCCCC([O-])=O)ccc-23)c1</chem>                                                 |
| Name:       | C6A-FL-C6                                                                                              |
| Method:     | Fluorescence Microscopy                                                                                |
| References: | 448                                                                                                    |
| Structure:  | <chem>CCCCCCc1ccc-2c(Cc3cc(CCCCC([O-])=O)ccc-23)c1</chem>                                              |
| Name:       | C6ABz PC                                                                                               |
| Method:     | Fluorescence Microscopy                                                                                |
| References: | 448                                                                                                    |
| Structure:  | <chem>CCCCCCCCCCCCC(=O)OCC(COP([O-])(=O)OCC[N+](C)(C)C)OC(=O)CCCCC1ccc(cc1)C(=O)c1cccc1</chem>         |
| Name:       | C6ABzC6                                                                                                |
| Method:     | Fluorescence Microscopy                                                                                |
| References: | 448                                                                                                    |
| Structure:  | <chem>CCCCCCCCCCCCC(=O)OCC(COP([O-])(=O)OCC[N+](C)(C)C)OC(=O)CCCCC1ccc(cc1)C(=O)c1ccc(CCCCC)cc1</chem> |
| Name:       | C8ABz PC                                                                                               |
| Method:     | Fluorescence Microscopy                                                                                |
| References: | 448                                                                                                    |
| Structure:  | <chem>CCCCCCCCCCCCC(=O)OCC(COP([O-])(=O)OCC[N+](C)(C)C)OC(=O)CCCCCCc1ccc(cc1)C(=O)c1cccc1</chem>       |

|             |                                                                                                              |
|-------------|--------------------------------------------------------------------------------------------------------------|
| Name:       | C8ABzC4 PC                                                                                                   |
| Method:     | Fluorescence Microscopy                                                                                      |
| References: | 448                                                                                                          |
| Structure:  | <chem>CCCCCCCCCCCCC(=O)OCC(COP([O-])(=O)OCC[N+](C)(C)C)OC(=O)CCCCCCCc1ccc(cc1)C(=O)c1ccc(CCCC)cc1</chem>     |
| Name:       | 1-Pyrene Butyric Acid; PBA                                                                                   |
| Method:     | Fluorescence Microscopy                                                                                      |
| References: | 456                                                                                                          |
| Structure:  | <chem>[O-]C(=O)CCCC1=CCC2=C3C4C(C=C2)=CC=C4=CC=C13</chem>                                                    |
| Name:       | Lepidine Dye                                                                                                 |
| Method:     | Fluorescence Microscopy                                                                                      |
| References: | 462                                                                                                          |
| Structure:  | <chem>CCCCN(CCCC)c1ccc(\C=C\c2ccc(\C=C\c3cc[n+](CCCCS([O-])(=O)=O)c4cccc34)s2)cc1</chem>                     |
| Name:       | Indolenine Dye                                                                                               |
| Method:     | Fluorescence Microscopy                                                                                      |
| References: | 462                                                                                                          |
| Structure:  | <chem>CCCCN(CCCC)c1ccc(\C=C\c2ccc(\C=C\c3=[N+](CCCCS([O-])(=O)=O)c4cccc4C3(C)C)s2)cc1</chem>                 |
| Name:       | Benzthiazole Dye                                                                                             |
| Method:     | Fluorescence Microscopy                                                                                      |
| References: | 462                                                                                                          |
| Structure:  | <chem>CCCCN(CCCC)c1ccc(\C=C\c2ccc(\C=C\c3sc4cccc4[n+]3CCCCS([O-])(=O)=O)s2)cc1</chem>                        |
| Name:       | Sulfindolenine Dye                                                                                           |
| Method:     | Fluorescence Microscopy                                                                                      |
| References: | 462                                                                                                          |
| Structure:  | <chem>CCCCN(CCCC)c1ccc(\C=C\c2ccc(\C=C\c3=[N+](CCCCS([O-])(=O)=O)c4ccc(cc4C3(C)C)S([O-])(=O)=O)s2)cc1</chem> |
| Name:       | Benzoxazole Dye                                                                                              |
| Method:     | Fluorescence Microscopy                                                                                      |
| References: | 462                                                                                                          |
| Structure:  | <chem>CCCCN(CCCC)c1ccc(\C=C\c2ccc(\C=C\c3oc4cccc4[n+]3CCCCS([O-])(=O)=O)s2)cc1</chem>                        |
| Name:       | Sulfoindolenine Dye                                                                                          |
| Method:     | Fluorescence Microscopy                                                                                      |
| References: | 462                                                                                                          |
| Structure:  | <chem>CCCCN(CCCC)c1ccc(\C=C\c2ccc(\C=C\c3=[N+](CC)c4cc(CS([O-])(=O)=O)ccc4C3(C)C)s2)cc1</chem>               |
| Name:       | Methoxyquinaldine Dye                                                                                        |
| Method:     | Fluorescence Microscopy                                                                                      |
| References: | 462                                                                                                          |
| Structure:  | <chem>CCCCN(CCCC)c1ccc(\C=C\c2ccc(C=Cc3ccc4cc(OC)ccc4[n+]3CCCCS([O-])(=O)=O)s2)cc1</chem>                    |

|             |                                                                                               |
|-------------|-----------------------------------------------------------------------------------------------|
| Name:       | Methoxyepidine Dye                                                                            |
| Method:     | Fluorescence Microscopy                                                                       |
| References: | 462                                                                                           |
| Structure:  | <chem>CCCCN(CCCC)c1ccc(\C=C\c2ccc(\C=C\c3cc[n+](CCCCS([O-])(=O)=O)c4ccc(OC)cc34)s2)cc1</chem> |
| Name:       | Amethyst Violet                                                                               |
| Method:     | Fluorescence Microscopy                                                                       |
| References: | 463                                                                                           |
| Structure:  | <chem>CCN(CC)c1ccc2nc3ccc(cc3[n+])(-c3cccc3)c2c1)N(CC)CC</chem>                               |
| Name:       | DiOC1(3)                                                                                      |
| Method:     | Fluorescence Microscopy                                                                       |
| References: | 463                                                                                           |
| Structure:  | <chem>CN1\C(Oc2cccc12)=C/C=C/c1oc2cccc2[n+]1C</chem>                                          |
| Name:       | RH355                                                                                         |
| Method:     | Fluorescence Microscopy                                                                       |
| References: | 464                                                                                           |
| Structure:  | <chem>CN(C)c1ccc(cc1)\C=C\C=C\c1cc[n+](CCC[N+](C)(C)C)cc1</chem>                              |
| Name:       | RH461                                                                                         |
| Method:     | Fluorescence Microscopy                                                                       |
| References: | 464                                                                                           |
| Structure:  | <chem>CCN(CC)c1ccc(cc1)\C=C\C=C\c1cc[n+](CCC[N+](C)(C)C)cc1</chem>                            |
| Name:       | RH437                                                                                         |
| Method:     | Fluorescence Microscopy                                                                       |
| References: | 464                                                                                           |
| Structure:  | <chem>CCCN(CCC)c1ccc(cc1)\C=C\C=C\c1cc[n+](CCC[N+](C)(C)C)cc1</chem>                          |
| Name:       | JPW1234                                                                                       |
| Method:     | Fluorescence Microscopy                                                                       |
| References: | 465                                                                                           |
| Structure:  | <chem>CCCCN(CCCC)c1ccc2cc(ccc2c1)\C=C\c1cc[n+](CC(C)CO)cc1</chem>                             |
| Name:       | JPW1259                                                                                       |
| Method:     | Fluorescence Microscopy                                                                       |
| References: | 465                                                                                           |
| Structure:  | <chem>CCCCN(CCCC)c1ccc2cc(\C=C\c3cc[n+](CC4OC(OC)C(O)C4O)cc3)ccc2c1</chem>                    |
| Name:       | JPW1290                                                                                       |
| Method:     | Fluorescence Microscopy                                                                       |
| References: | 465                                                                                           |
| Structure:  | <chem>CCN(CC)c1ccc2cc(ccc2c1)\C=C\c1cc[n+](CC(C)CO)cc1</chem>                                 |
| Name:       | F8N1S                                                                                         |
| Method:     | Fluorescence Microscopy                                                                       |
| References: | 466                                                                                           |
| Structure:  | <chem>CCCCCCCCN(CCCCCCCC)c1ccc(cc1)C1=C([O-])C(=O)c2cc(C[N+](C)(C)CCCS([O-</chem>             |

|             |                                                                                                    |
|-------------|----------------------------------------------------------------------------------------------------|
|             | <chem>]](=O)=O)ccc2O1</chem>                                                                       |
| Name:       | PPZ8                                                                                               |
| Method:     | Fluorescence Microscopy                                                                            |
| References: | 466                                                                                                |
| Structure:  | <chem>CCCCCCCCOc1ccc2OC(=C([O-])C(=O)c2c1)c1ccc(cc1)N1CCN(CC1)c1cc[n+](CCCS([O-])(=O)=O)cc1</chem> |
| Name:       | RH237                                                                                              |
| Method:     | Fluorescence Microscopy                                                                            |
| References: | 492                                                                                                |
| Structure:  | <chem>CCCCN(CCCC)c1ccc(cc1)\C=C\C=C\C=C\C=C1c[n+](CCCCS([O-])(=O)=O)cc1</chem>                     |
| Name:       | O <sup>6</sup> -Benzylguanine- Pennsylvania Green                                                  |
| Method:     | Fluorescence Microscopy                                                                            |

|             |                                                                                                                                             |
|-------------|---------------------------------------------------------------------------------------------------------------------------------------------|
| References: | 495                                                                                                                                         |
| Structure:  | <chem>Cc1cc(ccc1C1=C2C=C(F)C(=O)C=C2O)c2cc(O)c(F)cc12)C(=O)NCc1ccc(COc2nc(N)nc3[nH]cnc23)cc1</chem>                                         |
| Name:       | Pennsylvania Green Fluorophore Derivative 22                                                                                                |
| Method:     | Fluorescence Microscopy                                                                                                                     |
| References: | 498                                                                                                                                         |
| Structure:  | <chem>CC(C)CCCC(C)C1CCC2C3CC=C4CC(CCC4(C)C3CCC12C)[NH2+]CCCN(C(=O)CCNC(=O)CCNC(=O)c1ccc(c(C)c1)C1=C2C=C(F)C(=O)C=C2O)c2cc(O)c(F)cc12</chem> |
| Name:       | ::Pennsylvania Green Fluorophore Derivative 23::::                                                                                          |
| Method:     | Fluorescence Microscopy                                                                                                                     |
| References: | 498                                                                                                                                         |
| Structure:  | <chem>CC(C)CCCC(C)C1CCC2C3CC=C4CC(CCC4(C)C3CCC12C)[NH2+]CCCN(C(=O)CCNC(=O)CCNC(=O)c1ccc(c(C)c1)C1=C2C=CC(=O)C=C2O)c2cc(O)ccc12</chem>       |

**Supplemental Table 5: The chemical compounds with reported subcellular localization site in the endoplasmic reticulum and Golgi apparatus.** References information is available in Supplemental Table 10. Structure is presented as the *Simplified Molecular Input Line Entry Specification string of the major microspecies at pH 7.4, as calculated by ChemAxon.*

|             |                                                                                                  |
|-------------|--------------------------------------------------------------------------------------------------|
| Name:       | B7450; Brefeldin A                                                                               |
| Method:     | Fluorescence Microscopy                                                                          |
| References: | 54, 593                                                                                          |
| Structure:  | <chem>CC1CCC\C=C/C2CC(O)CC2C(O)\C=C/C(=O)O1</chem>                                               |
| Name:       | D272; 3,3'-dipentylloxacarboyanine iodideDiOC5(3)                                                |
| Method:     | Fluorescence Microscopy                                                                          |
| References: | 28                                                                                               |
| Structure:  | <chem>CCCCCN1\C(Oc2ccccc12)=C\C=C\c1oc2ccccc2[n+]1CCCCC</chem>                                   |
| Name:       | B7447; Brefeldin A, BODIPY® FL conjugate; gBFA I                                                 |
| Method:     | Fluorescence Microscopy                                                                          |
| References: | 54                                                                                               |
| Structure:  | <chem>CC1CCC\C=C\C2CC(O)CC2C(OC(=O)CCC2=[N+]3C(C=C2)=Cc2c(C)cc(C)n2[B-]3(F)F)\C=C\C(=O)O1</chem> |
| Name:       | N1154; 6-((N-(7-nitrobenz-2-oxa-1,3-diazol-4-yl)amino)hexanoyl)sphingosine; NBD C6-ceramide      |
| Method:     | Fluorescence Microscopy                                                                          |
| References: | 146                                                                                              |

|             |                                                                                                                   |
|-------------|-------------------------------------------------------------------------------------------------------------------|
| Structure:  | <chem>CCCCCCCCCCCC\C=C\C(O)C(CO)NC(=O)CCCCNc1ccc(c2nonc12)N(=O)=O</chem>                                          |
| Name:       | E12353; ER-Tracker™ Blue-White DPX                                                                                |
| Method:     | Fluorescence Microscopy                                                                                           |
| References: | 586                                                                                                               |
| Structure:  | <chem>CN(C)c1ccc(cc1)-c1nc(o1)-c1ccc(cc1)S(=O)(=O)NCCNC(=O)c1c(F)c(F)c(F)c(F)c1F</chem>                           |
| Name:       | D3521; N-(4,4-difluoro-5,7-dimethyl-4-bora-3a,4a-diaza-s-indacene-3-pentanoyl)sphingosine; BODIPY® FL C5-ceramide |
| Method:     | Fluorescence Microscopy                                                                                           |
| References: | 131                                                                                                               |
| Structure:  | <chem>CCCCCCCCCCCC\C=C\C(O)C(CO)NC(=O)CCCC1=[N+]2C(C=C1)=Cc1c(C)cc(C)n1[B-]2(F)F</chem>                           |
| Name:       | B7449; Brefeldin A, BODIPY® 558/568 conjugate; rBFA                                                               |
| Method:     | Fluorescence Microscopy                                                                                           |
| References: | 54                                                                                                                |
| Structure:  | <chem>CC1CCC\C=C\C2CC(O)CC2C(OC(=O)CCC2=[N+]3C(C=C2)=Cc2ccc(-c4cccs4)n2[B-</chem>                                 |



|             |                                                                                                                                                                  |
|-------------|------------------------------------------------------------------------------------------------------------------------------------------------------------------|
|             | <chem>[3(F)F]\C=C\C(=O)O1</chem>                                                                                                                                 |
| Name:       | D7540; N-((4-(4,4-difluoro-5-(2-thienyl)-4-bora-3a,4a-diaza-s-indacene-3-yl)phenoxy)acetyl)sphingosine; BODIPY® TR ceramide                                      |
| Method:     | Fluorescence Microscopy                                                                                                                                          |
| References: | 719                                                                                                                                                              |
| Structure:  | <chem>CCCCCCCCCCCC\C=C/C(O)C(CO)NC(=O)COc1ccc(cc1)-c1ccc2C=C3C=CC(c4cccs4)=[N+]3[B-](F)(F)n12</chem>                                                             |
| Name:       | D3522; N-(4,4-difluoro-5,7-dimethyl-4-bora-3a,4a-diaza-s-indacene-3-pentanoyl)sphingosyl phosphocholine ; BODIPY® FL C5-sphingomyelin                            |
| Method:     | Fluorescence Microscopy                                                                                                                                          |
| References: | 588                                                                                                                                                              |
| Structure:  | <chem>CCCCCCCCCCCC\C=C/C(O)C(COP([O-])(=O)OCC[N+](C)(C)C)NC(=O)CCCC1=[N+]2C(C=C1)=Cc1c(C)cc(C)n1[B-]2(F)F</chem>                                                 |
| Name:       | E34251; ER-Tracker™ Green; BODIPY® FL glibenclamide                                                                                                              |
| Method:     | NA                                                                                                                                                               |
| References: | Invi                                                                                                                                                             |
| Structure:  | <chem>COc1c(NC(=O)CCC2=[N+]3C(C=C2)=Cc2c(C)cc(C)n2[B-]3(F)F)cc(Cl)cc1C(=O)NCCc1ccc(cc1)S([O-])(=O)=NC(=O)NC1CCCCC1</chem>                                        |
| Name:       | D7519; N-(4,4-difluoro-5,7-dimethyl-4-bora-3a,4a-diaza-s-indacene-3-dodecanoyl)sphingosyl 1-beta-D-galactopyranoside; BODIPY® FL C12-galactocerebroside          |
| Method:     | Fluorescence Microscopy                                                                                                                                          |
| References: | 661                                                                                                                                                              |
| Structure:  | <chem>CCCCCCCCCCCC\C=C\C(O)C(COC1OC(CO)C(O)C(O)C1O)NC(=O)CCCCCCCCCCCC1=[N+]2C(C=C1)=Cc1c(C)cc(C)n1[B-]2(F)F</chem>                                               |
| Name:       | E34250; ER-Tracker™ Red; BODIPY® TR glibenclamide                                                                                                                |
| Method:     | Fluorescence Microscopy                                                                                                                                          |
| References: | 644                                                                                                                                                              |
| Structure:  | <chem>COc1c(NC(=O)COc2ccc(cc2)C2=[N+]3C(C=C2)=Cc2ccc(-c4cccs4)n2[B-]3(F)F)cc(Cl)cc1C(=O)NCCc1ccc(cc1)S([O-])(=O)=NC(=O)NC1CCCCC1</chem>                          |
| Name:       | TDEPC; Tetradiethanolamine Zn(II) phthalocyanine                                                                                                                 |
| Method:     | Fluorescence Microscopy                                                                                                                                          |
| References: | 87                                                                                                                                                               |
| Structure:  | <chem>OCCN(CCO)S(=O)(=O)c1ccc2c3nc(nc4n5[Zn]n6c(nc7nc(nc5c5cc(ccc45)S(=O)(=O)N(CCO)CO)c4cccc(c74)S(=O)(=O)N(CCO)CCO)c4ccc(cc4c6n3)S(=O)(=O)N(CCO)CCO)c2c1</chem> |

|             |                                                                                                                                       |
|-------------|---------------------------------------------------------------------------------------------------------------------------------------|
| Name:       | Tolyporphin                                                                                                                           |
| Method:     | Fluorescence Microscopy                                                                                                               |
| References: | 117                                                                                                                                   |
| Structure:  | <chem>CC1CC(OC(C)=O)C(OC(C)=O)C(O1)C1(C)C(=O)c2cc3cc(C)c(cc4nc(cc5[nH]c(cc5C)cc1n2)C(=O)C4(C)C1OC(C)C(CC1OC(C)=O)OC(C)=O)[nH]3</chem> |
| Name:       | KRN5500                                                                                                                               |
| Method:     | Fluorescence Microscopy                                                                                                               |
| References: | 120                                                                                                                                   |
| Structure:  | <chem>CCCCCCCC\C=C\C=C\C(=O)NCC(=O)NC1C(O)C(O)C(Nc2ncnc3nc[nH]c23)OC1C(O)CO</chem>                                                    |
| Name:       | gBFA II                                                                                                                               |
| Method:     | Fluorescence Microscopy                                                                                                               |
| References: | 54                                                                                                                                    |
| Structure:  | <chem>CC1CCC\C=C\C2CC(CC2C(O)\C=C\C(=O)O1)OC(O)CCC1CCC2CC3(C)CC(C)N3[B-](F)(F)[NH+]12</chem>                                          |
| Name:       | 13-Oxo-methyl Pyropheophorbide-a Derivative 10                                                                                        |
| Method:     | Fluorescence Microscopy                                                                                                               |
| References: | 218                                                                                                                                   |
| Structure:  | <chem>CCCCCCCCCCCCOC(C)c1c(C)c2cc3nc(C(C(=O)OC)C3C)c3C(=O)C(=O)c4c(C)c(cc5nc(c1[nH]2)C(C)C5CC)[nH]c34</chem>                          |
| Name:       | 13-Oxo-methyl Pyropheophorbide-a Derivative 14                                                                                        |
| Method:     | Fluorescence Microscopy                                                                                                               |
| References: | 218                                                                                                                                   |
| Structure:  | <chem>CCCCCCCCCCCCOC(C)C1=C(C)C2\C=C3/N=C(C(CCC(=O)OC)C3C)C3=C4N5[In](Cl)N2C1\C=C1/N=C(/C=C5/C(C)=C4C(=O)C3=O)C(CC)C1C</chem>         |
| Name:       | CIBC Derivative 1                                                                                                                     |
| Method:     | Fluorescence Microscopy                                                                                                               |
| References: | 227                                                                                                                                   |
| Structure:  | <chem>CCC1C(C)c2cc3[nH]c(cc4nc(C(CCC([O-])=O)C4C)c4C(=O)OC(=O)c5c(C)c(cc1n2)[nH]c45)c(C)c3C(C)=O</chem>                               |
| Name:       | CIBC Derivative 5                                                                                                                     |
| Method:     | Fluorescence Microscopy                                                                                                               |
| References: | 227                                                                                                                                   |
| Structure:  | <chem>CCC1C(C)c2cc3[nH]c(cc4nc(C(CCC([O-])=O)C4C)c4C(=O)N(OC)C(=O)c5c(C)c(cc1n2)[nH]c45)c(C)c3C(C)OCC(O)CO</chem>                     |
| Name:       | CIBC Derivative 10                                                                                                                    |
| Method:     | Fluorescence Microscopy                                                                                                               |
| References: | 227                                                                                                                                   |
| Structure:  | <chem>CCC1C(C)c2cc3[nH]c(cc4nc(C(CCC([O-])=O)C4C)c4C(=O)N(NC(=O)c5ccncc5)C(=O)c5c(C)c(cc1n2)[nH]c45)c(C)c3C(C)=O</chem>               |
| Name:       | 2-BA-2-DMHB2-butylamino-2-demethoxy-                                                                                                  |



|             |                                                                                                                     |
|-------------|---------------------------------------------------------------------------------------------------------------------|
|             | <chem>OC(=O)c1cccc1C1=C2C=C(Cl)C(=O)C(CN(Cc3ccccc3)Cc3ccccc3)=C2Oc2c(CN(Cc3ccccc3)Cc3ccccc3)c([O-])c(Cl)cc12</chem> |
| Name:       | Zinpyr-2                                                                                                            |
| Method:     | Fluorescence Microscopy                                                                                             |
| References: | 458, 706                                                                                                            |

|            |                                                                                                            |
|------------|------------------------------------------------------------------------------------------------------------|
| Structure: | <chem>Oc1ccc2c(OC3=C(CN(Cc4ccccc4)Cc4ccccc4)C(=O)C=CC3=C2c2ccccc2C([O-])=O)c1CN(Cc1ccccc1)Cc1ccccc1</chem> |
|------------|------------------------------------------------------------------------------------------------------------|

**Supplemental Table 6: The chemical compounds with reported subcellular localization site in the cytosol.** References information is available in Supplemental Table 10. Structure is presented as the *Simplified Molecular Input Line Entry Specification string of the major microspecies at pH 7.4, as calculated by ChemAxon.*

|             |                                                                                                |
|-------------|------------------------------------------------------------------------------------------------|
| Name:       | Gentamicin                                                                                     |
| Method:     | Cell Fractionation                                                                             |
| References: | 2, 23, 161                                                                                     |
| Structure:  | <chem>C[NH2+]C(C)C1CCC([NH3+])C(O1)OC1C([NH3+])CC([NH3+])C(OC2OCC(C)(O)C([NH2+])C2O)C1O</chem> |
| Name:       | L7525; LysoTracker® Blue DND-22                                                                |
| Method:     | Fluorescence Microscopy                                                                        |
| References: | 585                                                                                            |
| Structure:  | <chem>CN(C)CC[NH2+]Cc1c2ccccc2c(C[NH2+])CCN(C)C)c2ccccc12</chem>                               |
| Name:       | B153; 4,4'-dianilino-1,1'-binaphthyl-5,5'-disulfonic acid, dipotassium salt; Bis-ANS           |
| Method:     | Uptake/Binding                                                                                 |
| References: | 609                                                                                            |
| Structure:  | <chem>[O-]S(=O)(=O)c1ccc2c(ccc(Nc3ccccc3)c12)-c1ccc(Nc2ccccc2)c2c(cccc12)S([O-])(=O)=O</chem>  |
| Name:       | PBD Derivative 5; 7-Diethylaminocoumarin pyrrolobenzodiazepine derivative 5                    |
| Method:     | Fluorescence Microscopy                                                                        |
| References: | 136                                                                                            |
| Structure:  | <chem>CCOC(=O)C1=Cc2ccc(cc2OC1=O)N(CC)CC</chem>                                                |

|             |                                                                                        |
|-------------|----------------------------------------------------------------------------------------|
| Name:       | PBD Derivative 17; 7-Diethylaminocoumarin pyrrolobenzodiazepine derivative 17          |
| Method:     | Fluorescence Microscopy                                                                |
| References: | 136                                                                                    |
| Structure:  | <chem>CCN(CC)c1ccc2C=C(C(=O)NCCCCCCCCO)c3cc4N=CC5CCCN5C(=O)c4cc3OC)C(=O)Oc2c1</chem>   |
| Name:       | PBD Derivative 20; 7-Diethylaminocoumarin pyrrolobenzodiazepine derivative 20          |
| Method:     | Fluorescence Microscopy                                                                |
| References: | 136                                                                                    |
| Structure:  | <chem>CCN(CC)c1ccc2C=C(C(=O)NCCCNC(=O)CO)c3cc4N=CC5CCCN5C(=O)c4cc3OC)C(=O)Oc2c1</chem> |
| Name:       | 6-Aminoquinoline Derivative 1                                                          |
| Method:     | Fluorescence Microscopy                                                                |
| References: | 137                                                                                    |
| Structure:  | <chem>Cc1c(N2CCCC2)c(N)cc2C(=O)C(=CN(C3CC3)c12)C([O-])=O</chem>                        |
| Name:       | Triflupromazine                                                                        |
| Method:     | Fluorescence Microscopy                                                                |

|             |                                                                                                                                  |
|-------------|----------------------------------------------------------------------------------------------------------------------------------|
| References: | 172                                                                                                                              |
| Structure:  | <chem>C[NH+](C)CCCN1c2ccccc2Sc2ccc(cc12)C(F)F</chem>                                                                             |
| Name:       | PCI-2000                                                                                                                         |
| Method:     | Fluorescence Microscopy                                                                                                          |
| References: | 219                                                                                                                              |
| Structure:  | <chem>CCC1=C(CC)C2=CC3=NC(=Cc4[nH]c(c(CC)c4CC)-c4[nH]c(C=C5N=C(C=C1N2)C(CCCO)=C5C)c(CC)c4CC)C(C)=C3CCCO</chem>                   |
| Name:       | (Dmt <sup>1</sup> ,dnsDap <sup>4</sup> )-DALDA; Dmt-D-Arg-Phe-dnsDap-NH <sub>2</sub>                                             |
| Method:     | Fluorescence Microscopy                                                                                                          |
| References: | 156                                                                                                                              |
| Structure:  | <chem>CN(C)c1cccc2c(cccc12)S(=O)(=O)C(N)C(NC(=O)C(Cc1cccc1)NC(=O)C(CCCNC(N)=[NH2+])NC(=O)C([NH3+])Cc1c(C)cc(O)cc1C)C(N)=O</chem> |
| Name:       | Aclacinomycin A                                                                                                                  |
| Method:     | Fluorescence Microscopy                                                                                                          |
| References: | 282                                                                                                                              |
| Structure:  | <chem>CCC1(O)CC(OC2CC(C(OC3CC(O)C(OC4CC(C(=O)C(C)O4)C(C)O3)C(C)O2)[NH+](C)C)c2c(O)c3C(=O)c4c(O)cccc4C(=O)c3cc2C1C(=O)OC</chem>   |
| Name:       | Rose Bengal Acetate                                                                                                              |
| Method:     | Fluorescence Microscopy                                                                                                          |
| References: | 298                                                                                                                              |
| Structure:  | <chem>[O-]c1c(I)cc2c(Oc3c(I)c([O-])c(I)cc3C22OC(=O)c3c(Cl)c(Cl)c(Cl)c(Cl)c23)c1I</chem>                                          |
| Name:       | P-H; tri-cationic 5-(4-carboxyphenyl)-10,15,20-tris(4-methylpyridinium-4-yl)porphyrin tri-iodide                                 |
| Method:     | Fluorescence Microscopy                                                                                                          |
| References: | 301                                                                                                                              |
| Structure:  | <chem>C[n+]1ccc(cc1)-c1c2ccc(n2)c(C([O-])=O)c2ccc([nH]2)c(-c2cc[n+](C)cc2)c2ccc([nH]2)c(-c2cc[n+](C)cc2)c2ccc1n2</chem>          |
| Name:       | Photolabeled BBR 3422                                                                                                            |
| Method:     | Cell Fractionation                                                                                                               |
| References: | 312                                                                                                                              |
| Structure:  | <chem>C[NH2+](C)CCNc1ccc2n(CCNC(=O)c3ccc(cc3O)N=[N+]=[N-])nc3-c4cnccc4C(=O)c1c23</chem>                                          |
| Name:       | 4-DCB; 4,4'-dichlorobiphenyl                                                                                                     |
| Method:     | Cell Fractionation                                                                                                               |
| References: | 312                                                                                                                              |
| Structure:  | <chem>Clc1ccc(cc1)-c1ccc(Cl)cc1</chem>                                                                                           |

|             |                                                                                                                                                    |
|-------------|----------------------------------------------------------------------------------------------------------------------------------------------------|
| Name:       | 236-HCB; 2,2',3,3',6,6'-Hexachlorobiphenyl                                                                                                         |
| Method:     | Cell Fractionation                                                                                                                                 |
| References: | 312                                                                                                                                                |
| Structure:  | <chem>Clc1ccc(Cl)c(c1Cl)-c1c(Cl)ccc(Cl)c1Cl</chem>                                                                                                 |
| Name:       | 245-HCB; 2,2',4,4',5,5'-hexachlorobiphenyl                                                                                                         |
| Method:     | Cell Fractionation                                                                                                                                 |
| References: | 312                                                                                                                                                |
| Structure:  | <chem>Cc1cc(Cl)c(Cl)cc1-c1cc(Cl)c(Cl)cc1Cl</chem>                                                                                                  |
| Name:       | 2-Chloroaniline                                                                                                                                    |
| Method:     | Cell Fractionation                                                                                                                                 |
| References: | 315                                                                                                                                                |
| Structure:  | <chem>Nc1cccc1Cl</chem>                                                                                                                            |
| Name:       | 4-Chloroaniline                                                                                                                                    |
| Method:     | Cell Fractionation                                                                                                                                 |
| References: | 315                                                                                                                                                |
| Structure:  | <chem>Nc1ccc(Cl)cc1</chem>                                                                                                                         |
| Name:       | Dioxane                                                                                                                                            |
| Method:     | Cell Fractionation                                                                                                                                 |
| References: | 317                                                                                                                                                |
| Structure:  | <chem>C1COCCO1</chem>                                                                                                                              |
| Name:       | ZnPcS3C2                                                                                                                                           |
| Method:     | Fluorescence Microscopy                                                                                                                            |
| References: | 328                                                                                                                                                |
| Structure:  | <chem>[O-]S(=O)(=O)c1ccc2c3nc(nc4n5[Zn]n6c(nc7nc(nc5c5cc(ccc45)S([O-])(=O)=O)c4ccc(cc74)S([O-])(=O)=O)c4ccc(cc4c6n3)C#C)c2c1</chem>                |
| Name:       | ZnPcS3C12                                                                                                                                          |
| Method:     | Fluorescence Microscopy                                                                                                                            |
| References: | 328                                                                                                                                                |
| Structure:  | <chem>CCCCCCCCCCCC#Cc1ccc2c3nc4nc(nc5n6[Zn]n3c(nc3nc(nc6c6ccc(cc56)S([O-])(=O)=O)c5cc(ccc35)S([O-])(=O)=O)c2c1)c1ccc(cc41)S([O-])(=O)=O</chem>     |
| Name:       | ZnPcS3C16                                                                                                                                          |
| Method:     | Fluorescence Microscopy                                                                                                                            |
| References: | 328                                                                                                                                                |
| Structure:  | <chem>CCCCCCCCCCCCCCCC#Cc1ccc2c3nc4nc(nc5n6[Zn]n3c(nc3nc(nc6c6ccc(cc56)S([O-])(=O)=O)c5cc(ccc35)S([O-])(=O)=O)c2c1)c1ccc(cc41)S([O-])(=O)=O</chem> |
| Name:       | Dansyl-TPA                                                                                                                                         |
| Method:     | Fluorescence Microscopy                                                                                                                            |
| References: | 330                                                                                                                                                |
| Structure:  | <chem>CC1C(OC(=O)CCCCCCCCCCCCNS(=O)(=O)c2cccc3c(ccc23)N(C)C)C2(OC(C)=O)C(C3C=C(CO)CC4(O)C(C=C(C)C4=O)C13O)C2(C)C</chem>                            |
| Name:       | Ergocalciferol; Vitamin D <sub>2</sub>                                                                                                             |
| Method:     | Cell Fractionation                                                                                                                                 |
| References: | 343                                                                                                                                                |
| Structure:  | <chem>CC(C)C(C)\C=C\C(C)C1CCC2C1(C)CCC\C2=</chem>                                                                                                  |

|                                 |                                                                                                                                                                                       |
|---------------------------------|---------------------------------------------------------------------------------------------------------------------------------------------------------------------------------------|
| <chem>C/C=C1\CC(O)CCC1=C</chem> |                                                                                                                                                                                       |
| Name:                           | Cholecalciferol; Vitamin D3                                                                                                                                                           |
| Method:                         | Cell Fractionation                                                                                                                                                                    |
| References:                     | 343                                                                                                                                                                                   |
| Structure:                      | <chem>CC(C)CCCC(C)C1CCC2C1(C)CCC\C2=C/C=C1\CC(O)CCC1=C</chem>                                                                                                                         |
|                                 |                                                                                                                                                                                       |
| Name:                           | Oxyethylene-rich Zn(II)-Phthalocyanine Derivative 4                                                                                                                                   |
| Method:                         | Fluorescence Microscopy                                                                                                                                                               |
| References:                     | 382                                                                                                                                                                                   |
| Structure:                      | <chem>COCCOCCOCCOCc1cc(COc2cccc3c4nc5nc(nc6n7[Zn]n4c(nc4nc(nc7c7cccc67)c6cccc46)c23)c2cccc52)cc(OCCOCCOCCOC)c1OCCOCCOCCOC</chem>                                                      |
|                                 |                                                                                                                                                                                       |
| Name:                           | Oxyethylene-rich Zn(II)-Phthalocyanine Derivative 5                                                                                                                                   |
| Method:                         | Fluorescence Microscopy                                                                                                                                                               |
| References:                     | 382                                                                                                                                                                                   |
| Structure:                      | <chem>COCCOCCOCCOCc1cc(COc2ccc3c4nc5nc(nc6n7[Zn]n4c(nc4nc(nc7c7cccc67)c6cccc46)c3c2)c2cccc52)cc(OCCOCCOCCOC)c1OCCOCCOCCOC</chem>                                                      |
|                                 |                                                                                                                                                                                       |
| Name:                           | Oxyethylene-rich Zn(II)-Phthalocyanine Derivative 8                                                                                                                                   |
| Method:                         | Fluorescence Microscopy                                                                                                                                                               |
| References:                     | 382                                                                                                                                                                                   |
| Structure:                      | <chem>COCCOCCOCCOCc1cc(COc2ccc(OCc3cc(OCCOCCOCCOC)c(OCCOCCOCCOC)c(OCCOCCOCCOC)c3)c3c4nc5nc(nc6n7[Zn]n4c(nc4nc(nc7c7cccc67)c6cccc46)c23)c2cccc52)cc(OCCOCCOCCOC)c1OCCOCCOCCOC</chem>   |
|                                 |                                                                                                                                                                                       |
| Name:                           | DCHQ Derivative 1                                                                                                                                                                     |
| Method:                         | Fluorescence Microscopy                                                                                                                                                               |
| References:                     | 452                                                                                                                                                                                   |
| Structure:                      | <chem>Oc1c(CN2CCOCCOCCN(CCOCCOCC2)Cc2ccc3ccnc3c2O)ccc2ccnc12</chem>                                                                                                                   |
|                                 |                                                                                                                                                                                       |
| Name:                           | Porphyrazine A4 Derivative 5                                                                                                                                                          |
| Method:                         | Fluorescence Microscopy                                                                                                                                                               |
| References:                     | 410                                                                                                                                                                                   |
| Structure:                      | <chem>COCCOCCOCCOCCSc1c(SCCOCCOCCOCCOC)c2nc1nc1[nH]c(nc3nc(nc4[nH]c(n2)c(SCCOCCOCCOCCOC)c4SCCOCCOCCOCCOC)c(SCCOCCOCCOCCOC)c3SCCOCCOCCOCCOC)c(SCCOCCOCCOCCOC)c1SCCOCCOCCOCCOC</chem>   |
|                                 |                                                                                                                                                                                       |
| Name:                           | Porphyrazine A4 Derivative 8                                                                                                                                                          |
| Method:                         | Fluorescence Microscopy                                                                                                                                                               |
| References:                     | 410                                                                                                                                                                                   |
| Structure:                      | <chem>COCCOCCOCCOCCSc1c(SCCOCCOCCOCCOC)c2nc1nc1c(SCCOCCOCCOCCOC)c(SCCOCCOCCOCCOC)c3nc4nc(nc5c(SCCOCCOCCOCCOC)c(SCCOCCOCCOCCOC)c(n2)n5[Zn]n13)c(SCCOCCOCCOCCOC)c4SCCOCCOCCOCCOC</chem> |

|             |                                                                                                                                                                               |
|-------------|-------------------------------------------------------------------------------------------------------------------------------------------------------------------------------|
| Name:       | Porphyrazine A3B Derivative 6                                                                                                                                                 |
| Method:     | Fluorescence Microscopy                                                                                                                                                       |
| References: | 410                                                                                                                                                                           |
| Structure:  | <chem>COCCOCCOCCOCCSc1c(SCCOCCOCCOCCOC)c2nc1nc1[nH]c(nc3nc(nc4[nH]c(n2)c2c(OC(C)C)ccc(OC(C)C)c42)c(SCCOCCOCCOCCOC)c3SCCOCCOCCOCCOC)c(SCCOCCOCCOCCOC)c1SCCOCCOCCOCCOC</chem>   |
|             |                                                                                                                                                                               |
| Name:       | Porphyrazine A3B Derivative 9                                                                                                                                                 |
| Method:     | Fluorescence Microscopy                                                                                                                                                       |
| References: | 410                                                                                                                                                                           |
| Structure:  | <chem>COCCOCCOCCOCCSc1c(SCCOCCOCCOCCOC)c2nc1nc1c(SCCOCCOCCOCCOC)c(SCCOCCOCCOCCOC)c3nc4nc(nc5n([Zn]n13)c(n2)c1c(OC(C)C)ccc(OC(C)C)c51)c(SCCOCCOCCOCCOC)c4SCCOCCOCCOCCOC</chem> |
|             |                                                                                                                                                                               |
| Name:       | Porphyrazine A2B2 Derivative 7                                                                                                                                                |
| Method:     | Fluorescence Microscopy                                                                                                                                                       |
| References: | 410                                                                                                                                                                           |
| Structure:  | <chem>COCCOCCOCCOCCSc1c(SCCOCCOCCOCCOC)c2nc1nc1[nH]c(nc3nc(nc4[nH]c(n2)c2c(OC(C)C)ccc(OC(C)C)c42)c(SCCOCCOCCOCCOC)c3SCCOCCOCCOCCOC)c2c(OC(C)C)ccc(OC(C)C)c12</chem>           |
|             |                                                                                                                                                                               |
| Name:       | Porphyrazine A2B2 Derivative 10                                                                                                                                               |
| Method:     | Fluorescence Microscopy                                                                                                                                                       |
| References: | 410                                                                                                                                                                           |
| Structure:  | <chem>COCCOCCOCCOCCSc1c(SCCOCCOCCOCCOC)c2nc1nc1n3[Zn]n4c(n2)c2c(OC(C)C)ccc(OC(C)C)c2c4nc2nc(nc3c3c(OC(C)C)ccc(OC(C)C)c13)c(SCCOCCOCCOCCOC)c2SCCOCCOCCOCCOC</chem>             |
|             |                                                                                                                                                                               |
| Name:       | Pentaphyrin Derivative 1; isopentaphyrin                                                                                                                                      |
| Method:     | Fluorescence Microscopy                                                                                                                                                       |
| References: | 399                                                                                                                                                                           |
| Structure:  | <chem>CCC1=C(C)\C2=C\C3=N\C(\C=C3)=C(c3cccc3)c3ccc(\C=C4[NH2+])C(=C/c5[nH]c(/C=C/1[NH2+])2)c(CC)c5CC)\C(CC)=C/4C)[nH]3</chem>                                                 |
|             |                                                                                                                                                                               |
| Name:       | Pentaphyrin Derivative 2; pentaphyrin                                                                                                                                         |
| Method:     | Fluorescence Microscopy                                                                                                                                                       |
| References: | 399                                                                                                                                                                           |
| Structure:  | <chem>CCC1=C(C)C2=N\C1=Cc1[nH]c(\C=C3/N=C(C=C4C=CC(=N4)C)c4cccc4)=C4NC(C=C4)=C2)C(C)=C/3CC)c(CC)c1CC</chem>                                                                   |
|             |                                                                                                                                                                               |
| Name:       | TPP(p-Deg-OH)3                                                                                                                                                                |
| Method:     | Fluorescence Microscopy                                                                                                                                                       |
| References: | 409                                                                                                                                                                           |
| Structure:  | <chem>OCCOCCOc1ccc(cc1)-c1c2ccc(n2)c(-c2ccc(OCCOCCO)cc2)c2ccc([nH]2)c(-c2ccc(OCCOCCO)cc2)c2ccc(n2)c(-c2cccc2)c2ccc1[nH]2</chem>                                               |
|             |                                                                                                                                                                               |
| Name:       | TPP(p-Deg-O-β-GalOH)3                                                                                                                                                         |

|             |                                                                                                                                                                                                                                                                    |
|-------------|--------------------------------------------------------------------------------------------------------------------------------------------------------------------------------------------------------------------------------------------------------------------|
| Method:     | Fluorescence Microscopy                                                                                                                                                                                                                                            |
| References: | 409                                                                                                                                                                                                                                                                |
| Structure:  | <chem>OC[C@@H]1O[C@@H](OCCOCCO)c2ccc(cc2)-c2c3ccc(n3)c(-c3cccc3)c3ccc([nH]3)c(-c3ccc(OCCOCCO[C@@H]4O[C@@H](CO)[C@@H](O)[C@H](O)[C@@H]4O)cc3)c3ccc(n3)c(-c3ccc(OCCOCCO[C@@H]4O[C@@H](CO)[C@@H](O)[C@H](O)[C@@H]4O)cc3)c3ccc2[nH]3][C@@H](O)[C@@H](O)[C@@H]1O</chem> |
| Name:       | m-1c                                                                                                                                                                                                                                                               |
| Method:     | Fluorescence Microscopy                                                                                                                                                                                                                                            |
| References: | 422                                                                                                                                                                                                                                                                |
| Structure:  | <chem>O[C@@H]1CO[C@@H](O)c2cccc(c2)-c2c3CCc([nH]3)c(-c3ccc(O[C@@H]4OC[C@@H](O)[C@H](O)[C@H]4O)c3)c3ccc(n3)c(-c3ccc(O[C@@H]4OC[C@@H](O)[C@H](O)[C@H]4O)c3)c3ccc([nH]3)c(-c3ccc(O[C@@H]4OC[C@@H](O)[C@H](O)[C@H]4O)c3)c3ccc2n3][C@H](O)[C@H]1O</chem>                |
| Name:       | Iejimalide Derivative 7b                                                                                                                                                                                                                                           |
| Method:     | Fluorescence Microscopy                                                                                                                                                                                                                                            |
| References: | 423                                                                                                                                                                                                                                                                |
| Structure:  | <chem>CCN(CC)c1ccc2C=C(NC(=O)OCC(NC=O)C(=O)NC\C(C)=C\C=C(/C)C3OC(=O)\C(C)=C\C(C)=C\C(C)=C\C(C)=C\C(C)=C/CCC(OC)\C=C\C=C\C3C)OC)C(=O)O)c2c1</chem>                                                                                                                  |
| Name:       | Ruthenium-Porphyrin Derivative 2                                                                                                                                                                                                                                   |
| Method:     | Fluorescence Microscopy                                                                                                                                                                                                                                            |
| References: | 425                                                                                                                                                                                                                                                                |
| Structure:  | <chem>Cl[Ru](Cl)(N1CC=C(C=C1)c1c2ccc(n2)c(C2=CCN(C=C2)[Ru](Cl)(Cl)c2ccc(cc2)-c2cccc2)c2ccc([nH]2)c(C2=CCN(C=C2)[Ru](Cl)(Cl)c2ccc(cc2)-c2cccc2)c2ccc(n2)c(C2=CCN(C=C2)[Ru](Cl)(Cl)c2ccc(cc2)-c2cccc2)c2ccc1[nH]2)c1ccc(cc1)-c1cccc1</chem>                          |
| Name:       | SIM01                                                                                                                                                                                                                                                              |
| Method:     | Fluorescence Microscopy                                                                                                                                                                                                                                            |
| References: | 426                                                                                                                                                                                                                                                                |
| Structure:  | <chem>Oc1cc(O)cc(c1)-c1c2CCc(cc3ccc([nH]3)c(-c3cc(O)cc(O)c3)c3ccc(cc4ccc1[nH]4)n3)n2</chem>                                                                                                                                                                        |
| Name:       | Glycosylated Zn(II) Phthalocyanine Derivative 9                                                                                                                                                                                                                    |
| Method:     | Fluorescence Microscopy                                                                                                                                                                                                                                            |
| References: | 536                                                                                                                                                                                                                                                                |
| Structure:  | <chem>CC1(C)OC2OC(COc3cccc4c5nc(N=c6n7[Zn]n8c(=Nc9nc(N=c7c7cccc67)c6cccc96)c6cccc6c8=N5)c34)C3OC(C)(C)OC3C2O1</chem>                                                                                                                                               |
| Name:       | Glycosylated Zn(II) Phthalocyanine Derivative                                                                                                                                                                                                                      |

|             |                                                                                                                                                                                |
|-------------|--------------------------------------------------------------------------------------------------------------------------------------------------------------------------------|
| 17          |                                                                                                                                                                                |
| Method:     | Fluorescence Microscopy                                                                                                                                                        |
| References: | 536                                                                                                                                                                            |
| Structure:  | <chem>CC1(C)OC2OC(COc3cccc4c5nc(N=c6n7[Zn]n8c(=Nc9nc(N=c7c7cccc67)c6cccc96)c6cccc6c8=N5)c34)C3OC(C)(C)OC3C2O1</chem>                                                           |
| Name:       | Glycosylated Zn(II) Phthalocyanine Derivative 19                                                                                                                               |
| Method:     | Fluorescence Microscopy                                                                                                                                                        |
| References: | 536                                                                                                                                                                            |
| Structure:  | <chem>CC1(C)OC2OC(COc3ccc4c5nc(N=c6n7[Zn]n8c(=Nc9nc(N=c7c7cccc67)c6cccc96)c6cccc6c8=N5)c4c3)C3OC(C)(C)OC3C2O1</chem>                                                           |
| Name:       | Mono-Substituted Amphiphilic Zn(II) Phthalocyanine Derivative 3                                                                                                                |
| Method:     | Fluorescence Microscopy                                                                                                                                                        |
| References: | 442                                                                                                                                                                            |
| Structure:  | <chem>CN(C)CC(C[NH+](C)C)Oc1ccc2c3nc4nc(nc5n6[Zn]n3c(nc3nc(nc6c6cccc56)c5cccc35)c2c1)c1cccc41</chem>                                                                           |
| Name:       | Mono-Substituted Amphiphilic Zn(II) Phthalocyanine Derivative 4                                                                                                                |
| Method:     | Fluorescence Microscopy                                                                                                                                                        |
| References: | 442                                                                                                                                                                            |
| Structure:  | <chem>CN(C)CC(C[NH+](C)C)Oc1cccc2c3nc4nc(nc5n6[Zn]n3c(nc3nc(nc6c6cccc56)c5cccc35)c12)c1cccc41</chem>                                                                           |
| Name:       | Mono-Substituted Amphiphilic Zn(II) Phthalocyanine Derivative 5                                                                                                                |
| Method:     | Fluorescence Microscopy                                                                                                                                                        |
| References: | 442                                                                                                                                                                            |
| Structure:  | <chem>C[N+](C)(C)CC(C[N+](C)(C)C)Oc1ccc2c3nc4nc(nc5n6[Zn]n3c(nc3nc(nc6c6cccc56)c5cccc35)c2c1)c1cccc41</chem>                                                                   |
| Name:       | Mono-Substituted Amphiphilic Zn(II) Phthalocyanine Derivative 6                                                                                                                |
| Method:     | Fluorescence Microscopy                                                                                                                                                        |
| References: | 442                                                                                                                                                                            |
| Structure:  | <chem>C[N+](C)(C)CC(C[N+](C)(C)C)Oc1cccc2c3nc4nc(nc5n6[Zn]n3c(nc3nc(nc6c6cccc56)c5cccc35)c12)c1cccc41</chem>                                                                   |
| Name:       | NiNc                                                                                                                                                                           |
| Method:     | Distr.others                                                                                                                                                                   |
| References: | 470                                                                                                                                                                            |
| Structure:  | <chem>CCCCOc1c2cccc2c(OCCCC)c2c3nc4[n+ ]5c(nc6n7c(nc8[n+ ]9c(nc(n3[Ni-- ]579)c12)c1c(OCCCC)c2cccc2c(OCCCC)c81)c1c(OCCCC)c2cccc2c(OCCCC)c61)c1c(OCCCC)c2cccc2c(OCCCC)c41</chem> |
| Name:       | DB607                                                                                                                                                                          |
| Method:     | Fluorescence Microscopy                                                                                                                                                        |
| References: | 472                                                                                                                                                                            |
| Structure:  | <chem>COc1ccc(cc1)-c1ccc(o1)-</chem>                                                                                                                                           |

|             |                                               |
|-------------|-----------------------------------------------|
|             | <chem>c1ccc(cc1)C(N)=[NH2+]</chem>            |
| Name:       | 4-Hydroxymethyl-3- aminoacridine Derivative 1 |
| Method:     | Fluorescence Microscopy                       |
| References: | 478                                           |
| Structure:  | <chem>Nc1ccc2cc3ccccc3nc2c1CO</chem>          |
| Name:       | 4-Hydroxymethyl-3- aminoacridine Derivative 2 |
| Method:     | Fluorescence Microscopy                       |
| References: | 478                                           |
| Structure:  | <chem>CNc1ccc2cc3ccccc3nc2c1CO</chem>         |
| Name:       | 4-Hydroxymethyl-3- aminoacridine Derivative 3 |
| Method:     | Fluorescence Microscopy                       |
| References: | 478                                           |
| Structure:  | <chem>CN(C)c1ccc2cc3ccccc3nc2c1CO</chem>      |
| Name:       | O <sup>6</sup> -Benzylguanine-Oregon Green    |
| Method:     | Fluorescence Microscopy                       |

|             |                                                                                                                                                                                                                                                                                                    |
|-------------|----------------------------------------------------------------------------------------------------------------------------------------------------------------------------------------------------------------------------------------------------------------------------------------------------|
| References: | 495                                                                                                                                                                                                                                                                                                |
| Structure:  | <chem>Nc1nc(OCc2ccc(CNC(=O)c3ccc(c(c3)C([O-])=O)C3=C4C=C(F)C(=O)C=C4Oc4cc(O)c(F)c34)cc2)c2nc[nH]c2n1</chem>                                                                                                                                                                                        |
| Name:       | Eu2(LC3)3                                                                                                                                                                                                                                                                                          |
| Method:     | Fluorescence Microscopy                                                                                                                                                                                                                                                                            |
| References: | 499                                                                                                                                                                                                                                                                                                |
| Structure:  | <chem>COCCOCCOCCn1c-2nc3cc(Cc4ccc5n(CCOCCOCCOC)c(nc5c4)-c4cccc(n4)C(=O)O[Eu]456(OC(=O)c7cccc-2n7)OC(=O)c2cccc(n2)-c2nc7cc(Cc8ccc9n(CCOCCOCCOC)c(nc9c8)-c8cccc(n8)C(=O)O4)ccc7n2COCCOCCOC)cc c13.COCCOCCOCCn1c(nc2cc(Cc3ccc4n(CCOCCOCCOC)c(nc4c3)-c3cccc(n3)C(=O)O5)ccc12)-c1cccc(n1)C(=O)O6</chem> |
| Name:       | Pi-Extended Squaraines Derivative 2a                                                                                                                                                                                                                                                               |
| Method:     | Fluorescence Microscopy                                                                                                                                                                                                                                                                            |
| References: | 507                                                                                                                                                                                                                                                                                                |
| Structure:  | <chem>COCCOCCOCCn1c(\C=C\c2ccnc2)ccc1C1=C([O-])\C(C1=O)=C1/C=CC(\C=C\c2ccnc2)=[N+]/1COCCOCCOC</chem>                                                                                                                                                                                               |

**Supplemental Table 7: The chemical compounds with multiple reported subcellular localization sites.** Localization 1: endo-lysosomes; 2: mitochondria; 3: nucleus; 4: plasma membrane; 5: endoplasmic reticulum and Golgi apparatus; and 6: cytosol. References information is available in Supplemental Table 10. Structure is presented as the Simplified Molecular Input Line Entry Specification string of the major microspecies at pH 7.4, as calculated by ChemAxon.

|               |                                                      |
|---------------|------------------------------------------------------|
| Name:         | A1301; Acridine orange                               |
| Localization: | 1, 3                                                 |
| Method:       | Fluorescence Microscopy                              |
| References:   | Invi.                                                |
| Structure:    | <chem>CN(C)c1ccc2cc3ccc(cc3[nH+]c2c1)N(C)C</chem>    |
| Name:         | Fluoxetine                                           |
| Localization: | 1,2                                                  |
| Method:       | Pharmacological Effect                               |
| References:   | 2, 4, 6                                              |
| Structure:    | <chem>C[NH2+]CCC(Oc1ccc(cc1)C(F)(F)F)c1ccccc1</chem> |
| Name:         | D23107; dihydroethidium (hydroethidine)              |
| Localization: | 2, 3                                                 |
| Method:       | Fluorescence Microscopy                              |
| References:   | 667                                                  |
| Structure:    | <chem>CCN1C(c2ccccc2)c2cc(N)ccc2-c2ccc(N)cc12</chem> |
| Name:         | N1142; Nile red                                      |

|               |                                                             |
|---------------|-------------------------------------------------------------|
| Localization: | 1, 3, 4                                                     |
| Method:       | Fluorescence Microscopy                                     |
| References:   | 122                                                         |
| Structure:    | <chem>CCN(CC)c1ccc2N=C3C(Oc2c1)=CC(=O)c1cccc31</chem>       |
| Name:         | Quinine                                                     |
| Localization: | 1, 2                                                        |
| Method:       | Fluorescence Microscopy/Cell Fractionation                  |
| References:   | 5, 127; 264                                                 |
| Structure:    | <chem>COc1ccc2nccc(C(O)C3CC4CC[NH+]3CC4C=C)c2c1</chem>      |
| Name:         | Trifluoperazine (TFP)                                       |
| Localization: | 1, 2                                                        |
| Method:       | Pharmacological Effect                                      |
| References:   | 4                                                           |
| Structure:    | <chem>CN1C=CN(CCCN2c3ccccc3Sc3ccc(cc23)C(F)(F)F)C=C1</chem> |

|               |                                                                                                                                              |
|---------------|----------------------------------------------------------------------------------------------------------------------------------------------|
| Name:         | T204; 1-(4-trimethylammoniumphenyl)-6-phenyl-1,3,5-hexatriene p-toluenesulfonate; TMA-DPH                                                    |
| Localization: | 1, 4                                                                                                                                         |
| Method:       | Fluorescence Microscopy                                                                                                                      |
| References:   | 108                                                                                                                                          |
| Structure:    | <chem>C[N+](C)(C)c1ccc(cc1)\C=C\C=C\C=C\Cc1ccc</chem>                                                                                        |
| Name:         | H7593; Hexidium iodide                                                                                                                       |
| Localization: | 3, 6                                                                                                                                         |
| Method:       | NA                                                                                                                                           |
| References:   | Invi.                                                                                                                                        |
| Structure:    | <chem>CCCCC[n+]1c(-c2ccccc2)c2cc(N)ccc2c2ccc(N)cc12</chem>                                                                                   |
| Name:         | D273; 3,3'-dihexyloxacarbocyanine iodide DiOC6(3)                                                                                            |
| Localization: | 2, 5                                                                                                                                         |
| Method:       | NA                                                                                                                                           |
| References:   | Invi.                                                                                                                                        |
| Structure:    | <chem>CCCCCN1\C(Oc2ccccc12)=C\C=C\C1oc2ccc2[n+]1CCCCC</chem>                                                                                 |
| Name:         | R648MP; rhodamine B, hexyl ester, perchlorate (R6)                                                                                           |
| Localization: | 2, 6                                                                                                                                         |
| Method:       | Fluorescence Microscopy                                                                                                                      |
| References:   | 677                                                                                                                                          |
| Structure:    | <chem>CCCCCOC(=O)c1ccccc1C1=C2C=CC(C=C2)Oc2cc(ccc12)N(CC)CC=[N+](CC)CC</chem>                                                                |
| Name:         | D13951; N-(4,4-difluoro-5,7-dimethyl-4-bora-3a,4a-diaza-s-indacene-3-pentanoyl)sphingosyl 1-beta-D-lactoside; BODIPY® FL C5-lactosylceramide |
| Localization: | 4, 5                                                                                                                                         |
| Method:       | NA                                                                                                                                           |
| References:   | Invi.                                                                                                                                        |
| Structure:    | <chem>CCCCCCCCCCCC\C=C/C(O)C(COC1OC(CO)C(OC2OC(CO)C(O)C(O)C2O)C(O)C1O)NC(=O)CCCCc1ccc2C=C3C(C)=CC(C)=[N+][3[B-](F)(F)n12</chem>              |
| Name:         | Proflavine                                                                                                                                   |
| Localization: | 1, 3                                                                                                                                         |
| Method:       | Fluorescence Microscopy                                                                                                                      |
| References:   | 127                                                                                                                                          |
| Structure:    | <chem>Nc1ccc2cc3ccc(N)cc3[nH+]c2c1</chem>                                                                                                    |
| Name:         | Euchrysin                                                                                                                                    |
| Localization: | 1, 3                                                                                                                                         |
| Method:       | Fluorescence Microscopy                                                                                                                      |
| References:   | 127                                                                                                                                          |
| Structure:    | <chem>Cc1cc2c(C)c3cc(C)c(N)cc3[nH+]c2cc1N</chem>                                                                                             |
| Name:         | Acridine orange R                                                                                                                            |
| Localization: | 1, 3                                                                                                                                         |
| Method:       | Fluorescence Microscopy                                                                                                                      |
| References:   | 127                                                                                                                                          |

|               |                                                                                                                                                                   |
|---------------|-------------------------------------------------------------------------------------------------------------------------------------------------------------------|
| Structure:    | <chem>CN(C)c1ccc2cc3cccc(N(C)C)c3nc2c1</chem>                                                                                                                     |
| Name:         | BBDX                                                                                                                                                              |
| Localization: | 2, 4                                                                                                                                                              |
| Method:       | Fluorescence Microscopy                                                                                                                                           |
| References:   | 55                                                                                                                                                                |
| Structure:    | <chem>CN(C)c1ccc2c(Oc3cc(ccc3C2(O)c2cc(C)c(N(C)C)c(C)c2)N(C)C)c1</chem>                                                                                           |
| Name:         | Promethazine                                                                                                                                                      |
| Localization: | 2, 5, 6                                                                                                                                                           |
| Method:       | histo                                                                                                                                                             |
| References:   | 66                                                                                                                                                                |
| Structure:    | <chem>CC(CN1c2ccccc2Sc2ccccc12)[NH+](C)C</chem>                                                                                                                   |
| Name:         | HDAO; 3,6-Bis(dimethylamino)-10-hexadecylacridinium bromide; acridine orange 10-hexadecyl bromide                                                                 |
| Localization: | 2, 6                                                                                                                                                              |
| Method:       | Fluorescence Microscopy                                                                                                                                           |
| References:   | 72                                                                                                                                                                |
| Structure:    | <chem>CCCCCCCCCCCCCCCC[n+]1c2cc(ccc2cc2cc(cc12)N(C)C)N(C)C</chem>                                                                                                 |
| Name:         | TPPS4; 5,10,15,20-tetra(4-sulfonatophenyl)porphine                                                                                                                |
| Localization: | 1, 3                                                                                                                                                              |
| Method:       | Fluorescence Microscopy                                                                                                                                           |
| References:   | 84                                                                                                                                                                |
| Structure:    | <chem>[O-]S(=O)(=O)c1ccc(cc1)-c1c2ccc(n2)c(-c2ccc(cc2)S([O-])(=O)=O)c2ccc([nH]2)c(-c2ccc(cc2)S([O-])(=O)=O)c2ccc([nH]2)c(-c2ccc(cc2)S([O-])(=O)=O)c2ccc1n2</chem> |
| Name:         | Merocyanine 540                                                                                                                                                   |
| Localization: | 1, 2, 4                                                                                                                                                           |
| Method:       | Fluorescence Microscopy                                                                                                                                           |
| References:   | 93                                                                                                                                                                |
| Structure:    | <chem>CCCCN1C(=O)N(CCCC)C(=O)C(=C\C=C\C=C=C2/Oc3ccccc3N2CCCS([O-])(=O)=O)C1=O</chem>                                                                              |
| Name:         | SnET2                                                                                                                                                             |
| Localization: | 1, 2                                                                                                                                                              |
| Method:       | Fluorescence Microscopy                                                                                                                                           |
| References:   | 99                                                                                                                                                                |
| Structure:    | <chem>CCOC(=O)C1=Cc2c3n4c(cc5nc(cc6c(CC)c(C)c(cc7nc2c(C)c7CC)n6[Sn]4(Cl)Cl)c(C)c5CC)C(C)C13CC</chem>                                                              |
| Name:         | Curcumin                                                                                                                                                          |
| Localization: | 3, 4                                                                                                                                                              |
| Method:       | Fluorescence Microscopy                                                                                                                                           |
| References:   | 133                                                                                                                                                               |
| Structure:    | <chem>COc1cc(ccc1O)\C=C\C(=O)CC(=O)\C=C\C1cc(O)c(OC)c1</chem>                                                                                                     |
| Name:         | Edelfosine                                                                                                                                                        |
| Localization: | 4, 5                                                                                                                                                              |
| Method:       | Fluorescence Microscopy                                                                                                                                           |
| References:   | 170                                                                                                                                                               |



|               |                                                                                                                                                                                                                        |
|---------------|------------------------------------------------------------------------------------------------------------------------------------------------------------------------------------------------------------------------|
| Structure:    | CCCCCCCCCCCCCCCCCOCC(COP([O-])(=O)OCC[N+](C)(C)C)OC                                                                                                                                                                    |
| Name:         | Toluidine Blue                                                                                                                                                                                                         |
| Localization: | 4, 5                                                                                                                                                                                                                   |
| Method:       | Fluorescence Microscopy                                                                                                                                                                                                |
| References:   | 171                                                                                                                                                                                                                    |
| Structure:    | Cc1cc2N=C3C=CC(C=C3Sc2cc1N)=[N+](C)C                                                                                                                                                                                   |
| Name:         | Levorphanol                                                                                                                                                                                                            |
| Localization: | 2, 3                                                                                                                                                                                                                   |
| Method:       | Cell Fractionation                                                                                                                                                                                                     |
| References:   | 174                                                                                                                                                                                                                    |
| Structure:    | C[NH+]1CCCC23CCCC2C1Cc1ccc(O)cc31                                                                                                                                                                                      |
| Name:         | BODIPY-labeled Polyamide 1                                                                                                                                                                                             |
| Localization: | 1, 5                                                                                                                                                                                                                   |
| Method:       | Fluorescence Microscopy                                                                                                                                                                                                |
| References:   | 176                                                                                                                                                                                                                    |
| Structure:    | C[NH+](CCCNC(=O)CCCCNC(=O)CCC1=[N+]2C(C=C1)=Cc1c(C)cc(C)n1[B-]2(F)F)CCCNC(=O)CCNC(=O)c1cc(NC(=O)c2cc(NC(=O)c3cc(NC(=O)c4cc(NC(=O)CCCNC(=O)c5cc(NC(=O)c6cc(NC(=O)c7cc(NC(=O)c8nccn8C)cn7C)cn6C)cn5C)cn4C)cn3C)cn2C)cn1C |
| Name:         | M-129                                                                                                                                                                                                                  |
| Localization: | 3, 6                                                                                                                                                                                                                   |
| Method:       | Fluorescence Microscopy                                                                                                                                                                                                |
| References:   | 173                                                                                                                                                                                                                    |
| Structure:    | CC(CN1c2ccccc2C(=O)c2ccccc12)[NH+](C)C                                                                                                                                                                                 |
| Name:         | Motexafin Gadolinium                                                                                                                                                                                                   |
| Localization: | 1, 2, 5                                                                                                                                                                                                                |
| Method:       | Fluorescence Microscopy                                                                                                                                                                                                |
| References:   | 184                                                                                                                                                                                                                    |
| Structure:    | CCO.CCC1=C(CC)/C2=C/C3=N/C(=C\N=C4\C=C(OCCOCCOCCOC)C(OCCOCCOCCOC)=C\N=C4/N=C4/N=C/C=C\N2[Gd]([O-])OC(C)=O)C(CCCO)=C/4C)/C(C)=C3CCCO                                                                                    |
| Name:         | HB; Hypocrellin B                                                                                                                                                                                                      |
| Localization: | 1, 4                                                                                                                                                                                                                   |
| Method:       | Fluorescence Microscopy                                                                                                                                                                                                |
| References:   | 186                                                                                                                                                                                                                    |
| Structure:    | COC1=CC(=O)c2c(O)c(OC)c3CC(C)=C(C(C)=O)c4c(OC)c(O)c5C(=O)C=C(OC)c6c1c2c3c4c56                                                                                                                                          |
| Name:         | HBEA-R1; Ethanolaminated HB                                                                                                                                                                                            |
| Localization: | 1, 4                                                                                                                                                                                                                   |
| Method:       | Fluorescence Microscopy                                                                                                                                                                                                |
| References:   | 186                                                                                                                                                                                                                    |
| Structure:    | COC1=CC(=O)c2c(NCCO)c(OC)c3CC(C)=C(C(C)=O)c4c(OC)c(NCCO)c5C(=O)C=C(OC)c6c1c2c3c4c56                                                                                                                                    |

|               |                                                                                                                                                                             |
|---------------|-----------------------------------------------------------------------------------------------------------------------------------------------------------------------------|
| Name:         | HBBA-R2; Butylaminated HB                                                                                                                                                   |
| Localization: | 4, 5                                                                                                                                                                        |
| Method:       | Fluorescence Microscopy                                                                                                                                                     |
| References:   | 186                                                                                                                                                                         |
| Structure:    | CCCCNc1cc(OC)c2c3c1C(=O)C(OC)=C1CC(C)=C(C(C)=O)C4=C(OC)C(=O)c5c(NCCCC)cc(OC)c2c5c4c31                                                                                       |
| Name:         | BPD-MA                                                                                                                                                                      |
| Localization: | 2, 3                                                                                                                                                                        |
| Method:       | Fluorescence Microscopy                                                                                                                                                     |
| References:   | 210                                                                                                                                                                         |
| Structure:    | CCOC(=O)C1C(=CC=C2c3cc4[nH]c(cc5nc(c6[nH]c(cc(n3)C12C)c(C=C)c6C)c(C)c5CCC([O-])=O)c(CCC([O-])=O)c4C)C(=O)OCC                                                                |
| Name:         | Guanidine Porphyrin                                                                                                                                                         |
| Localization: | 1, 2, 5                                                                                                                                                                     |
| Method:       | Fluorescence Microscopy                                                                                                                                                     |
| References:   | 211                                                                                                                                                                         |
| Structure:    | NC(N)=Nc1ccc(cc1)-c1c2ccc(n2)c(-c2ccccc2)c2ccc([nH]2)c(-c2ccccc2)c2ccc(n2)c(-c2ccccc2)c2ccc1[nH]2                                                                           |
| Name:         | Biguanidine Porphyrin                                                                                                                                                       |
| Localization: | 1, 2                                                                                                                                                                        |
| Method:       | Fluorescence Microscopy                                                                                                                                                     |
| References:   | 211                                                                                                                                                                         |
| Structure:    | N[C+](N)\N=C(/N)Nc1ccc(cc1)-c1c2ccc(n2)c(-c2ccccc2)c2ccc([nH]2)c(-c2ccccc2)c2ccc(n2)c(-c2ccccc2)c2ccc1[nH]2                                                                 |
| Name:         | Pc4                                                                                                                                                                         |
| Localization: | 2, 5                                                                                                                                                                        |
| Method:       | Fluorescence Microscopy                                                                                                                                                     |
| References:   | 214                                                                                                                                                                         |
| Structure:    | NC1=NC(=O)N(C=C1)C1OC(COP([O-])(=O)OC2C(O)C(COP([O-])(=O)OC3C(O)C(COP([O-])(=O)OC4C(O)C(COP([O-])([O-])=O)OC4N4C=CC(N)=NC4=O)OC3N3C=C(C(N)=NC3=O)OC2N2C=CC(N)=NC2=O)C(O)C1O |
| Name:         | Zn-BC-AM                                                                                                                                                                    |
| Localization: | 2, 5                                                                                                                                                                        |
| Method:       | Fluorescence Microscopy                                                                                                                                                     |
| References:   | 216                                                                                                                                                                         |
| Structure:    | CCc1c(CC)c2cc3c(CC)c(CC)c4n3[Zn]n3c(cc5nc6c(cc(cc46)[C+](N)N)C5(CC)CC)c(CC)c(C)C)c3cc1n2                                                                                    |
| Name:         | PPME                                                                                                                                                                        |
| Localization: | 1, 5, 6                                                                                                                                                                     |
| Method:       | Fluorescence Microscopy                                                                                                                                                     |
| References:   | 222                                                                                                                                                                         |
| Structure:    | CCc1c(C)c2cc3[nH]c(cc4nc(C(CCC(=O)OC)C4C)c4CC(=O)C5C(C)c(cc1n2)[nH]c45)c(C)c3C=C                                                                                            |

|               |                                                                                                                               |
|---------------|-------------------------------------------------------------------------------------------------------------------------------|
| Name:         | CIBC Derivative 3                                                                                                             |
| Localization: | 4, 5                                                                                                                          |
| Method:       | Fluorescence Microscopy                                                                                                       |
| References:   | 227                                                                                                                           |
| Structure:    | <chem>CCC1C(C)c2cc3[nH]c(cc4nc(C(CCC([O-])=O)C4C)c4C(=O)N(OC)C(=O)c5c(C)c(cc1n2)[nH]c45)c(C)c3C(C)OCCOCCO</chem>              |
| Name:         | CIBC Derivative 4                                                                                                             |
| Localization: | 4, 5                                                                                                                          |
| Method:       | Fluorescence Microscopy                                                                                                       |
| References:   | 227                                                                                                                           |
| Structure:    | <chem>CCC1C(C)c2cc3[nH]c(cc4nc(C(CCC([O-])=O)C4C)c4C(=O)N(OC)C(=O)c5c(C)c(cc1n2)[nH]c45)c(C)c3C(C)OCCOCCOCCO</chem>           |
| Name:         | CIBC Derivative 6                                                                                                             |
| Localization: | 4, 5                                                                                                                          |
| Method:       | Fluorescence Microscopy                                                                                                       |
| References:   | 227                                                                                                                           |
| Structure:    | <chem>CCC1C(C)c2cc3[nH]c(cc4nc(C(CCC([O-])=O)C4C)c4C(=O)N(OC)C(=O)c5c(C)c(cc1n2)[nH]c45)c(C)c3C(C)OCCOC</chem>                |
| Name:         | CIBC Derivative 8                                                                                                             |
| Localization: | 4, 5                                                                                                                          |
| Method:       | Fluorescence Microscopy                                                                                                       |
| References:   | 227                                                                                                                           |
| Structure:    | <chem>CCC1C(C)c2cc3[nH]c(cc4nc(C(CCC([O-])=O)C4C)c4C(=O)N(N(C)C)C(=O)c5c(C)c(cc1n2)[nH]c45)c(C)c3C(C)=O</chem>                |
| Name:         | CIBC Derivative 9                                                                                                             |
| Localization: | 4, 5                                                                                                                          |
| Method:       | Fluorescence Microscopy                                                                                                       |
| References:   | 227                                                                                                                           |
| Structure:    | <chem>CCC1C(C)c2cc3[nH]c(cc4nc(C(CCC([O-])=O)C4C)c4C(=O)N(N)C(=O)c5c(C)c(cc1n2)[nH]c45)c(C)c3C(C)=O</chem>                    |
| Name:         | CIBC Derivative 11                                                                                                            |
| Localization: | 4, 5                                                                                                                          |
| Method:       | Fluorescence Microscopy                                                                                                       |
| References:   | 227                                                                                                                           |
| Structure:    | <chem>CCC1C(C)c2cc3[nH]c(cc4nc(C(CCC([O-])=O)C4C)c4C(=O)N(NC(=O)c5cc[n+](C)cc5)C(=O)c5c(C)c(cc1n2)[nH]c45)c(C)c3C(C)=O</chem> |
| Name:         | CICD Derivative 1; 13,15-N-cycloimide Derivatives of Chlorin p6                                                               |
| Localization: | 2, 5                                                                                                                          |
| Method:       | Fluorescence Microscopy                                                                                                       |
| References:   | 86                                                                                                                            |
| Structure:    | <chem>CCc1c(C)c2cc3[nH]c(cc4nc(C(CCC([O-])=O)C4C)c4C(=O)N(CCCO)C(=O)c5c(C)c(cc1n2)[nH]c45)c(C)c3C=C</chem>                    |
| Name:         | CICD Derivative 2; 13,15-N-cycloimide Derivatives of Chlorin p7                                                               |

|               |                                                                                                               |
|---------------|---------------------------------------------------------------------------------------------------------------|
| Localization: | 2, 5                                                                                                          |
| Method:       | Fluorescence Microscopy                                                                                       |
| References:   | 86                                                                                                            |
| Structure:    | <chem>CCc1c(C)c2cc3[nH]c(cc4nc(C(CCC([O-])=O)C4C)c4C(=O)N(CCO)C(=O)c5c(C)c(cc1n2)[nH]c45)c(C)c3C=C</chem>     |
| Name:         | CICD Derivative 3; 13,15-N-cycloimide Derivatives of Chlorin p8                                               |
| Localization: | 2, 5                                                                                                          |
| Method:       | Fluorescence Microscopy                                                                                       |
| References:   | 86                                                                                                            |
| Structure:    | <chem>CCc1c(C)c2cc3[nH]c(cc4nc(C(CCC([O-])=O)C4C)c4C(=O)N(OC)C(=O)C(=O)c5c(C)c(cc1n2)[nH]c45)c(C)c3C=C</chem> |
| Name:         | CICD Derivative 4; 13,15-N-cycloimide Derivatives of Chlorin p9                                               |
| Localization: | 2, 5                                                                                                          |
| Method:       | Fluorescence Microscopy                                                                                       |
| References:   | 86                                                                                                            |
| Structure:    | <chem>CCc1c(C)c2cc3[nH]c(cc4nc(C(CCC(=O)OC)C4C)c4C(=O)N([O-])C(=O)c5c(C)c(cc1n2)[nH]c45)c(C)c3C=C</chem>      |
| Name:         | Pyropheophorbide-a Derivative 8                                                                               |
| Localization: | 1, 2                                                                                                          |
| Method:       | Fluorescence Microscopy                                                                                       |
| References:   | 92                                                                                                            |
| Structure:    | <chem>CCCCCCCCOC(C)c1c(C)c2cc3nc(C(CCC([O-])=O)C3C)c3CC(=O)c4c(C)c(cc5nc(cc1[nH]2)c(C)c5CC)[nH]c34</chem>     |
| Name:         | Pyropheophorbide-a Derivative 10                                                                              |
| Localization: | 1, 2                                                                                                          |
| Method:       | Fluorescence Microscopy                                                                                       |
| References:   | 92                                                                                                            |
| Structure:    | <chem>CCCCCCCCCCCCOC(C)c1c(C)c2cc3nc(C(CCC([O-])=O)C3C)c3CC(=O)c4c(C)c(cc5nc(cc1[nH]2)c(C)c5CC)[nH]c34</chem> |
| Name:         | Pyropheophorbide-a Derivative 12                                                                              |
| Localization: | 1, 2                                                                                                          |
| Method:       | Fluorescence Microscopy                                                                                       |
| References:   | 92                                                                                                            |
| Structure:    | <chem>CCCCCCCCCCCCOC(C)c1c(C)c2cc3nc(C(CCC([O-])=O)C3C)c3CC(=O)c4c(C)c(cc5nc(cc1[nH]2)c(C)c5CC)[nH]c34</chem> |
| Name:         | MPPa; Pyropheophorbide-a methyl ester                                                                         |
| Localization: | 1, 2, 3, 5                                                                                                    |
| Method:       | Fluorescence Microscopy                                                                                       |
| References:   | 94                                                                                                            |
| Structure:    | <chem>CCc1c(C)c2cc3[nH]c(cc4nc(C(CCC(=O)OC)C4C)c4CC(=O)c5c(C)c(cc1n2)[nH]c45)c(C)c3C=C</chem>                 |

|               |                                                                                                                                                             |
|---------------|-------------------------------------------------------------------------------------------------------------------------------------------------------------|
| Name:         | CAME (Chlorin e6 triacetoxymethyl ester)<br>(Lysosomes)                                                                                                     |
| Localization: | 1, 2                                                                                                                                                        |
| Method:       | Fluorescence Microscopy                                                                                                                                     |
| References:   | 98                                                                                                                                                          |
| Structure:    | <chem>CCc1c(C)c2cc3[nH]c(cc4nc(C(CCC(=O)OCO<br/>C(C)=O)C4C)c(CC(=O)OCOC(C)=O)c4nc(cc<br/>1[nH]2)c(C)c4C(=O)OCOC(C)=O)c(C)c3C=<br/>C</chem>                  |
| Name:         | Deuteroporphyrin                                                                                                                                            |
| Localization: | 4, 6                                                                                                                                                        |
| Method:       | Fluorescence Microscopy                                                                                                                                     |
| References:   | 125                                                                                                                                                         |
| Structure:    | <chem>Cc1cc2cc3nc(cc4[nH]c(cc5[nH]c(cc5C)cc1n2<br/>)c(C)c4CCC([O-])=O)c(CCC([O-])=O)c3C</chem>                                                              |
| Name:         | Thiamine                                                                                                                                                    |
| Localization: | 1, 3                                                                                                                                                        |
| Method:       | Fluorescence Microscopy                                                                                                                                     |
| References:   | 238                                                                                                                                                         |
| Structure:    | <chem>Cc1ncc(C[n+]2csc(CCO)c2C)c(N)n1</chem>                                                                                                                |
| Name:         | F-DDP                                                                                                                                                       |
| Localization: | 1, 5                                                                                                                                                        |
| Method:       | Fluorescence Microscopy                                                                                                                                     |
| References:   | 240                                                                                                                                                         |
| Structure:    | <chem>Oc1ccc2C(C3C=CC(=O)C=C3Oc2c1)c1ccc(c<br/>c1C([O-])=O)C(=O)NCC1C[NH2+][Pt--<br/>](Cl)(Cl)N1</chem>                                                     |
| Name:         | Grepafloxacin                                                                                                                                               |
| Localization: | 3, 4                                                                                                                                                        |
| Method:       | Fluorescence Microscopy                                                                                                                                     |
| References:   | 242                                                                                                                                                         |
| Structure:    | <chem>CC1CN(CC[NH2+])c1cc2N(C=C(C([O-<br/>])=O)C(=O)c2c(C)c1F)C1CC1</chem>                                                                                  |
| Name:         | Distamycin Analogue 10                                                                                                                                      |
| Localization: | 2, 6                                                                                                                                                        |
| Method:       | Fluorescence Microscopy                                                                                                                                     |
| References:   | 258                                                                                                                                                         |
| Structure:    | <chem>C[NH+](C)CCCNC(=O)c1cc(NC(=C)c2cc(N<br/>C(=O)c3cc(NC=O)cn3C)cn2CCNC(=O)OC2c<br/>3cccc3-c3cccc23)cn1C</chem>                                           |
| Name:         | Purpurinimide Carbohydrate Conjugate 3                                                                                                                      |
| Localization: | 1, 5                                                                                                                                                        |
| Method:       | Fluorescence Microscopy                                                                                                                                     |
| References:   | 263                                                                                                                                                         |
| Structure:    | <chem>CCCCCN1C(=O)c2c(C)c3cc4nc(cc5[nH]c(c<br/>c6nc(C(CCC(=O)OC)C6C)c(C1=O)c2[nH]3)c<br/>(C)c5C)c(COC1OC(CO)C(OC2OC(CO)C(O)<br/>C(O)C2O)C(O)C1O)c4CC</chem> |
| Name:         | Fluoromycin                                                                                                                                                 |
| Localization: | 3, 6                                                                                                                                                        |
| Method:       | Fluorescence Microscopy                                                                                                                                     |
| References:   | 279                                                                                                                                                         |
| Structure:    | <chem>CC(O)C(NC(=O)CC(O)C(C)NC(=O)C(NC(=</chem>                                                                                                             |

|               |                                                                                                                                                                                                                                                                |
|---------------|----------------------------------------------------------------------------------------------------------------------------------------------------------------------------------------------------------------------------------------------------------------|
| Structure:    | <chem>O)c1nc(nc(N)c1C)C(CC(N)=O)NCC([NH3+])<br/>C(N)=O)C(OC1OC(CO)C(O)C(O)C1OC1OC<br/>(CO)C(O)C(OC(N)=O)C1O)c1c[nH]cn1)C(=<br/>O)NC(OC1OC(C)C([NH3+])C(O)C1O)C(O)c<br/>1nc(cs1)-c1nc(cs1)C(=O)NCCCCNC(=S)[N-<br/>]F</chem>                                     |
| Name:         | TMR-Se                                                                                                                                                                                                                                                         |
| Localization: | 3, 6                                                                                                                                                                                                                                                           |
| Method:       | Fluorescence Microscopy                                                                                                                                                                                                                                        |
| References:   | 295                                                                                                                                                                                                                                                            |
| Structure:    | <chem>CN(C)c1ccc2c([Se]C3=CC(C=CC3=C2c2ccc<br/>cc2)=[N+](C)C)c1</chem>                                                                                                                                                                                         |
| Name:         | 8-oxoguanine                                                                                                                                                                                                                                                   |
| Localization: | 2, 3                                                                                                                                                                                                                                                           |
| Method:       | Fluorescence Microscopy                                                                                                                                                                                                                                        |
| References:   | 296                                                                                                                                                                                                                                                            |
| Structure:    | <chem>NC1=NC(=O)C2=NC(=O)N=C2N1</chem>                                                                                                                                                                                                                         |
| Name:         | TMPyP; meso-tetra(4-N-methylpyridyl)porphyrin                                                                                                                                                                                                                  |
| Localization: | 1, 3                                                                                                                                                                                                                                                           |
| Method:       | Fluorescence Microscopy                                                                                                                                                                                                                                        |
| References:   | 299                                                                                                                                                                                                                                                            |
| Structure:    | <chem>C[n+]1ccc(cc1)-c1c2ccc(n2)c(-<br/>c2cc[n+](C)cc2)c2ccc([nH]2)c(-<br/>c2cc[n+](C)cc2)c2ccc([nH]2)c(-<br/>c2cc[n+](C)cc2)c2ccc1n2</chem>                                                                                                                   |
| Name:         | PF-TMRos                                                                                                                                                                                                                                                       |
| Localization: | 1, 2                                                                                                                                                                                                                                                           |
| Method:       | Fluorescence Microscopy                                                                                                                                                                                                                                        |
| References:   | 306                                                                                                                                                                                                                                                            |
| Structure:    | <chem>CN(C)c1ccc2c(OC3=CC(C=CC3=C2c2c(F)c<br/>F)c(F)c(F)c2F)=[N+](C)C)c1</chem>                                                                                                                                                                                |
| Name:         | PEG-HPpt; diammine { 7,12-bis[1-(polyethyleneglycol-750-monomethylether-1-yl)ethyl]-3,8,13,17-2,18-dipropionato } platinum(II)tetramethylporphyrin                                                                                                             |
| Localization: | 4, 5                                                                                                                                                                                                                                                           |
| Method:       | Fluorescence Microscopy                                                                                                                                                                                                                                        |
| References:   | 313                                                                                                                                                                                                                                                            |
| Structure:    | <chem>COCCOCCOCCOCCOCCOCCOCCOCCOCCOCCOC<br/>COCCOCCOCCOCCOCCOCCOCCOCCOCCOC<br/>(C)c1c(C)c2cc3[nH]c(cc4nc5cc6[nH]c(cc1n2)<br/>c(C)c6CCC(=O)O[Pt--<br/>(N)(N)OC(=O)Cc5c4C)c(C)c3C(C)OCCOC<br/>COCCOCCOCCOCCOCCOCCOCCOCCOCCOC<br/>COCCOCCOCCOCCOCCOCCOCCOC</chem> |
| Name:         | PEG-HP; 7,12-bis[1-(polyethyleneglycol-750-monomethylether-1-yl)ethyl]-3,8,13,17-tetramethylporphyrin-2,18-dipropionic acid                                                                                                                                    |
| Localization: | 4, 5                                                                                                                                                                                                                                                           |
| Method:       | Fluorescence Microscopy                                                                                                                                                                                                                                        |
| References:   | 313                                                                                                                                                                                                                                                            |
| Structure:    | <chem>COCCOCCOCCOCCOCCOCCOCCOCCOCCOC</chem>                                                                                                                                                                                                                    |



|               |                                                                                                                                                                                                                                                                                 |
|---------------|---------------------------------------------------------------------------------------------------------------------------------------------------------------------------------------------------------------------------------------------------------------------------------|
| Structure:    | [O-]C(=O)COCCOCCOCCOCCOCCOCCOCCNC(=O)COCC(=O)Nc1ccc(cc1)-c1c2ccc(n2)c(-c2ccccc2)c2ccc([nH]2)c(-c2ccccc2)c2ccc(n2)c(-c2ccc(NC(=O)COCC(=O)NCCOCCOCCOCCOCCOCCOCC([O-])=O)cc2)c2ccc1[nH]2                                                                                           |
| Name:         | PEG-Functionalized meso-TPP Conjugate 8                                                                                                                                                                                                                                         |
| Localization: | 1, 2                                                                                                                                                                                                                                                                            |
| Method:       | Fluorescence Microscopy                                                                                                                                                                                                                                                         |
| References:   | 393                                                                                                                                                                                                                                                                             |
| Structure:    | [O-]C(=O)COCCOCCOCCOCCOCCOCCOCCNC(=O)COCC(=O)Nc1ccc(cc1)-c1c2ccc(n2)c(-c2ccccc2)c2ccc([nH]2)c(-c2ccc(NC(=O)COCC(=O)NCCOCCOCCOCCOCCOCCOCC([O-])=O)cc2)c2ccc(n2)c(-c2ccc(NC(=O)COCC(=O)NCCOCCOCCOCCOCCOCCOCC([O-])=O)cc2)c2ccc1[nH]2                                              |
| Name:         | PEG-Functionalized meso-TPP Conjugate 9                                                                                                                                                                                                                                         |
| Localization: | 1, 2                                                                                                                                                                                                                                                                            |
| Method:       | Fluorescence Microscopy                                                                                                                                                                                                                                                         |
| References:   | 393                                                                                                                                                                                                                                                                             |
| Structure:    | [O-]C(=O)COCCOCCOCCOCCOCCOCCOCCNC(=O)COCC(=O)Nc1ccc(cc1)-c1c2ccc(n2)c(-c2ccc(NC(=O)COCC(=O)NCCOCCOCCOCCOCCOCCOCC([O-])=O)cc2)c2ccc([nH]2)c(-c2ccc(NC(=O)COCC(=O)NCCOCCOCCOCCOCCOCCOCC([O-])=O)cc2)c2ccc(n2)c(-c2ccc(NC(=O)COCC(=O)NCCOCCOCCOCCOCCOCCOCC([O-])=O)cc2)c2ccc1[nH]2 |
| Name:         | SNAFR-1                                                                                                                                                                                                                                                                         |
| Localization: | 2, 3, 5                                                                                                                                                                                                                                                                         |
| Method:       | Fluorescence Microscopy                                                                                                                                                                                                                                                         |
| References:   | 417                                                                                                                                                                                                                                                                             |
| Structure:    | Oc1ccc2c(OC3=CC=C4C(=O)C=CC=C4C3=C2c2ccccc2)c1                                                                                                                                                                                                                                  |
| Name:         | TPYR-PP                                                                                                                                                                                                                                                                         |
| Localization: | 4, 6                                                                                                                                                                                                                                                                            |
| Method:       | Fluorescence Microscopy                                                                                                                                                                                                                                                         |
| References:   | 436                                                                                                                                                                                                                                                                             |
| Structure:    | CCCCCCCCCCCCCCCCOc1ccc(cc1)-c1c2ccc(n2)c(-c2cncnc2)c2ccc([nH]2)c(-c2cncnc2)c2ccc(n2)c(-c2cncnc2)c2ccc1[nH]2                                                                                                                                                                     |
| Name:         | C16-TTP                                                                                                                                                                                                                                                                         |
| Localization: | 4, 6                                                                                                                                                                                                                                                                            |
| Method:       | Fluorescence Microscopy                                                                                                                                                                                                                                                         |
| References:   | 436                                                                                                                                                                                                                                                                             |
| Structure:    | CCCCCCCCCCCCCCCCOc1ccc(cc1)-c1c2ccc(n2)c(-c2ccc(C)cc2)c2ccc([nH]2)c(-c2ccc(C)cc2)c2ccc(n2)c(-c2ccc(C)cc2)c2ccc1[nH]2                                                                                                                                                            |
| Name:         | Berberine                                                                                                                                                                                                                                                                       |

|               |                                                     |
|---------------|-----------------------------------------------------|
| Localization: | 2, 3, 6                                             |
| Method:       | Fluorescence Microscopy                             |
| References:   | 473                                                 |
| Structure:    | COc1ccc2cc3-c4cc5OCOc5cc4CC[n+ ]3cc2c1OC            |
| Name:         | CO-1                                                |
| Localization: | 1, 3                                                |
| Method:       | Fluorescence Microscopy                             |
| References:   | 474                                                 |
| Structure:    | CN1C(=O)C=C2c3ccccc3C(=O)c3c(NCC[NH+](C)C)ccc1c23   |
| Name:         | CO-3                                                |
| Localization: | 1, 4                                                |
| Method:       | Fluorescence Microscopy                             |
| References:   | 474                                                 |
| Structure:    | CN1C(=O)C=C2c3ccccc3C(=O)c3c(NCCC[NH+](C)C)ccc1c23  |
| Name:         | CO-4                                                |
| Localization: | 1, 5                                                |
| Method:       | Fluorescence Microscopy                             |
| References:   | 474                                                 |
| Structure:    | CC[NH2+ ]CCNc1ccc2N(C)C(=O)C=C3c4ccc cc4C(=O)c1c23  |
| Name:         | CO-5                                                |
| Localization: | 1, 6                                                |
| Method:       | Fluorescence Microscopy                             |
| References:   | 474                                                 |
| Structure:    | CC[NH+](CC)CCNc1ccc2N(C)C(=O)C=C3c4ccccc4C(=O)c1c23 |
| Name:         | CO-6                                                |
| Localization: | 1, 3                                                |
| Method:       | Fluorescence Microscopy                             |
| References:   | 474                                                 |
| Structure:    | CN1C(=O)C=C2c3ccccc3C(=O)c3c(NCC[NH2+ ]CCO)ccc1c23  |
| Name:         | CO-7                                                |
| Localization: | 1, 3                                                |
| Method:       | Fluorescence Microscopy                             |
| References:   | 474                                                 |
| Structure:    | CN1C(=O)C=C2c3ccccc3C(=O)c3c(NCC[NH3+ ])ccc1c23     |
| Name:         | 4-Hydroxymethyl-3- aminoacridine Derivative 13      |
| Localization: | 3, 6                                                |
| Method:       | Fluorescence Microscopy                             |
| References:   | 478                                                 |
| Structure:    | CCOC(=O)Nc1ccc2cc3ccc(N)c(CO)c3nc2c1                |
| Name:         | Polyamide-Bodipy FL Conjugate 1                     |
| Localization: | 3, 6                                                |
| Method:       | Fluorescence Microscopy                             |
| References:   | 480                                                 |
| Structure:    | C[NH+](C)CCCNc(=O)CCNC(=O)c1cc(NC(                  |

|               |                                                                                                                                                                                                                                                                   |
|---------------|-------------------------------------------------------------------------------------------------------------------------------------------------------------------------------------------------------------------------------------------------------------------|
|               | <chem>=O)c2cc(NC(=O)c3cc(NC(=O)c4cc(NC(=O)C<br/>CCNC(=O)c5cc(NC(=O)c6cc(NC(=O)c7cc(N<br/>C(=O)c8ncn8C)cn7CCCNC(=O)CCC7=[N+]<br/>8C(C=C7)=Cc7c(C)cc(C)n7[B-<br/>]8(F)F)cn6C)cn5C)cn4C)cn3C)cn2C)cn1C</chem>                                                        |
| Name:         | Polyamide-Bodipy FL Conjugate 2                                                                                                                                                                                                                                   |
| Localization: | 3, 6                                                                                                                                                                                                                                                              |
| Method:       | Fluorescence Microscopy                                                                                                                                                                                                                                           |
| References:   | 480                                                                                                                                                                                                                                                               |
| Structure:    | <chem>C[NH+](C)CCCNC(=O)CCNC(=O)c1cc(NC(=O)c2cc(NC(=O)c3cc(NC(=O)c4cc(NC(=O)C<br/>CCNC(=O)c5cc(NC(=O)c6cc(NC(=O)c7nc(N<br/>C(=O)c8ncn8C)cn7C)cn6CCCNC(=O)CCC6<br/>=[N+]7C(C=C6)=Cc6c(C)cc(C)n6[B-<br/>]7(F)F)cn5C)cn4C)cn3C)cn2C)cn1C</chem>                      |
| Name:         | Polyamide-Bodipy FL Conjugate 3                                                                                                                                                                                                                                   |
| Localization: | 3, 6                                                                                                                                                                                                                                                              |
| Method:       | Fluorescence Microscopy                                                                                                                                                                                                                                           |
| References:   | 480                                                                                                                                                                                                                                                               |
| Structure:    | <chem>C[NH+](C)CCCNC(=O)CCNC(=O)c1cc(NC(=O)c2nc(NC(=O)CCNC(=O)c3cc(NC(=O)c4n<br/>c(NC(=O)CCCNC(=O)c5cc(NC(=O)c6nc(NC<br/>(=O)CCNC(=O)c7cc(NC(=O)c8ncn8C)cn7C<br/>CCNC(=O)CCC7=[N+]8C(C=C7)=Cc7c(C)cc<br/>(C)n7[B-<br/>]8(F)F)cn6C)cn5C)cn4C)cn3C)cn2C)cn1C</chem> |
| Name:         | Vecuronium                                                                                                                                                                                                                                                        |
| Localization: | 2, 3                                                                                                                                                                                                                                                              |
| Method:       | Cell Fractionation                                                                                                                                                                                                                                                |
| References:   | 485                                                                                                                                                                                                                                                               |
| Structure:    | <chem>CC(=O)OC1CC2CCC3C4CC(C(OC(C)=O)C<br/>4CCC3C2(C)CC1[NH+]1CCCCC1)[N+]1(C)<br/>CCCCC1</chem>                                                                                                                                                                   |
| Name:         | Org 6368                                                                                                                                                                                                                                                          |
| Localization: | 2, 3                                                                                                                                                                                                                                                              |
| Method:       | Cell Fractionation                                                                                                                                                                                                                                                |
| References:   | 485                                                                                                                                                                                                                                                               |
| Structure:    | <chem>CC(=O)OC1CC2CCC3C4CC(CC4CCC3C2(<br/>C)CC1[N+]1(C)CCCCC1)[N+]1(C)CCCCC1</chem>                                                                                                                                                                               |
| Name:         | Pancuronium                                                                                                                                                                                                                                                       |
| Localization: | 1, 2                                                                                                                                                                                                                                                              |
| Method:       | Cell Fractionation                                                                                                                                                                                                                                                |
| References:   | 485                                                                                                                                                                                                                                                               |
| Structure:    | <chem>CC(=O)OC1CC2CCC3C4CC(C(OC(C)=O)C<br/>4CCC3C2(C)CC1[N+]1(C)CCCCC1)[N+]1(C)</chem>                                                                                                                                                                            |

|               |                                                                                                                                          |
|---------------|------------------------------------------------------------------------------------------------------------------------------------------|
|               | <chem>)CCCCC1</chem>                                                                                                                     |
| Name:         | Ageladine A                                                                                                                              |
| Localization: | 1, 4                                                                                                                                     |
| Method:       | Fluorescence Microscopy                                                                                                                  |
| References:   | 488                                                                                                                                      |
| Structure:    | <chem>Nc1[nH]c2cc(ncc2[nH+])-<br/>c1cc(Br)c(Br)[nH]1</chem>                                                                              |
| Name:         | Dimethyl-PEPEP                                                                                                                           |
| Localization: | 2, 3                                                                                                                                     |
| Method:       | Fluorescence Microscopy                                                                                                                  |
| References:   | 502                                                                                                                                      |
| Structure:    | <chem>Cn1c(ccc1\C=C\c1cc[n+](C)cc1)\C=C\c1cc[n<br/>+](C)cc1</chem>                                                                       |
| Name:         | Chlorin 1                                                                                                                                |
| Localization: | 1, 2, 5                                                                                                                                  |
| Method:       | Fluorescence Microscopy                                                                                                                  |
| References:   | 540                                                                                                                                      |
| Structure:    | <chem>OC1C(O)c2nc1c(-c1cccc1)c1ccc([nH]1)c(-<br/>c1cccc1)c1ccc(n1)c(-<br/>c1cccc1)c1ccc([nH]1)c2-c1cccc1</chem>                          |
| Name:         | Chlorin 3                                                                                                                                |
| Localization: | 1, 2                                                                                                                                     |
| Method:       | Fluorescence Microscopy                                                                                                                  |
| References:   | 540                                                                                                                                      |
| Structure:    | <chem>OC1C(O)c2nc1c(-<br/>c1cccc(O)c1)c1ccc([nH]1)c(-<br/>c1cccc(O)c1)c1ccc(n1)c(-<br/>c1cccc(O)c1)c1ccc([nH]1)c2-c1cccc(O)c1</chem>     |
| Name:         | Chlorin 4                                                                                                                                |
| Localization: | 1, 2                                                                                                                                     |
| Method:       | Fluorescence Microscopy                                                                                                                  |
| References:   | 540                                                                                                                                      |
| Structure:    | <chem>COc1cccc(c1)-c1c2nc(C(O)C2O)c(-<br/>c2cccc(OC)c2)c2ccc([nH]2)c(-<br/>c2cccc(OC)c2)c2ccc(n2)c(-<br/>c2cccc(OC)c2)c2ccc1[nH]2</chem> |
| Name:         | HDAO                                                                                                                                     |
| Localization: | 2, 6                                                                                                                                     |
| Method:       | Fluorescence Microscopy                                                                                                                  |
| References:   | 72                                                                                                                                       |
| Structure:    | <chem>CCCCCCCCCCCCCCCC[N+]1=C2C=C(C=<br/>CC2=CC2=C1C=C(C=C2)N(C)C)N(C)C</chem>                                                           |

**Supplemental Table 8: Summary of the subcellular localization data set.**

| Reported subcellular localization site | No. of molecules | %     | No. of references |
|----------------------------------------|------------------|-------|-------------------|
| Endo-lysosomes                         | 226              | 23.37 | 96                |
| Mitochondria                           | 259              | 26.78 | 136               |
| Nucleus                                | 123              | 12.72 | 67                |
| Plasma membrane                        | 162              | 16.75 | 75                |
| ER/Golgi                               | 37               | 3.83  | 26                |
| Cytosol                                | 59               | 6.10  | 59                |
| Multiple localizations                 | 101              | 10.44 | 71                |
| Total                                  | 967              | 100   |                   |

**Supplemental Table 9: Summary of experimental methods.**

| Experimental Methods       | Count | Percentage (%) |
|----------------------------|-------|----------------|
| Pharmacological effects    | 171   | 17.68          |
| Chemical analysis          |       |                |
| Uptake/binding experiments | 67    | 6.93           |
| Cell fractionation         | 54    | 5.58           |
| Microscopic imaging        |       |                |
| Fluorescence               | 633   | 65.46          |
| Histochemistry             | 9     | 0.93           |
| Others                     | 6     | 0.62           |
| Not mentioned              | 25    | 2.59           |
| Mixed                      | 2     | 0.21           |



## Supplemental Table 10: References to the dataset with subcellular localization information.

### ID      References

1      Seglen PO, Gordon PB: **Effects of lysosomotropic monoamines, diamines, amino alcohols, and other amino compounds on protein degradation and protein synthesis in isolated rat hepatocytes.** *Mol Pharmacol* 1980, **18**(3):468-475.

2      Reasor MJ, Kacew S: **Drug-induced phospholipidosis: are there functional consequences?** *Exp Biol Med (Maywood)* 2001, **226**(9):825-830.

3      Cramb G: **Selective lysosomal uptake and accumulation of the beta-adrenergic antagonist propranolol in cultured and isolated cell systems.** *Biochem Pharmacol* 1986, **35**(8):1365-1372.

4      Horobin RW, Trapp S, Weissig V: **Mitochondriotropics: a review of their mode of action, and their applications for drug and DNA delivery to mammalian mitochondria.** *J Control Release* 2007, **121**(3):125-136.

5      Ishizaki J, Yokogawa K, Ichimura F, Ohkuma S: **Uptake of imipramine in rat liver lysosomes in vitro and its inhibition by basic drugs.** *J Pharmacol Exp Ther* 2000, **294**(3):1088-1098.

6      Ploemen JP, Kelder J, Hafmans T, van de Sandt H, van Burgsteden JA, Saleminki PJ, van Esch E: **Use of physicochemical calculation of pKa and CLogP to predict phospholipidosis-inducing potential: a case study with structurally related piperazines.** *Exp Toxicol Pathol* 2004, **55**(5):347-355.

7      Falgueyret JP, Desmarais S, Oballa R, Black WC, Cromlish W, Khougaz K, Lamontagne S, Masse F, Riendeau

- D, Toulmond S *et al*: **Lysosomotropism of basic cathepsin K inhibitors contributes to increased cellular potencies against off-target cathepsins and reduced functional selectivity.** *J Med Chem* 2005, **48**(24):7535-7543.
- 8 Fujimura H, Dekura E, Kurabe M, Shimazu N, Koitabashi M, Toriumi W: **Cell-based fluorescence assay for evaluation of new-drugs potential for phospholipidosis in an early stage of drug development.** *Exp Toxicol Pathol* 2007, **58**(6):375-382.
- 11 Li W, Yuan XM, Ivanova S, Tracey KJ, Eaton JW, Brunk UT: **3-Aminopropanal, formed during cerebral ischaemia, is a potent lysosomotropic neurotoxin.** *Biochem J* 2003, **371**(Pt 2):429-436.
- 12 Gabrielli D, Belisle E, Severino D, Kowaltowski AJ, Baptista MS: **Binding, aggregation and photochemical properties of methylene blue in mitochondrial suspensions.** *Photochem Photobiol* 2004, **79**(3):227-232.
- 13 Bielawska A, Bielawski J, Szulc ZM, Mayroo N, Liu X, Bai A, Elojeimy S, Rembiesa B, Pierce J, Norris JS *et al*: **Novel analogs of D-e-MAPP and B13. Part 2: signature effects on bioactive sphingolipids.** *Bioorg Med Chem* 2008, **16**(2):1032-1045.
- 14 Dykens JA, Jamieson JD, Marroquin LD, Nadanaciva S, Xu JJ, Dunn MC, Smith AR, Will Y: **In vitro assessment of mitochondrial dysfunction and cytotoxicity of nefazodone, trazodone, and buspirone.** *Toxicol Sci* 2008, **103**(2):335-345.
- 17 Chen VY, Posada MM, Zhao L, Rosania GR: **Rapid doxorubicin efflux from the nucleus of drug-resistant cancer cells following extracellular drug clearance.** *Pharm Res* 2007, **24**(11):2156-2167.
- 19 Horton KL, Stewart KM, Fonseca SB, Guo Q, Kelley SO: **Mitochondria-penetrating peptides.** *Chem Biol* 2008, **15**(4):375-382.
- 23 Feldman S, Wang MY, Kaloyanides GJ: **Aminoglycosides induce a phospholipidosis in the renal cortex of the rat: an early manifestation of nephrotoxicity.** *J Pharmacol Exp Ther* 1982, **220**(3):514-520.
- 24 Martin WJ, 2nd, Standing JE: **Amiodarone pulmonary toxicity: biochemical evidence for a cellular phospholipidosis in the bronchoalveolar lavage of human subjects.** *J Pharmacol Exp Ther* 1988, **244**(2):774-779.
- 25 Smith RA, Porteous CM, Gane AM, Murphy MP: **Delivery of bioactive molecules to mitochondria in vivo.** *Proc Natl Acad Sci U S A* 2003, **100**(9):5407-5412.
- 26 Ross MF, Prime TA, Abakumova I, James AM, Porteous CM, Smith RA, Murphy MP: **Rapid and extensive uptake and activation of hydrophobic triphenylphosphonium cations within cells.** *Biochem J* 2008, **411**(3):633-645.
- 27 Weiss MJ, Wong JR, Ha CS, Bleday R, Salem RR, Steele GD, Jr., Chen LB: **Dequalinium, a topical antimicrobial agent, displays anticarcinoma activity based on selective mitochondrial accumulation.** *Proc Natl Acad Sci U S A* 1987, **84**(15):5444-5448.
- 28 Terasaki M, Song J, Wong JR, Weiss MJ, Chen LB: **Localization of endoplasmic reticulum in living and glutaraldehyde-fixed cells with fluorescent dyes.** *Cell* 1984, **38**(1):101-108.
- 29 Fantin VR, Berardi MJ, Scorrano L, Korsmeyer SJ, Leder P: **A novel mitochondriotoxic small molecule that selectively inhibits tumor cell growth.** *Cancer Cell* 2002, **2**(1):29-42.
- 31 Zhao KS, Zhao GM, Wu DL, Soong Y, Birk AV, Schiller PW, Szeto HH: **Cell-permeable peptide antioxidants targeted to inner mitochondrial membrane inhibit mitochondrial swelling, oxidative cell death, and reperfusion injury.** *Journal of Biological Chemistry* 2004, **279**(33):34682-34690.
- 33 Fernandez-Carneado J, Van Gool M, Martos V, Castel S, Prados P, de Mendoza J, Giralt E: **Highly efficient, nonpeptidic oligoguanidinium vectors that selectively internalize into mitochondria.** *J Am Chem Soc* 2005, **127**(3):869-874.
- 37 Burns RJ, Smith RAJ, Murphy MP: **Synthesis and Characterization of Thiobutyltriphenylphosphonium Bromide, a Novel Thiol Reagent Targeted to the Mitochondrial Matrix.** *Archives of Biochemistry and Biophysics* 1995, **322**(1):60-68.
- 38 Filipovska A, Kelso GF, Brown SE, Beer SM, Smith RAJ, Murphy MP: **Synthesis and characterization of a triphenylphosphonium-conjugated peroxidase mimetic - Insights into the interaction of ebselen with mitochondria.** *Journal of Biological Chemistry* 2005, **280**(25):24113-24126.
- 39 James AM, Blaikie FH, Smith RAJ, Lightowers RN, Smith PM, Murphy MP: **Specific targeting of a DNA-alkylating reagent to mitochondria - Synthesis and characterization of [4-((11aS)-7-methoxy-1,2,3,11a-tetrahydro-5H-pyrrolo[2,1-c][1,4]benzodiazepin-5-on-8-oxy)butyl]-triphenylphosphonium iodide.** *European Journal of Biochemistry* 2003, **270**(13):2827-2836.
- 41 Kowaltowski AJ, Turin J, Indig GL, Vercesi AE: **Mitochondrial effects of triarylmethane dyes.** *J Bioenerg Biomembr* 1999, **31**(6):581-590.
- 42 Martin WJ, Kachel DL, Vilen T, Natarajan V: **Mechanism of Phospholipidosis in Amiodarone Pulmonary**

**Toxicity.** *Journal of Pharmacology and Experimental Therapeutics* 1989, **251**(1):272-278.

44 Li W, Yuan XM, Nordgren G, Dalen H, Dubowchik GM, Firestone RA, Brunk UT: **Induction of cell death by the lysosomotropic detergent MSDH.** *Febs Letters* 2000, **470**(1):35-39.

45 Boya P, Gonzalez-Polo RA, Poncet D, Andreau K, Vieira HLA, Roumier T, Perfettini JL, Kroemer G: **Mitochondrial membrane permeabilization is a critical step of lysosome-initiated apoptosis induced by hydroxychloroquine.** *Oncogene* 2003, **22**(25):3927-3936.

46 Dubowchik GM, Gawlak SL, Firestone RA: **The in vitro effects of three lysosomotropic detergents against three human tumor cell lines** *Bioorganic & Medicinal Chemistry Letters* 1995, **5**(8):893-898.

47 Dodin G, Averbeck D, Demerseman P, Nocentini S, Dupont J: **Mitochondrial Uptake of Bridged Bis-Methylpyridinium Aldoximes and Induction of the Petite Phenotype in Yeast.** *Biochemical and Biophysical Research Communications* 1991, **179**(2):992-999.

49 Davey GP, Tipton KF, Murphy MP: **Uptake and Accumulation of 1-Methyl-4-Phenylpyridinium by Rat-Liver Mitochondria Measured Using an Ion-Selective Electrode.** *Biochemical Journal* 1992, **288**:439-443.

50 Poot M, Zhang YZ, Kramer JA, Wells KS, Jones L, Hanzel DK, Lugade AG, Singer VL, Haughland RP: **Analysis of mitochondrial morphology and function with novel fixable fluorescent stains.** *Journal of Histochemistry & Cytochemistry* 1996, **44**(12):1363-1372.

51 Niemann A, Takatsuki A, Elsasser HP: **The lysosomotropic agent monodansylcadaverine also acts as a solvent polarity probe.** *Journal of Histochemistry & Cytochemistry* 2000, **48**(2):251-258.

52 Gravance CG, Garner DL, Miller MG, Berger T: **Flow cytometric assessment of changes in rat sperm mitochondrial function after treatment with pentachlorophenol.** *Toxicology in Vitro* 2003, **17**(3):253-257.

54 Deng YP, Bennink JR, Kang HC, Haugland RP, Yewdell JW: **Fluorescent Conjugates of Brefeldin-a Selectively Stain the Endoplasmic-Reticulum and Golgi-Complex of Living Cells.** *Journal of Histochemistry & Cytochemistry* 1995, **43**(9):907-915.

55 Simmons DM, Mercer AV, Hallas G, Dyson JE: **Characterization of six textile dyes as fluorescent stains for flow cytometry.** *J Histochem Cytochem* 1990, **38**(1):41-49.

57 Bucana C, Saiki I, Nayar R: **Uptake and Accumulation of the Vital Dye Hydroethidine in Neoplastic-Cells.** *Journal of Histochemistry & Cytochemistry* 1986, **34**(9):1109-1115.

58 Hoff SF, Macinnis AJ: **Ultrastructural-Localization of Phenothiazines and Tetracycline - a New Histochemical Approach.** *Journal of Histochemistry & Cytochemistry* 1983, **31**(5):613-625.

62 Niemann A, Baltes J, Elsasser HP: **Fluorescence properties and staining behavior of monodansylpentane, a structural homologue of the lysosomotropic agent monodansylcadaverine.** *Journal of Histochemistry & Cytochemistry* 2001, **49**(2):177-185.

64 Jeannot V, Salmon JM, Deumie M, Viallet P: **Intracellular accumulation of rhodamine 110 in single living cells.** *Journal of Histochemistry & Cytochemistry* 1997, **45**(3):403-412.

66 Muller T: **Electron microscopic demonstration of intracellular promethazine accumulation sites by a precipitation technique: application to the cerebellar cortex of the mouse.** *J Histochem Cytochem* 1996, **44**(5):531-535.

69 Jeon CJ, Masland RH: **Selective accumulation of diamidino yellow and chromomycin A3 by retinal glial cells.** *J Histochem Cytochem* 1993, **41**(11):1651-1658.

71 Suzuki T, Fujikura K, Higashiyama T, Takata K: **DNA staining for fluorescence and laser confocal microscopy.** *J Histochem Cytochem* 1997, **45**(1):49-53.

72 Rodriguez ME, Azizuddin K, Zhang P, Chiu SM, Lam M, Kenney ME, Burda C, Oleinick NL: **Targeting of mitochondria by 10-N-alkyl acridine orange analogues: role of alkyl chain length in determining cellular uptake and localization.** *Mitochondrion* 2008, **8**(3):237-246.

73 Weitering JG, Lammers W, Meijer DK, Mulder GJ: **Localization of d-tubocurarine in rat liver lysosomes. Lysosomal uptake, biliary excretion and displacement by quinacrine in vivo.** *Naunyn Schmiedebergs Arch Pharmacol* 1977, **299**(3):277-281.

74 Journey LJ, Goldstein MN: **The effect of terramycin on the fine structure of HeLa cell mitochondria.** *Cancer Res* 1963, **23**:551-554.

75 Rafael J, Nicholls DG: **Mitochondrial membrane potential monitored in situ within isolated guinea pig brown adipocytes by a styryl pyridinium fluorescent indicator.** *FEBS Lett* 1984, **170**(1):181-185.

76 Johnson LV, Walsh ML, Bockus BJ, Chen LB: **Monitoring of relative mitochondrial membrane potential in living cells by fluorescence microscopy.** *J Cell Biol* 1981, **88**(3):526-535.

77 Schneider K, Naujok A, Zimmermann HW: **Influence of trans-membrane potential and of hydrophobic interactions on dye accumulation in mitochondria of living cells. Photoaffinity labelling of mitochondrial proteins, action of potential dissipating drugs, and competitive staining.** *Histochemistry* 1994, **101**(6):455-

461.

- 78 Hahn KM, Conrad PA, Chao JC, Taylor DL, Waggoner AS: **A photocross-linking fluorescent indicator of mitochondrial membrane potential.** *J Histochem Cytochem* 1993, **41**(4):631-634.
- 81 Ohulchanskyy TY, Pudavar HE, Yarmoluk SM, Yashchuk VM, Bergey EJ, Prasad PN: **A monomethine cyanine dye Cyan 40 for two-photon-excited fluorescence detection of nucleic acids and their visualization in live cells.** *Photochem Photobiol* 2003, **77**(2):138-145.
- 82 Jimenez-Hernandez ME, Orellana G, Montero F, Portoles MT: **A ruthenium probe for cell viability measurement using flow cytometry, confocal microscopy and time-resolved luminescence.** *Photochemistry and Photobiology* 2000, **72**(1):28-34.
- 83 Chen JY, Mak NK, Yow CMN, Fung MC, Chiu LC, Leung WN, Cheung NH: **The binding characteristics and intracellular localization of temoporfin (mTHPC) in myeloid leukemia cells: Phototoxicity and mitochondrial damage.** *Photochemistry and Photobiology* 2000, **72**(4):541-547.
- 84 Malik Z, Amit I, Rothmann C: **Subcellular localization of sulfonated tetraphenyl porphines in colon carcinoma cells by spectrally resolved imaging.** *Photochem Photobiol* 1997, **65**(3):389-396.
- 85 Konan YN, Chevallier J, Gurny R, Allemann E: **Encapsulation of p-THPP into nanoparticles: Cellular uptake, subcellular localization and effect of serum on photodynamic activity.** *Photochemistry and Photobiology* 2003, **77**(6):638-644.
- 86 Feofanov A, Sharonov G, Grichine A, Karmakova T, Pljutinskaya A, Lebedeva V, Ruziyev R, Yakubovskaya R, Mironov A, Refregier M *et al*: **Comparative study of photodynamic properties of 13,15-N-cycloimide derivatives of chlorin p6.** *Photochem Photobiol* 2004, **79**(2):172-188.
- 87 Wood SR, Holroyd JA, Brown SB: **The subcellular localization of Zn(II) phthalocyanines and their redistribution on exposure to light.** *Photochemistry and Photobiology* 1997, **65**(3):397-402.
- 88 Cauchon N, Nader M, Bkaily G, van Lier JE, Hunting D: **Photodynamic activity of substituted zinc trisulfophthalocyanines: Role of plasma membrane damage.** *Photochemistry and Photobiology* 2006, **82**(6):1712-1720.
- 90 Theodossiou T, Spiro MD, Jacobson J, Hothersall JS, MacRobert AJ: **Evidence for intracellular aggregation of hypericin and the impact on its photocytotoxicity in PAM 212 murine keratinocytes.** *Photochemistry and Photobiology* 2004, **80**(3):438-443.
- 92 MacDonald IJ, Morgan J, Bellnier DA, Paszkiewicz GM, Whitaker JE, Litchfield DJ, Dougherty TJ: **Subcellular localization patterns and their relationship to photodynamic activity of pyropheophorbide-a derivatives.** *Photochem Photobiol* 1999, **70**(5):789-797.
- 93 Chen JY, Cheung NH, Fung MC, Wen JM, Leung WN, Mak NK: **Subcellular localization of merocyanine 540 (MC540) and induction of apoptosis in murine myeloid leukemia cells.** *Photochemistry and Photobiology* 2000, **72**(1):114-120.
- 94 Sun X, Leung WN: **Photodynamic therapy with pyropheophorbide-a methyl ester in human lung carcinoma cancer cell: Efficacy, localization and apoptosis.** *Photochemistry and Photobiology* 2002, **75**(6):644-651.
- 95 Wilson BC, Olivo M, Singh G: **Subcellular localization of Photofrin(R) and aminolevulinic acid and photodynamic cross-resistance in vitro in radiation-induced fibrosarcoma cells sensitive or resistant to photofrin-mediated photodynamic therapy.** *Photochemistry and Photobiology* 1997, **65**(1):166-176.
- 96 Georgakoudi I, Foster TH: **Effects of the subcellular redistribution of two Nile blue derivatives on photodynamic oxygen consumption.** *Photochemistry and Photobiology* 1998, **68**(1):115-122.
- 97 Ouedraogo G, Morliere P, Bazin N, Santus P, Kratzer B, Miranda MA, Castell JV: **Lysosomes are sites of fluoroquinolone photosensitization in human skin fibroblasts: A microspectrofluorometric approach.** *Photochemistry and Photobiology* 1999, **70**(2):123-129.
- 98 Kessel D, Poretz RD: **Sites of photodamage induced by photodynamic therapy with a chlorin e6 triacetoxymethyl ester (CAME).** *Photochemistry and Photobiology* 2000, **71**(1):94-96.
- 99 Kessel D, Castelli M: **Evidence that bcl-2 is the target of three photosensitizers that induce a rapid apoptotic response.** *Photochemistry and Photobiology* 2001, **74**(2):318-322.
- 100 Kessel D, Reiners JJ, Jr.: **Apoptosis and autophagy after mitochondrial or endoplasmic reticulum photodamage.** *Photochem Photobiol* 2007, **83**(5):1024-1028.
- 101 Morliere P, Haigle J, Aissani K, Filipe P, Silva JN, Santus R: **An insight into the mechanisms of the phototoxic response induced by cyamemazine in cultured fibroblasts and keratinocytes.** *Photochemistry and Photobiology* 2004, **79**(2):163-171.
- 102 Delaey EM, Vantieghem AM, Derycke A, Agostinis PM, de Witte PAM: **In vitro photobiological evaluation of Rhodac, a new rhodacyanine photosensitizer.** *Photochemistry and Photobiology* 2001, **74**(2):331-338.

104 Wang XP, Krebs LJ, Al-Nuri M, Pudavar HE, Ghosal S, Liebow C, Nagy AA, Schally AV, Prasad PN: **A chemically labeled cytotoxic agent: Two-photon fluorophore for optical tracking of cellular pathway in chemotherapy.** *Proceedings of the National Academy of Sciences of the United States of America* 1999, **96**(20):11081-11084.

106 Houghton PJ, Bailey FC, Houghton JA, Murti KG, Howbert JJ, Grindey GB: **Evidence for Mitochondrial Localization of N-(4-Methylphenylsulfonyl)-N'-(4-Chlorophenyl)Urea in Human Colon Adenocarcinoma Cells.** *Cancer Research* 1990, **50**(3):664-668.

108 Illinger D, Poindron P, Fonteneau P, Modollel M, Kuhry JG: **Internalization of the Lipophilic Fluorescent-Probe Trimethylamino-Diphenylhexatriene Follows the Endocytosis and Recycling of the Plasma-Membrane in Cells.** *Biochimica Et Biophysica Acta* 1990, **1030**(1):73-81.

109 Oseroff AR, Ohuoha D, Ara G, Mcauliffe D, Foley J, Cincotta L: **Intramitochondrial Dyes Allow Selective Invitro Photolysis of Carcinoma-Cells.** *Proceedings of the National Academy of Sciences of the United States of America* 1986, **83**(24):9729-9733.

110 Woodburn KW, Fan Q, Miles DR, Kessel D, Luo Y, Young SW: **Localization and efficacy analysis of the phototherapeutic lutetium texaphyrin (PCI-0123) in the murine EMT6 sarcoma model.** *Photochemistry and Photobiology* 1997, **65**(3):410-415.

111 Peng Q, Moan J, Farrants G, Danielsen HE, Rimington C: **Localization of Potent Photosensitizers in Human Tumor Lox by Means of Laser Scanning Microscopy.** *Cancer Letters* 1991, **58**(1-2):17-27.

112 Lin CW, Shulok JR, Kirley SD, Cincotta L, Foley JW: **Lysosomal Localization and Mechanism of Uptake of Nile Blue Photosensitizers in Tumor-Cells.** *Cancer Research* 1991, **51**(10):2710-2719.

115 Li Q, Kim Y, Namm J, Kulkarni A, Rosania GR, Ahn YH, Chang YT: **RNA-selective, live cell imaging probes for studying nuclear structure and function.** *Chemistry & Biology* 2006, **13**(6):615-623.

117 Morliere P, Maziere JC, Santus R, Smith CD, Prinsep MR, Stobbe CC, Fenning MC, Golberg JL, Chapman JD: **Tolyporphin: A natural product from cyanobacteria with potent photosensitizing activity against tumor cells in vitro and in vivo.** *Cancer Research* 1998, **58**(16):3571-3578.

118 Koller ME, Romslo I: **Uptake of Protoporphyrin-Ix by Isolated Rat-Liver Mitochondria.** *Biochemical Journal* 1980, **188**(2):329-335.

120 Kamishohara M, Kenney S, Domergue R, Vistica DT, Sausville EA: **Selective accumulation of the endoplasmic reticulum-Golgi intermediate compartment induced by the antitumor drug KRN5500.** *Exp Cell Res* 2000, **256**(2):468-479.

122 Sit KH, Bay BH, Paramanatham R, Tana HM, Wong KP: **Acidification-and-recovery induces nuclear accumulation of neutral red and DNA into human KB oral carcinoma cells.** *Cancer Letters* 1996, **104**(1):63-69.

125 Bonneau S, Morliere P, Brault D: **Dynamics of interactions of photosensitizers with lipoproteins and membrane-models: correlation with cellular incorporation and subcellular distribution.** *Biochemical Pharmacology* 2004, **68**(7):1443-1452.

126 Pleshkewych A, Maurer TC, Porter CW: **Ultrastructural-Changes in the Mitochondria of Intestinal Epithelium of Rodents Treated with Methylglyoxal-Bis(Guanylhydrazone).** *Cancer Research* 1983, **43**(2):646-652.

127 Allison AC, Young MR: **Uptake of Dyes and Drugs by Living Cells in Culture.** *Life Sciences* 1964, **3**(12):1407-1414.

128 Dirks RW, Molenaar C, Tanke HJ: **Visualizing RNA molecules inside the nucleus of living cells.** *Methods* 2003, **29**(1):51-57.

130 Croce AC, Bottiroli G, Supino R, Favini E, Zuco V, Zunino F: **Subcellular localization of the camptothecin analogues, topotecan and gimatecan.** *Biochemical Pharmacology* 2004, **67**(6):1035-1045.

131 Pagano RE, Martin OC, Kang HC, Haugland RP: **A Novel Fluorescent Ceramide Analog for Studying Membrane Traffic in Animal-Cells - Accumulation at the Golgi-Apparatus Results in Altered Spectral Properties of the Sphingolipid Precursor.** *Journal of Cell Biology* 1991, **113**(6):1267-1279.

132 Pandey SK, Gryshuk AL, Graham A, Ohkubo K, Fukuzumi S, Dobhal MP, Zheng G, Ou ZP, Zhan RQ, Kadish KM *et al*: **Fluorinated photosensitizers: synthesis, photophysical, electrochemical, intracellular localization, in vitro photosensitizing efficacy and determination of tumor-uptake by F-19 in vivo NMR spectroscopy.** *Tetrahedron* 2003, **59**(50):10059-10073.

133 Kunwar A, Barik A, Mishra B, Rathinasamy K, Pandey R, Priyadarsini KI: **Quantitative cellular uptake, localization and cytotoxicity of curcumin in normal and tumor cells.** *Biochimica Et Biophysica Acta-General Subjects* 2008, **1780**(4):673-679.

136 Wells G, Suggitt M, Coffills M, Baig MAH, Howard PW, Loadman PM, Hartley JA, Jenkins TC, Thurston DE:

- Fluorescent 7-diethylaminocoumarin pyrrolobenzodiazepine conjugates: Synthesis, DNA interaction, cytotoxicity and differential cellular localization.** *Bioorganic & Medicinal Chemistry Letters* 2008, **18**(6):2147-2151.
- Viola G, Facciolo L, Dall'Acqua S, Di Lisa F, Canton M, Vedaldi D, Fravolini A, Tabarrini O, Cecchetti V: **6-Aminoquinolones: photostability, cellular distribution and phototoxicity.** *Toxicology in Vitro* 2004, **18**(5):581-592.
- Kessel D, Luguya R, Vicente MGH: **Localization and photodynamic efficacy of two cationic porphyrins varying in charge distribution.** *Photochemistry and Photobiology* 2003, **78**(5):431-435.
- Tannenbaum J, Tanenbaum SW, Lo LW, Godman GC, Miranda AF: **Binding and Subcellular-Localization of Tritiated Cytochalasin-D.** *Experimental Cell Research* 1975, **91**(1):47-56.
- Hetrakul N, Civelek C, Stagg CA, Udelsman R: **In vitro accumulation of technetium-99m-sestamibi in human parathyroid mitochondria.** *Surgery* 2001, **130**(6):1011-1018.
- Scorneaux B, Shryock TR: **Intracellular accumulation, subcellular distribution, and efflux of tilmicosin in bovine mammary, blood, and lung cells.** *Journal of Dairy Science* 1999, **82**(6):1202-1212.
- Pagano RE, Sepanski MA, Martin OC: **Molecular trapping of a fluorescent ceramide analogue at the Golgi apparatus of fixed cells: interaction with endogenous lipids provides a trans-Golgi marker for both light and electron microscopy.** *J Cell Biol* 1989, **109**(5):2067-2079.
- Martin RM, Leonhardt H, Cardoso MC: **DNA labeling in living cells.** *Cytometry A* 2005, **67**(1):45-52.
- Malinin GI: **Permanent Fluorescent Staining of Nucleic-Acids in Isolated Cells.** *Journal of Histochemistry & Cytochemistry* 1978, **26**(11):1018-1020.
- Johannisson E, Thorell B: **Mithramycin Fluorescence for Quantitative-Determination of Deoxyribonucleic-Acid in Single Cells.** *Journal of Histochemistry & Cytochemistry* 1977, **25**(2):122-128.
- Claudia Piccoli DB, and Nazzareno Capitanio: **Comparative analysis of mitochondria selective dyes in different cell types detected by confocal laser scanning microscopy: methods and applications.** In: *Current Issues on Multidisciplinary Microscopy Research and Education*. Edited by L.Labajos-Broncano AM-Va. Badajoz, Spain; 2004: 130-139.
- Szeto HH, Schiller PW, Zhao K, Luo G: **Fluorescent dyes alter intracellular targeting and function of cell-penetrating tetrapeptides.** *FASEB J* 2005, **19**(1):118-120.
- Best TP, Edelson BS, Nickols NG, Dervan PB: **Nuclear localization of pyrrole-imidazole polyamide-fluorescein conjugates in cell culture.** *Proceedings of the National Academy of Sciences of the United States of America* 2003, **100**(21):12063-12068.
- Villa P, Sassella D, Corada M, Bartosek I: **Toxicity, Uptake, and Subcellular-Distribution in Rat Hepatocytes of Roxithromycin, a New Semisynthetic Macrolide, and Erythromycin Base.** *Antimicrobial Agents and Chemotherapy* 1988, **32**(10):1541-1546.
- Nassberger L, Bergstrand A, Depierre JW: **Intracellular-Distribution of Gentamicin within the Rat-Kidney Cortex - a Cell Fractionation Study.** *Experimental and Molecular Pathology* 1990, **52**(2):212-220.
- Schwab JC, Cao Y, Slowik MR, Joiner KA: **Localization of azithromycin in Toxoplasma gondii-infected cells.** *Antimicrob Agents Chemother* 1994, **38**(7):1620-1627.
- van Zandvoort MAMJ, de Grauw CJ, Gerritsen HC, Broers JLV, Egbrink MGAO, Ramaekers FCS, Slaaf DW: **Discrimination of DNA and RNA in cells by a vital fluorescent probe: Lifetime Imaging of SYTO13 in healthy and apoptotic cells.** *Cytometry* 2002, **47**(4):226-235.
- Crissman HA, Oka MS, Steinkamp JA: **Rapid staining methods for analysis of deoxyribonucleic acid and protein in mammalian cells.** *J Histochem Cytochem* 1976, **24**(1):64-71.
- Steinberg SF, Bilezikian JP, Alawqati Q: **Fura-2 Fluorescence Is Localized to Mitochondria in Endothelial-Cells.** *American Journal of Physiology* 1987, **253**(5):C744-C747.
- McLachlan A, Kekre N, McNulty J, Pandey S: **Pancratistatin: A natural anti-cancer compound that targets mitochondria specifically in cancer cells to induce apoptosis.** *Apoptosis* 2005, **10**(3):619-630.
- Nieto-Miguel T, Gajate C, Mollinedo F: **Differential targets and subcellular localization of antitumor alkyl-lysophospholipid in leukemic versus solid tumor cells.** *Journal of Biological Chemistry* 2006, **281**(21):14833-14840.
- Tremblay JF, Dussault S, Viau G, Gad F, Boushira M, Bissonnette R: **Photodynamic therapy with toluidine blue in Jurkat cells: cytotoxicity, subcellular localization and apoptosis induction.** *Photochemical & Photobiological Sciences* 2002, **1**(11):852-856.
- Zhang LL, Tardy M, Berry JP, Escaig F, Galle P: **Subcellular localization of two neurotropic drugs in three varieties of central nervous system cells by secondary ion mass spectroscopy (SIMS) microscopy.** *Biol Cell* 1992, **74**(1):99-103.

- 173 Bain JA, Mayer SE: **The intracellular localization of fluorescent convulsants.** *J Pharmacol Exp Ther* 1956, **118**(1):1-16.
- 174 Mellett LB, Woods LA: **Intracellular Distribution of N-C-14-Methyl Levorphanol in Brain, Liver and Kidney Tissue of the Rat.** *Journal of Pharmacology and Experimental Therapeutics* 1959, **125**(2):97-104.
- 175 Daniel WA, Wojcikowski J, Palucha A: **Intracellular distribution of psychotropic drugs in the grey and white matter of the brain: the role of lysosomal trapping.** *British Journal of Pharmacology* 2001, **134**(4):807-814.
- 176 Crowley KS, Phillion DP, Woodard SS, Schweitzer BA, Singh M, Shabany H, Burnette B, Hippenmeyer P, Heitmeier M, Bashkin JK: **Controlling the intracellular localization of fluorescent polyamide analogues in cultured cells.** *Bioorganic & Medicinal Chemistry Letters* 2003, **13**(9):1565-1570.
- 178 McGill A, Frank A, Emmett N, Leech SN, Turnbull DM, Birch-Machin MA, Reynolds NJ: **The antipsoriatic drug anthralin accumulates in keratinocyte mitochondria, dissipates mitochondrial membrane potential, and induces apoptosis through a pathway dependent on respiratory competent mitochondria.** *Faseb Journal* 2005, **19**(3):1012-+.
- 180 Byvoet P, Busch H: **Intracellular Distribution of 5-Bis (2-Chloroethyl)Aminouracil-2-C14 in Tissues of Tumor-Bearing Rats.** *Cancer Research* 1962, **22**(2):249-&.
- 184 Woodburn KW: **Intracellular localization of the radiation enhancer motexafin gadolinium using interferometric Fourier fluorescence microscopy.** *Journal of Pharmacology and Experimental Therapeutics* 2001, **297**(3):888-894.
- 185 Darzynkiewicz Z, Carter SP: **Photosensitizing Effects of the Tricyclic Heteroaromatic Cationic Dyes Pyronin-Y and Toluidine Blue-O (Tolonium Chloride).** *Cancer Research* 1988, **48**(5):1295-1299.
- 186 Miller GG, Brown K, Ballangrud AM, Barajas O, Xiao Z, Tulip J, Lown JW, Leithoff JM, AllalunisTurner MJ, Mehta RD *et al*: **Preclinical assessment of hypocrellin B and hypocrellin B derivatives as sensitizers for photodynamic therapy of cancer: Progress update.** *Photochemistry and Photobiology* 1997, **65**(4):714-722.
- 188 Andre N, Carre M, Brasseur G, Pourroy B, Kovacic H, Briand C, Braguer D: **Paclitaxel targets mitochondria upstream of caspase activation in intact human neuroblastoma cells.** *Febs Letters* 2002, **532**(1-2):256-260.
- 189 Benz CC, Keniry MA, Ford JM, Townsend AJ, Cox FW, Palayoor S, Matlin SA, Hait WN, Cowan KH: **Biochemical Correlates of the Antitumor and Antimitochondrial Properties of Gossypol Enantiomers.** *Molecular Pharmacology* 1990, **37**(6):840-847.
- 190 Koya K, Li Y, Wang H, Ukai T, Tatsuta N, Kawakami M, Shishido T, Chen LB: **MKT-077, a novel rhodacyanine dye in clinical trials, exhibits anticarcinoma activity in preclinical studies based on selective mitochondrial accumulation.** *Cancer Research* 1996, **56**(3):538-543.
- 192 Roy MK, Thalang VN, Trakoontivakorn G, Nakahara K: **Mahanine, a carbazole alkaloid from *Micromelum minutum*, inhibits cell growth and induces apoptosis in U937 cells through a mitochondrial dependent pathway.** *British Journal of Pharmacology* 2005, **145**(2):145-155.
- 193 Li C, Greenwood TR, Glunde K: **Glucosamine-bound near-infrared fluorescent probes with lysosomal specificity for breast tumor imaging.** *Neoplasia* 2008, **10**(4):389-398.
- 195 Marshall LA, Rhee MS, Hofmann L, Khodjakov A, Schneider E: **Increased lysosomal uptake of methotrexate-polyglutamates in two methotrexate-resistant cell lines with distinct mechanisms of resistance.** *Biochemical Pharmacology* 2005, **71**(1-2):203-213.
- 196 Schneider P: **Drug-Induced Lysosomal Disorders in Laboratory-Animals - New Substances Acting on Lysosomes.** *Archives of Toxicology* 1992, **66**(1):23-33
- 201 Van Bambeke F, Carryn S, Seral C, Chanteux H, Tyteca D, Mingeot-Leclercq MP, Tulkens PM: **Cellular pharmacokinetics and pharmacodynamics of the glycopeptide antibiotic oritavancin (LY333328) in a model of J774 mouse macrophages.** *Antimicrob Agents Chemother* 2004, **48**(8):2853-2860.
- 205 Philips FS, Sternberg SS, Cronin AP, Sodergren JE, Vidal PM: **Physiologic disposition and intracellular localization of isometamidium.** *Cancer Res* 1967, **27**(2):333-349.
- 206 Dindo D, Dahm F, Szulc Z, Bielawska A, Obeid LM, Hannun YA, Graf R, Clavien PA: **Cationic long-chain ceramide LCL-30 induces cell death by mitochondrial targeting in SW403 cells.** *Molecular Cancer Therapeutics* 2006, **5**(6):1520-1529.
- 208 Beauchamp D, Gourde P, Simard M, Bergeron MG: **Subcellular-Localization of Tobramycin and Vancomycin Given Alone and in Combination in Proximal Tubular Cells, Determined by Immunogold Labeling.** *Antimicrobial Agents and Chemotherapy* 1992, **36**(10):2204-2210.
- 209 Renard C, Vanderhaeghe HJ, Claes PJ, Zenebergh A, Tulkens PM: **Influence of Conversion of Penicillin-G into a Basic Derivative on Its Accumulation and Subcellular-Localization in Cultured Macrophages.** *Antimicrobial Agents and Chemotherapy* 1987, **31**(3):410-416.

210 Takeuchi Y, Ichikawa K, Yonezawa S, Kurohane K, Koishi T, Nango M, Namba Y, Oku N: **Intracellular target for photosensitization in cancer antiangiogenic photodynamic therapy mediated by polycation liposome.** *J Control Release* 2004, **97**(2):231-240.

211 Sibrian-Vazquez M, Nesterova IV, Jensen TJ, Vicente MGH: **Mitochondria targeting by guanidine-and biguanidine-porphyrin photosensitizers.** *Bioconjugate Chemistry* 2008, **19**(3):705-713.

212 Chen Y, Graham A, Potter W, Morgan J, Vaughan L, Bellnier DA, Henderson BW, Oseroff A, Dougherty TJ, Pandey RK: **Bacteriopurpurinimides: highly stable and potent photosensitizers for photodynamic therapy.** *J Med Chem* 2002, **45**(2):255-258

214 Trivedi NS, Wang HW, Nieminen AL, Oleinick NL, Izatt JA: **Quantitative analysis of Pc 4 localization in mouse lymphoma (LY-R) cells via double-label confocal fluorescence microscopy.** *Photochemistry and Photobiology* 2000, **71**(5):634-639.

215 Maisch T, Bosl C, Szeimies RM, Lehn N, Abels C: **Photodynamic effects of novel XF porphyrin derivatives on prokaryotic and eukaryotic cells.** *Antimicrob Agents Chemother* 2005, **49**(4):1542-1552.

216 Mak NK, Li KM, Leung WN, Wong RNS, Huang DP, Lung ML, Lau YK, Chang CK: **Involvement of both endoplasmic reticulum and mitochondria in photokilling of nasopharyngeal carcinoma cells by the photosensitizer Zn-BC-AM.** *Biochemical Pharmacology* 2004, **68**(12):2387-2396.

217 Lo PC, Huang JD, Cheng DYY, Chan EYM, Fong WP, Ko WH, Ng DKP: **New amphiphilic silicon(IV) phthalocyanines as efficient Photosensitizers for photodynamic therapy: Synthesis, photophysical properties, and in vitro photodynamic activities.** *Chemistry-a European Journal* 2004, **10**(19):4831-4838.

218 Rosenfeld A, Morgan J, Goswami LN, Hulchanskyy T, Zheng X, Prasad PN, Seroff A, Pandey RK: **Photosensitizers derived from 13(2) oxo-methyl pyropheophorbide-a: Enhanced effect of indium(III) as a central metal in in vitro and in vivo photosensitizing efficacy.** *Photochemistry and Photobiology* 2006, **82**(3):626-634.

219 Naumovski L, Ramos J, Sirisawad M, Chen J, Thiemann P, Lecane P, Magda D, Wang Z, Cortez C, Boswell G *et al*: **Sapphyrins induce apoptosis in hematopoietic tumor-derived cell lines and show in vivo antitumor activity.** *Molecular Cancer Therapeutics* 2005, **4**(6):968-976.

220 Tirand L, Thomas N, Dodeller M, Dumas D, Frochot C, Maunit B, Guillemain F, Barberi-Heyob M: **Metabolic profile of a peptide-conjugated chlorin-type photosensitizer targeting neuropilin-1: An in vivo and in vitro study.** *Drug Metabolism and Disposition* 2007, **35**(5):806-813.

221 Takayama.S, Ojima Y: **Photosensitizing Activity of Carcinogenic and Noncarcinogenic Polycyclic Hydrocarbons on Cultured Cells.** *Japanese Journal of Genetics* 1969, **44**(4):231-&.

222 Matroule JY, Bonizzi G, Morliere P, Paillous N, Santus R, Bours V, Piette J: **Pyropheophorbide-a methyl ester-mediated photosensitization activates transcription factor NF-kappa B through the interleukin-1 receptor-dependent signaling pathway.** *Journal of Biological Chemistry* 1999, **274**(5):2988-3000.

223 Sayama K, Morishima A, Fujita H, Ito A, Nakamura K, Sasaki M: **Possible targets of sparfloxacin-photosensitization in human buccal mucosa cells as revealed by fluorescence microscopy and microspectrofluorometry.** *Journal of Photopolymer Science and Technology* 2003, **16**(5):655-660.

227 Sharonov GV, Karmakova TA, Kassies R, Pliutinskaya AD, Grin MA, Refregiers M, Yakubovskaya RI, Mironov AF, Maurizot JC, Vigny P *et al*: **Cycloimide bacteriochlorin p derivatives: Photodynamic properties and cellular and tissue distribution.** *Free Radical Biology and Medicine* 2006, **40**(3):407-419.

229 Ohkuma S, Poole B: **Cytoplasmic Vacuolation of Mouse Peritoneal-Macrophages and the Uptake into Lysosomes of Weakly Basic Substances.** *Journal of Cell Biology* 1981, **90**(3):656-664.

230 Barile M, Valenti D, Passarella S, Quagliariello E: **3'-Azido-3'-deoxythymidine uptake into isolated rat liver mitochondria and impairment of ADP/ATP translocator.** *Biochemical Pharmacology* 1997, **53**(7):913-920.

231 Cernay T, Zimmermann HW: **Selective photosensitization of mitochondria by the lipophilic cationic porphyrin POR10.** *Journal of Photochemistry and Photobiology B-Biology* 1996, **34**(2-3):191-196.

235 Feofanov A, Sharonov S, Fleury F, Kudelina I, Nabiev I: **Quantitative confocal spectral imaging analysis of mitoxantrone within living K562 cells: Intracellular accumulation and distribution of monomers, aggregates, naphthoquinoxaline metabolite, and drug-target complexes.** *Biophysical Journal* 1997, **73**(6):3328-3336.

236 Belhoussine R, Morjani H, Millot JM, Sharonov S, Manfait M: **Confocal scanning microspectrofluorometry reveals specific anthracycline accumulation in cytoplasmic organelles of multidrug-resistant cancer cells.** *Journal of Histochemistry & Cytochemistry* 1998, **46**(12):1369-1376.

238 Balaghi M, Pearson WN: **Tissue and Intracellular Distribution of Radioactive Thiamine in Normal and Thiamine-Deficient Rats.** *Journal of Nutrition* 1966, **89**(2):127-&.

240 Safaei R, Katano K, Larson BJ, Samimi G, Holzer AK, Naerdemann W, Tomioka M, Goodman M, Howell SB:



- Intracellular localization and trafficking of fluorescein-labeled cisplatin in human ovarian carcinoma cells.** *Clinical Cancer Research* 2005, **11**(2):756-767.
- 241 Vazifeh D, Bryskier A, Labro MT: **Mechanism underlying levofloxacin uptake by human polymorphonuclear neutrophils.** *Antimicrobial Agents and Chemotherapy* 1999, **43**(2):246-252.
- 242 Suzuki T, Kato Y, Sasabe H, Itose M, Miyamoto G, Sugiyama Y: **Mechanism for the tissue distribution of grepafloxacin, a fluoroquinolone antibiotic, in rats.** *Drug Metabolism and Disposition* 2002, **30**(12):1393-1399.
- 243 Lui A, Lumeng L, Li TK: **Transport of Pyridoxine and Pyridoxal 5'-Phosphate in Isolated Rat-Liver Mitochondria.** *Journal of Biological Chemistry* 1982, **257**(24):4903-4906.
- 244 Bereiter-Hahn J: **Dimethylaminostyrylmethylpyridiniumiodine (daspmi) as a fluorescent probe for mitochondria in situ.** *Biochim Biophys Acta* 1976, **423**(1):1-14.
- 245 Yang H, Wu T, Zhang M, Zhang Z: **A novel photosensitizer, 2-butylamino-2-demethoxy-hypocrellin B (2-BA-2-DMHB) - its photodynamic effects on HeLa cells: efficacy and apoptosis.** *Biochim Biophys Acta* 2001, **1540**(1):22-31.
- 246 Roding J, Naujok A, Zimmermann HW: **Effects of ethidium bromide, tetramethylethidium bromide and betaine B on the ultrastructure of HeLa cell mitochondria in situ. A comparative binding study.** *Histochemistry* 1986, **85**(3):215-222.
- 249 Lucocq J, Warren G, Pryde J: **Okadaic Acid Induces Golgi-Apparatus Fragmentation and Arrest of Intracellular-Transport.** *Journal of Cell Science* 1991, **100**:753-759.
- 250 Via LD, Marini AM, Salerno S, Toninello A: **Mitochondrial permeability transition induced by novel pyridothioopyranopyrimidine derivatives: Potential new antimitochondrial antitumour agents.** *Biochemical Pharmacology* 2006, **72**(12):1657-1667.
- 251 Carreon JR, Stewart KM, Mahon KP, Shin S, Kelley SO: **Cyanine dye conjugates as probes for live cell imaging.** *Bioorganic & Medicinal Chemistry Letters* 2007, **17**(18):5182-5185.
- 252 Schiller CM: **In vitro effects of substituted toluenes on mitochondria isolated from rat liver.** *Biochem Pharmacol* 1980, **29**(18):2485-2489.
- 253 Byczkowski JZ: **The mode of action of p,p'-DDT on mammalian mitochondria.** *Toxicology* 1976, **6**(3):309-314.
- 254 Telles-Pupulin AR, Salgueiro-Pagadigorria CL, Bracht A, Ishii-Iwamoto EL: **Effects of fusaric acid on rat liver mitochondria.** *Comp Biochem Physiol C Pharmacol Toxicol Endocrinol* 1998, **120**(1):43-51.
- 255 Fickweiler S, Abels C, Karrer S, Baumler W, Landthaler M, Hofstadter F, Szeimies RM: **Photosensitization of human skin cell lines by ATMPn (9-acetoxy-2,7,12,17-tetrakis-(beta-methoxyethyl)-porphycene) in vitro: mechanism of action.** *Journal of Photochemistry and Photobiology B-Biology* 1999, **48**(1):27-35.
- 258 Sharma SK, Morrissey AT, Miller GG, Gmeiner WH, Lown JW: **Design, synthesis, and intracellular localization of a fluorescently labeled DNA binding polyamide related to the antibiotic distamycin.** *Bioorganic & Medicinal Chemistry Letters* 2001, **11**(6):769-772.
- 260 Berry JP, Lespinats G, Escaig F, Boumati P, Tlouzeau S, Cavellier JF: **Intracellular localization of drugs in cultured tumor cells by ion microscopy and image processing.** *Histochemistry* 1990, **93**(4):397-400.
- 261 Duvvuri M, Konkar S, Funk RS, Krise JM, Krise JP: **A chemical strategy to manipulate the intracellular localization of drugs in resistant cancer cells.** *Biochemistry* 2005, **44**(48):15743-15749.
- 262 Loesberg C, Van Rooji H, Romijn JC, Smets LA: **Mitochondrial effects of the guanidino group-containing cytostatic drugs, m-iodobenzylguanidine and methylglyoxal bis (guanyldrazone).** *Biochem Pharmacol* 1991, **42**(4):793-798.
- 263 Pandey SK, Zheng X, Morgan J, Missert JR, Liu TH, Shibata M, Bellnier DA, Oseroff AR, Henderson BW, Dougherty TJ *et al*: **Purpurinimide carbohydrate conjugates: effect of the position of the carbohydrate moiety in photosensitizing efficacy.** *Mol Pharm* 2007, **4**(3):448-464.
- 264 Yoshida H, Okumura K, Hori R: **Subcellular distribution of basic drugs accumulated in the isolated perfused lung.** *Pharm Res* 1987, **4**(1):50-53.
- 265 Miniati M, Paci A, Cocci F, Ciarimboli G, Monti S, Pistolesi M: **Mitochondria act as a reservoir for the basic amine HIPDM in the lung.** *European Respiratory Journal* 1996, **9**(11):2306-2312.
- 266 Fellous R, Coulaud D, Elabed I, Roques BP, Lepecq JB, Delain E, Gouyette A: **Cytoplasmic Accumulation of Ditercalinium in Rat Hepatocytes and Induction of Mitochondrial Damage.** *Cancer Research* 1988, **48**(22):6542-6549.
- 267 Salvi M, Brunati AM, Clari G, Toninello A: **Interaction of genistein with the mitochondrial electron transport chain results in opening of the membrane transition pore.** *Biochimica Et Biophysica Acta-Bioenergetics* 2002, **1556**(2-3):187-196.

- 268 Doherty WP, Campbell TC: **Aflatoxin Inhibition of Rat-Liver Mitochondria.** *Chemico-Biological Interactions* 1973, **7**(2):63-77.
- 269 Hayes AW: **Action of Rubratoxin-B on Mouse-Liver Mitochondria.** *Toxicology* 1976, **6**(2):253-261.
- 272 Whitaker JE, Haugland RP, Moore PL, Hewitt PC, Reese M, Haugland RP: **Cascade Blue Derivatives - Water-Soluble, Reactive, Blue Emission Dyes Evaluated as Fluorescent Labels and Tracers.** *Analytical Biochemistry* 1991, **198**(1):119-130.
- 275 Barraja P, Diana P, Montalbano A, Dattolo G, Cirrincione G, Viola G, Vedaldi D, Dall'Acqua F: **Pyrrolo[2,3-h]quinolinones: A new ring system with potent photoantiproliferative activity.** *Bioorganic & Medicinal Chemistry* 2006, **14**(24):8712-8728.
- 277 Tian E, Landowski TH, Stephens OW, Yaccoby S, Barlogie B, Shaughnessy JD: **Ellipticine derivative NSC 338258 represents a potential new antineoplastic agent for the treatment of multiple myeloma.** *Molecular Cancer Therapeutics* 2008, **7**(3):500-509.
- 278 Liu A, Pajkovic N, Pang Y, Zhu DW, Calamini B, Mesecar AL, van Breemen RB: **Absorption and subcellular localization of lycopene in human prostate cancer cells.** *Molecular Cancer Therapeutics* 2006, **5**(11):2879-2885.
- 279 Mistry JS, Jani JP, Morris G, Mujumdar RB, Reynolds IJ, Sebti SM, Lazo JS: **Synthesis and Evaluation of Fluoromycin - a Novel Fluorescence-Labeled Derivative of Talisomycin S10b.** *Cancer Research* 1992, **52**(3):709-718.
- 282 Egorin MJ, Clawson RE, Ross LA, Schlossberger NM, Bachur NR: **Cellular Accumulation and Disposition of Aclacinomycin-A.** *Cancer Research* 1979, **39**(11):4396-4400.
- 283 Noodt BB, Rodal GH, Wainwright M, Peng Q, Horobin R, Nesland JM, Berg K: **Apoptosis induction by different pathways with methylene blue derivative and light from mitochondrial sites in V79 cells.** *International Journal of Cancer* 1998, **75**(6):941-948.
- 286 Barcia-Macay M, Mouaden F, Mingeot-Leclercq MP, Tulkens PM, Van Bambeke F: **Cellular pharmacokinetics of telavancin, a novel lipoglycopeptide antibiotic, and analysis of lysosomal changes in cultured eukaryotic cells (J774 mouse macrophages and rat embryonic fibroblasts).** *J Antimicrob Chemother* 2008, **61**(6):1288-1294.
- 291 Jin L, Millard AC, Wuskell JP, Dong XM, Wu DQ, Clark HA, Loew LM: **Characterization and application of a new optical probe for membrane lipid domains.** *Biophysical Journal* 2006, **90**(7):2563-2575.
- 293 Jilkina O, Kong HJ, Hwi L, Kuzio B, Xiang B, Manley D, Jackson M, Kupriyanov VV: **Interaction of a mitochondrial membrane potential-sensitive dye, rhodamine 800, with rat mitochondria, cells, and perfused hearts.** *Journal of Biomedical Optics* 2006, **11**(1):-.
- 294 Hed J, Dahlgren C, Rundquist I: **A Simple Fluorescence Technique to Stain the Plasma-Membrane of Human-Neutrophils.** *Histochemistry* 1983, **79**(1):105-110.
- 295 Detty MR, Prasad PN, Donnelly DJ, Ohulchanskyy T, Gibson SL, Hilf R: **Synthesis, properties, and photodynamic properties in vitro of heavy-chalcogen analogues of tetramethylrosamine.** *Bioorganic & Medicinal Chemistry* 2004, **12**(10):2537-2544.
- 296 Soultanakis RP, Melamede RJ, Bepalov IA, Wallace SS, Beckman KB, Ames BN, Taatjes DJ, Janssen-Heininger YMW: **Fluorescence detection of 8-oxoguanine in nuclear and mitochondrial DNA of cultured cells using a recombinant Fab and confocal scanning laser microscopy.** *Free Radical Biology and Medicine* 2000, **28**(6):987-998.
- 298 Croe AC, Supino R, Lanza KS, Locatelli D, Baglioni P, Bottiroli G: **Photosensitizer accumulation in spontaneous multidrug resistant cells: a comparative study with Rhodamine 123, Rose Bengal acetate and Photofrin (R).** *Photochemical & Photobiological Sciences* 2002, **1**(1):71-78.
- 299 Patito IA, Rothmann C, Malik Z: **Nuclear transport of photosensitizers during photosensitization and oxidative stress.** *Biology of the Cell* 2001, **93**(5):285-291.
- 301 Nuno Silva J, Haigle J, Tome JP, Neves MG, Tome AC, Maziere JC, Maziere C, Santus R, Cavaleiro JA, Filipe P *et al*: **Enhancement of the photodynamic activity of tri-cationic porphyrins towards proliferating keratinocytes by conjugation to poly-S-lysine.** *Photochem Photobiol Sci* 2006, **5**(1):126-133.
- 302 Ko YJ, Yun KJ, Kang MS, Park J, Lee KT, Park SB, Shin JH: **Synthesis and in vitro photodynamic activities of water-soluble fluorinated tetrapyrrolylporphyrins as tumor photosensitizers.** *Bioorganic & Medicinal Chemistry Letters* 2007, **17**(10):2789-2794.
- 303 Yslas EI, Durantini EN, Rivarola VA: **Zinc-(II) 2,9,16,23-tetrakis (methoxy) phthalocyanine: Potential photosensitizer for use in photodynamic therapy in vitro.** *Bioorganic & Medicinal Chemistry* 2007, **15**(13):4651-4660.
- 306 Chen SR, Gee KR: **Redox-dependent trafficking of 2,3,4,5,6-pentafluorodihydro-tetramethylrosamine, a**

**novel fluorogenic indicator of cellular oxidative activity.** *Free Radical Biology and Medicine* 2000, **28**(8):1266-1278.

308 Hoyer-Hansen M, Bastholm L, Mathiasen IS, Elling F, Jaattela M: **Vitamin D analog EB1089 triggers dramatic lysosomal changes and Beclin 1-mediated autophagic cell death.** *Cell Death and Differentiation* 2005, **12**(10):1297-1309.

309 S. Jones CM, A. Belzacq-Casagrande, C. Brenner and J. Howl: **Mitoparans: mitochondriotoxic cell penetratinb peptides and novel inducer of apoptosis.** In: *the 4th International Peptide Symposium in conjunction with the 7th Australian Peptide Conference and the 2nd Asia-Pacific International Peptide Symposium, 2007: 2007; 2007.*

312 Vickers AEM, Sipes IG, Brendel K: **Metabolism-Related Spectral Characterization and Subcellular-Distribution of Polychlorinated Biphenyl Congeners in Isolated Rat Hepatocytes.** *Biochemical Pharmacology* 1986, **35**(2):297-306.

313 Lottner C, Knuechel R, Bernhardt G, Brunner H: **Distribution and subcellular localization of a water-soluble hematoporphyrin-platinum(II) complex in human bladder cancer cells.** *Cancer Letters* 2004, **215**(2):167-177.

315 Dial LD, Anestis DK, Kennedy SR, Rankin GO: **Tissue distribution, subcellular localization and covalent binding of 2-chloroaniline and 4-chloroaniline in Fischer 344 rats.** *Toxicology* 1998, **131**(2-3):109-119.

316 Choie DD, del Campo AA, Guarino AM: **Subcellular localization of cis-dichlorodiammineplatinum(II) in rat kidney and liver.** *Toxicol Appl Pharmacol* 1980, **55**(2):245-252.

317 Woo YT, Argus MF, Arcos JC: **Tissue and Subcellular-Distribution of Dioxane-H-3 in Rat and Apparent Lack of Microsome-Catalyzed Covalent Binding in Target Tissue.** *Life Sciences* 1977, **21**(10):1447-1456.

319 Saito Y, Fukuhara A, Nishio K, Hayakawa M, Ogawa Y, Sakamoto H, Fujii K, Yoshida Y, Niki E: **Characterization of cellular uptake and distribution of coenzyme Q(10) and vitamin E in PC12 cells.** *J Nutr Biochem* 2008.

322 Ono H, Saito Y, Imai K, Kato M: **Subcellular distribution of di-(2-ethylhexyl)phthalate in rat testis.** *J Toxicol Sci* 2004, **29**(2):113-124

323 Scherer K, Abels C, Baumler W, Ackermann G, Szeimies RM: **Structure-activity relationships of three differently substituted 2,7,12,17-tetrakis-(beta-methoxyethyl) porphycene derivatives in vitro.** *Archives of Dermatological Research* 2004, **295**(12):535-541.

324 Ribou AC, Vigo J, Kohen E, Salmon JM: **Microfluorometric study of oxygen dependence of (1''-pyrene butyl)-2-rhodamine ester probe in mitochondria of living cells.** *Journal of Photochemistry and Photobiology B-Biology* 2003, **70**(2):107-115.

325 O'Malley YQ, Abdalla MY, McCormick ML, Reszka KJ, Denning GM, Britigan BE: **Subcellular localization of Pseudomonas pyocyanin cytotoxicity in human lung epithelial cells.** *American Journal of Physiology-Lung Cellular and Molecular Physiology* 2003, **284**(2):L420-L430.

326 Burger AM, Jenkins TC, Double JA, Bibby MC: **Cellular uptake, cytotoxicity and DNA-binding studies of the novel imidazoacridinone antineoplastic agent C1311.** *British Journal of Cancer* 1999, **81**(2):367-375.

327 Lansiaux A, Tanius F, Mishal Z, Dassonneville L, Kumar A, Stephens CE, Hu QY, Wilson WD, Boykin DW, Bailly C: **Distribution of furamidine analogues in tumor cells: Targeting of the nucleus or mitochondria depending on the amidine substitution.** *Cancer Research* 2002, **62**(24):7219-7229.

328 Cauchon N, Tian H, Langlois R, La Madeleine C, Martin S, Ali H, Hunting D, van Lier JE: **Structure-photodynamic activity relationships of substituted zinc trisulfophthalocyanines.** *Bioconjug Chem* 2005, **16**(1):80-89.

329 Boga C, Puggioli S, Gherpelli M, Farruggia G, Pagnotta E, Masotti L, Neyroz P: **Fluorescein conjugates of 9- and 10-hydroxystearic acids: synthetic strategies, photophysical characterization, and confocal microscopy applications.** *Anal Biochem* 2004, **335**(2):196-209.

330 Liskamp RMJ, Brothman AR, Arcoletto JP, Miller OJ, Weinstein IB: **Cellular Uptake and Localization of Fluorescent Derivatives of Phorbol Ester Tumor Promoters.** *Biochemical and Biophysical Research Communications* 1985, **131**(2):920-927.

331 Londosgagliardi D, Capri M, Aubelsadron G, Maral R: **Subcellular-Localization of Some Anthracycline Derivatives in Ehrlich Ascites Tumor-Cells.** *Biochemical and Biophysical Research Communications* 1980, **97**(2):397-406.

332 Garbo GM: **Purpurins and benzochlorins as sensitizers for photodynamic therapy.** *Journal of Photochemistry and Photobiology B-Biology* 1996, **34**(2-3):109-116.

333 Berridge MV, Tan AS: **Characterization of the Cellular Reduction of 3-(4,5-Dimethylthiazol-2-Yl)-2,5-Diphenyltetrazolium Bromide (Mtt) - Subcellular-Localization, Substrate Dependence, and Involvement**

- of Mitochondrial Electron-Transport in Mtt Reduction.** *Archives of Biochemistry and Biophysics* 1993, **303**(2):474-482.
- 337 Bell RG, Matschin Jt: **Intracellular Distribution of Vitamin K in Rat.** *Biochimica Et Biophysica Acta* 1969, **184**(3):597-&.
- 343 Nair PP, Bucana C: **Intracellular distribution of vitamin D in rat liver.** *Biochim Biophys Acta* 1966, **124**(2):254-259.
- 348 Ban S, Nakagawa H, Suzuki T, Miyata N: **Novel mitochondria-localizing TEMPO derivative for measurement of cellular oxidative stress in mitochondria.** *Bioorg Med Chem Lett* 2007, **17**(7):2055-2058.
- 351 Ghosh SC, Auzenne E, Farquhar D, Klostergaard J: **N,N-Dimethylsphingosine-Coumarin: Synthesis, chemical characterization, and biological evaluation.** *Bioconjugate Chemistry* 2007, **18**(3):731-735.
- 352 Sibirian-Vazquez M, Jensen TJ, Vicente MG: **Porphyrim-retinamides: synthesis and cellular studies.** *Bioconjug Chem* 2007, **18**(4):1185-1193.
- 353 Li HR, Jensen TJ, Fronczek FR, Vicente MGH: **Syntheses and properties of a series of cationic water-soluble phthalocyanines.** *Journal of Medicinal Chemistry* 2008, **51**(3):502-511.
- 354 Sibirian-Vazquez M, Jensen TJ, Hammer RP, Vicente MG: **Peptide-mediated cell transport of water soluble porphyrin conjugates.** *J Med Chem* 2006, **49**(4):1364-1372.
- 355 Dickinson BC, Chang CJ: **A targetable fluorescent probe for imaging hydrogen peroxide in the mitochondria of living cells.** *Journal of the American Chemical Society* 2008, **130**(30):9638-+.
- 357 Amit I, Malik Z, Kessel D: **Photoproduct formation from a zinc benzochlorin iminium salt detected by fluorescence microscopy.** *Photochemistry and Photobiology* 1999, **69**(6):700-702.
- 358 Cappelli A, Mancini A, Sudati F, Valenti S, Anzini M, Belloli S, Moresco RM, Matarrese M, Vaghi M, Fabro A *et al*: **Synthesis and biological characterization of novel 2-quinolinecarboxamide ligands of the peripheral benzodiazepine receptors bearing technetium-99m or rhenium.** *Bioconjug Chem* 2008, **19**(6):1143-1153.
- 359 Sekimata K, Hatano K, Ogawa M, Abe J, Magata Y, Biggio G, Serra M, Laquintana V, Denora N, Latrofa A *et al*: **Radiosynthesis and in vivo evaluation of N-[11C]methylated imidazopyridineacetamides as PET tracers for peripheral benzodiazepine receptors.** *Nucl Med Biol* 2008, **35**(3):327-334.
- 362 Vin V, Leducq N, Bono F, Herbert JM: **Binding characteristics of SSR180575, a potent and selective peripheral benzodiazepine ligand.** *Biochemical and Biophysical Research Communications* 2003, **310**(3):785-790.
- 365 Okuyama S, Chaki S, Yoshikawa R, Ogawa S, Suzuki Y, Okubo T, Nakazato A, Nagamine M, Tomisawa K: **Neuropharmacological profile of peripheral benzodiazepine receptor agonists, DAA1097 and DAA1106.** *Life Sci* 1999, **64**(16):1455-1464.
- 366 Campiani G, Nacci V, Fiorini I, De Filippis MP, Garofalo A, Ciani SM, Greco G, Novellino E, Williams DC, Zisterer DM *et al*: **Synthesis, biological activity, and SARs of pyrrolobenzoxazepine derivatives, a new class of specific "peripheral-type" benzodiazepine receptor ligands.** *J Med Chem* 1996, **39**(18):3435-3450.
- 368 Nepomuceno MF, Mamede MED, de Macedo DV, Alves AA, Pereira-da-Silva L, Tabak M: **Antioxidant effect of dipyrindamole and its derivative RA-25 in mitochondria: correlation of activity and location in the membrane.** *Biochimica Et Biophysica Acta-Biomembranes* 1999, **1418**(2):285-294.
- 370 Davies LP, Barlin GB, Selley ML: **New Imidazo[1,2-(B)under-Bar]Pyridazine Ligands for Peripheral-Type Benzodiazepine Receptors on Mitochondria and Monocytes.** *Life Sciences* 1995, **57**(25):P1381-P1386.
- 372 Davia K, King D, Hong YL, Swavey S: **A porphyrin-ruthenium photosensitizer as a potential photodynamic therapy agent.** *Inorganic Chemistry Communications* 2008, **11**(5):584-586.
- 373 Laquintana V, Denora N, Lopedota A, Suzuki H, Sawada M, Serra M, Biggio G, Latrofa A, Trapani G, Liso G: **N-benzyl-2-(6,8-dichloro-2-(4-chlorophenyl)imidazo[1,2-a]pyridin-3-yl)-N-(6-(7-nitrobenzo[c][1,2,5]oxadiazol-4-ylamino)hexyl)acetamide as a new fluorescent probe for peripheral benzodiazepine receptor and microglial cell visualization.** *Bioconjugate Chemistry* 2007, **18**(5):1397-1407.
- 376 Machado AHA, Braga FMP, Soares CP, Pelisson MMM, Beltrame M, Da Silva NS: **Photodynamic therapy with a new photosensitizing agent.** *Photomedicine and Laser Surgery* 2007, **25**(3):220-228.
- 378 Sibirian-Vazquez M, Jensen TJ, Vicente MGH: **Synthesis, characterization, and metabolic stability of porphyrin-peptide conjugates bearing bifunctional signaling sequences.** *Journal of Medicinal Chemistry* 2008, **51**(10):2915-2923.
- 379 Hofman JW, van Zeeland F, Turker S, Talsma H, Lambrechts SAG, Sakharov DV, Hennink WE, van Nostrum CF: **Peripheral and axial substitution of phthalocyanines with solketal groups: Synthesis and in vitro evaluation for photodynamic therapy.** *Journal of Medicinal Chemistry* 2007, **50**(7):1485-1494.
- 380 Liu W, Jensen TJ, Fronczek FR, Hammer RP, Smith KM, Vicente MG: **Synthesis and cellular studies of nonaggregated water-soluble phthalocyanines.** *J Med Chem* 2005, **48**(4):1033-1041.

382 Liu JY, Jiang XJ, Fong WP, Ng DK: **Synthesis, Characterization, and In Vitro Photodynamic Activity of Novel Amphiphilic Zinc(II) Phthalocyanines Bearing Oxyethylene-Rich Substituents.** *Met Based Drugs* 2008, **2008**:284691.

383 Zhou WL, Yan P, Wuskell JP, Loew LM, Antic SD: **Intracellular long-wavelength voltage-sensitive dyes dynamics of action potentials in axons and thin for studying the dendrites.** *Journal of Neuroscience Methods* 2007, **164**(2):225-239.

384 Matiukas A, Mitrea BG, Pertsov AM, Wuskell JP, Wei MD, Watras J, Millard AC, Loew LM: **New near-infrared optical probes of cardiac electrical activity.** *American Journal of Physiology-Heart and Circulatory Physiology* 2006, **290**(6):H2633-H2643.

385 Wuskell JP, Boudreau D, Wei MD, Jin L, Engl R, Chebolu R, Bullen A, Hoffacker KD, Kerimo J, Cohen LB *et al*: **Synthesis, spectra, delivery and potentiometric responses of new styryl dyes with extended spectral ranges.** *Journal of Neuroscience Methods* 2006, **151**(2):200-215.

387 Sibrian-Vazquez M, Jensen TJ, Fronczek FR, Hammer RP, Vicente MGH: **Synthesis and characterization of positively charged porphyrin-peptide conjugates.** *Bioconjugate Chemistry* 2005, **16**(4):852-863.

388 Yang YJ, Lowry M, Xu XY, Escobedo JO, Sibrian-Vazquez M, Wong L, Schowalter CM, Jensen TJ, Fronczek FR, Warner IM *et al*: **Seminaphthofluorones are a family of water-soluble, low molecular weight, NIR-emitting fluorophores.** *Proceedings of the National Academy of Sciences of the United States of America* 2008, **105**(26):8829-8834.

393 Sibrian-Vazquez M, Jensen TJ, Vicente MGH: **Synthesis and cellular studies of PEG-functionalized meso-tetraphenylporphyrins.** *Journal of Photochemistry and Photobiology B-Biology* 2007, **86**(1):9-21.

399 Comuzzi C, Cogoi S, Overhand M, Van der Marel GA, Overkleeft HS, Xodo LE: **Synthesis and biological evaluation of new pentaphyrin macrocycles for photodynamic therapy.** *J Med Chem* 2006, **49**(1):196-204.

400 Mak NK, Kok TW, Wong RNS, Lam SW, Lau YK, Leung WN, Cheung NH, Huang DP, Yeung LL, Chang CK: **Photodynamic activities of sulfonamide derivatives of porphycene on nasopharyngeal carcinoma cells.** *Journal of Biomedical Science* 2003, **10**(4):418-429.

403 Hammer ND, Lee S, Vesper BJ, Elseth KM, Hoffman BM, Barrett AG, Radosevich JA: **Charge dependence of cellular uptake and selective antitumor activity of porphyrazines.** *J Med Chem* 2005, **48**(26):8125-8133.

405 Laville I, Figueiredo T, Looock B, Pigaglio S, Maillard P, Grierson DS, Carrez D, Croisy A, Blais J: **Synthesis, cellular internalization and photodynamic activity of glucoconjugated derivatives of tri and tetra(meta-hydroxyphenyl)chlorins.** *Bioorg Med Chem* 2003, **11**(8):1643-1652.

407 Gallagher WM, Allen LT, O'Shea C, Kenna T, Hall M, Gorman A, Killoran J, O'Shea DF: **A potent nonporphyrin class of photodynamic therapeutic agent: cellular localisation, cytotoxic potential and influence of hypoxia.** *Br J Cancer* 2005, **92**(9):1702-1710.

409 Laville I, Pigaglio S, Blais JC, Doz F, Looock B, Maillard P, Grierson DS, Blais J: **Photodynamic efficiency of diethylene glycol-linked glycoconjugated porphyrins in human retinoblastoma cells.** *J Med Chem* 2006, **49**(8):2558-2567.

410 Lee S, Vesper BJ, Zong H, Hammer ND, Elseth KM, Barrett AG, Hoffman BM, Radosevich JA: **Synthesis and Biological Analysis of Thiotetra(ethylene glycol) monomethyl Ether-Functionalized Porphyrazines: Cellular Uptake and Toxicity Studies.** *Met Based Drugs* 2008, **2008**:391418.

411 Antic S, Zecevic D: **Optical signals from neurons with internally applied voltage-sensitive dyes.** *J Neurosci* 1995, **15**(2):1392-1405.

412 Bullen A, Saggau P: **High-speed, random-access fluorescence microscopy: II. Fast quantitative measurements with voltage-sensitive dyes.** *Biophys J* 1999, **76**(4):2272-2287.

413 Obaid AL, Loew LM, Wuskell JP, Salzberg BM: **Novel naphthylstyryl-pyridium potentiometric dyes offer advantages for neural network analysis.** *J Neurosci Methods* 2004, **134**(2):179-190.

414 Fromherz P, Hubener G, Kuhn B, Hinner MJ: **ANNINE-6plus, a voltage-sensitive dye with good solubility, strong membrane binding and high sensitivity.** *Eur Biophys J* 2008, **37**(4):509-514.

415 Kuhn B, Fromherz P: **Anellated hemicyanine dyes in a neuron membrane: Molecular Stark effect and optical voltage recording.** *Journal of Physical Chemistry B* 2003, **107**(31):7903-7913.

417 Yang YJ, Lowry M, Schowalter CM, Fakayode SO, Escobedo JO, Xu XY, Zhang HT, Jensen TJ, Fronczek FR, Warner IM *et al*: **An organic white light-emitting fluorophore.** *Journal of the American Chemical Society* 2006, **128**(43):14081-14092.

418 Rahimipour S, Litichever-Coslovsky N, Alaluf M, Freeman D, Ehrenberg B, Weiner L, Mazur Y, Fridkin M, Koch Y: **Novel methyl helianthrones as photosensitizers: Synthesis and biological evaluation.** *Photochemistry and Photobiology* 2005, **81**(2):250-258.

421 Wang Y, Zhang Y, Yu B: **The cytotoxicity of saponins correlates with their cellular internalization.**

*ChemMedChem* 2007, **2**(3):288-291.

422 Hirohara S, Obata M, Ogata S, Kajiwara K, Ohtsuki C, Tanihara M, Yano S: **Sugar-dependent aggregation of glycoconjugated chlorins and its effect on photocytotoxicity in HeLa cells.** *Journal of Photochemistry and Photobiology B-Biology* 2006, **84**(1):56-63.

423 Schweitzer D, Zhu J, Jarori G, Tanaka J, Higa T, Davisson VJ, Helquist P: **Synthesis of carbamate derivatives of iejimalides. Retention of normal antiproliferative activity and localization of binding in cancer cells.** *Bioorganic & Medicinal Chemistry* 2007, **15**(9):3208-3216.

424 Guan HJ, Liu XD, Peng WL, Cao RH, Ma Y, Chen HS, Xu AL: **beta-carboline derivatives: Novel photosensitizers that intercalate into DNA to cause direct DNA damage in photodynamic therapy.** *Biochemical and Biophysical Research Communications* 2006, **342**(3):894-901.

425 Schmitt F, Govindaswamy P, Suss-Fink G, Ang WH, Dyson PJ, Juillerat-Jeanneret L, Therrien B: **Ruthenium porphyrin compounds for photodynamic therapy of cancer.** *Journal of Medicinal Chemistry* 2008, **51**(6):1811-1816.

426 Bourre L, Simonneaux G, Ferrand Y, Thibaut S, Lajat Y, Patrice T: **Synthesis, and in vitro and in vivo evaluation of a diphenylchlorin sensitizer for photodynamic therapy.** *J Photochem Photobiol B* 2003, **69**(3):179-192.

427 Lo PC, Chan CMH, Liu JY, Fong WP, Ng DKP: **Highly photocytotoxic glucosylated silicon(IV) phthalocyanines. Effects of peripheral chloro substitution on the photophysical and photodynamic properties.** *Journal of Medicinal Chemistry* 2007, **50**(9):2100-2107.

428 Xu H, Jiang XJ, Chan EY, Fong WP, Ng DK: **Synthesis, photophysical properties and in vitro photodynamic activity of axially substituted subphthalocyanines.** *Org Biomol Chem* 2007, **5**(24):3987-3992.

429 Grichine A, Feofanov A, Karmakova T, Kazachkina N, Pecherskih E, Yakubovskaya R, Mironov A, Egret-Charlier M, Vigny P: **Influence of the substitution of 3-vinyl by 3-formyl group on the photodynamic properties of chlorin P6: Molecular, cellular and in vivo studies.** *Photochemistry and Photobiology* 2001, **73**(3):267-277.

431 Su TL, Lin CT, Chen CH, Huang HM: **Synthesis of biotinylated glyfoline for immunoelectron microscopic localization.** *Bioconjugate Chemistry* 2000, **11**(2):278-281.

436 Kramer-Marek G, Serpa C, Szurko A, Widel M, Sochanik A, Snietura M, Kus P, Nunes RMD, Arnaut LG, Ratuszna A: **Spectroscopic properties and photodynamic effects of new lipophilic porphyrin derivatives: Efficacy, localisation and cell death pathways (vol 84, pg 1, 2006).** *Journal of Photochemistry and Photobiology B-Biology* 2006, **85**(3):228-228.

437 Slaninova I, Slanina J, Taborska E: **Quaternary benzo[c]phenanthridine alkaloids--novel cell permeant and red fluorescing DNA probes.** *Cytometry A* 2007, **71**(9):700-708.

439 Kralova J, Koivukorpi J, Kejik Z, Pouckova P, Sievanen E, Kolehmainen E, Kral V: **Porphyrin-bile acid conjugates: from saccharide recognition in the solution to the selective cancer cell fluorescence detection.** *Org Biomol Chem* 2008, **6**(9):1548-1552.

442 Lo PC, Zhao B, Duan W, Fong WP, Ko WH, Ng DK: **Synthesis and in vitro photodynamic activity of mono-substituted amphiphilic zinc(II) phthalocyanines.** *Bioorg Med Chem Lett* 2007, **17**(4):1073-1077.

443 Alvarez MG, Principe F, Milanese ME, Durantini EN, Rivarola V: **Photodynamic damages induced by a monocationic porphyrin derivative in a human carcinoma cell line.** *Int J Biochem Cell Biol* 2005, **37**(12):2504-2512.

444 Gryshuk AL, Chen Y, Potter W, Ohulchansky T, Oseroff A, Pandey RK: **In vivo stability and photodynamic efficacy of fluorinated bacteriopurpurinimides derived from bacteriochlorophyll-a.** *J Med Chem* 2006, **49**(6):1874-1881.

448 Lala AK: **Fluorescent and photoactivable probes in depth-dependent analysis of membranes.** *Chem Phys Lipids* 2002, **116**(1-2):177-188.

449 Lavis LD, Chao TY, Raines RT: **Fluorogenic label for biomolecular imaging.** *ACS Chem Biol* 2006, **1**(4):252-260.

452 Farruggia G, Iotti S, Prodi L, Montalti M, Zaccheroni N, Savage PB, Trapani V, Sale P, Wolf FI: **8-Hydroxyquinoline derivatives as fluorescent sensors for magnesium in living cells.** *Journal of the American Chemical Society* 2006, **128**(1):344-350.

455 Petteerse,Je, Aas M: **Subcellular-Localization of Hexadecanedioic Acid Activation in Human Liver.** *Journal of Lipid Research* 1974, **15**(6):551-556.

456 Ribou AC, Vigo J, Salmon JM: **Lifetime of fluorescent pyrene butyric acid probe in single living cells for measurement of oxygen fluctuation.** *Photochem Photobiol* 2004, **80**(2):274-280.

458 Burdette SC, Walkup GK, Spingler B, Tsien RY, Lippard SJ: **Fluorescent sensors for Zn(2+) based on a**

- fluorescein platform: synthesis, properties and intracellular distribution.** *J Am Chem Soc* 2001, **123**(32):7831-7841.
- 462 Salama G, Choi BR, Azour G, Lavasani M, Tumbav V, Salzberg BM, Patrick MJ, Ernst LA, Waggoner AS: **Properties of new, long-wavelength, voltage-sensitive dyes in the heart.** *J Membr Biol* 2005, **208**(2):125-140.
- 463 Ehrenberg B, Montana V, Wei MD, Wuskell JP, Loew LM: **Membrane-Potential Can Be Determined in Individual Cells from the Nernstian Distribution of Cationic Dyes.** *Biophysical Journal* 1988, **53**(5):785-794.
- 464 Grinvald A, Salzberg BM, Levram V, Hildesheim R: **Optical-Recording of Synaptic Potentials from Processes of Single Neurons Using Intracellular Potentiometric Dyes.** *Biophysical Journal* 1987, **51**(4):643-651.
- 465 Bouevitch O, Lewis A, Pinevsky I, Wuskell JP, Loew LM: **Probing membrane potential with nonlinear optics.** *Biophys J* 1993, **65**(2):672-679.
- 466 Shynkar VV, Klymchenko AS, Duportail G, Demchenko AP, Mely Y: **Two-color fluorescent probes for imaging the dipole potential of cell plasma membranes.** *Biochimica Et Biophysica Acta-Biomembranes* 2005, **1712**(2):128-136.
- 468 Lee PPS, Lo PC, Chan EYM, Fong WP, Ko WH, Ng DKP: **Synthesis and in vitro photodynamic activity of novel galactose-containing phthalocyanines.** *Tetrahedron Letters* 2005, **46**(9):1551-1554.
- 470 Camerin M, Rello S, Villanueva A, Ping XZ, Kenney ME, Rodgers MAJ, Jori G: **Photothermal sensitisation as a novel therapeutic approach for tumours: Studies at the cellular and animal level.** *European Journal of Cancer* 2005, **41**(8):1203-1212.
- 471 Kozikowski AP, Kotoula M, Ma D, Boujrad N, Tuckmantel W, Papadopoulos V: **Synthesis and biology of a 7-nitro-2,1,3-benzoxadiazol-4-yl derivative of 2-phenylindole-3-acetamide: a fluorescent probe for the peripheral-type benzodiazepine receptor.** *J Med Chem* 1997, **40**(16):2435-2439.
- 472 Lansiaux A, Dassonneville L, Facompre M, Kumar A, Stephens CE, Bajic M, Tanious F, Wilson WD, Boykin DW, Bailly C: **Distribution of furamidine analogues in tumor cells: influence of the number of positive charges.** *J Med Chem* 2002, **45**(10):1994-2002.
- 473 Serafim TL, Oliveira PJ, Sardao VA, Perkins E, Parke D, Holy J: **Different concentrations of berberine result in distinct cellular localization patterns and cell cycle effects in a melanoma cell line.** *Cancer Chemotherapy and Pharmacology* 2008, **61**(6):1007-1018.
- 474 Tarasiuk J, Stefanska B, Plodzich I, Tkaczyk-Gobis K, Seksek O, Martelli S, Garnier-Suillerot A, Borowski E: **Anthrapyridones, a novel group of antitumour non-cross resistant anthraquinone analogues. Synthesis and molecular basis of the cytotoxic activity towards K562/DOX cells.** *British Journal of Pharmacology* 2002, **135**(6):1513-1523.
- 475 Satz AL, White CM, Beerman TA, Bruice TC: **Double-stranded DNA binding characteristics and subcellular distribution of a minor groove binding diphenyl ether bisbenzimidazole.** *Biochemistry* 2001, **40**(21):6465-6474.
- 477 Lichtner RB, Rotgeri A, Bunte T, Buchmann B, Hoffmann J, Schwede W, Skuballa W, Klar U: **Subcellular distribution of epothilones in human tumor cells.** *Proc Natl Acad Sci U S A* 2001, **98**(20):11743-11748.
- 478 Charmantray F, Demeunynck M, Carrez D, Croisy A, Lansiaux A, Bailly C, Colson P: **4-Hydroxymethyl-3-aminoacridine derivatives as a new family of anticancer agents.** *J Med Chem* 2003, **46**(6):967-977.
- 479 Pavlov V, Kong Thoo Lin P, Rodilla V: **Cytotoxicity, DNA binding and localisation of novel bis-naphthalimidopropyl polyamine derivatives.** *Chem Biol Interact* 2001, **137**(1):15-24.
- 480 Belitsky JM, Leslie SJ, Arora PS, Beerman TA, Dervan PB: **Cellular uptake of N-methylpyrrole/N-methylimidazole polyamide-dye conjugates.** *Bioorganic & Medicinal Chemistry* 2002, **10**(10):3313-3318.
- 481 Wells G, Martin CRH, Howard PW, Sands ZA, Loughton CA, Tiberghien A, Woo CK, Masterson LA, Stephenson MJ, Hartley JA *et al*: **Design, synthesis, and biophysical and biological evaluation of a series of Pyrrolobenzodiazepine - Poly(N-methylpyrrole) conjugates.** *Journal of Medicinal Chemistry* 2006, **49**(18):5442-5461.
- 485 Mol WEM, Meijer DKF: **Hepatic Transport Mechanisms for Bivalent Organic Cations - Subcellular-Distribution and Hepatobiliary Concentration Gradients of Some Steroidal Muscle-Relaxants.** *Biochemical Pharmacology* 1990, **39**(2):383-390.
- 486 Nickols NG, Jacobs CS, Farkas ME, Dervan PB: **Improved nuclear localization of DNA-binding polyamides.** *Nucleic Acids Research* 2007, **35**(2):363-370.
- 488 Bickmeyer U, Grube A, Klings KW, Kock M: **Ageladine A, a pyrrole-imidazole alkaloid from marine sponges, is a pH sensitive membrane permeable dye (vol 373, pg 419, 2008).** *Biochemical and Biophysical Research Communications* 2009, **383**(4):519-519.

492 Gogan P, Schmiedeljakob I, Chitti Y, Tycdumont S: **Fluorescence Imaging of Local Membrane Electric-  
Fields during the Excitation of Single Neurons in Culture.** *Biophysical Journal* 1995, **69**(2):299-310.

495 Mottram LF, Maddox E, Schwab M, Beaufils F, Peterson BR: **A concise synthesis of the Pennsylvania Green  
fluorophore and labeling of intracellular targets with O6-benzylguanine derivatives.** *Org Lett* 2007,  
**9**(19):3741-3744.

498 Mottram LF, Boonyarattanakalin S, Kovel RE, Peterson BR: **The Pennsylvania Green Fluorophore: a hybrid  
of Oregon Green and Tokyo Green for the construction of hydrophobic and pH-insensitive molecular  
probes.** *Org Lett* 2006, **8**(4):581-584.

499 Chauvin AS, Comby S, Song B, Vandevyver CD, Thomas F, Bunzli JC: **A polyoxyethylene-substituted  
bimetallic europium helicate for luminescent staining of living cells.** *Chemistry* 2007, **13**(34):9515-9526.

500 Galindo F, Burguete MI, Vigara L, Luis SV, Kabir N, Gavrilovic J, Russell DA: **Synthetic macrocyclic  
peptidomimetics as tunable pH probes for the fluorescence imaging of acidic organelles in live cells.**  
*Angewandte Chemie-International Edition* 2005, **44**(40):6504-6508.

502 Abbotto A, Baldini G, Beverina L, Chirico G, Collini M, D'Alfonso L, Diaspro A, Magrassi R, Nardo L, Pagani  
GA: **Dimethyl-pepep: a DNA probe in two-photon excitation cellular imaging.** *Biophysical Chemistry* 2005,  
**114**(1):35-41.

503 Allain C, Schmidt F, Lartia R, Bordeau G, Fiorini-Debuisschert C, Charra F, Tauc P, Teulade-Fichou MP:  
**Vinyl-pyridinium triphenylamines: Novel far-red emitters with high photostability and two-photon  
absorption properties for staining DNA.** *Chembiochem* 2007, **8**(4):424-433.

506 Li C, Greenwood TR, Bhujwalla ZM, Glunde K: **Synthesis and characterization of glucosamine-bound near-  
infrared probes for optical imaging.** *Organic Letters* 2006, **8**(17):3623-3626.

507 Beverina L, Crippa M, Landenna M, Ruffo R, Salice P, Silvestri F, Versari S, Villa A, Ciaffoni L, Collni E *et al*:  
**Assessment of water-soluble pi-extended squaraines as one- and two-photon singlet oxygen  
photosensitizers: Design, synthesis, and characterization.** *Journal of the American Chemical Society* 2008,  
**130**(6):1894-1902.

510 Jaffrezou JP, Chen G, Duran GE, Muller C, Bordier C, Laurent G, Sikic BI, Levade T: **Inhibition of Lysosomal  
Acid Sphingomyelinase by Agents Which Reverse Multidrug-Resistance.** *Biochimica Et Biophysica Acta-  
Molecular Cell Research* 1995, **1266**(1):1-8.

512 Van Bambeke F, Gerbaux C, Michot JM, d'Yvoire MB, Montenez JP, Tulkens PM: **Lysosomal alterations  
induced in cultured rat fibroblasts by long-term exposure to low concentrations of azithromycin.** *J  
Antimicrob Chemother* 1998, **42**(6):761-767.

513 Hjelle JT, Ruben Z: **Investigations in Intracellular Drug Storage - Localization of Disobutamide in  
Lysosomal and Nonlysosomal Vesicles.** *Toxicology and Applied Pharmacology* 1989, **101**(1):70-82.

516 Dastur DK, Thakkar BK, Desai PR: **Experimental Neurotoxicity of the Anorectic Fenfluramine .1. A Fine-  
Structural Model for Cerebral Lysosomal Storage and Neuroglial Reaction.** *Acta Neuropathologica* 1985,  
**67**(1-2):142-154.

517 Bispinck F, Fischer J, Lullmann-Rauch R, Ziegenhagen MW: **Time course of the tilorone-induced lysosomal  
accumulation of sulphated glycosaminoglycans in cultured fibroblasts.** *Experimental and Toxicologic  
Pathology* 1998, **50**(4-6):411-415.

518 Bispinck F, Fischer J, Lullmann-Rauch R, von Witzendorff B: **Lysosomal glycosaminoglycan storage as  
induced by dicationic amphiphilic drugs: Investigation into the mechanisms underlying the slow  
reversibility.** *Toxicology* 1998, **128**(2):91-100.

520 Soule JC, Neale G, Peters TJ: **Functional and Biochemical Evidence of Damage to Enterocytes Induced by  
Triparanol - Role of Lysosomes and Effect of a Gluten-Free Diet.** *Clinical Science and Molecular Medicine*  
1976, **51**(1):19-25.

521 Agoston M, Orsi F, Feher E, Hagymasi K, Orosz Z, Blazovics A, Feher J, Vereckei A: **Silymarin and vitamin  
E reduce amiodarone-induced lysosomal phospholipidosis in rats.** *Toxicology* 2003, **190**(3):231-241.

522 Ni-Komatsu L, Orlow SJ: **Chemical genetic screening identifies tricyclic compounds that decrease cellular  
melanin content.** *Journal of Investigative Dermatology* 2008, **128**(5):1236-1247.

523 Staubli W, Schweizer W, Suter J: **Some Properties of Myeloid Bodies Induced in Rat-Liver by an  
Antidepressant Drug (Maprotiline).** *Experimental and Molecular Pathology* 1978, **28**(2):177-195.

527 Sherer TB, Betarbet R, Greenamyre JT: **Environment, mitochondria, and Parkinson's disease.** *Neuroscientist*  
2002, **8**(3):192-197.

529 Krogstad DJ, Schlesinger PH, Gluzman IY: **Antimalarials Increase Vesicle Ph in Plasmodium-Falciparum.**  
*Journal of Cell Biology* 1985, **101**(6):2302-2309.

530 Glaumann H, Motakefi AM, Jansson H: **Intracellular distribution and effect of the antimalarial drug**



**mefloquine on lysosomes of rat liver.** *Liver* 1992, **12**(4 Pt 1):183-190.

532 Li GL, Graham A, Chen YH, Dobhal MP, Morgan J, Zheng G, Kozyrev A, Oseroff A, Dougherty TJ, Pandey RK: **Synthesis, comparative photosensitizing efficacy, human serum albumin (Site II) binding ability, and intracellular localization characteristics of novel benzobacteriochlorins derived from vic-dihydroxybacteriochlorins.** *Journal of Medicinal Chemistry* 2003, **46**(25):5349-5359.

533 Houghton PJ, Sosinski J, Thakar JH, Boder GB, Grindey GB: **Characterization of the Intracellular-Distribution and Binding in Human Adenocarcinoma Cells of N-(4-Azidophenylsulfonyl)-N'-(4-Chlorophenyl)Urea (Ly219703), a Photoaffinity Analog of the Antitumor Diarylsulfonylurea Sulofenur.** *Biochemical Pharmacology* 1995, **49**(5):661-668.

534 Albert AE, Warwick GP: **The subcellular distribution of tritiated 4-dimethylaminoazobenzene and 2-methyl-4-dimethylaminoazobenzene in rat liver and spleen following a single oral administration.** *Chem Biol Interact* 1972, **5**(1):65-68.

535 Berson A, Descatoire V, Sutton A, Fau D, Maulny B, Vadrot N, Feldmann G, Berthon B, Tordjmann T, Pessayre D: **Toxicity of alpidem, a peripheral benzodiazepine receptor ligand, but not zolpidem, in rat hepatocytes: Role of mitochondrial permeability transition and metabolic activation.** *Journal of Pharmacology and Experimental Therapeutics* 2001, **299**(2):793-800.

536 Choi CF, Huang JD, Lo PC, Fong WP, Ng DKP: **Glycosylated zinc(II) phthalocyanines as efficient photosensitisers for photodynamic therapy. Synthesis, photophysical properties and in vitro photodynamic activity.** *Organic & Biomolecular Chemistry* 2008, **6**(12):2173-2181.

537 Chen Y, Zheng X, Dobhal MP, Gryshuk A, Morgan J, Dougherty TJ, Oseroff A, Pandey RK: **Methyl pyropheophorbide-a analogues: potential fluorescent probes for the peripheral-type benzodiazepine receptor. Effect of central metal in photosensitizing efficacy.** *J Med Chem* 2005, **48**(11):3692-3695.

538 Lo PC, Fong WP, Ng DK: **Effects of peripheral chloro substitution on the photophysical properties and in vitro photodynamic activities of galactose-conjugated silicon(IV) phthalocyanines.** *ChemMedChem* 2008, **3**(7):1110-1117.

539 Phelps MA, Foraker AB, Gao W, Dalton JT, Swaan PW: **A novel rhodamine-riboflavin conjugate probe exhibits distinct fluorescence resonance energy transfer that enables riboflavin trafficking and subcellular localization studies.** *Mol Pharm* 2004, **1**(4):257-266.

540 Rancan F, Wiehe A, Nobel M, Senge MO, Omari SA, Bohm F, John M, Roder B: **Influence of substitutions on asymmetric dihydroxychlorins with regard to intracellular uptake, subcellular localization and photosensitization of Jurkat cells.** *J Photochem Photobiol B* 2005, **78**(1):17-28.

542 Yan X, Grace WK, Yoshida TM, Habbersett RC, Velappan N, Jett JH, Keller RA, Marrone BL: **Characteristics of different nucleic acid staining dyes for DNA fragment sizing by flow cytometry.** *Anal Chem* 1999, **71**(24):5470-5480.

576 Jayaraman S: **Flow cytometric determination of mitochondrial membrane potential changes during apoptosis of T lymphocytic and pancreatic beta cell lines: comparison of tetramethylrhodamineethyl ester (TMRE), chloromethyl-X-rosamine (H2-CMX-Ros) and MitoTracker Red 580 (MTR580).** *J Immunol Methods* 2005, **306**(1-2):68-79.

577 Whitaker JE, Moore PL, Haugland RP: **Dihydrotetramethylrosamine: a long wavelength, fluorogenic peroxidase substrate evaluated in vitro and in a model phagocyte.** *Biochem Biophys Res Commun* 1991, **175**(2):387-393.

578 Kweon SM, Kim HJ, Lee ZW, Kim SJ, Kim SI, Paik SG, Ha KS: **Real-time measurement of intracellular reactive oxygen species using mito tracker orange (CMH(2)TMRos).** *Bioscience Reports* 2001, **21**(3):341-352.

579 Scorrano L, Petronilli V, Colonna R, Di Lisa F, Bernardi P: **Interactions of chloromethyltetramethylrosamine (MitoTracker Orange) with isolated mitochondria and intact cells.** *Ann N Y Acad Sci* 1999, **893**:391-395.

580 Li Y, Stansbury KH, Zhu H, Trush MA: **Biochemical characterization of lucigenin (Bis-N-methylacridinium) as a chemiluminescent probe for detecting intramitochondrial superoxide anion radical production.** *Biochem Biophys Res Commun* 1999, **262**(1):80-87.

582 Galluzzi L, Zamzami N, de La Motte Rouge T, Lemaire C, Brenner C, Kroemer G: **Methods for the assessment of mitochondrial membrane permeabilization in apoptosis.** *Apoptosis* 2007, **12**(5):803-813.

583 Rashid F, Horobin RW, Williams MA: **Predicting the behaviour and selectivity of fluorescent probes for lysosomes and related structures by means of structure-activity models.** *Histochem J* 1991, **23**(10):450-459.

584 Halle A, Hornung V, Petzold GC, Stewart CR, Monks BG, Reinheckel T, Fitzgerald KA, Latz E, Moore KJ, Golenbock DT: **The NALP3 inflammasome is involved in the innate immune response to amyloid-beta.** *Nature Immunology* 2008, **9**(8):857-865.

585 Lu W, Sun Q, Wan J, She ZJ, Jiang XG: **Cationic albumin-conjugated pegylated nanoparticles allow gene delivery into brain tumors via intravenous administration.** *Cancer Research* 2006, **66**(24):11878-11887.

586 Mironov SL, Ivannikov MV, Johansson M: **[Ca<sup>2+</sup>]<sub>i</sub> signaling between mitochondria and endoplasmic reticulum in neurons is regulated by microtubules - From mitochondrial permeability transition pore to Ca<sup>2+</sup>-induced Ca<sup>2+</sup> release.** *Journal of Biological Chemistry* 2005, **280**(1):715-721.

588 Pagano RE, Watanabe R, Wheatley C, Chen CS: **Use of N-[5-(5,7-dimethyl boron dipyrromethene difluoride)-sphingomyelin to study membrane traffic along the endocytic pathway.** *Chemistry and Physics of Lipids* 1999, **102**(1-2):55-63.

589 Davenport L, Dale RE, Bisby RH, Cundall RB: **Transverse location of the fluorescent probe 1,6-diphenyl-1,3,5-hexatriene in model lipid bilayer membrane systems by resonance excitation energy transfer.** *Biochemistry* 1985, **24**(15):4097-4108.

590 Kaiser RD, London E: **Determination of the depth of BODIPY probes in model membranes by parallax analysis of fluorescence quenching.** *Biochim Biophys Acta* 1998, **1375**(1-2):13-22.

591 Haidekker MA, L'Heureux N, Frangos JA: **Fluid shear stress increases membrane fluidity in endothelial cells: a study with DCVJ fluorescence.** *Am J Physiol Heart Circ Physiol* 2000, **278**(4):H1401-1406.

592 Ritov VB, Banni S, Yalowich JC, Day BW, Claycamp HG, Corongiu FP, Kagan VE: **Non-random peroxidation of different classes of membrane phospholipids in live cells detected by metabolically integrated cis-parinaric acid.** *Biochim Biophys Acta* 1996, **1283**(2):127-140.

593 Lippincottschwartz J, Yuan LC, Bonifacino JS, Klausner RD: **Rapid Redistribution of Golgi Proteins into the Er in Cells Treated with Brefeldin-a - Evidence for Membrane Cycling from Golgi to Er.** *Cell* 1989, **56**(5):801-813.

594 Hempel SL, Buettner GR, O'Malley YQ, Wessels DA, Flaherty DM: **Dihydrofluorescein diacetate is superior for detecting intracellular oxidants: Comparison with 2',7'-dichlorodihydrofluorescein diacetate, 5( and 6)-carboxy-2',7'-dichlorodihydrofluorescein diacetate, and dihydrorhodamine 123.** *Free Radical Biology and Medicine* 1999, **27**(1-2):146-159.

595 Yu W, So PT, French T, Gratton E: **Fluorescence generalized polarization of cell membranes: a two-photon scanning microscopy approach.** *Biophys J* 1996, **70**(2):626-636.

598 Burkhardt JK, Hester S, Lapham CK, Argon Y: **The lytic granules of natural killer cells are dual-function organelles combining secretory and pre-lysosomal compartments.** *J Cell Biol* 1990, **111**(6 Pt 1):2327-2340.

600 Berns MW, Wang ZF, Dunn A, Wallace V, Venugopalan V: **Gene inactivation by multiphoton-targeted photochemistry.** *Proceedings of the National Academy of Sciences of the United States of America* 2000, **97**(17):9504-9507.

601 Qin Y, Lu M, Gong XG: **Dihydrorhodamine 123 is superior to 2,7-dichlorodihydrofluorescein diacetate and dihydrorhodamine 6G in detecting intracellular hydrogen peroxide in tumor cells.** *Cell Biology International* 2008, **32**(2):224-228.

602 Shapiro AB, Ling V: **Transport of LDS-751 from the cytoplasmic leaflet of the plasma membrane by the rhodamine-123-selective site of P-glycoprotein.** *European Journal of Biochemistry* 1998, **254**(1):181-188.

603 Barber L, Prince HM, Rossi R, Bertocello I: **Fluoro-Gold: An alternative viability stain for multicolor flow cytometric analysis.** *Cytometry* 1999, **36**(4):349-354.

604 Makrigiorgos GM: **Detection of lipid peroxidation on erythrocytes using the excimer-forming property of a lipophilic BODIPY fluorescent dye.** *Journal of Biochemical and Biophysical Methods* 1997, **35**(1):23-35.

605 Drummen GPC, van Liebergen LCM, Op den Kamp JAF, Post JA: **C11-BODIPY581/591, an oxidation-sensitive fluorescent lipid peroxidation probe: (Micro)spectroscopic characterization and validation of methodology.** *Free Radical Biology and Medicine* 2002, **33**(4):473-490.

606 Millard PJ, Roth BL, Thi HPT, Yue ST, Haugland RP: **Development of the FUN-1 family of fluorescent probes for vacuole labeling and viability testing of yeasts.** *Applied and Environmental Microbiology* 1997, **63**(7):2897-2905.

607 Hallap T, Nagy S, Jaakma U, Johannisson A, Rodriguez-Martinez H: **Mitochondrial activity of frozen-thawed spermatozoa assessed by Mitotracker Deep Red 633.** *Theriogenology* 2005, **63**(8):2311-2322.

608 Bink K, Walch A, Feuchtinger A, Eisenmann H, Hutzler P, Hofler H, Werner M: **TO-PRO-3 is an optimal fluorescent dye for nuclear counterstaining in dual-colour FISH on paraffin sections.** *Histochemistry and Cell Biology* 2001, **115**(4):293-299.

609 Ward LD, Timasheff SN: **Cooperative Multiple Binding of Bisans and Daunomycin to Tubulin.** *Biochemistry* 1994, **33**(39):11891-11899.

611 Mukherjee S, Soe TT, Maxfield FR: **Endocytic sorting of lipid analogues differing solely in the chemistry of their hydrophobic tails.** *Journal of Cell Biology* 1999, **144**(6):1271-1284.

612 Krishna MMG, Periasamy N: **Fluorescence of organic dyes in lipid membranes: Site of solubilization and effects of viscosity and refractive index on lifetimes.** *Journal of Fluorescence* 1998, **8**(1):81-91.

613 Chiu I, Davis DM, Strominger JL: **Trafficking of spontaneously endocytosed MHC proteins.** *Proc Natl Acad Sci U S A* 1999, **96**(24):13944-13949.

615 Butler PJ, Norwich G, Weinbaum S, Chien S: **Shear stress induces a time- and position-dependent increase in endothelial cell membrane fluidity.** *American Journal of Physiology-Cell Physiology* 2001, **280**(4):C962-C969.

616 Straub M, Lodemann P, Holroyd P, Jahn R, Hell SW: **Live cell imaging by multifocal multiphoton microscopy.** *European Journal of Cell Biology* 2000, **79**(10):726-734.

617 Gidwani A, Holowka D, Baird B: **Fluorescence anisotropy measurements of lipid order in plasma membranes and lipid rafts from RBL-2H3 mast cells.** *Biochemistry* 2001, **40**(41):12422-12429.

618 Hemmrich K, Meersch M, von Heimburg D, Pallua N: **Applicability of the dyes CFSE, CM-Dil and PKH26 for tracking of human preadipocytes to evaluate adipose tissue engineering.** *Cells Tissues Organs* 2006, **184**(3-4):117-127.

620 Simard R: **Binding of Actinomycin D-3h to Heterochromatin as Studied by Quantitative High Resolution Radioautography.** *Journal of Cell Biology* 1967, **35**(3):716-&.

621 Stokke T, Steen HB: **Distinction of Leukocyte Classes Based on Chromatin-Structure-Dependent DNA-Binding of 7-Aminoactinomycin-D.** *Cytometry* 1987, **8**(6):576-583.

622 Kirschstein O, Sip M, Kittler L: **Quantitative and sequence-specific analysis of DNA-ligand interaction by means of fluorescent intercalator probes.** *Journal of Molecular Recognition* 2000, **13**(3):157-163.

623 Wistrom CA, Jones GM, Tobias PS, Sklar LA: **Fluorescence resonance energy transfer analysis of lipopolysaccharide in detergent micelles.** *Biophys J* 1996, **70**(2):988-997.

626 Pal R, Petri WA, Benyashar V, Wagner RR, Barenholz Y: **Characterization of the Fluorophore 4-Heptadecyl-7-Hydroxycoumarin - a Probe for the Headgroup Region of Lipid Bilayers and Biological-Membranes.** *Biochemistry* 1985, **24**(3):573-581.

627 Johnson ID, Kang HC, Haugland RP: **Fluorescent Membrane Probes Incorporating Dipyrrometheneboron Difluoride Fluorophores.** *Analytical Biochemistry* 1991, **198**(2):228-237.

628 Li H, Black PN, DiRusso CC: **A live-cell high-throughput screening assay for identification of fatty acid uptake inhibitors.** *Analytical Biochemistry* 2005, **336**(1):11-19.

630 Pin S, Chen HL, Lein PJ, Wang MM: **Nucleic acid binding agents exert local toxic effects on neurites via a non-nuclear mechanism.** *Journal of Neurochemistry* 2006, **96**(5):1253-1266.

631 Hoshi H, O'Brien J, Mills SL: **A novel fluorescent tracer for visualizing coupled cells in neural circuits of living tissue.** *Journal of Histochemistry & Cytochemistry* 2006, **54**(10):1169-1176.

635 Beisker W, Weller-Mewe EM, Nusse M: **Fluorescence enhancement of DNA-bound TO-PRO-3 by incorporation of bromodeoxyuridine to monitor cell cycle kinetics.** *Cytometry* 1999, **37**(3):221-229.

636 Kok JW, Babia T, Klappe K, Hoekstra D: **Fluorescent, Short-Chain C-6-Nbd-Sphingomyelin, but Not C-6-Nbd-Glucosylceramide, Is Subject to Extensive Degradation in the Plasma-Membrane - Implications for Signal-Transduction Related to Cell-Differentiation.** *Biochemical Journal* 1995, **309**:905-912.

639 Weston SA, Parish CR: **New Fluorescent Dyes for Lymphocyte Migration Studies - Analysis by Flow-Cytometry and Fluorescence Microscopy.** *Journal of Immunological Methods* 1990, **133**(1):87-97.

641 Grutzendler J, Tsai J, Gan WB: **Rapid labeling of neuronal populations by ballistic delivery of fluorescent dyes.** *Methods* 2003, **30**(1):79-85.

642 Malinin VS, Haque ME, Lentz BR: **The rate of lipid transfer during fusion depends on the structure of fluorescent lipid probes: A new chain-labeled lipid transfer probe pair.** *Biochemistry* 2001, **40**(28):8292-8299.

643 Montes LR, Lopez DJ, Sot J, Bagatolli LA, Stonehouse MJ, Vasil ML, Wu BX, Hannun YA, Goni FM, Alonso A: **Ceramide-enriched membrane domains in red blood cells and the mechanism of sphingomyelinase-induced hot-cold hemolysis.** *Biochemistry* 2008, **47**(43):11222-11230.

644 Watkins S, Geng XH, Li LH, Papworth G, Robbins PD, Drain P: **Imaging secretory vesicles by fluorescent protein insertion in propeptide rather than mature secreted peptide.** *Traffic* 2002, **3**(7):461-471.

645 Kim BG, Dai HN, McAttee M, Vicini S, Bregman BS: **Labeling of dendritic spines with the carbocyanine dye DiI for confocal microscopic imaging in lightly fixed cortical slices.** *Journal of Neuroscience Methods* 2007, **162**(1-2):237-243.

648 Lisboa S, Scherer GE, Quader H: **Localized endocytosis in tobacco pollen tubes: visualisation and dynamics of membrane retrieval by a fluorescent phospholipid.** *Plant Cell Rep* 2008, **27**(1):21-28.

649 Leung WY, Mao F, Haugland RP, Klaubert DH: **Lipophilic sulfophenylcarbocyanine dyes: Synthesis of a**

- new class of fluorescent cell membrane probes. *Bioorganic & Medicinal Chemistry Letters* 1996, **6**(13):1479-1482.
- 650 Alba FJ, Daban JR: **Inhibition of peroxyoxalate chemiluminescence by intercalation of fluorescent acceptors between DNA bases.** *Photochemistry and Photobiology* 1999, **69**(4):405-409.
- 651 de Maziere AM, Hage WJ, Ubbels GA: **A method for staining of cell nuclei in *Xenopus laevis* embryos with cyanine dyes for whole-mount confocal laser scanning microscopy.** *J Histochem Cytochem* 1996, **44**(4):399-402.
- 653 Dumas D, Muller S, Gouin F, Baros F, Viriot ML, Stoltz JF: **Membrane fluidity and oxygen diffusion in cholesterol-enriched erythrocyte membrane.** *Archives of Biochemistry and Biophysics* 1997, **341**(1):34-39.
- 654 Lin HJ, Herman P, Lakowicz JR: **Fluorescence lifetime-resolved pH imaging of living cells.** *Cytometry Part A* 2003, **52A**(2):77-89.
- 655 Altan N, Chen Y, Schindler M, Simon SM: **Defective acidification in human breast tumor cells and implications for chemotherapy.** *Journal of Experimental Medicine* 1998, **187**(10):1583-1598.
- 657 Janas T, Yarus M: **Specific RNA binding to ordered phospholipid bilayers.** *Nucleic Acids Res* 2006, **34**(7):2128-2136.
- 658 Tsuboi T, Lippiat JD, Ashcroft FM, Rutter GA: **ATP-dependent interaction of the cytosolic domains of the inwardly rectifying K<sup>+</sup> channel Kir6.2 revealed by fluorescence resonance energy transfer.** *Proc Natl Acad Sci U S A* 2004, **101**(1):76-81.
- 659 Ramoino P, Fronte P, Fato M, Beltrame F, Diaspro A: **Mapping cholesteryl ester analogue uptake and intracellular flow in *Paramecium* by confocal fluorescence microscopy.** *J Microsc* 2002, **208**(Pt 3):167-176.
- 660 Hwang J, Gheber LA, Margolis L, Edidin M: **Domains in cell plasma membranes investigated by near-field scanning optical microscopy.** *Biophysical Journal* 1998, **74**(5):2184-2190.
- 661 Simons M, Kramer EM, Macchi P, Rathke-Hartlieb S, Trotter J, Nave KA, Schulz JB: **Overexpression of the myelin proteolipid protein leads to accumulation of cholesterol and proteolipid protein in endosomes/lysosomes: implications for Pelizaeus-Merzbacher disease.** *Journal of Cell Biology* 2002, **157**(2):327-336.
- 662 Conti F, Fioravan.R, Malerba F, Wanke E: **Comparative Analysis of Extrinsic Fluorescence in Nerve Membranes and Lipid Bilayers.** *Biophysics of Structure and Mechanism* 1974, **1**(1):27-45.
- 663 Haller T, Dietl P, Deetjen P, Volkl H: **The lysosomal compartment as intracellular calcium store in MDCK cells: A possible involvement in InsP(3)-mediated Ca<sup>2+</sup> release.** *Cell Calcium* 1996, **19**(2):157-165.
- 664 He W, Wang H, Hartmann LC, Cheng JX, Low PS: **In vivo quantitation of rare circulating tumor cells by multiphoton intravital flow cytometry.** *Proc Natl Acad Sci U S A* 2007, **104**(28):11760-11765.
- 666 Yarger DE, Patrick CB, Rapoport SI, Murphy EJ: **A continuous fluorometric assay for phospholipase A(2) activity in brain cytosol.** *J Neurosci Methods* 2000, **100**(1-2):127-133.
- 667 Moulton HM, Nelson MH, Hatlevig SA, Reddy MT, Iversen PL: **Cellular uptake of antisense morpholino oligomers conjugated to arginine-rich peptides.** *Bioconjug Chem* 2004, **15**(2):290-299.
- 668 Gielen E, Vercammen J, Sykora J, Humpolickova J, vandeVen M, Benda A, Hellings N, Hof M, Engelborghs Y, Steels P *et al*: **Diffusion of sphingomyelin and myelin oligodendrocyte glycoprotein in the membrane of OLN-93 oligodendroglial cells studied by fluorescence correlation spectroscopy.** *Comptes Rendus Biologies* 2005, **328**(12):1057-1064.
- 670 Lee HS, Mihailoff GA: **Fluorescent double-label study of lateral reticular nucleus projections to the spinal cord and periaqueductal gray in the rat.** *Anatomical Record* 1999, **256**(1):91-98.
- 672 James AM, Sharpley MS, Manas ARB, Frerman FE, Hirst J, Smith RAJ, Murphy MP: **Interaction of the mitochondria-targeted antioxidant MitoQ with phospholipid bilayers and ubiquinone oxidoreductases.** *Journal of Biological Chemistry* 2007, **282**(20):14708-14718.
- 673 Michihara A, Toda K, Kubo T, Fujiwara Y, Akasaki K, Tsuji H: **Disruptive effect of chloroquine on lysosomes in cultured rat hepatocytes.** *Biological & Pharmaceutical Bulletin* 2005, **28**(6):947-951.
- 675 Kong HJ, Boontheekul T, Mooney DJ: **Quantifying the relation between adhesion ligand-receptor bond formation and cell phenotype.** *Proceedings of the National Academy of Sciences of the United States of America* 2006, **103**(49):18534-18539.
- 676 Thanos S: **Specific Transcellular Carbocyanine-Labeling of Rat Retinal Microglia during Injury-Induced Neuronal Degeneration.** *Neuroscience Letters* 1991, **127**(1):108-112.
- 677 Jagasia R, Grote P, Westermann B, Conradt B: **DRP-1-mediated mitochondrial fragmentation during EGL-1-induced cell death in *C. elegans*.** *Nature* 2005, **433**(7027):754-760.
- 678 Hoekstra D, Deboer T, Klappe K, Wilschut J: **Fluorescence Method for Measuring the Kinetics of Fusion between Biological-Membranes.** *Biochemistry* 1984, **23**(24):5675-5681.

679 Nishimura SY, Vrljic M, Klein LO, McConnell HM, Moerner WE: **Cholesterol depletion induces solid-like regions in the plasma membrane.** *Biophysical Journal* 2006, **90**(3):927-938.

680 Maier B, Gluba W, Bernier B, Turner T, Mohammad K, Guise T, Sutherland A, Thorner M, Scrabble H: **Modulation of mammalian life span by the short isoform of p53.** *Genes & Development* 2004, **18**(3):306-319.

681 Laib S, Seeger S: **FRET studies of the interaction of dimeric cyanine dyes with DNA.** *Journal of Fluorescence* 2004, **14**(2):187-191.

682 Rockwell PL, Storey BT: **Kinetics of onset of mouse sperm acrosome reaction induced by solubilized zona pellucida: Fluorimetric determination of loss of pH gradient between acrosomal lumen and medium monitored by Dapoxyl (2-aminoethyl) sulfonamide and of intracellular Ca<sup>2+</sup> changes monitored by fluo-3.** *Molecular Reproduction and Development* 2000, **55**(3):335-349.

683 Mukherjee S, Zha X, Tabas I, Maxfield FR: **Cholesterol distribution in living cells: fluorescence imaging using dehydroergosterol as a fluorescent cholesterol analog.** *Biophys J* 1998, **75**(4):1915-1925.

684 Mangiardi DA, McLaughlin-Williamson K, May KE, Messana EP, Mountain DC, Cotanche DA: **Progression of hair cell ejection and molecular markers of apoptosis in the avian cochlea following gentamicin treatment.** *Journal of Comparative Neurology* 2004, **475**(1):1-18.

685 Sutton EJ, Henning TD, Pichler BJ, Bremer C, Daldrup-Link HE: **Cell tracking with optical imaging.** *European Radiology* 2008, **18**(10):2021-2032.

700 Ho C, Williams BW, Stubbs CD: **Analysis of cell membrane micro-heterogeneity using the fluorescence lifetime of DPH-type fluorophores.** *Biochim Biophys Acta* 1992, **1104**(2):273-282.

701 Fuchs P, Parola A, Robbins PW, Blout ER: **Fluorescence polarization and viscosities of membrane lipids of 3T3 cells.** *Proc Natl Acad Sci U S A* 1975, **72**(9):3351-3354.

702 Kuypers FA, van den Berg JJ, Schalkwijk C, Roelofsen B, Op den Kamp JA: **Parinaric acid as a sensitive fluorescent probe for the determination of lipid peroxidation.** *Biochim Biophys Acta* 1987, **921**(2):266-274.

705 Honegger UE, Roscher AA, Wiesmann UN: **Evidence for lysosomotropic action of desipramine in cultured human fibroblasts.** *J Pharmacol Exp Ther* 1983, **225**(2):436-441.

706 Walkup GK, Burdette SC, Lippard SJ, Tsien RY: **A New Cell-Permeable Fluorescent Probe for Zn<sup>2+</sup>.** *J Am Chem Soc* 2000, **122**(23):5644-5645.

708 Darzynkiewicz Z, Kapuscinski J, Carter SP, Schmid FA, Melamed MR: **Cytostatic and cytotoxic properties of pyronin Y: relation to mitochondrial localization of the dye and its interaction with RNA.** *Cancer Res* 1986, **46**(11):5760-5766.

709 Easton TG, Valinsky JE, Reich E: **Merocyanine 540 as a fluorescent probe of membranes: staining of electrically excitable cells.** *Cell* 1978, **13**(3):475-486.

711 Minier C, Moore MN: **Rhodamine B accumulation and MXR protein expression in mussel blood cells: Effects of exposure to vincristine.** *Marine Ecology-Progress Series* 1996, **142**(1-3):165-173.

712 Cooperstein SJ, Dixit PK, Lazarow A: **Studies on the Mechanism of Janus Green-B Staining of Mitochondria .4. Reduction of Janus Green-B by Isolated Cell Fractions.** *Anatomical Record* 1960, **138**(1):49-66.

713 Glunde K, Foss CA, Takagi T, Wildes F, Bhujwala ZM: **Synthesis of 6'-O-lissamine-rhodamine B-glucosamine as a novel probe for fluorescence imaging of lysosomes in breast tumors.** *Bioconjugate Chemistry* 2005, **16**(4):843-851.

714 Li J, Norwood DL, Mao LF, Schulz H: **Mitochondrial metabolism of valproic acid.** *Biochemistry* 1991, **30**(2):388-394.

715 Gerasimenko JV, Gerasimenko OV, Palejwala A, Tepikin AV, Petersen OH, Watson AJM: **Menadione-induced apoptosis: roles of cytosolic Ca<sup>2+</sup> elevations and the mitochondrial permeability transition pore.** *Journal of Cell Science* 2002, **115**(3):485-497.

716 Maro B, Marty MC, Bornens M: **In vivo and in vitro effects of the mitochondrial uncoupler FCCP on microtubules.** *EMBO J* 1982, **1**(11):1347-1352.

717 Lim MLR, Minamikawa T, Nagley P: **The protonophore CCCP induces mitochondrial permeability transition without cytochrome c release in human osteosarcoma cells.** *Febs Letters* 2001, **503**(1):69-74.

718 Hruban Z: **Pulmonary changes induced by amphiphilic drugs.** *Environ Health Perspect* 1976, **16**:111-118.

719 Gangalum RK, Schibler MJ, Bhat SP: **Small heat shock protein alpha B-crystallin is part of cell cycle-dependent Golgi reorganization.** *Journal of Biological Chemistry* 2004, **279**(42):43374-43377.

720 Schneckenburger H, Wagner M, Kretschmar M, Strauss WS, Sailer R: **Laser-assisted fluorescence microscopy for measuring cell membrane dynamics.** *Photochem Photobiol Sci* 2004, **3**(8):817-822.

721 <http://www.invitrogen.com/site/us/en/home/support/Research-Tools/Image-Gallery/Image-Detail.2507.html>

- 723 Miller CR, Clapp PJ, O'Brien DF: **Visible light-induced destabilization of endocytosed liposomes.** *Febs Letters* 2000, **467**(1):52-56.
- 724 Bianco F, Perrotta C, Novellino L, Francolini M, Riganti L, Menna E, Saglietti L, Schuchman EH, Furlan R, Clementi E *et al*: **Acid sphingomyelinase activity triggers microparticle release from glial cells.** *EMBO J* 2009, **28**(8):1043-1054.
- 725 Ducker CE, Draper JM, Xia ZP, Smith CD: **In vitro and cellular assays for palmitoyl acyltransferases using fluorescent lipidated peptides.** *Methods* 2006, **40**(2):166-170.
- 726 Windschiegel B, Orth A, Romer W, Berland L, Stechmann B, Bassereau P, Johannes L, Steinem C: **Lipid reorganization induced by Shiga toxin clustering on planar membranes.** *PLoS One* 2009, **4**(7):e6238.
- 727 Chen XC, Deng YL, Lin Y, Pang DW, Qing H, Qu F, Xie HY: **Quantum dot-labeled aptamer nanoprobe specifically targeting glioma cells.** *Nanotechnology* 2008, **19**(23).
- 728 Keizer K, Kuypers HGJM, Huisman AM, Dann O: **Diamidino Yellow Dihydrochloride (Dy.2hcl) - a New Fluorescent Retrograde Neuronal Tracer, Which Migrates Only Very Slowly out of the Cell.** *Experimental Brain Research* 1983, **51**(2):179-191.
- 729 Duvvuri M, Feng W, Mathis A, Krise JP: **A cell fractionation approach for the quantitative analysis of subcellular drug disposition.** *Pharm Res* 2004, **21**(1):26-32.
- 730 Huang SS, Koh HA, Huang JS: **Suramin enters and accumulates in low pH intracellular compartments of v-sis-transformed NIH 3T3 cells.** *FEBS Lett* 1997, **416**(3):297-301.
- Invi Molecular Probes online inventory ([www.invitrogen.com](http://www.invitrogen.com))

**Supplemental Table 11: random dataset from DrugBank representing molecules with drug properties.** Structure is presented as the *Simplified Molecular Input Line Entry Specification string of the major microspecies at pH 7.4, as calculated by ChemAxon.*

| ID | Chemical Structure                                                                                                                                                                                                                                     |
|----|--------------------------------------------------------------------------------------------------------------------------------------------------------------------------------------------------------------------------------------------------------|
| 1  | <chem>P(OC1[C@@H](O[C@H](n2c3cc(C)c(cc3nc2)C)C1O)CO)(OC(CNC(=O)CC[C@]1/C=C2/NC([C@@]3(N=C([C@@H](CCC(=O)N)[C@@]3(CC(=O)N)C)\C(=C3/N=C(\C=C4/N=C([C@@H](CCC(=O)N)C/4(C)C)\C=2VC)[C@@H](CCC(=O)N)[C@@]3(CC(=O)N)C)\C)C)[C@@H]1CC(=O)N)C)C(=O)[O-]</chem> |
| 2  | <chem>O=C([O-])[C@@H]([NH3+])Cc1[nH]cnc1</chem>                                                                                                                                                                                                        |
| 3  | <chem>[S+](C[C@H]1O[C@@H](n2c3ncnc(N)c3nc2)[C@H](O)[C@@H]1O)(CC[C@H]([NH3+])C(=O)[O-])C</chem>                                                                                                                                                         |
| 4  | <chem>O=C([O-])[C@@H]([NH3+])Cc1cccc1</chem>                                                                                                                                                                                                           |
| 5  | <chem>O=C(N)CC[C@H]([NH3+])C(=O)[O-]</chem>                                                                                                                                                                                                            |
| 6  | <chem>P(OC[C@H]1O[C@@H](n2c3ncnc(N)c3nc2)[C@H](O)[C@@H]1O)(=O)[O-]</chem>                                                                                                                                                                              |
| 7  | <chem>OC1CC(C)C)\C=C\C(=C\C=C\C(=C\C=C\C=C\C(=C\C=C\C=C2C(CC(O)C=C2C)(C)C)/C)\C(=C(C)C</chem>                                                                                                                                                          |
| 8  | <chem>O=C([O-])CCC(=O)[O-]</chem>                                                                                                                                                                                                                      |
| 9  | <chem>O=C([O-])CC[C@H]([NH3+])C(=O)[O-]</chem>                                                                                                                                                                                                         |
| 10 | <chem>O=C([O-])C[NH3+]</chem>                                                                                                                                                                                                                          |
| 11 | <chem>Oc1c(C=O)c(cnc1C)CO</chem>                                                                                                                                                                                                                       |
| 12 | <chem>s1c[n+](Cc2cnc(nc2N)C)c(C)c1CCO</chem>                                                                                                                                                                                                           |
| 13 | <chem>O(C(=O)C(NC(=O)C([NH3+])CC(=O)[O-])Cc1cccc1)C</chem>                                                                                                                                                                                             |
| 14 | <chem>[nH]1c2c(ncnc2N)nc1</chem>                                                                                                                                                                                                                       |
| 15 | <chem>C1c1ccc(cc1)C(CC(=O)[O-])C[NH3+]</chem>                                                                                                                                                                                                          |
| 16 | <chem>O(CC(O)C[NH2+])C(C)C)c1ccc(cc1)CCC(OC)=O</chem>                                                                                                                                                                                                  |
| 17 | <chem>[NH3+](Cc1cccc1)(C)C</chem>                                                                                                                                                                                                                      |
| 18 | <chem>S1C(Cc2ccc(OCC3(Oc4c(CC3)c(C)c(O)c(C)c4C)C)c2)C(=O)[N-]C1=O</chem>                                                                                                                                                                               |
| 19 | <chem>O1[C@H](CC)[C@](O)(C)[C@H](O)[C@@H](C)C(=O)[C@@H](C[C@](O)(C)[C@H](O)[C@@H]2O[C@@H](C[C@H]([NH+](C)C)[C@H]2O)C)[C@@H]</chem>                                                                                                                     |

|    |                                                                                                                                                                               |
|----|-------------------------------------------------------------------------------------------------------------------------------------------------------------------------------|
|    | (C)[C@H](O)[C@@H]2O[C@@H](C)[C@H](O)[C@H](OC)(C2)C)[C@@H](C)C1=O)C                                                                                                            |
| 20 | O(C)c1ccc(OC)cc1C(O)CNC(=O)C[NH3+]                                                                                                                                            |
| 21 | O(C(=O)C(O)(C1CCCC1)c1cccc1)CC[N+](CC)(CC)C                                                                                                                                   |
| 22 | S(=O)([O-])=(NC(=O)NC1CCC(CC1)C)c1ccc(cc1)CCNC(=O)N1CC(C)=C(CC)C1=O                                                                                                           |
| 23 | Clc1cc2NC(N(S(=O)(=O)c2cc1S(=O)(=O)N)C)CC1                                                                                                                                    |
| 24 | O1CC[NH2+][C[C@H]1[C@@H](Oc1cccc1OCC)c1cccc1                                                                                                                                  |
| 25 | Oc1ccc(N)cc1C(=O)[O-]                                                                                                                                                         |
| 26 | O=C1NC(=O)[N-]C1(c1cccc1)c1cccc1                                                                                                                                              |
| 27 | Clc1c2c(C([O-])=C3[C@H](C[C@@H]4[C@@](O)(C(=O)C(=C(/O)N)C(=O)[C@H]4N(C)C)C3=O)[C@@]2(O)C)c(O)cc1                                                                              |
| 28 | Clc1cccc1C(nc1cc1)(c1cccc1)c1cccc1                                                                                                                                            |
| 29 | O=C([O-])C                                                                                                                                                                    |
| 30 | S(=O)(=O)(N)c1ccc(N)cc1                                                                                                                                                       |
| 31 | Clc1c2CN3C(=NC(=O)[CH-]3)Nc2ccc1Cl                                                                                                                                            |
| 32 | ClC(=C(c1ccc(OC)cc1)c1ccc(OC)cc1)c1ccc(OC)cc1                                                                                                                                 |
| 33 | Ic1c(C(=O)[O-])c(Ic(NC(=O)C)c(I)c1NC(=O)C                                                                                                                                     |
| 34 | S1[C@H]2N(C(C(=O)[O-])=C(C1)CSc1nnnn1C)C(=O)[C@@]2(OC)NC(=O)CSCC#N                                                                                                            |
| 35 | O1[C@H](C)[C@@H](N[C@H]2C=C(CO)[C@H](O)[C@H](O)[C@H]2O)[C@H](O)[C@@H](O)[C@H]1O[C@H]1[C@H](O)[C@@H](O)[C@H](O)[C@@H]1CO)O[C@H]1[C@H](O)[C@@H](O)[C@@H](O)[C@@H](O)[C@@H]1CO)O |
| 36 | O1[C@H]2[C@]34[C@H]([C@H]([NH+](CC3)C)Cc3c4c1c(O)cc3)C=C[C@@H]2O                                                                                                              |
| 37 | O=C1N=C(Nc2n(cnc12)CCC(CO)CO)N                                                                                                                                                |
| 38 | Clc1cccc(F)c1-c1noc(C)c1C(=O)N[C@H]1[C@H]2SC(C)(C)[C@@H](N2C1=O)C(=O)[O-]                                                                                                     |
| 39 | O=C1N(C)C(=O)N(C)C(=O)C1(C(CC)C)CC=C                                                                                                                                          |
| 40 | Clc1ccc(cc1S(=O)(=O)N)C1(O)NC(=O)c2c1cccc2                                                                                                                                    |
| 41 | O=C1NC(=O)NC(=O)C1(C(CCC)C)CC                                                                                                                                                 |
| 42 | O=C1NC[C@H]([NH3+])C(=O)[N-][C@@H](CO)C(=O)N[C@@H](CNC(=O)C[C@@H]([NH3+])CCC[NH3+])C(=O)N(C(=O)N(C(=O)N)C(=O)NC1[C@@H]1NC(=O)[NH+])CC1)N                                      |
| 43 | Clc1cc(Nc2nnc3c2cc(OCCCN2CCOCC2)c(OC)c3)cc1F                                                                                                                                  |
| 44 | O1[C@](NC(=O)[C@@H]2[C@H]3[C@H]([NH+](C2)C)Cc2c4c3cccc4[nH]c2)(C)C(=O)N2[C@@H](C c3cccc3)C(=O)N3[C@@H](CCC3)[C@]12O                                                           |
| 45 | o1c(ccc1[N+](=O)[O-])C=N(C(=O)N                                                                                                                                               |
| 46 | [NH2+](CCCC1c2c(C=Cc3c1cccc3)cccc2)C                                                                                                                                          |
| 47 | O1C(C)(C)C(=O)N(C)C1=O                                                                                                                                                        |
| 48 | OC[C@@H](NC(=O)[C@@H]1C=C2[C@H]([NH+](C1)C)Cc1c3c2cccc3[nH]c1)CC                                                                                                              |
| 49 | Clc1ccc(cc1)C(N1CC[NH+](CC1)Cc1ccc(cc1)C(C)(C)c1cccc1                                                                                                                         |
| 50 | s1cc(nc1N)/C(=O)NOC(C(=O)[O-])(C)C)/C(=O)N[C@H]1[C@@H](N(S(=O)(=O)[O-])C1=O)C                                                                                                 |
| 51 | O(CCCCC)c1ccc(cc1)-c1ccc(cc1)-c1ccc(cc1)C(=O)N[C@H]1C[C@@H](O)[C@@H](                                                                                                         |

|    |                                                                                                                                                         |
|----|---------------------------------------------------------------------------------------------------------------------------------------------------------|
|    | O)NC(=O)[C@H]2N(C[C@H](C)[C@@H]2O)C(=O)[C@@H](NC(=O)[C@@H](NC(=O)[C@H]2N(C[C@H](O)C2)C(=O)[C@@H](NC1=O)[C@H](O)C)[C@H](O)[C@@H](O)c1ccc(O)cc1)[C@H](O)C |
| 52 | Oc1cc(ccc1O)[C@@H](O)C[NH3+]                                                                                                                            |
| 53 | O(CC(CCC)(COC(=O)N)C)C(=O)N                                                                                                                             |
| 54 | S1c2c(N(c3c1cccc3)CCCN1CC[NH+](CC1)C)cc(SC)cc2                                                                                                          |
| 55 | Clc1cccc1C1C(C(OCC)=O)=C(NC(C)=C1C(OC)=O)COCC[NH3+]                                                                                                     |
| 56 | [nH+]1c2c(CCCC2)c(N)c2c1cccc2                                                                                                                           |
| 57 | n1c(N)c2nc(-c3cccc3)c(nc2nc1N)N                                                                                                                         |
| 58 | Cl[C@@]12[C@H]([C@@H]3[C@H](C)[C@](O)(C(=O)CO)[C@]3(C[C@@H]1O)C)CCC1=CC(=O)C=C[C@@]12C                                                                  |
| 59 | Brc1ccc(cc1)[C@H](CC[NH+](C)C)c1cccc1                                                                                                                   |
| 60 | Brc1ccc(OC)c(C(=O)NC[C@H]2[NH+](CCC2)CC)c1OC                                                                                                            |
| 61 | S1[C@H]2N([C@@H](C(=O)[O-])C1(C)C)C(=O)[C@H]2NC(=O)[C@H]([NH3+])c1cccc1                                                                                 |
| 62 | O(C(=O)[C@H](CO)c1cccc1)C1CC2[NH+](C(C1)C2)C                                                                                                            |
| 63 | O[C@H]1C[C@@H](O)[C@H](C=C\C[C@@](O)(C)CCC)C)[C@H]1CVC=C\CCCC(=O)[O-]                                                                                   |
| 64 | Clc1cc2N(c3c(Sc2cc1)cccc3)CCCN1CC[NH+](CC1)C                                                                                                            |
| 65 | [NH+]1(CCC(C)1)=C1c2c(C=Cc3c1cccc3)cccc2)C                                                                                                              |
| 66 | S(=O)(=O)(N)c1cc2S(=O)(=O)NC(Nc2cc1C(F)(F)F)Cc1cccc1                                                                                                    |
| 67 | O(C)c1cc(C)c(\C=C\C=C\C=C\C=C(=O)[O-])\C)\C)c(C)c1C                                                                                                     |
| 68 | O=C1N(C)C(=O)NC(=O)C1(CC)CC                                                                                                                             |
| 69 | s1c2c(ccc(O)c2)c(C(=O)c2ccc(OCC[NH+])3CCCCC3)cc2)c1-c1ccc(O)cc1                                                                                         |
| 70 | S(=O)(=O)(N)c1ccc(-n2nc(cc2-c2ccc(cc2)C)C(F)F)cc1                                                                                                       |
| 71 | Clc1cccc(Cl)c1-c1noc(C)c1C(=O)N[C@H]1[C@H]2SC(C)(C)[C@@H](N2C1=O)C(=O)[O-]                                                                              |
| 72 | O=C(c1ccc(cc1)C)c1n(C)c(cc1)CC(=O)[O-]                                                                                                                  |
| 73 | OC(CC[N+](CC)(CC)CC)(C1CCCC1)c1cccc1                                                                                                                    |
| 74 | O=C([O-])C(CCC)CCC                                                                                                                                      |
| 75 | O=C([O-])\C=C\C=C\C=C\C=C\C=C=1C(CCCC=1C)(C)C)/C                                                                                                        |
| 76 | O(C(=O)C=1C(C(C(OC)=O)=C(NC=1C)C)c1cc([N+](=O)[O-])ccc1)C(C[NH+](CCC(c1cccc1)c1cccc1)C)(C)C                                                             |
| 77 | O=C1N(C)C(=O)[N-]C1(CC)c1cccc1                                                                                                                          |
| 78 | Clc1cc2c(Oc3c(N=C2N2CC[NH2+])CC2)cccc3)cc1                                                                                                              |
| 79 | FC1=CNC(=O)NC1=O                                                                                                                                        |
| 80 | Clc1c(cccc1Cl)-c1nnc(nc1N)N                                                                                                                             |
| 81 | S(=O)([O-])=Nc1nc(nc(OCCO)c1Oc1cccc1OC)-c1nccn1)c1ccc(cc1)C(C)C                                                                                         |
| 82 | O(C)c1cc(ccc1OC)C[C@H]1[N@+](CCc2cc(OC)c(O)C)cc12)(CCC(OCCCCOC(=O)CC[N@+]1(CCCc2cc(OC)c(OC)cc2[C@H]1Cc1cc(OC)c(OC)cc1)C)=O)C                            |
| 83 | S1[C@H]2N(C(C(=O)[O-])=C(C1)C)C(=O)[C@H]2NC(=O)[C@H]([NH3+])c1cccc1                                                                                     |

|     |                                                                                                                                                                                       |
|-----|---------------------------------------------------------------------------------------------------------------------------------------------------------------------------------------|
| 84  | [NH+][C](CCN(CC)CC=Cc1cccc1)C(c1cccc1)c1ccc<br>cc1                                                                                                                                    |
| 85  | O(C)c1cc2N([C@@H]3[C@@]4([C@H]5[NH+](CC<br>=C[C@@]5(CC)[C@@H](OC(=O)C)[C@]3(O)C(O<br>C)=O)CC4)c2cc1[C@@]1(c2[nH]c3c(c2CC[NH+]2C<br>[C@@](O)(C[C@@H](C1)C2)CC)cccc3)C(OC)=O<br>C       |
| 86  | FC(F)(F)c1cc(ccc1)CC([NH2+])CC                                                                                                                                                        |
| 87  | Clc1cccc(Cl)c1NC1=[NH+]CCN1                                                                                                                                                           |
| 88  | s1c(nnc1N=S(=O)([O-])c1ccc(N)cc1)C                                                                                                                                                    |
| 89  | S1[C@H]2N([C@@H](C(=O)[O-<br>])C1(C)C)C(=O)[C@H]2NC(=O)C(C(=O)[O-<br>])c1cccc1                                                                                                        |
| 90  | S(C(=O)[C@]1(OC(=O)CC)[C@@]2([C@H]([C@@<br>H]3[C@H](F)C4=CC(=O)C=C[C@]4(C)[C@@]3(<br>F)[C@@H](O)C2)C[C@H]1C)C)CF                                                                      |
| 91  | O=C(N[C@H]1C=C2[C@H](N(C1)C)Cc1c3c2cccc3[<br>nH]c1)N(CC)CC                                                                                                                            |
| 92  | Clc1nc(C(=O)N=C(N)N)c(nc1N)N                                                                                                                                                          |
| 93  | Clc1cc(C(=O)NC2CC[NH+](CC2OC)CCCOc2ccc(F)<br>cc2)c(OC)cc1N                                                                                                                            |
| 94  | Oc1cc(ccc1)[C@@H](O)[C@@H]([NH3+])C                                                                                                                                                   |
| 95  | Oc1cc2[C@@]34CCCC[C@@]3(O)[C@H]([NH+](C<br>C4)CC3CCC3)Cc2cc1                                                                                                                          |
| 96  | O1c2c3c4e(c(O)c2)C(=O)C(NC(=O)/C(=C\C=C/[C<br>@@H](C)[C@@H](O)[C@H](C)[C@H](O)[C@H](<br>C)[C@H](OC(=O)C)[C@H](C)[C@H](OC)\C=C/O[<br>C@]1(C)C3=O)/C=C1NC2(N=C14)CC[NH+](CC2)<br>CC(C)C |
| 97  | F[C@@]12[C@H]([C@@H]3[C@@H](O)[C@](O<br>)C(=O)CO)[C@]3(C[C@@H]1O)C)CCC1=CC(=O)<br>C=C[C@@]12C                                                                                         |
| 98  | O=C1CC[C@@]2([C@@H]3[C@H]([C@@H]4CC[<br>C@H](O)[C@]4(CC3)CCC2=C1)C                                                                                                                    |
| 99  | Clc1cc2c(NC(=O)C(N=C2c2cccc2)C(=O)[O-])cc1                                                                                                                                            |
| 100 | P(O)(=O)([O-])C(P(O)(=O)[O-])(O)CCC[NH3+]                                                                                                                                             |
| 101 | Fc1ccc(cc1)Cn1c2c(nc1NC1CC[NH+](CC1)CCc1ccc<br>(OC)cc1)cccc2                                                                                                                          |
| 102 | O(CCCC)c1ccc(cc1)C(=O)CC[NH+]1CCCCC1                                                                                                                                                  |
| 103 | Oc1cc2c(C[C@H]3[NH+](CC[C@]2(C)[C@H]3C)C<br>C=C(C)C)cc1                                                                                                                               |
| 104 | Clc1cc(N2CCN(CC2)CCCN2N=C3N(C=CC=C3)C2<br>=O)ccc1                                                                                                                                     |
| 105 | O1C(CNC1=O)COc1cc(cc(c1)C)C                                                                                                                                                           |
| 106 | [NH3+][CCc1[nH]cnc1                                                                                                                                                                   |
| 107 | Fc1ccc(cc1)[C@H]1N(CCO[C@H]1O[C@H](C)c1cc<br>(cc(c1)C(F)(F)F)C(F)(F)F)CC1=NC(=O)[N-]N1                                                                                                |
| 108 | S1c2c(N(c3c1cccc3)C(=O)CCN1CCOCC1)cc(NC(O<br>CC)=O)cc2                                                                                                                                |
| 109 | O1[C@H](CO)[C@@H](O)[C@H]([NH3+])[C@@H<br>(O)[C@H]1O[C@@H]1[C@@H](O)[C@H](O[C@<br>H]2O[C@H](C[NH3+])[C@@H](O)C[C@H]2[NH3<br>+])[C@@H]([NH3+])C[C@H]1[NH3+]                            |
| 110 | Fc1cc(F)ccc1N1C=C(C(=O)[O-<br>])C(=O)c2cc(F)c(nc12)N1C[C@@H]2[C@H](C1)C2<br>[NH3+]                                                                                                    |
| 111 | S1[C@H]2N(C(C(=O)[O-<br>])=C(C1)COC(=O)C)C(=O)[C@H]2NC(=O)[C@H]([<br>NH3+])c1cccc1                                                                                                    |
| 112 | Oc1cc(N(CC2=[NH+]CCN2)c2ccc(cc2)C)ccc1                                                                                                                                                |
| 113 | Clc1cc(NC2occc2)c(cc1S(=O)(=O)N)C(=O)[O-]                                                                                                                                             |

|     |                                                                                                                                                                                                                               |
|-----|-------------------------------------------------------------------------------------------------------------------------------------------------------------------------------------------------------------------------------|
| 114 | o1c(ccc1[N+](=O)[O-])\C=N/N1CC(=O)NC1=O                                                                                                                                                                                       |
| 115 | S(=O)(=O)(N(CC(C)C)C[C@@H](O)[C@@H](NC(<br>O[C@H]1CCOC1)=O)Cc1cccc1)c1ccc(N)cc1                                                                                                                                               |
| 116 | O1[C@@H]2[C@]34CC[NH+](C[C@H](Cc5c3c1c(O)<br>cc5)[C@]4(O)CCC2=O)CC1CC1                                                                                                                                                        |
| 117 | O(C(C)c1c2[nH]c(C=C3N=C(C=C4N=C(C=C5[nH]c(<br>=C2)c(C)c5C(O)C)C(C)=C4CCC(=O)[O-<br>])C(CCC(=O)[O-<br>])=C3C)c1C)C(C)c1c=2[nH]c(=Cc3[nH]c(C=C4/N=<br>C(\C=C5/N=C(C=2)C(C)=C5CCC(=O)[O-<br>])C(CCC(=O)[O-])=C4C)c(C)c3C(O)C)c1C |
| 118 | S1C[C@H](O[C@H]1CO)N1C=CC(=NC1=O)N                                                                                                                                                                                            |
| 119 | O(C)c1ccc(OC)cc1C(O)C([NH3+])C                                                                                                                                                                                                |
| 120 | O(C(=O)C(O)c1cccc1)C1CC2[N+](C(C1)CC2)(C)C                                                                                                                                                                                    |
| 121 | [NH+](CC(CN1c2c(CCc3c1cccc3)cccc2)C)(C)C                                                                                                                                                                                      |
| 122 | [N+](CCC(CC1)=C(c1cccc1)c1cccc1)(C)C                                                                                                                                                                                          |
| 123 | s1c2cc(OC(F)(F)F)ccc2nc1N                                                                                                                                                                                                     |
| 124 | O(Cc1cccc1)CC(N(CC[NH+](CCN(CC(=O)[O-<br>])CC(=O)[O-])CC(=O)[O-])CC(=O)[O-])C(=O)[O-]                                                                                                                                         |
| 125 | O=C(N(O)CCCCNC(=O)CCC(=O)N(O)CCCC[N<br>H3+])CCC(=O)NCCCCC(N(O)C(=O)C                                                                                                                                                          |
| 126 | O1C2C3N(C(CC(OC(=O)C(CO)c4cccc4)C3)C12)C                                                                                                                                                                                      |
| 127 | O1CCc2c([nH]c3c2cccc3CC)C1(CC(=O)[O-])CC                                                                                                                                                                                      |
| 128 | [NH3+][C@@H]1CC1c1cccc1                                                                                                                                                                                                       |
| 129 | S([C@@H]1[NH2+][C@@H](CC1)C(=O)N(C)C)C=<br>1[C@@H]([C@H]2N(C=1C(=O)[O-<br>])C(=O)[C@@H]2[C@H](O)C)C                                                                                                                           |
| 130 | O=C(N[C@@H](C(C)C)C(=O)NC)[C@@H]([C<br>@H](O)C(=O)NO)CC(C)C                                                                                                                                                                   |
| 131 | IC#CCOc1cc(Cl)c(Cl)cc1Cl                                                                                                                                                                                                      |
| 132 | O=C1NCNC(=O)C1(CC)c1cccc1                                                                                                                                                                                                     |
| 133 | O(CC)c1nc2c(n1Cc1ccc(cc1)-c1cccc1-<br>c1nn[nH]n1)e(ccc2)C(=O)[O-]                                                                                                                                                             |
| 134 | S1CCC(c2cc(ccc12)C#Cc1ccc(cc1)C(OCC)=O)(C)C                                                                                                                                                                                   |
| 135 | Clc1c2c(cc(O)c1O)C(C[NH2+])CC2)c1ccc(O)cc1                                                                                                                                                                                    |
| 136 | O=C1N(CCCCC(=O)C)C(=O)N(c2ncn(c12)C)C                                                                                                                                                                                         |
| 137 | O(CCC)c1ccc(cc1N)C(OCC[NH+](CC)CC)=O                                                                                                                                                                                          |
| 138 | Clc1ccc(cc1S(=O)(=O)N)C(=O)NN1c2c(CC1C)cccc2                                                                                                                                                                                  |
| 139 | O=C1N(N(C(=O)[C-]1CCCC)c1cccc1)c1cccc1                                                                                                                                                                                        |
| 140 | O=C(N(C1CC[NH+](CC1)CCc1cccc1)c1cccc1)CC                                                                                                                                                                                      |
| 141 | Oc1cc(cc(O)c1)C(O)C([NH2+])C(C)C                                                                                                                                                                                              |
| 142 | O=C1c2c(N(C=C1C(=O)[O-])CC)cc(cc2)-c1ccncc1                                                                                                                                                                                   |
| 143 | Oc1c(cccc1C(C)C)C(C)C                                                                                                                                                                                                         |
| 144 | s1c(nnc1S(=O)([O-])=[NH])NC(=O)C                                                                                                                                                                                              |
| 145 | O=C1N(C)C(=O)CC1c1cccc1                                                                                                                                                                                                       |
| 146 | O=C1CCC2=C3[C@H]([C@@H]4CC[C@@](O)(C#<br>CC)[C@]4(C[C@@H]3c3ccc(N(C)C)cc3)C)CCC2=C<br>1                                                                                                                                       |
| 147 | Clc1cc2c(NC(=O)C(O)N=C2c2cccc2)cc1                                                                                                                                                                                            |
| 148 | F[C@@H]1C2=CC(=O)CC[C@@]2([C@@H]2[C@<br>H]([C@@H]3[C@H]4OC(O[C@@]4(C(=O)CO)[C<br>@]3(C[C@@H]2O)C)C)C)C1)C                                                                                                                     |
| 149 | O=C1N(C)C(=O)NC(=O)C1(C)C)c1cccc1                                                                                                                                                                                             |
| 150 | O[C@H]([C@@H]([NH2+])C)C)c1cccc1                                                                                                                                                                                              |
| 151 | SC([C@@H]([NH3+])C(=O)[O-])(C)C                                                                                                                                                                                               |
| 152 | O(CC(O)C[NH2+])C(C)C)c1cccc1CC=C                                                                                                                                                                                              |
| 153 | Oc1ccc(cc1)CC[NH2+][C@H]([C@H](O)c1ccc(O)cc<br>1)C                                                                                                                                                                            |
| 154 | O(C(=O)c1ccc(NCCCC)cc1)CCOCCOCCOCCOCC<br>OCCOCCOCCOCCOCC                                                                                                                                                                      |



|     |                                                                                                                                                                                                     |
|-----|-----------------------------------------------------------------------------------------------------------------------------------------------------------------------------------------------------|
| 155 | s1c2S(=O)(=O)C(CC(NCC)c2cc1S(=O)(=O)N)C                                                                                                                                                             |
| 156 | Oc1cc(cc(O)c1)C(O)C[NH2+](C(C)C)C                                                                                                                                                                   |
| 157 | S1c2c(cc(cc2)C(F)(F)F)C(c2c1cccc2)=CCC[NH+]1C<br>CN(CC1)CCO                                                                                                                                         |
| 158 | Clc1ccc(N\C(=N)\C(=[NH+]\CCCCC\NH+)=C(\N=C<br>(\Nc2ccc(Cl)cc2)/N)/N)\N)cc1                                                                                                                          |
| 159 | O=C1N2C(=NC=C1c1n[n-]nn1)C(=CC=C2)C                                                                                                                                                                 |
| 160 | O=C1C=C2CCC3C([C@]2(C=C1)C)[C@@H](O)C[<br>C@]1(C3C[C@@H](C)[C@]1(C(=O)CC)C)C                                                                                                                        |
| 161 | O(C(=O)c1ccc(cc1)C)c1cc(ccc1OC(=O)c1ccc(cc1)C)<br>C(O)C[NH2+](C(C)C)C                                                                                                                               |
| 162 | s1ccc(C)c1C(=CCC[NH+]1C[C@@H](CCC1)C(=O)[<br>O-])c1sccc1C                                                                                                                                           |
| 163 | S(=O)(=O)(N)Cc1noc2c1cccc2                                                                                                                                                                          |
| 164 | O[C@@H]1CC(C[C@@H](O)C1)=C\C=C/1[C@@<br>H]2CC[C@H]([C@@H](\C=C\C[C@@H](C(O)(C)C)<br>C)C)[C@]2(CCC\1)C                                                                                               |
| 165 | S(=O)(=O)(CCn1c(ncc1[N+](=O)[O-])C)CC                                                                                                                                                               |
| 166 | OCCn1c(ncc1[N+](=O)[O-])C                                                                                                                                                                           |
| 167 | O=C1NN=C([C@@H](C1)C)c1ccc(NN=C(C#N)C#N<br>)cc1                                                                                                                                                     |
| 168 | O1[C@H](CO)[C@@H](O)[C@@H](O)[C@@H]1N<br>1C=NC(=NC1=O)N                                                                                                                                             |
| 169 | S(=O)([O-<br>)=(Nc1cc(ccc1)[C@@H](CC)C=1C(=O)C[C@](OC<br>=1O)(CCc1cccc1)CCC)c1ncc(cc1)C(F)(F)F                                                                                                      |
| 170 | [NH2+](CCCC12CCC(c3c1cccc3)c1c2cccc1)C                                                                                                                                                              |
| 171 | Oc1cccc1C(=O)[O-]                                                                                                                                                                                   |
| 172 | O(CC(COC(=O)N)c1cccc1)C(=O)N                                                                                                                                                                        |
| 173 | O(CC(O)C[NH2+](C(C)C)c1c2c([nH]cc2)ccc1                                                                                                                                                             |
| 174 | O1C(C)C(NC(=O)C=2C3=Nc4c(OC3=C(C)C(=O)C=<br>2N)c(ccc4C(=O)NC2C(OC(=O)C(N(C)C(=O)CN(C)<br>C(=O)C3N(CCC3)C(=O)C(NC2=O)C(C)C(C)C)C)<br>C(C(=O)NC(C)C)C(=O)N2C(CCC2)C(=O)N(CC(=O)<br>N)C)C(C(C)C)C1=O)C |
| 175 | [Se]=S                                                                                                                                                                                              |
| 176 | O=C([O-])CN(CC[NH+](CC(=O)[O-])CC(=O)[O-<br>)CC(=O)[O-]                                                                                                                                             |
| 177 | OC1(CCCCC1)C(C(OCC[NH+](C)C)=O)c1cccc1                                                                                                                                                              |
| 178 | O=C1CC[C@@H]2[C@@H]3[C@H]([C@@H]4CC<br>[C@H](OC(=O)CCc5cccc5)[C@]4(CC3)C)CCC2=<br>C1                                                                                                                |
| 179 | Oc1cc(ccc1O)CC[NH3+]                                                                                                                                                                                |
| 180 | O(C(=O)N(CC)C)c1cc(ccc1)[C@@H]([NH+](C)C)C                                                                                                                                                          |
| 181 | O1[C@@H](C)[C@@H](O)[C@@H]([NH3+])C[C<br>@@H]1O[C@@H]1c2c(C[C@](O)(C1)C(=O)CO)c(<br>O)c1c(C(=O)c3c(cccc3OC)C1=O)c2O                                                                                 |
| 182 | O=C(N)c1cc2c3C[C@H]([NH2+])CCc3[nH]c2cc1                                                                                                                                                            |
| 183 | O=C(Nc1c(cccc1)C)[C@H]1[NH+](CCCC1)CCCC                                                                                                                                                             |
| 184 | O=C1N=C(Nc2n(cnc12)COC(CO)CO)N                                                                                                                                                                      |
| 185 | S(OCCCCOS(=O)(=O)C(=O)(=O)C                                                                                                                                                                         |
| 186 | O=C(c1cc(ccc1)C(C(=O)[O-])C)c1cccc1                                                                                                                                                                 |
| 187 | Oc1cc([N+](CC)(C)C)ccc1                                                                                                                                                                             |
| 188 | FC(F)(F)c1cc(ccc1)CCC[NH2+][C@H](C)c1c2c(ccc<br>1)cccc2                                                                                                                                             |
| 189 | Oc1c2c(C[C@@H]3C(C(=O)[C@@]4(O)[C@@H](<br>C3)[C@H](N(C)C)C(=O)/C(=C(\O)/N)/C4=O)=C2[O<br>-])c(N(C)C)cc1                                                                                             |
| 190 | O1CC2=C(C=C3N(Cc4c3nc3c(c4)c(C[NH+](C)C)c(<br>O)cc3)C2=O)[C@@](O)(CC)C1=O                                                                                                                           |

|     |                                                                                                                                                                                                                                                                                    |
|-----|------------------------------------------------------------------------------------------------------------------------------------------------------------------------------------------------------------------------------------------------------------------------------------|
| 191 | O(C(=O)N)C1(CCCCC1)C#C                                                                                                                                                                                                                                                             |
| 192 | S(=O)(=O)(N(CCC)CCC)c1ccc(cc1)C(=O)[O-]                                                                                                                                                                                                                                            |
| 193 | S1c2c(N(c3c1cccc3)CCCN1CC[NH+](CC1)CCO)cc(<br>cc2)C(=O)CC                                                                                                                                                                                                                          |
| 194 | O=C/1C=C(C=C\C\C1=C\C=C1C=CC(C=C1)=C(N)N)<br>C(=[NH2+])N                                                                                                                                                                                                                           |
| 195 | [NH3+][C]12CC3(CC(C1)(CC(C3)C2)C)C                                                                                                                                                                                                                                                 |
| 196 | O1c2c3c4c(c(O)c2)C(O)=C(NC(=O)C(=C\C=C\ [C<br>@H](C)[C@@H](O)[C@H](C)[C@@H](O)[C@H](<br>C)[C@@H](OC(=O)C)[C@H](C)[C@@H](OC)C<br>=C\O[C@]1(C)C3=O)C)\C(=C/NN1CCN(CC1)C)\C4<br>=O                                                                                                    |
| 197 | O1[C@@H](Oc2ccc3c(OC([O-<br>)]=C(NC(=O)c4cc(CC=C(C)C)c(O)cc4)C3=O)c2C)[C<br>@H](O)[C@H](OC(=O)N)[C@@H](OC)C1(C)C                                                                                                                                                                   |
| 198 | S(P(OCC)(OCC)=O)CC[N+](C)(C)C                                                                                                                                                                                                                                                      |
| 199 | Fc1cc2c(N(C=C(C(=O)[O-<br>)C2=O)CC)cc1N1CC[NH2+](CC1                                                                                                                                                                                                                               |
| 200 | S(=O)([O-<br>)=(NC(=O)NC1CCCC1)c1ccc(cc1)CCNC(=O)c1nc<br>c(nc1)C                                                                                                                                                                                                                   |
| 201 | S1c2c(N(c3c1cccc3)CC([NH+](C)C)C)cccc2                                                                                                                                                                                                                                             |
| 202 | [NH2+][CCCCC1CC(C1CCCC1)C1CCCC1                                                                                                                                                                                                                                                    |
| 203 | O1C(=O)C=C([C@H]2CC[C@]3(O)[C@H]4[C@@<br>H](C)[C@@H](O)[C@]23C)[C@@]2([C@@H](C[C<br>@@H](O)[C@@H]3O[C@H](C)[C@@H](O)[C@@H<br>]5O[C@H](C)[C@@H](O)[C@@H]6O[C@H](C)[C<br>@@H](O)[C@@H]7O[C@H](CO)[C@@H](O)[C@<br>H](O)[C@H]7O)[C@@H](O)6)[C@@H](O)C5)[C<br>@@H](O)C3)CC2)CC4)C[CH-]1 |
| 204 | O=C([O-])CCC([NH3+])C=C                                                                                                                                                                                                                                                            |
| 205 | O(C(=O)C1(CC[NH+](CC1)CCC(C#N)(c1cccc1)c1<br>cccc1)c1cccc1)CC                                                                                                                                                                                                                      |
| 206 | O(C)c1cc(NC(CCC[NH3+])C)c2ncccc2c1                                                                                                                                                                                                                                                 |
| 207 | [N+][1](CCCC1)(CCCC[N+][1](CCCC1)C)C                                                                                                                                                                                                                                               |
| 208 | [NH+](Cc1c2c(ccc1)cccc2)(Cc1ccc(cc1)C(C)(C)C)C                                                                                                                                                                                                                                     |
| 209 | FC(F)(F)c1ccc(NC(=O)c2noc2)cc1                                                                                                                                                                                                                                                     |
| 210 | Oc1cc(ccc1O)[C@@H](O)C[NH2+](CCCCc1ccc(O)c<br>c1                                                                                                                                                                                                                                   |
| 211 | O(C)c1ccc(cc1)[C-]1C(=O)c2c(cccc2)C1=O                                                                                                                                                                                                                                             |
| 212 | S(=O)(=O)(C[C@](O)(C(=O)Nc1cc(C(F)(F)F)c(cc1)<br>C#N)C)c1ccc(F)cc1                                                                                                                                                                                                                 |
| 213 | Fc1cc2c3N(C=C(C(=O)[O-<br>)C2=O)[C@H](COc3c1N1CCN(CC1)C)C                                                                                                                                                                                                                          |
| 214 | Clc1c(S(=O)(=O)N)cc(S(=O)(=O)N)cc1Cl                                                                                                                                                                                                                                               |
| 215 | S1[C@H]2N(C(C(=O)[O-<br>)]=C(C1)\C=C\C)C(=O)[C@H]2NC(=O)[C@H]([NH<br>3+])c1ccc(O)cc1                                                                                                                                                                                               |
| 216 | O1C(C(CC(C(O)CC(=O)c2ccc(N)cc2)C)C)\C=C/C<br>=C\C=C/C=C\C=C/C=C\C=C/C(OC2O[C@H](C)[C<br>@@H](O)[C@H]([NH3+])[C@@H]2O)CC2OC(O)(<br>CC(O)C2C(=O)[O-<br>)CC(O)CC(O)CC(O)CC(=O)CCCC(=O)CC1=O)C                                                                                         |
| 217 | Clc1cc(Cl)ccc1C(OCc1c2c(sc1)c(Cl)ccc2)Cn1ccnc1                                                                                                                                                                                                                                     |
| 218 | Fc1ccc(cc1)[C@@]1(OCc2cc(ccc12)C#N)CCC[NH+<br>(C)C                                                                                                                                                                                                                                 |
| 219 | O1[C@@H](C)[C@@H](O)[C@@H]([NH3+])C[C<br>@@H]1O[C@@H]1c2c(C[C@](O)(C1)C(=O)C)c(O)<br>c1c(C(=O)c3c(cccc3)C1=O)c2O                                                                                                                                                                   |
| 220 | FC(F)(F)COc1ccc(OCC(F)(F)F)cc1C(=O)NCC1[NH2<br>+](CCCC1                                                                                                                                                                                                                            |

|     |                                                                                                                                                                                        |
|-----|----------------------------------------------------------------------------------------------------------------------------------------------------------------------------------------|
| 221 | O=C1N(CCC1)[C@H](CC)C(=O)N                                                                                                                                                             |
| 222 | C1CCN(N=O)C(=O)NC1CCCC1                                                                                                                                                                |
| 223 | FC(F)(F)c1cc(ccc1)\C(=N/OCCCC(=O)[O-])\c1cccnc1                                                                                                                                        |
| 224 | Fc1c(N2C[C@H]([NH2+][C@H](C2)C)C)c(F)c2N(C=C(C(=O)[O-])C(=O)c2c1N)C1CC1                                                                                                                |
| 225 | O1[C@@H](CC)[C@](O)(C)[C@H](O)[C@H](C)C(=O)[C@@H](C[C@](OC)(C)[C@H](O[C@@H]2O[C@@H](C[C@H]([NH+](C)C)[C@H]2O)C)[C@@H](C)[C@H](O[C@@H]2O[C@@H](C)[C@H](O)[C@](OC)(C2)C)[C@@H](C)C1=O)C  |
| 226 | O1c2c3c4c(c([O-])c2C)c([O-])c(NC(=O)C(=C)C=C\C[C@H](C)[C@H](O)[C@@H](C)[C@@H](O)[C@H](C)[C@H](OC(=O)C)[C@@H](C)[C@@H](OC)C=C\O[C@]1(C)C3=O)C)c1n2c(nc14)C=C(C=C2)C                     |
| 227 | O1[C@@]2([C@H](O[C@@H]1CCC)C[C@H]1[C@@H]3[C@@H]([C@@]4(C=CC(=O)C=C4)CC3)C)[C@@H](O)C[C@@]12C)C(=O)CO                                                                                   |
| 228 | O([C@H](C(C[C@@H]([NH+](C)C)C)(c1cccc1)c1cccc1)CC)C(=O)C                                                                                                                               |
| 229 | OC(CCC[NH+])1CCCC1)(c1cccc1)c1cccc1                                                                                                                                                    |
| 230 | O=C(N[C@@H](CC(=O)N)C(=O)N[C@H]([C@H](O)C[NH+])1CC2C(C[C@H]1C(=O)NC(C)C)CCC2)Cc1cccc1)c1nc2c(cc1)cccc2                                                                                 |
| 231 | o1nc(cc1C)C(=O)NNCc1cccc1                                                                                                                                                              |
| 232 | O1[C@@H]2C[C@H](O)[C@@]3([C@H]([C@H](OC(=O)c4cccc4)[C@@]4(O)C[C@H](OC(=O)[C@H](O)[C@@H](NC(OC(C)C)C)O)c5cccc5)C=C([C@@H](O)C3=O)C4(C)C)C)[C@@]2(OC(=O)C)C1)C                           |
| 233 | Ic1c(C(=O)NCC(O)CO)c(I)c(N(C(=O)C)CC(O)CN(C(=O)C)c2c(I)c(C(=O)NCC(O)CO)c(I)c(C(=O)NCC(O)CO)c2I)c(I)c1C(=O)NCC(O)CO                                                                     |
| 234 | Oc1ccc(N\N=C\2/C=C(C(=O)[O-])C(=O)C=C/2)cc1C(=O)[O-]                                                                                                                                   |
| 235 | Fc1cc2onc(c2cc1)C1CC[NH+](CC1)CCC=1C(=O)N2C(=NC=1C)C(O)CCC2                                                                                                                            |
| 236 | Fc1cc2c(NC(=O)/C/2=C\c2[nH]c(C)c(C(=O)NCC[NH+](CC)CC)c2C)cc1                                                                                                                           |
| 237 | S(=O)([O-])(=NC(=O)NN1CCCCC1)c1ccc(cc1)CCNC(=O)c1noc(c1)C                                                                                                                              |
| 238 | [BiH]1OC(=O)c2c(O1)cccc2                                                                                                                                                               |
| 239 | Oc1c2c(ccc1)[C@@](O)([C@@H]1C(C(=O)[C@@]3(O)[C@@H](C1)[C@H](N(C)C)C(=O)/C(=C(O)\N CN1CCCC1)/C3=O)=C2[O-])C                                                                             |
| 240 | S(=O)(=O)(N(CC(C)C)C[C@@H](OP(=O)([O-])[O-])[C@@H](NC(O[C@H]1CCOC1)=O)Cc1cccc1)c1ccc(N)cc1                                                                                             |
| 241 | O1[C@@H](C\C=C\C\C[C@H](O)[C@@H](C[C@H](CC=O)[C@H](O[C@@H]2O[C@H](C)[C@@H](O[C@@H]3O[C@@H](C)[C@H](OC(=O)CC(C)C)[C@](O)(C3)C)[C@H]([NH+](C)C)[C@H]2O)[C@@H](OC)[C@H](OC(=O)C)CC1=O)C)C |
| 242 | O1C(CC(OC)=CC1=O)C=C\C=C=1C=CCCC=1                                                                                                                                                     |
| 243 | C1c1cc2NC(N(S(=O)(=O)c2cc1S(=O)(=O)N)C)CSCC(F)(F)F                                                                                                                                     |
| 244 | S1C(SC1=C(C(=O)N)C(=O)[O-])C(=O)N[C@@]1(OC)C2SCC(CSc3nnnn3C)=C(N2C1=O)C(=O)[O-]                                                                                                        |
| 245 | s1cccc1CC(=O)NC1(OC)C2SCC(COC(=O)N)=C(N2                                                                                                                                               |

|     |                                                                                                                                                                                             |
|-----|---------------------------------------------------------------------------------------------------------------------------------------------------------------------------------------------|
|     | C1=O)C(=O)[O-]                                                                                                                                                                              |
| 246 | O(C(=O)C)[C@@H]1[C@@]2([C@H]([C@H]3[C@H](CC2)[C@@]2([C@H](C[C@H](OC(=O)C)[C@@H]([N+](4(CCCCC4)C)C2)CC3)C)C[C@@H]1[N+](CCCC1)C)C                                                             |
| 247 | O[C@@H]([C@@H]([NH2+])C)C)c1cccc1                                                                                                                                                           |
| 248 | [NH2+](CC#C)[C@@H]1CCc2c1cccc2                                                                                                                                                              |
| 249 | [Mg+]O                                                                                                                                                                                      |
| 250 | F[C@@H]1C2=CC(=O)C=C[C@@]2([C@@H]2[C@H]([C@@H]3C[C@H](C)[C@](O)(C(=O)CO)[C@@]3(C[C@@H]2O)C)C1)C                                                                                             |
| 251 | O1[C@]2([C@@H]3[C@H]([C@H]4[C@H]5[C@H](CC[C@]24C)[C@]2(CCC(=O)C=C2[C@H]2[C@@H]5C2)C)C3)CCCC1=O                                                                                              |
| 252 | Fc1cc(F)ccc1N1C=C(C(=O)[O-])C(=O)c2cc(F)c(N3CC([NH2+][CC3)C)cc12                                                                                                                            |
| 253 | O=C1NC(=O)N(c2ncn(c12)C)C                                                                                                                                                                   |
| 254 | s1cc(nc1N)/C(=C/CC(=O)[O-])C(=O)N[C@H]1[C@H]2SCC=C(N2C1=O)C(=O)[O-]                                                                                                                         |
| 255 | O1[C@@H](C[NH3+])[C@@H](O)[C@H](O)[C@@H]([NH3+])[C@H]1O[C@H]1[C@@H](O)[C@@H](O)[C@H]1CO)O[C@H]1[C@H](O)[C@H]2O[C@@H](CO)[C@@H](O)[C@H](O)[C@H]2[NH3+])[C@@H]([NH3+])C[C@@H]([NH3+])[C@@H]1O |
| 256 | O[C@H]1N2[C@@H]3C4[C@@H](C[C@H]2[C@@H]2N(c5c([C@@]2(C3)[C@H]4O)cccc5)C)[C@@H]1CC                                                                                                            |
| 257 | [NH+](CCCN(C1Cc2c(C1)cccc2)c1cccc1)(CC)CC                                                                                                                                                   |
| 258 | Fc1ccc(cc1)C(N1CCN(CC1)c1nc(nc1)NCC=C)NC=C)c1ccc(F)cc1                                                                                                                                      |
| 259 | s1cccc1CC[NH+])1CC(C)C(N(C(=O)CC)c2cccc2)CC1                                                                                                                                                |
| 260 | s1cccc1C(=CC([NH+](C)C)C)c1sccc1                                                                                                                                                            |
| 261 | [NH3+](C(Cc1c2c([nH]c1)cccc2)C                                                                                                                                                              |
| 262 | OC(C[NH+])1CCC(N(C(=O)CC)c2cccc2)CC1)c1cccc1                                                                                                                                                |
| 263 | O(CC)c1ccc(cc1)Cc1nc2cc([N+](=O)[O-])ccc2n1CC[NH+](CC)CC                                                                                                                                    |
| 264 | s1cccc1CC([NH+])1CCC(N(C(=O)CC)c2cccc2)CC1)C                                                                                                                                                |
| 265 | O=C1CC[C@@]2([C@@H]3[C@H]([C@@H]4CC[C@@](O)(C)[C@@]4(CC3)C)[C@@H](CC2=C1)C)C                                                                                                                |
| 266 | O(C)c1ccc(cc1)CC([NH3+])C                                                                                                                                                                   |
| 267 | O1CCN(CC1)CCC(C(OC)=O)(c1cccc1)c1cccc1                                                                                                                                                      |
| 268 | O=C1C=C[C@]2([C@H](C1)CC[C@H]1[C@@H]3CC[C@H](O)[C@]3(CC[C@@H]12)C)C                                                                                                                         |
| 269 | O(C)c1cc(ccc1)C(CC)(CC)CNC(=O)CCCCO                                                                                                                                                         |
| 270 | C1c1cc2c(N(C)C(=O)C(OC(=O)N(C)C)N=C2c2cccc2)cc1                                                                                                                                             |
| 271 | O1C(C[NH+]=C1N)c1cccc1                                                                                                                                                                      |
| 272 | O[C@@H](C(C[C@H]([NH+](C)C)C)(c1cccc1)c1cccc1)CC                                                                                                                                            |
| 273 | O=C([O-])C1(CC[NH+](CC1)CCC(C#N)(c1cccc1)c1cccc1)c1cccc1                                                                                                                                    |
| 274 | O([C@H](C(C[C@H]([NH+](C)C)C)(c1cccc1)c1cccc1)CC)C(=O)C                                                                                                                                     |
| 275 | O[C@H]1C[C@H]2[NH+](C)[C@H](CC2)[C@H]1C(=O)[O-])C                                                                                                                                           |
| 276 | C1c1cccc1CC([NH3+](C)C                                                                                                                                                                      |

|     |                                                                                                                           |
|-----|---------------------------------------------------------------------------------------------------------------------------|
| 277 | s1cccc1C(=CC([NH+](CC)CC)C)c1sccc1                                                                                        |
| 278 | Clc1cc2c(NC(=O)C(N=C2c2cccc2F)C(OCC)=O)cc1                                                                                |
| 279 | [NH2+](C(Cc1cccc1)C)CCC#N                                                                                                 |
| 280 | O([C@@H](C(C[C@H]([NH+](C)C)C)(c1cccc1)c1cccc1)CC)C(=O)C                                                                  |
| 281 | Clc1cccc1C1=NCC(=O)N(c2sc(cc12)CC)C                                                                                       |
| 282 | O1[C@@H]2[C@]34[C@H]([C@H]([N+](O-)])(CC3)C)Cc3c4c1c(OC)cc3)C=C[C@@H]2O                                                   |
| 283 | O=C1C=C2CC[C@@H]3[C@@H]([C@]2(C=C1C=O)C)[C@H](O)C[C@]1([C@H]3CC[C@@]1(O)C)C                                               |
| 284 | Clc1cc2c(N(C)C(=O)CN3C2(OC(=CC3=O)C)c2cccc2)cc1                                                                           |
| 285 | Clc1cc2c(N(CC3CC3)C(=O)CN=C2c2cccc2)cc1                                                                                   |
| 286 | [Zn]                                                                                                                      |
| 287 | O=C1Nc2c(cc([N+](=O)[O-])cc2)C(=NC1)c1cccc1                                                                               |
| 288 | S(C(Sc1cc(C(C)C)C)c(O)c(c1)C(C)(C)C)c1cc(C(C)(C)C)c(O)c(c1)C(C)(C)C                                                       |
| 289 | S1(=O)(=O)C2N(C(C(=O)[O-])C1(Cn1nnc1)C)C(=O)C2                                                                            |
| 290 | S1[C@H]2N([C@@H](C(=O)[O-])C1(C)C)C(=O)[C@H]2NC(=O)[C@H](C(=O)[O-])c1ccsc1                                                |
| 291 | [NH+](CCCc1cccc1)(CCCc1cccc1)CC                                                                                           |
| 292 | O1CCN(CC1)CC1CCc2[nH]c(C)c(c2C1=O)CC                                                                                      |
| 293 | [NH+](CCC(c1cccc1)c1ncccc1)(C)C                                                                                           |
| 294 | S1c2c(N(c3c1cccc3)CCC[NH+]1CCC(CC1)CCO)cc(S(=O)(=O)N(C)C)cc2                                                              |
| 295 | S(C)[C@H]1O[C@H]([C@H](NC(=O)C2[NH+](C[C@@H](C2)CCC)C)[C@H](O)C)[C@H](O)[C@H](O)[C@H]1O                                   |
| 296 | OC[C@@H](O)[C@@H](O)[C@H](O)[C@@H](O)CO                                                                                   |
| 297 | P(OC[C@H]1O[C@@H](N2C=C(C)C(=O)NC2=O)C[C@@H]1O)(=O)([O-])[O-]                                                             |
| 298 | O1C[C@H]2O[C@@H](OC)[C@H](O)[C@@H](O)[C@H]2O[C@@]1(C(=O)[O-])C                                                            |
| 299 | OC1=CC(=O)C(C\C1=NC1CC1c1cccc1)CC([NH3+])C(=O)[O-]                                                                        |
| 300 | [Ru+2]123(N4C(C=C(C=C4)CCCCCCCC(=O)NC4C5CC6CC4CC(C5)C6)=C4N1C=CC(=C4)C)(N1C(=C4N2C=CC=C4)C=CC=C1)N1C(=C2N3C=CC=C2)C=CC=C1 |
| 301 | O1[N-]C(=O)C(=C1)C[C@H]([NH3+])C(=O)[O-]                                                                                  |
| 302 | Oc1nc(nc2[nH]nnc12)N                                                                                                      |
| 303 | [Hg](O)c1ccc(cc1)C(=O)[O-]                                                                                                |
| 304 | O=C([O-])\C=C\C(=O)[O-]                                                                                                   |
| 305 | O=C(NC(CC(C)C)C(=O)NC(Cc1cccc1)C(=O)C(NC(=O)NC(Cc1cccc1)C(=O)[O-])C1NC(=[NH2+])NCC1                                       |
| 306 | O=C([O-])[C@@H]([NH3+])CCC\NH+=C(N(C)C)/N                                                                                 |
| 307 | O1C(CO)C(O)C(O)C(O)C1OC1C(O)C(O)C(OC1CO)O                                                                                 |
| 308 | Oc1ccc(cc1)C                                                                                                              |
| 309 | SCC(O)C(O)CS                                                                                                              |
| 310 | P(OCC1OC(n2nc(nc2)C(=O)N)C(O)C1O)(=O)([O-])[O-]                                                                           |
| 311 | OC(C(O)C(=O)[O-])C(=O)[O-]                                                                                                |
| 312 | P(O)(=O)([O-])CCCC(=O)NO                                                                                                  |
| 313 | O=C1NC(=O)NC=2NC(=O)NC1=2                                                                                                 |

|     |                                                                                                                                                                                            |
|-----|--------------------------------------------------------------------------------------------------------------------------------------------------------------------------------------------|
| 314 | O1C(COC2OC(C)C(O)C(O)C2O)C(O)C(O)C(O)C1O<br>C1=C(Oc2c(C1=O)c(O)cc([O-])c2)c1cc(O)c(O)cc1                                                                                                   |
| 315 | Oc1ccc(cc1O)CC(=O)[O-]                                                                                                                                                                     |
| 316 | Oc1cc(O)ccc1\C=C\C(=O)[O-]                                                                                                                                                                 |
| 317 | P(OCC(O)COC(=O)CCCCCCCCCCC)(OCC[N+](C)(C)C(=O)[O-])                                                                                                                                        |
| 318 | P(OC(C(=O)[O-])CO)(=O)([O-])[O-]                                                                                                                                                           |
| 319 | S1CC(N(S(=O)(=O)c2ccc(cc2)C)CC1)C(=O)NC(Cc1cccc1)C(OCC)=O                                                                                                                                  |
| 320 | O=C([O-])CCCCC([NH3+])C([NH3+])C                                                                                                                                                           |
| 321 | [N+](CCCCCCCCCCCCCCC)(C)(C)C                                                                                                                                                               |
| 322 | OC(C(CC(=O)[O-])C(=O)[O-])C(=O)[O-]                                                                                                                                                        |
| 323 | P(OCC(OC(=O)CCCCCCCCCCCCCCC)COC(=O)C<br>CCCCCCCCCCCCC)(OCC[NH3+])(=O)[O-]                                                                                                                  |
| 324 | P(OC(C(=O)[O-])C(=O)([O-])[O-])                                                                                                                                                            |
| 325 | ClCC([NH3+])C(=O)[O-]                                                                                                                                                                      |
| 326 | O=C([O-])C([NH3+])C(CC)C                                                                                                                                                                   |
| 327 | [Se]=1=C(CCC)C(=NC=1N)CCCC                                                                                                                                                                 |
| 328 | Oc1cc2C=C(NC(=O)CCC(=O)[O-])C3N(c2cc1O)C(CCN3)C(=O)NC(C(=O)NC(CCCN<br>C(=[NH2+])N)C(=O)NC(C(=O)NC(CCCN(O)C=O)<br>(=O)NC1CCCCNC(=O)C(NC(=O)C(NC(=O)C(NC1<br>=O)CCCN(O)C=O)C(O)C)C(O)C)CO)CO |
| 329 | O=C([O-])Cc1c2c(ccc1)cccc2                                                                                                                                                                 |
| 330 | O1C(C(O)C(O)CO)C(NC(=O)C)C(O)CC1(Oc1cc2O<br>C(=O)C=C(c2cc1)C)C(=O)[O-]                                                                                                                     |
| 331 | C1CCC(C)=C(\C=C\C=C\C=C\C=C\C)C1(C)C                                                                                                                                                       |
| 332 | OC(C(CO)(C)C)C(=O)NCCC(=O)[O-]                                                                                                                                                             |
| 333 | S(=O)(=O)(N)c1ccc(F)cc1                                                                                                                                                                    |
| 334 | OC1C([NH3+])C=C(CC1O)CO                                                                                                                                                                    |
| 335 | Clc1ccc(NC2=C(c3cc(Cl)ccc3)C(=O)NC2=O)cc1C(=O)[O-]                                                                                                                                         |
| 336 | O=C([O-])c1ccnc1C(=O)[O-]                                                                                                                                                                  |
| 337 | O=C([O-])C([NH3+])C=C                                                                                                                                                                      |
| 338 | P(OC(C)C)(OCC(N)C(=O)[O-])(=O)[O-]                                                                                                                                                         |
| 339 | [AsH](SCC([NH3+])C(=O)[O-])O                                                                                                                                                               |
| 340 | n1enc2n(nc(c2c1N)-c1ccc(cc1)C)C(C)(C)C                                                                                                                                                     |
| 341 | P(OCc1enc(C)c(O)c1C[NH2+])C(CCC(=O)[O-]<br>C(=O)[O-])(=O)([O-])[O-]                                                                                                                        |
| 342 | O(C(CCCCCCCCCCCC)CC(=O)[O-]<br>C(=O)CCCCCCCCCCC                                                                                                                                            |
| 343 | O=C(N)C(NC(=O)C([NH3+])CCNC(N[N+](=O)[O-]<br>)=N)CC[NH3+]                                                                                                                                  |
| 344 | P(=O)([O-])([O-])c1cc(ccc1P(=O)([O-])[O-]<br>)]CC(NC(=O)C)C(=O)NC1CCCCc2c1cc(C(=O)N)c(<br>OCC1CCCCC1)c2                                                                                    |
| 345 | FC(CC([NH3+])C(=O)[O-])CCNC(=[NH2+])C                                                                                                                                                      |
| 346 | O1C(O)C(O)C(O)CC1C                                                                                                                                                                         |
| 347 | c1cccc1CCCC                                                                                                                                                                                |
| 348 | [CaH]OC(C(CC(=O)[O-])C(=O)[O-])C(=O)[O-]                                                                                                                                                   |
| 349 | O(C(Cc1cccc1)C(\C=C\C=C\C([NH3+])C(C(=O)[O-]<br>-])C)/C)C                                                                                                                                  |
| 350 | O1c2c(C(=O)C(O)=C1c1ccc(O)cc1)c(O)cc([O-])c2                                                                                                                                               |
| 351 | O=C([O-])CCCCC(=O)[O-]                                                                                                                                                                     |
| 352 | SC1C(O)C(O)C(S)OC1CO                                                                                                                                                                       |
| 353 | S(OC1C(O)C(NC(=O)C)C(OC1CO)O)(=O)(=O)[O-]                                                                                                                                                  |
| 354 | O=C(c1[nH]c2cc(ccc2n1)C(=[NH2+])N)c1[nH]c2cc(<br>ccc2n1)C(=[NH2+])N                                                                                                                        |
| 355 | S(CCC([NH3+])C(O)(O)c1ncccc1)C                                                                                                                                                             |

|     |                                                                                         |
|-----|-----------------------------------------------------------------------------------------|
| 356 | S(CCC(NC(=O)C1N(CCC1)C(=O)C(NC(=O)CS)Cc1ccc(O)cc1)C(=O)N)C                              |
| 357 | O1C(CO)C(O)C(O)C(O)C1=O                                                                 |
| 358 | O(Cc1cccc1)C(=O)NC(C(=O)NC(C(C)C)C(=O)NC(Cc1cccc1)CO)C                                  |
| 359 | O=C1C2(C(=O)C(C)C)C(CCC=C(C)C)(C)C(CC1(C=C(C)C)C(=O)C(CC=C(C)C)=C2[O-])CC=C(C)C         |
| 360 | P(=O)([O-])([O-])c1cc(ccc1OCC(=O)[O-])CC(NC(=O)C)C(=O)NC1CCCCN(Cc2ccc(cc2)-c2cccc2)C1=O |
| 361 | OC(C(O)C(O)C=O)C(O)CO                                                                   |
| 362 | S(O)CC([NH3+])C(=O)[O-]                                                                 |
| 363 | [Te](CC(=O)[O-])C                                                                       |
| 364 | OC(C(CO)(C)C)C(=O)[O-]                                                                  |
| 365 | SC[C@H](NC(=O)CC(=O)[O-])Cc1cccc1                                                       |
| 366 | O(C(=O)c1ccc(cc1)C(=O)c1cccc1O)C1CCC[NH2+]CC1NC(=O)c1ccc(O)cc1                          |
| 367 | O(C(=O)C1N(CCC1)C(=O)C(=O)C(CC)(C)C)CCCc1ccncl                                          |
| 368 | Clc1cc(O)ccc1                                                                           |
| 369 | OB(O)CCc1cccc1                                                                          |
| 370 | s1c2S(=O)(=O)N(CC(O)c2cc1S(=O)(=O)N)c1ccc(OC)cc1                                        |
| 371 | S(CC([NH3+])C(=O)[O-])C1NOC(=C1)C([NH3+])C(=O)[O-]                                      |
| 372 | Nc1c2c(cc3c(c2)cccc3)ccc1                                                               |
| 373 | Oc1nc(nc2n(c[n+](c12)C)C)N                                                              |
| 374 | O[B-](O)(O)CCCC([NH3+])C(=O)[O-]                                                        |
| 375 | Fe1cccc(N)c1C                                                                           |
| 376 | s1c[n+](Cc2nc(nc2N)C)c(C)c1CCOP(OP(=O)([O-])[O-])(=O)[O-]                               |
| 377 | [NH2+]1CCN(C[C@H]1Cc1cccc1)c1nnc(c(c1)-c1ccncc1)-c1cc2c(cc1)cccc2                       |
| 378 | P(OCc1nc(C)c(O)c1C[NH2+]C(C(=O)[O-])C(=O)([O-])[O-]                                     |
| 379 | o1c2c(cc1C[NH+])1CC(N(CC1)CC(O)CC(Cc1cccc1)C(=O)NC1c3c(CC1O)cccc3)C(=O)NC(C)(C)C)cccc2  |
| 380 | Fe1ccc(cc1-c1onc(c1)C(=O)[O-])\C=C\COc1cccc(O)c1C(OC)=O                                 |
| 381 | O1C(CO)C(O)C(O)C(O)C1OC1C(O)C(O)c2n(ccn2)C1CO                                           |
| 382 | O=C(Cc1ccc(cc1)C(=[NH2+])N)C(=O)[O-]                                                    |
| 383 | Oc1c2c(Cc3c(C2=O)c(O)ccc3)ccc1CC(=O)[O-]                                                |
| 384 | OCc1nc(nc1N)C                                                                           |
| 385 | O=C([O-])CCc1cccc1                                                                      |
| 386 | O=[N+](O-)]NC(NCCCC([NH3+])CNCC[NH3+])=N                                                |
| 387 | S1c2c(NC(=O)C1CC(=O)NO)cccc2                                                            |
| 388 | P(OCc1nc(C)c(O)c1C[NH2+]C1CO[N-]C1=O)(=O)([O-])[O-]                                     |
| 389 | P(OCC(OC(=O)CCCCCCCCCCCCC)COC(=O)CCCCCCCCCCCCC)(OCC(O)CO)(=O)[O-]                       |
| 390 | [NH2+]=C(n1ncn1)N                                                                       |
| 391 | Clc1ccc(Oc2ccc(S(=O)(=O)C3(CCOCC3)CC(=O)NO)cc2)cc1                                      |
| 392 | P(OCC(O)C(O)C(O)CO)(=O)([O-])[O-]                                                       |
| 393 | O=C1Nc2c(ccc2)C1Cc1ccc(N2CCN(CC2)C=O)cc1                                                |
| 394 | BrC1cc(cc-c2[nH]c3cc(ccc3n2)C(=[NH2+])N)c1[O-])C(CC(=O)[O-])C(=O)[O-]                   |
| 395 | S(=O)(=O)(N)c1ccc(cc1)C(=O)NCc1cccc1F                                                   |

|     |                                                                                                                              |
|-----|------------------------------------------------------------------------------------------------------------------------------|
| 396 | O=C([O-])C1([NH3+])CC1                                                                                                       |
| 397 | [As+](c1ccc(O)c(O)cc1)(c1cccc1)(c1cccc1)c1cccc1                                                                              |
| 398 | O=C1N(CCCCC1NC(=O)C(C(CCCO)C(=O)NO)CC(C)C)CCOC                                                                               |
| 399 | s1cccc1CC(=O)NCB(O)O                                                                                                         |
| 400 | O1C(CO)C(O)C(O)C1N1C=CC(=NC1=O)N                                                                                             |
| 401 | [NH3+]C(CC(C)C)C                                                                                                             |
| 402 | [nH]1c2c(ncnc2C)nc1                                                                                                          |
| 403 | OC1C=CC=C(C(=O)[O-])C1[NH3+]                                                                                                 |
| 404 | P(OCCCCN1C2=C(NC(=O)NC2=O)N(CC(O)C(O)C(O)CO)C1=O)(=O)([O-])[O-]                                                              |
| 405 | S1CC(CCC(NC(=O)CCC(NC(=O)C)C(=O)[O-])C(=O)NC(C(=O)NC(C(=O)[O-])C)C)=C([NH2+]C1C(NC(=O)Cc1cccc1)C(=O)[O-])C(=O)[O-]           |
| 406 | [Mo-2]1(SC2=C(S1)C1Nc3c(nc(nc3O)N)NC1OC2COP(OP(OCC1OC(N2C=CC(=NC2=O)N)C(O)C1O)(=O)[O-])(=O)[O-])([OH2+])([OH2+])O            |
| 407 | P(OCC1OC2([N-]C(=O)NC2=O)C(O)C1O)(=O)([O-])[O-]                                                                              |
| 408 | S(CC1[NH2+]C(C(O)C1O)c1c2N=CNC(N)c2[nH]c1)C                                                                                  |
| 409 | O=C1C2C(Nc3c2cccc3)C2N(C1)CCCC2                                                                                              |
| 410 | S(=O)(=O)(Cc1cccc1)CCC(NC(=O)C(NC(OCc1ccc)cc1)=O)Cc1cccc1)CCc1cccc1                                                          |
| 411 | OCCCCCO                                                                                                                      |
| 412 | S(=O)(=O)([O-])CCC[NH2+]C1CCCCC1                                                                                             |
| 413 | S=P([S-])(OCC(OC(=O)CCCC)COC(=O)CCCC)OCC[N+](C)(C)C                                                                          |
| 414 | S(CCC(=O)C(=O)[O-])C                                                                                                         |
| 415 | O=C(CCC(=O)[O-])C                                                                                                            |
| 416 | S(=O)(=O)\C=C\NC(=O)C(NC(=O)N1CCC(N2COCC2)CC1)Cc1cccc1)CCC)c1cccc1                                                           |
| 417 | Ic1cccc1                                                                                                                     |
| 418 | O1C(CO)C(O)CC1N1C=CC(=O)NC1=O                                                                                                |
| 419 | BrC1cc(cc(Br)c1[O-])C(=O)c1c2c(oc1CC)cc(S(=O)([O-])=Nc1ccc(S(=O)(=O)N)cc1)cc2                                                |
| 420 | O=C(CCCCCC(=O)[O-])CCC(=O)[O-]                                                                                               |
| 421 | P(OCC(OC(=O)C)COCCCCCCCCCCCCC)(OC C[N+](C)(C)C)(=O)[O-]                                                                      |
| 422 | O=C([O-])Cc1c(c[nH]c1C[NH3+])CCC(=O)[O-]                                                                                     |
| 423 | O=C1N(CC=O)C(=NC1CC1C=CC(=O)C=C1)C[NH3+]                                                                                     |
| 424 | S(CC1OC(n2c3ncnc(N)c3nc2)C(O)C1O)C                                                                                           |
| 425 | O=C([O-])C([NH3+])Cc1c2c([nH]c1)cccc2N                                                                                       |
| 426 | O=C(N)C(NC(=O)C([NH2+]C(Cc1cccc1)C(=O)[O-])Cc1cccc1)CC(=O)[O-]                                                               |
| 427 | P(OC1OC(CO)C(O)C(OC(C(=O)NC(C(=O)NC(CCC(=O)[O-])C(=O)[O-])C)C)C1NC(=O)C)(OP(OCC1OC(N2C=CC(=O)NC2=O)C(O)C1O)(=O)[O-])(=O)[O-] |
| 428 | P(OC1C(O)C(OC1n1c2ncnc(N)c2nc1)COP(OP(OCC1OC(N2C=C(CC(O)C2O)C(=O)N)C(O)C1O)(=O)[O-])(=O)[O-])([O-])[O-]                      |
| 429 | O(C(=O)CCC(=O)[O-])C1CCC2(C3C(CCC2C1(C)C)(C)C1(C(C2CC(CCC2(C1)C)C(=O)[O-])C)=CC3=O)C)C                                       |
| 430 | Clc1cc(Cl)ccc1C(=O)N(Cc1sc(cc1)-                                                                                             |

|     |                                                                                                                                                                                                                                                                                                                                                               |
|-----|---------------------------------------------------------------------------------------------------------------------------------------------------------------------------------------------------------------------------------------------------------------------------------------------------------------------------------------------------------------|
|     | c1oc2c(c1)cccc2)C(Cc1cccc1)C(=O)[O-]                                                                                                                                                                                                                                                                                                                          |
| 431 | S1CC[NH+]=C1N                                                                                                                                                                                                                                                                                                                                                 |
| 432 | O1C(C(O)C(O)CO)C(NC(=O)C)C(O)CC1(O)C(=O)[O-]                                                                                                                                                                                                                                                                                                                  |
| 433 | Oc1ccc(cc1)C[C@H](NC(=O)[C@@H](NC(=O)[C@@H](NC(=O)[C@H]1N(CCC1)C(=O)[C@@H](NC(=O)[C@@H](NC(=O)[C@@H](NC(=O)[C@@H](NC(=O)CNC(=O)CNC(=O)CNC(=O)CNC(=O)[C@H]1N(CCC1)C(=O)[C@@H](NC(=O)[C@H]1N(CCC1)C(=O)[C@H]([NH3+])Cc1cccc1)CCCNC(=[NH2+])N)CC(=O)N)CC(=O)[O-])Cc1cccc1)CCC(=O)[O-])CCC(=O)[O-][C@H](CC)C)CCC(=O)[O-])CCC(=O)[O-]C(=O)N[C@@H](CC(C)C)C(=O)[O-] |
| 434 | S(=O)(=O)([O-])NC1C(O)C(OC2OC(=CC(O)C2OS(=O)(=O)[O-])C(=O)[O-])C(OC1O)CO                                                                                                                                                                                                                                                                                      |
| 435 | [NH2+]=C(N)c1ccc(NC2nc3ccc(ccc3n2)C)n2c3c(nc2)cccc3)cc1                                                                                                                                                                                                                                                                                                       |
| 436 | P(OCC(N)C(=O)[O-])(OCC)(OCC)=O                                                                                                                                                                                                                                                                                                                                |
| 437 | Clc1cc2[nH]c(nc2cc1C(=[NH2+])N)-c1cccc(-c2cccc2)c1O                                                                                                                                                                                                                                                                                                           |
| 438 | O=C(NC(CCCNC(=O)N)C(=O)[O-])C                                                                                                                                                                                                                                                                                                                                 |
| 439 | [W-]([OH2+])(OCC1OC(n2c3ncnc(N)c3nc2)C(O)C1O)(O)O                                                                                                                                                                                                                                                                                                             |
| 440 | OC1C(O)Cn2c(ncc2)C1O                                                                                                                                                                                                                                                                                                                                          |
| 441 | O=C1NC(=Nc2ncc(nc12)C(O)C(O)CO)N                                                                                                                                                                                                                                                                                                                              |
| 442 | Brc1c2nc3c(cccc3C(=O)NCC[NH+](C)C)c(N)c2ccc1                                                                                                                                                                                                                                                                                                                  |
| 443 | O1C2CC(O)C(O)C(O)C12CO                                                                                                                                                                                                                                                                                                                                        |
| 444 | O=C1c2c(nc(C)c(CCCO)c2CO)C(=O)C=C1N1CC1                                                                                                                                                                                                                                                                                                                       |
| 445 | [NH2+](CC)C                                                                                                                                                                                                                                                                                                                                                   |
| 446 | O(c1c2c(nc(nc2N)N)ccc1)c1ccc(OC)cc1                                                                                                                                                                                                                                                                                                                           |
| 447 | SCCOCCOCCOCCOCCOCCO                                                                                                                                                                                                                                                                                                                                           |
| 448 | BrCCCCCCCCCCCC(=O)[O-]                                                                                                                                                                                                                                                                                                                                        |
| 449 | [NH2+]1CC2CCC1(C)C2(C)C                                                                                                                                                                                                                                                                                                                                       |
| 450 | s1c(CCOP(OP(=O)([O-])[O-])(=O)[O-])c[n+](c1C(=O)C)[CH-]c1cnc(nc1N)C)C                                                                                                                                                                                                                                                                                         |
| 451 | O(C(=O)N)C1/C(=C\C(C)C(O)C(OC)CC(CC2=C(OC)C(=O)C=C(NC(=O)/C(=C\C=C/C1OC)/C)C2=O)C)/C                                                                                                                                                                                                                                                                          |
| 452 | O(C(=O)CCCCCCCC)CCCCCCCCCCCCCCCC                                                                                                                                                                                                                                                                                                                              |
| 453 | S(=O)(=O)(N)c1ccc(cc1)C(=O)NCc1ccc(F)cc1                                                                                                                                                                                                                                                                                                                      |
| 454 | P(OP(OP(OCC1OC(N2C=CC(=NC2=O)N)C(O)C1O)(=O)[O-])(=O)[O-])(=O)([O-])[O-]                                                                                                                                                                                                                                                                                       |
| 455 | s1c(ccc1C)C\1CC2OC(O)(C(=O)C(=O)N3C(CCCC3)C(OC(CC(=O)C)\C=C(\C)/C(O)C(OC)C(=O)C(CC\C=C/C=C\C=C/1C)C)C)C(CC1CC(OC)C(O)CC1)C(=O)C(CC2)C                                                                                                                                                                                                                         |
| 456 | O1C2([N-]C(=O)N(O)C2=O)C(O)C(O)C(O)C1CO                                                                                                                                                                                                                                                                                                                       |
| 457 | P(OP(OP(OCC1OC(N2C=C(C)C(=O)NC2=O)CC1O)(=O)[O-])(=O)[O-])(=O)([O-])[O-]                                                                                                                                                                                                                                                                                       |
| 458 | P(OCC1OC(N2C=CC(=NC2=O)N)C(O)C1O)(=O)([O-])[O-]                                                                                                                                                                                                                                                                                                               |
| 459 | O=C([O-])CC1(C)C2([NH2+])C(C1CCC(=O)[O-])=C(C1=N\C(=C/C3=N\C(=C/C4=NC2C(CC(=O)[O-])C4(CCC(=O)[O-])C)\C(CCC(=O)[O-])C3(C)C)\C(CCC(=O)[O-])C1(CC(=O)[O-])C)C                                                                                                                                                                                                    |
| 460 | S(=O)(CCC([NH3+])C(=O)[O-])C                                                                                                                                                                                                                                                                                                                                  |
| 461 | S(CC([NH3+])C(=O)[O-])CC(=O)[O-]                                                                                                                                                                                                                                                                                                                              |

|     |                                                                                              |
|-----|----------------------------------------------------------------------------------------------|
| 462 | P(OC(C(N)C(=O)[O-])C(=O)([O-])[O-])                                                          |
| 463 | P(OC1(OC(C(O)C(O)CO)C(NC(=O)C)C(O)C1)C(=O)[O-])(OCC1OC(N2C=CC(=NC2=O)N)C(O)C1O)(=O)[O-]      |
| 464 | S(SCCO)CCO                                                                                   |
| 465 | OC1(N=C(CC(C)C)C(=O)N1CC=O)C(N)C(O)C                                                         |
| 466 | Oc1nc(nc2n(cnc12)C)N                                                                         |
| 467 | OC(Cc1cccc1)C(=O)[O-]                                                                        |
| 468 | P(OCC(O)C(O)C(=O)C(=O)([O-])[O-])                                                            |
| 469 | O=C(NC(CCCNC(=[NH2+])N)C(=O)[O-])CCC(=O)[O-]                                                 |
| 470 | OB(O)c1ccc(cc1)\C=C\C(=O)[O-]                                                                |
| 471 | O(c1cccc(-c2[nH]c3cc(ccc3n2)C(=[NH2+])N)c1O)C1CCCC1                                          |
| 472 | Oc1cccc1CC=C                                                                                 |
| 473 | O=C(Nc1nc(ccn1)-c1n2c(nc1C)C=CC=C2)C                                                         |
| 474 | S(CC)C(=[NH2+])N                                                                             |
| 475 | OCCCC[NH3+]                                                                                  |
| 476 | O=C([O-])c1[nH]ccc1                                                                          |
| 477 | O=C(Nc1cccc1)CCCCCCC(=O)NO                                                                   |
| 478 | P(OCC(O)C(O)C(O)C(O)CO)(=O)([O-])[O-]                                                        |
| 479 | P(OC1OC(C)C(O)C(O)C1O)(=O)([O-])NC(CC(C)C)C(=O)NC(Cc1c2c([nH]c1)cccc2)C(=O)[O-]              |
| 480 | [NH3+][C1NC(NC2C1CC(CC2)C[NH+])1C2C(CCCC2)CC1)N                                              |
| 481 | Clc1cccc(Cl)c1C1=Cc2c(nc(nc2)Nc2ccc(SC)ccc2)N(C)C1=O                                         |
| 482 | O=C([O-])C([NH3+])CCCC=O                                                                     |
| 483 | O(CCOCCO)CCOCCO                                                                              |
| 484 | OC(C[NH3+])C                                                                                 |
| 485 | Clc1c(ccc(OCc2oc(cc2)C(=O)[O-])c1Cl)-c1nn(C)c(c1)C1CCN(CC1)C(=O)CNC(=O)C(NC(=[NH2+])N)CC(C)C |
| 486 | S(C(NC(=O)CCCC([NH3+])C(=O)[O-])C(=O)NC(C(C)=C)C(=O)[O-])                                    |
| 487 | O1C2N(C(=O)C2(OC)NC(=O)C(C(=O)[O-])c2ccc(O)cc2)C(C(=O)[O-])=C(C1)C                           |
| 488 | P(O)(=O)([O-])CC1CC(O)(CC(O)C1O)C(=O)[O-]                                                    |
| 489 | O1C(CC=2Oc3c(c(C(=O)[O-])c(O)c([O-])c3)C(=O)C=2C1OC)C                                        |
| 490 | O(CC1CCCCC1)c1nc(N)cc2nc[nH]c12                                                              |
| 491 | P(O)(=O)([O-])CC(OCC1OC(n2c3ncnc(N)c3nc2)C(O)C1O)=O                                          |
| 492 | OC(C(NC(=O)C)CO)c1ccc([N+](=O)[O-])cc1                                                       |
| 493 | S(=O)(=O)(N)c1ccc(cc1)C(=O)NCc1c(F)c(F)c(F)c1F                                               |
| 494 | O1C(CO)C(O)C(O)C(NC(=O)C)C1OC                                                                |
| 495 | [O-][N+](CCCCCCCCC)(C)C                                                                      |
| 496 | S1c2cc(O)ccc2OC(C1c1ccc(O)cc1)c1ccc(OCC([NH+])2CCCC2)cc1                                     |
| 497 | s1c(ccc1CNc1[nH]c2c(n1)cccc2)-c1nc(sc1)[NH+]=C(N)N                                           |
| 498 | Clc1cc(Cl)ccc1C(O)(CCCCC)Cn1ccnc1                                                            |
| 499 | S(=O)(=O)([O-])CCC[N+](CC)(C)C                                                               |
| 500 | O=C([O-])c1cccc1NC(=O)C(=O)[O-]                                                              |
| 501 | P(OP(OCC1OC(n2c3N=C(NC(=O)c3nc2)N)C(O)C1O)(=O)[O-])(=O)([O-])N                               |
| 502 | O=C([O-])C(CCCC)CN(O)C=O                                                                     |

|     |                                                                                                                                                                                                                              |
|-----|------------------------------------------------------------------------------------------------------------------------------------------------------------------------------------------------------------------------------|
| 503 | <chem>O1C(C)(C2C(OC)C(OC(=O))C=C\C=C\C=C\C=C\C(=O)[O-])CCC2(O)C)C1CC=C(C)C</chem>                                                                                                                                            |
| 504 | <chem>O1C(CO)C(O)C(O)C(O)C1OCCC1OC1</chem>                                                                                                                                                                                   |
| 505 | <chem>O=C(Nc1n[nH]c(c1)C1CC1)c1cccc1</chem>                                                                                                                                                                                  |
| 506 | <chem>O=C(N)CC(=O)[O-]</chem>                                                                                                                                                                                                |
| 507 | <chem>O=C([O-])C(NC(=O)NO)Cc1cccc1</chem>                                                                                                                                                                                    |
| 508 | <chem>O=C([O-])C([NH3+])CC(=O)[O-]</chem>                                                                                                                                                                                    |
| 509 | <chem>[Co]123[N+]=C5C(CCC(=O)N)C(CC(=O)N)(C)C4(C4=[N+])1C(C(CCC(=O)NCC(OP(OC1C(O)C(OC1C O)n1c6c(nc1)cc(OC)cc6)(=O)[O-])C)(C)C4CC(=O)N)=C(C1=[N+])2C(=CC2=[N+])3C(C(CCC(=O)N)(C)C2CCC(=O)N)=C5C)C(C)(C)C1CC C(=O)N)C)C</chem> |
| 510 | <chem>C1CC(=O)C</chem>                                                                                                                                                                                                       |
| 511 | <chem>S1CC2NC(=O)NC2C1CCCC(=O)[O-]</chem>                                                                                                                                                                                    |
| 512 | <chem>O1C(CO)C(O)C(O)C(OC2OC(CO)C(O)C(O)C2O)C1 Oc1ccc(cc1)C([NH3+])C(=O)[O-]</chem>                                                                                                                                          |
| 513 | <chem>O=C([O-])C(N)=C</chem>                                                                                                                                                                                                 |
| 514 | <chem>OC1CC2C(C3CCC(C(CCC(=O)NCC(=O)[O-])C)C13C)C(O)CC1CC(O)CCC12C</chem>                                                                                                                                                    |
| 515 | <chem>O=C1NC(=NC=2NCC(NC1=2)C(O)C(O)C)N</chem>                                                                                                                                                                               |
| 516 | <chem>S1SCC(O)C(O)C1</chem>                                                                                                                                                                                                  |
| 517 | <chem>O=C(N)c1cccnc1</chem>                                                                                                                                                                                                  |
| 518 | <chem>s1c(ccc1/C(=N/C(=O)C(CCc1cccc1)CS)/C(=O)[O-])Cn1nnnc1</chem>                                                                                                                                                           |
| 519 | <chem>P(OC1C(O)C(OC1CO)N1C=CC(=O)NC1=O)(=O)([O-])[O-]</chem>                                                                                                                                                                 |
| 520 | <chem>O1C(C(=O)N)C(O)C(O)C(O)C1CO</chem>                                                                                                                                                                                     |
| 521 | <chem>O1C(C(=O)[O-])C(OC)C(O)C(O)C1O</chem>                                                                                                                                                                                  |
| 522 | <chem>P(OCC(=O)[O-])(=O)([O-])[O-]</chem>                                                                                                                                                                                    |
| 523 | <chem>ONC(=[NH2+])NCCCC</chem>                                                                                                                                                                                               |
| 524 | <chem>O1C(O)C(O)C(O)C=C1C(=O)[O-]</chem>                                                                                                                                                                                     |
| 525 | <chem>P(OCC(=O)NO)(=O)([O-])[O-]</chem>                                                                                                                                                                                      |
| 526 | <chem>s1c2c(nccc2)cc1S(=O)(=O)NC1CCN(Cc2cc(ccc2O)C(=[NH2+])N)C1=O</chem>                                                                                                                                                     |
| 527 | <chem>O1C(CO)C(O)C(O)C1N1C=CC(=O)NC1=O</chem>                                                                                                                                                                                |
| 528 | <chem>P(Oc1c2nc(ccc2ccc1)C#N)(=O)([O-])[O-]</chem>                                                                                                                                                                           |
| 529 | <chem>OC(Cn1c2nenc(N)c2nc1)C</chem>                                                                                                                                                                                          |
| 530 | <chem>O(Cc1cccc1)C(=O)NC(Cc1cccc1)C(=O)C[N+]#N</chem>                                                                                                                                                                        |
| 531 | <chem>OC(CCCCCCCCCC)CC(=O)[O-]</chem>                                                                                                                                                                                        |
| 532 | <chem>C(CCCCCC)CCCC</chem>                                                                                                                                                                                                   |
| 533 | <chem>OCCCCO</chem>                                                                                                                                                                                                          |
| 534 | <chem>BrCC(=O)NCCC(=O)NC(C(=O)NCCc1ccc(NC(=O)C(=O)[O-])cc1)CO</chem>                                                                                                                                                         |
| 535 | <chem>Clc1nc(nc1N1CCN(CC1)C)C(=O)N1CC(N(CC1)CC(O)CC(Cc1cccc1)C(=O)NC1C(CCC1O)C)C(=O)NC(C)(C)C</chem>                                                                                                                         |
| 536 | <chem>O(C(C(=O)[O-])=C)C1=CC=CC(C(=O)[O-])C1O</chem>                                                                                                                                                                         |
| 537 | <chem>P(OCC1OC(NC(=O)C[NH2+])CC(O)(Cc2cc3c(nc(nc3 O)n)cc2)c2ccc(cc2)C(=O)NC(CCC(=O)[O-])C(=O)[O-])C(O)C1O)(=O)([O-])[O-]</chem>                                                                                              |
| 538 | <chem>O=C1N=C(NC=2N=CC(N(C1=2)CO)CNc1ccc(cc1)C(=O)NC(CCC(=O)[O-])C(=O)[O-])N</chem>                                                                                                                                          |
| 539 | <chem>O1C(CO)C(O)C(O)C(O)C1Oc1cc(cc([N+])(=O)[O-])c1)C(=O)N</chem>                                                                                                                                                           |
| 540 | <chem>O(C)c1cc(ccc1O)CN1C(Cc2ccccc2)C(O)CN(N(Cc2c c(OC)c(O)cc2)C1=O)Cc1cccc1</chem>                                                                                                                                          |
| 541 | <chem>O(CCO)C</chem>                                                                                                                                                                                                         |
| 542 | <chem>OC(C(O)CO)CC(O)C(=O)[O-]</chem>                                                                                                                                                                                        |
| 543 | <chem>Brcl(OC(CCC(=O)[O-])C(=O)[O-</chem>                                                                                                                                                                                    |

|     |                                                                                                                                                                               |
|-----|-------------------------------------------------------------------------------------------------------------------------------------------------------------------------------|
|     | <chem>]cc(cc1OC)Cc1cnc(nc1N)N</chem>                                                                                                                                          |
| 544 | <chem>s1c2c(nc1C(=O)C(NC(=O)C1N(CC(O)C1)C(=O)C)C CCNC(=[NH2+])N)cccc2</chem>                                                                                                  |
| 545 | <chem>S1C=C(NC=C(C=O)C1c1nnn(c1)C)C(=O)[O-]</chem>                                                                                                                            |
| 546 | <chem>[PH](=O)([O-])C</chem>                                                                                                                                                  |
| 547 | <chem>O=C([O-])c1cc(NC(=O)C[NH3+])c(NC(=O)C)cc1</chem>                                                                                                                        |
| 548 | <chem>P(O)(=O)([O-])[O-]</chem>                                                                                                                                               |
| 549 | <chem>[Fe]123[NH+]4C5=Cc6n1c(C=C1N2C(=CC=2N3C(= CC4=C(CCC(=O)[O-])C5(CC(=O)[O-])C)C(CC(=O)[O-])C)C=2CCC(=O)[O-])C(CC(=O)[O-])=C1CCC(=O)[O-])c(CCC(=O)[O-])c6CC(=O)[O-]</chem> |
| 550 | <chem>P(OP(OCC1OC(n2c3N=C(NC(=O)c3nc2)N)C2OP(O C12)(=O)[O-])(=O)[O-])(=O)([O-])[O-]</chem>                                                                                    |
| 551 | <chem>S(OC1C(O)C(O)C(OC1CO)O)(=O)(=O)[O-]</chem>                                                                                                                              |
| 552 | <chem>Oc1cc(O)ccc1C(=O)[O-]</chem>                                                                                                                                            |
| 553 | <chem>O1c2cc(ccc2OC1)-c1c(n[nH]c1C(=O)[O-])- c1cc(CC)c(O)cc1O</chem>                                                                                                          |
| 554 | <chem>O=C(NCCC[NH+])(C)C)c1c2[nH+ ]c3c(cccc3)c(N)c2cc1</chem>                                                                                                                 |
| 555 | <chem>OC(C(O)C)(C[NH3+])C</chem>                                                                                                                                              |
| 556 | <chem>P(OC1C(O)C([NH3+])C(OC1CO)O)(=O)([O-])[O-]</chem>                                                                                                                       |
| 557 | <chem>P(OC1OC(CO)C(O)C(O)C1O)(=O)([O-])[O-]</chem>                                                                                                                            |
| 558 | <chem>C1CCN1C(=O)C2(OC1=O)CC1(C3[NH+](CCC34C2 N(c2cc(OC)c(cc24)C2(CC3CC(O)(C[NH+](C3)CCc3 c2[nH]c2c3cccc2)CC)C(OC)=O)C)CC=C1)CC</chem>                                        |
| 559 | <chem>P(OCC1OC(N2C=CC(=NC2=O)N)CC1)(=O)([O-])[O-]</chem>                                                                                                                      |
| 560 | <chem>OC1C(O)C(N(Cc2cc(N)ccc2)C(O)N(Cc2cc(N)ccc2)C 1Cc1cccc1)Cc1cccc1</chem>                                                                                                  |
| 561 | <chem>O1C(C)C(NC2C=C(CO)C(O)C(O)C2O)C(O)C(O)C1 OC1C(O)C(O)C(OC1CO)O</chem>                                                                                                    |
| 562 | <chem>S(CCC([NH3+])C(=O)[O-])C</chem>                                                                                                                                         |
| 563 | <chem>S(OCC12OC(OC1C1OS(OC1CO2)(=O)=O)(C)C)(= O)(=O)N</chem>                                                                                                                  |
| 564 | <chem>S(C)c1ncnc2n(cnc12)C1OC(CO)C(O)C1O</chem>                                                                                                                               |
| 565 | <chem>O=C1CC(CC(O)O)C(C)(C)C1C</chem>                                                                                                                                         |
| 566 | <chem>s1c(-c2nc(ncc2)Nc2ccc(cc2)C(F)(F)F)c(nc1C)C</chem>                                                                                                                      |
| 567 | <chem>S(OCC1OC(n2c3nenc(N)c3nc2)C(O)C1O)(=O)(=O) N</chem>                                                                                                                     |
| 568 | <chem>FC(F)(F)C([O-])([O-])C(F)(F)F</chem>                                                                                                                                    |
| 569 | <chem>[Fe]123[NH+]4C5=Cc6n1c(C=C1N2C(=CC=2N3C(= CC4=C(C)C5C=C)C(C(O)=C)C=2C)C(C)=C1CCC(= O)[O-])c(CCC(=O)[O-])c6C</chem>                                                      |
| 570 | <chem>O=C([O-])C([NH3+])C)C</chem>                                                                                                                                            |
| 571 | <chem>OC(C(O)C(O)C(O)C)C=O</chem>                                                                                                                                             |
| 572 | <chem>[nH]1c2c(nc1)cccc2</chem>                                                                                                                                               |
| 573 | <chem>S(=O)(=O)([O-])NP(=O)(NCCCC([NH3+])C(=O)[O-])N</chem>                                                                                                                   |
| 574 | <chem>O(CCC([NH3+])C(=O)[O-])CC[NH3+]</chem>                                                                                                                                  |
| 575 | <chem>S(\C(=[NH+])CCCCCCCCCCCC\NH+)=C(\SC)/ N)\N)C</chem>                                                                                                                     |
| 576 | <chem>P(OCc1enc(C)c(O)c1C[NH2+])C(CCCC)C(=O)[O- ](=O)([O-])[O-]</chem>                                                                                                        |
| 577 | <chem>[Hg]c1ccc(S(=O)(=O)[O-])cc1</chem>                                                                                                                                      |
| 578 | <chem>S(C)c1cc(Nc2nnc3c2cc(OC)c(OC)c3)cccc1</chem>                                                                                                                            |
| 579 | <chem>[NH3+ ]C1CCCCC1</chem>                                                                                                                                                  |
| 580 | <chem>OC1(CCC2C3C(=C4C(=CC(=O)CC4)CC3)C=CC12 C)C</chem>                                                                                                                       |
| 581 | <chem>S(=O)(=O)([O-])CC(NC(=O)CCC([NH3+])C(=O)[O-</chem>                                                                                                                      |

|     |                                                                                                                                                               |
|-----|---------------------------------------------------------------------------------------------------------------------------------------------------------------|
|     | ]C(=O)NCC(=O)[O-]                                                                                                                                             |
| 582 | [nH+]1c2c(CCCC)c(NCCn2nccc2CCCC[n+])2c3cc(N)ccc3c3c(cc(N)cc3)c2-c2cccc2)c2c1cccc2                                                                             |
| 583 | Clc1se(Cl)cc1-c1nc(ncc1)N                                                                                                                                     |
| 584 | P(OCCCN1C2=C(NC(=O)NC2=O)N(CC(O)C(O)C(O)CO)C1=O)(=O)([O-])[O-]                                                                                                |
| 585 | OC(CCCCC)C=C                                                                                                                                                  |
| 586 | Oc1nc[nH]c2-c1nnc2                                                                                                                                            |
| 587 | S(=O)(=O)(N)c1ccc(cc1)C(=O)NCc1cc(F)ccc1F                                                                                                                     |
| 588 | O=C([O-])CN(CC(=O)[O-])CC(=O)[O-]                                                                                                                             |
| 589 | P(OCC(O)C(O)C(O)C(=O)[O-])(=O)([O-])[O-]                                                                                                                      |
| 590 | O1CCN(CC1)CCOc1c2c(cccc2)c(NC(=O)Nc2n(nc(c2)C(C)(C)C)-c2ccc(cc2)C)cc1                                                                                         |
| 591 | S(=O)(=O)(n1ncc(c1)-c1c2cc(ccc2ccc1OC)C(=[NH2+])N)C                                                                                                           |
| 592 | O1CCCC1C(=O)[O-]                                                                                                                                              |
| 593 | P(=O)([O-])([O-])C1([NH3+])CC1                                                                                                                                |
| 594 | O=C[CH-]C=O                                                                                                                                                   |
| 595 | O(c1ccc(NC(=O)c2cc([N+](=O)[O-])ccc2)cc1NC(=O)c1cc([N+](=O)[O-])ccc1)c1cc(C(=O)[O-])c(cc1)C(=O)[O-]                                                           |
| 596 | Fe1ccc(cc1)C=1CC[NH+](CC=1)CCCC=1NC(=O)c2c(N=1)c(ccc2)C                                                                                                       |
| 597 | S(=O)(=O)(NC(CC(=O)[O-])C(=O)NC(Cc1ccc(cc1)C(=[NH2+])N)C(=O)N1CCCCC1)c1c(C)c(C)c(OC)cc1C                                                                      |
| 598 | s1ccnc1C(CC)C                                                                                                                                                 |
| 599 | O=C([O-])C([NH3+])CC(=O)[O-]                                                                                                                                  |
| 600 | Fe1[nH]c(N)c-2nc(nc-2n1)Cc1cc(OC)ccc1OC                                                                                                                       |
| 601 | [N+](C)(C)(C)C                                                                                                                                                |
| 602 | P(OC1OC(CO)C(O)C1O)(=O)([O-])[O-]                                                                                                                             |
| 603 | OCCCC([NH3+])C(=O)[O-]                                                                                                                                        |
| 604 | OC1C(O)C(O)C(O)C(O)C1O                                                                                                                                        |
| 605 | P(Oc1cccc1C=O)(OCC1CCCC1)(=O)[O-]                                                                                                                             |
| 606 | O1[N-]C(=O)C([NH3+])C1                                                                                                                                        |
| 607 | O1CCOB1OCCCN(=[NH2+])N                                                                                                                                        |
| 608 | s1c2c(nc1SCCCS(=O)(=O)[O-])cccc2                                                                                                                              |
| 609 | O1C(C(O)C(O)C(O)C1CO)c1[nH]c2cc(ccc2n1)C                                                                                                                      |
| 610 | O=C([O-])C([NH3+])CCCC(=O)[O-]                                                                                                                                |
| 611 | P(O)(=O)([O-])CCN(O)C=O                                                                                                                                       |
| 612 | Ic1c2cc(sc2ccc1)C(=[NH2+])N                                                                                                                                   |
| 613 | OB(O)c1ccc(cc1)C(=O)[O-]                                                                                                                                      |
| 614 | P(OCC1OC(n2c3nnc(N)c3nc2)C(O)C1O)(=O)([O-])CP(O)(=O)[O-]                                                                                                      |
| 615 | [Cu]123[Cu]45[Cu]1[S+2]24[Cu]35                                                                                                                               |
| 616 | O1C(C(=O)[O-])C(O)C(O)C(O)C1O                                                                                                                                 |
| 617 | Oc1c(cccc1-c1[nH]c2c(c1)cc(cc2)C(=[NH2+])N)-c1cccc1                                                                                                           |
| 618 | O1C(CO)C(O)C(O)C1n1c2ncnc(N)c2cc1                                                                                                                             |
| 619 | S(CCNC(=O)CCNC(=O)[C@]1(O)[C@H](OP(OP(O)C[C@H]2O[C@@H](n3c4ncnc(N)c4nc3)[C@@H](O)[C@@H]2OP(=O)([O-])[O-])(=O)[O-])(=O)[O-])C1(C)C)C(=O)C=Cc1cc(OC)c(O)c(OC)c1 |
| 620 | S(CCC(SSCCO)CCCC(=O)[O-])C[NH3+]                                                                                                                              |
| 621 | O1C(OC2OC(CO)C(O)C(O)C2O)(CO)C(O)C(O)C1COC(=O)CCCCC                                                                                                           |
| 622 | O=C1NC(=Nc2ncc(nc12)CO)N                                                                                                                                      |
| 623 | P(OCC1OC(n2c3c(nc2)ncnc3)C(O)C1O)(=O)([O-])[O-]                                                                                                               |
| 624 | SCC([NH3+])C(=O)[O-]                                                                                                                                          |

|     |                                                                                                                            |
|-----|----------------------------------------------------------------------------------------------------------------------------|
| 625 | O1C(COC(=O)c2cc(O)c(O)c(O)c2)C(OC(=O)c2cc(O)c(O)c(O)c2)C(OC(=O)c2cc(O)c(O)c(O)c2)C1OC(=O)c1cc(O)c(O)c(O)c1                 |
| 626 | O1C(C)C(OC2OC(C)C(OC3OC(C)C(=O)CC3)C(O)C2)C([NH+](C)C)CC1OC1CC(O)(CC)C(O)c2c1c(O)c1c(c2)C(=O)c2c(C1=O)c(O)ccc2             |
| 627 | O=C(CC(C)C)C(=O)[O-]                                                                                                       |
| 628 | OC(C(O)C(=O)[O-])CC(=O)C(=O)[O-]                                                                                           |
| 629 | O=C([O-])C(n1nnc(c1)C[NH3+])CC(C)C                                                                                         |
| 630 | [nH]1cnc1-c1cccc1                                                                                                          |
| 631 | Oc1cccc1                                                                                                                   |
| 632 | O=C(Nc1cc(Nc2nc(ccn2)-c2ccnc2)c(cc1)C)c1ccc(cc1)CN1CC[NH+](CC1)C                                                           |
| 633 | s1c2S(=O)(=O)N(C(=Cc2cc1S(=O)(=O)N)CN1CCOCC1)c1cc(O)ccc1                                                                   |
| 634 | O1C(CO)C(=O)C(O)C1n1c2nnc(N)c2nc1                                                                                          |
| 635 | OC(C(O)CO)CO                                                                                                               |
| 636 | P(OCC1OC(n2c3nnc(N)c3nc2)C(O)C1O)(OP(OP(O)P(OP(OCC1OC(N2C=C(C)C(=O)NC2=O)CC1O)(=O)[O-])(=O)[O-])(=O)[O-])(=O)[O-])(=O)[O-] |
| 637 | O1CC(O)C(O)C=C1C(=O)[O-]                                                                                                   |
| 638 | Oc1cc(O)ccc1C(=O)C=Cc1ccc(O)cc1                                                                                            |
| 639 | P(OCc1cnc(C)c(O)c1C[NH2+])C(\C=C\OCC[NH3+])C(=O)[O-](=O)([O-])[O-]                                                         |
| 640 | SCC(NC(=O)CCC([NH3+])C(=O)[O-])C(=O)NCC(=O)NCCC[NH2+][CCCC[NH3+]                                                           |
| 641 | S(=O)(=O)([O-])CC[NH2+])C1CCCCC1                                                                                           |
| 642 | S(SCC(NC(=O)CCC([NH3+])C(=O)[O-])C(=O)NCC(=O)[O-])CC(NC(=O)CCC([NH3+])C(=O)[O-])C(=O)NCC(=O)[O-]                           |
| 643 | Br1cc(cc(Br)c1[O-])C(=O)c1c2c(oc1CC)cc(S(=O)(=O)Nc1ccc(S(=O)([O-])=Nc3scn3)cc1)cc2                                         |
| 644 | o1nc(O)c(CC([NH3+])C(=O)[O-])c1C(C)(C)C                                                                                    |
| 645 | O1CC2N(C3=C(N=C(NC3=O)N)NC2)C1=O                                                                                           |
| 646 | O1C(CO)C(O)C(O)C(O)C1OCCCCC                                                                                                |
| 647 | O=C([O-])c1cc(NC(N)N)c(NC(=O)C)cc1                                                                                         |
| 648 | P(OC1C(OP(=O)([O-])[O-])C(OP(=O)([O-])[O-])C(O)C(OP(=O)([O-])[O-])C1OP(=O)([O-])[O-])(=O)([O-])[O-]                        |
| 649 | Br1nc2c(ncnc2N)n1C1OC(COP(=O)([O-])[O-])C(O)C1O                                                                            |
| 650 | [As](SCC([NH3+])C(=O)[O-])(=O)([O-])[O-]                                                                                   |
| 651 | O=C([O-])C1N(CCC1)C(=O)C                                                                                                   |
| 652 | SCCC(=O)N1CCc2c([nH]c3c2cccc3)C1                                                                                           |
| 653 | S(OCC1OC(n2c3nnc(N)c3nc2)C(O)C1O)(=O)([O-])=NC(=O)C(N)C                                                                    |
| 654 | Oc1ccc(cc1)C[C@H]([NH3+])C(=O)N                                                                                            |
| 655 | O=C(N(O)C(C)C)C(=O)[O-]                                                                                                    |
| 656 | OC1CCC(NC(=O)C(OC)C(O)C(O)C(O)C=C\C(C)(C)C)C(=O)NC1                                                                        |
| 657 | P(OC1OC(CO)C(O)C(O)C1NC(=O)C)(OP(OCC1OC(N2C=CC(=O)NC2=O)C(O)C1O)(=O)[O-])(=O)[O-]                                          |
| 658 | [N+](CC)#C                                                                                                                 |
| 659 | O=C([O-])CCc1ccc(cc1)C                                                                                                     |
| 660 | O=C1CN(CC1NC(=O)C(NC(OCc1cccc1)=O)CC(C)C)C(=O)C(NC(OCc1cccc1)=O)CC(C)C                                                     |
| 661 | SCC(NC(=O)CCC([NH3+])C(=O)[O-])C(=O)[O-]                                                                                   |
| 662 | OC1C([NH2+])CC1O)CO                                                                                                        |

|     |                                                                                                                                     |
|-----|-------------------------------------------------------------------------------------------------------------------------------------|
| 663 | s1c[n+](Cc2nc(nc2N)C)c(C)c1CCOP(=O)([O-])[O-]                                                                                       |
| 664 | O1C(C(O)C(O)CO)C(NC(=O)C)C(NC(=[NH2+])N)C<br>C1C(=O)[O-]                                                                            |
| 665 | OC(C([NH3+])Cc1cccc1)C(=O)NC(CC(C)C)C(=O)[<br>O-]                                                                                   |
| 666 | O=C([O-])C(CC([NH3+])C(=O)[O-])C                                                                                                    |
| 667 | P(OCc1nc(C)c(O)c1C[NH2+])CC(OP(=O)([O-])[O-]<br>)C(=O)([O-])[O-]                                                                    |
| 668 | O1C(C)C([NH3+])C(O)C(O)C1O                                                                                                          |
| 669 | S(=O)([O-])C(C(NC=C\C=O)C(=O)[O-]<br>)(Cn1nnc1)C                                                                                    |
| 670 | P(OC1CC(OC1CO)N1C=CC(=O)NC1=O)(=O)([O-]<br>)[O-]                                                                                    |
| 671 | S1CC(CC(OC)=O)=C(NC1C(NC(=O)Cc1sccc1)C=O<br>)C(=O)[O-]                                                                              |
| 672 | O1[C@H](CN(CC[C@H]([NH3+])C(=O)[O-]<br>)C)[C@@H](O)[C@@H](O)[C@H]1n1c2nnc(N)<br>c2nc1                                               |
| 673 | O=C1NC(=O)NC=C1C                                                                                                                    |
| 674 | O1c2c(C(=O)CC1c1ccc(O)cc1)c(O)cc(O)c2                                                                                               |
| 675 | O=C(NC(CCc1cccc1)CCC(=O)[O-]<br>)CCCCCc1cccc1                                                                                       |
| 676 | O=C(NC)CCC([NH3+])C(=O)[O-]                                                                                                         |
| 677 | S(=O)(=O)([O-]<br>)c1cc2c(c(O)c1N=N\c1cccc1S(=O)(=O)[O-]<br>)c(Nc1nc(nc(n1)N)N)cc(S(=O)(=O)[O-])c2                                  |
| 678 | Brcc1ccc(cc1)-c1n(nc(c1)C(F)(F)F)-<br>c1ccc(S(=O)(=O)N)cc1                                                                          |
| 679 | O1C2([N-]C(=O)N(C)C2=O)C(O)C(O)C(O)C1CO                                                                                             |
| 680 | P(=O)([O-])([O-]<br>)C(F)(F)c1ccc(cc1)CC(NC(=O)C(NC(=O)c1cccc1)<br>CCC(=O)[O-])C(=O)NC(Cc1ccc(cc1)C(P(=O)([O-]<br>)[O-])(F)F)C(=O)N |
| 681 | P(OCC(O)CO)(OCC[NH3+])(=O)[O-]                                                                                                      |
| 682 | P(OC1OC(CO)C(O)C(O)C1F)(OP(OCC1OC(N2C=C<br>C(=O)NC2=O)C(O)C1O)(=O)[O-])(=O)[O-]                                                     |
| 683 | Fc1cc2nc([nH]c2cc1C(=[NH2+])N)-<br>c1cccc(OCC(C)C)c1O                                                                               |
| 684 | SCP(O)(=O)[O-]                                                                                                                      |
| 685 | [nH]1c2c(ncnc2N)cc1                                                                                                                 |
| 686 | [se]1c2c([nH]cc2CC([NH3+])C(=O)[O-])cc1                                                                                             |
| 687 | O=C1NC(=O)NC=C1C#C                                                                                                                  |
| 688 | P(Oc1c2NCCCc2ccc1)(=O)([O-])[O-]                                                                                                    |
| 689 | P(OCC1OC(n2c3nnc(N)c3nc2)C(O)C1O)(OP(OCC1<br>OC([n+]2cc(ccc2)C(=O)N)C(O)C1O)(=O)[O-]<br>)(=O)[O-]                                   |
| 690 | O(Cc1cccc1)C(=O)NC(CCCNC(N)N)C(=O)NC(C(=O)<br>C)C                                                                                   |
| 691 | O=C1C2CC(C1)CC2                                                                                                                     |
| 692 | P(OC1C(O)C(O)C(O)C(O)C1O)(=O)([O-])[O-]                                                                                             |
| 693 | P(OCC(O)C(O)C(O)CNc1cccc1C(=O)[O-])(=O)([O-]<br>)[O-]                                                                               |
| 694 | S1C2N(C(C(=O)[O-]<br>)C1(C)C)C(=O)C2NC(=O)CCCC([NH3+])C(=O)[O-]<br>]                                                                |
| 695 | O(CCOCCOCCOCCOCC)CCOCCOCCOCCO                                                                                                       |
| 696 | C1CCCCC1                                                                                                                            |
| 697 | [NH2+](CCCC[NH3+])CCC[NH3+]                                                                                                         |
| 698 | Clc1cc(cc(Cl)c1)CNC(=O)c1cc(-<br>n2nc3c(nc(nc3O)N)n2)ccc1                                                                           |

|     |                                                                                                                                                                                                                                                                         |
|-----|-------------------------------------------------------------------------------------------------------------------------------------------------------------------------------------------------------------------------------------------------------------------------|
| 699 | OCC(n1cc(nc1)C(=O)N)CCc1c2c(ccc1)cccc2                                                                                                                                                                                                                                  |
| 700 | P(=O)([O-])([O-])C([NH2+])Cc1cccc1)c1cccc1                                                                                                                                                                                                                              |
| 701 | Oc1ccc(N2N(C(=O)[C-](CCCC)C2=O)c2cccc2)cc1                                                                                                                                                                                                                              |
| 702 | O=C([O-])C([NH3+])CCCC([NH3+])C(=O)[O-]                                                                                                                                                                                                                                 |
| 703 | P(=O)([O-])([O-]<br>)C(F)(F)c1ccc(cc1)CC(NC(=O)C)C(=O)NC1CCCC<br>N(Cc2ccc(cc2)-c2cccc2)C1=O                                                                                                                                                                             |
| 704 | Ic1cc(cc(I)c1O)c1cc(I)c(O)cc1)CC(=O)[O-]                                                                                                                                                                                                                                |
| 705 | O=C1CCC2C3C(CCC12C)C1(C(CC(=O)CC1)CC3)C                                                                                                                                                                                                                                 |
| 706 | O1C(/C(=C/C2CC(OC)C(Oc3cc4c(nc4)C)cc3)CC2)<br>/C)C(C)C(O)CC(=O)C(\C=C(\C)/C(O)C(CC(OC)C2<br>OC(O)C(=O)C(=O)N3C(CCCC3)C1=O)C(CC2OC)<br>C)C)CC                                                                                                                            |
| 707 | Oc1ccc(cc1)-c1cc2c3c(ccc2nc1)ccnc3                                                                                                                                                                                                                                      |
| 708 | P(=O)([O-])([O-])C(=O)Nc1ccc(cc1)CC                                                                                                                                                                                                                                     |
| 709 | P(OCc1c[n+](O)c(C)c(O)c1C=O)(=O)([O-])[O-]                                                                                                                                                                                                                              |
| 710 | Ic1cccc1CS                                                                                                                                                                                                                                                              |
| 711 | P(O)(=O)([O-])CC(=O)NO                                                                                                                                                                                                                                                  |
| 712 | O=C(NC(CCCC[NH3+])C(=O)Nc1cccc1)C(CCCC)<br>CNNCC(CCCC)C(=O)NC(CCCC[NH3+])C(=O)Nc1<br>cccc1                                                                                                                                                                              |
| 713 | S1C(C)C(C)NC1C(NC(=O)C([NH3+])c1ccc(O)cc1)<br>C=O)C(=O)[O-]                                                                                                                                                                                                             |
| 714 | S(=O)(=O)([O-])CC([NH3+])C(=O)[O-]                                                                                                                                                                                                                                      |
| 715 | O(CC(=O)C(C)C)c1nc(nc2nc[nH]c12)N                                                                                                                                                                                                                                       |
| 716 | S(OC1C(OC2OC(C(=O)[O-]<br>)C(OC3OC(COS(=O)(=O)[O-]<br>)C(OC)C(OC)C3OS(=O)(=O)[O-]<br>)C(OC)C2OC)C(OC(OC2C(OC)C(OS(=O)(=O)[O-]<br>)C(OC2C(=O)[O-])OC2C(OS(=O)(=O)[O-]<br>)C(OS(=O)(=O)[O-])C(OC2COS(=O)(=O)[O-]<br>)OC)C1OS(=O)(=O)[O-])COS(=O)(=O)[O-]<br>)(=O)(=O)[O-] |
| 717 | P(OCC1OC(N2C(=O)[CH-<br>]C(=O)NC2=O)C(O)C1O)(=O)([O-])[O-]                                                                                                                                                                                                              |
| 718 | O1C(=O)C=C(C2CCC3(O)C4C(CC(O)C23C)C2(C(C<br>C(O)CC2)CC4)C)[CH-]1                                                                                                                                                                                                        |
| 719 | [Hg+]C                                                                                                                                                                                                                                                                  |
| 720 | O=C(NC1CCCCC1)NCCCCCCCCC                                                                                                                                                                                                                                                |
| 721 | S(Cc1ccc([N+](=O)[O-]<br>)cc1)CC(NC(=O)CCC([NH3+])C(=O)[O-]<br>)C(=O)NCC(=O)[O-]                                                                                                                                                                                        |
| 722 | OCCC(=O)[O-]                                                                                                                                                                                                                                                            |
| 723 | S(OCC([NH3+])C(=O)[O-]<br>)(=O)(=O)CCCCCCCCCCCCCCCC                                                                                                                                                                                                                     |
| 724 | S=C(Nc1cccc1)N                                                                                                                                                                                                                                                          |
| 725 | O(C)c1ccc(OC)cc1Cc1nc2nc(nc(N)c2c1C)N                                                                                                                                                                                                                                   |
| 726 | O=C1NC(=NC(NC)=C1[N+](=O)[O-])N                                                                                                                                                                                                                                         |
| 727 | OCC[NH+](CC(=O)[O-])CCO                                                                                                                                                                                                                                                 |
| 728 | C(CCCCCC)CCCCCCC                                                                                                                                                                                                                                                        |
| 729 | O1CC(O)C(O)C(O)C1OC1CCNC(=O)C1O                                                                                                                                                                                                                                         |
| 730 | O=C([O-])/C(/N)=C/C                                                                                                                                                                                                                                                     |
| 731 | P(OC1OC(C)C(O)C(O)C1O)(OP(OCC1OC(N2C=C(<br>C)C(=O)NC2=O)CC1O)(=O)[O-])(=O)[O-]                                                                                                                                                                                          |
| 732 | Clc1ccc(cc1)C(=O)[O-]                                                                                                                                                                                                                                                   |
| 733 | S1C2OC(CO)C(O)C(O)C2N=C1C                                                                                                                                                                                                                                               |
| 734 | OCC([NH3+])(CO)CO                                                                                                                                                                                                                                                       |
| 735 | SC(CCCCC(=O)[O-])CCS                                                                                                                                                                                                                                                    |
| 736 | O(C)c1cc(OO)ccc1O                                                                                                                                                                                                                                                       |
| 737 | O1C(CO)C(O)CC(O)C1OCCCCC                                                                                                                                                                                                                                                |



|     |                                                                                                                                          |
|-----|------------------------------------------------------------------------------------------------------------------------------------------|
| 738 | <chem>O=C([O-])C([NH3+])CCC=O</chem>                                                                                                     |
| 739 | <chem>Clc1ccc(Cl)ccc1Oc1ccc(OC(C(=O)[O-])C)cc1</chem>                                                                                    |
| 740 | <chem>O=C(N)CCCCCCC\C=C\CCCCCCCC</chem>                                                                                                  |
| 741 | <chem>n1ccn(C)c1C</chem>                                                                                                                 |
| 742 | <chem>S(CCC([NH3+])C(=O)[O-])C(F)(F)F</chem>                                                                                             |
| 743 | <chem>O=C([O-])C([NH3+])CCCCNC(=O)[O-]</chem>                                                                                            |
| 744 | <chem>FC(F)(F)c1ccc(NC(=O)C(C(O)C)C#N)cc1</chem>                                                                                         |
| 745 | <chem>O(CCCCCCOc1ccc(cc1)C(=[NH2+])N)c1ccc(cc1)C(=[NH2+])N</chem>                                                                        |
| 746 | <chem>O=CC(N)Cc1[nH]cnc1</chem>                                                                                                          |
| 747 | <chem>P(OCCCN1C2=C(NC(=O)NC2=O)N(CC(O)C(O)C(O)CO)C1=O)(=O)([O-])[O-]</chem>                                                              |
| 748 | <chem>P(OC(O)C(N)C(=O)[O-])(=O)([O-])[O-]</chem>                                                                                         |
| 749 | <chem>P(OCC[N+](C)(C)C(=O)([O-])CCC(OC(=O)CCCC)COC(=O)CCCC</chem>                                                                        |
| 750 | <chem>o1c(nnc1C(C)(C)C)C(=O)C1[NH2+]CCCC1</chem>                                                                                         |
| 751 | <chem>O=C([O-])CCCCCCCC</chem>                                                                                                           |
| 752 | <chem>[Cu+2](O)(O)(n1ccnc1)(n1ccnc1)(n1ccnc1)n1ccnc1</chem>                                                                              |
| 753 | <chem>O=C</chem>                                                                                                                         |
| 754 | <chem>O(c1ccc(cc1OC)C1(CCC(CC1)C(=O)[O-])C#N)C1CCCC1</chem>                                                                              |
| 755 | <chem>O1C(CC(OC)C(CCC(=O)C(C(OC)C\C=C\N(CO)C)C)C(CC\C=C/c2occ(n2)-c2occ(n2)-c2occ(n2)C(OC)C(C)C(=O)CC(O)CC(O)CC1=O)C</chem>              |
| 756 | <chem>SC1OC(CO)C(O)C(O)C1O</chem>                                                                                                        |
| 757 | <chem>OC1CCC2C3C(CCC12C)c1c(CC3CCCCCCCCCCC(=O)N(CCCC)C)cc(O)cc1</chem>                                                                   |
| 758 | <chem>SCC(O)CO</chem>                                                                                                                    |
| 759 | <chem>Clc1cc2[nH]c(cc2cc1C(=[NH2+])N)-c1cccc(-c2cccc2)c1O</chem>                                                                         |
| 760 | <chem>O1C(CO)C(O)C(O)C1OC1C(O)C(OCC1O)O</chem>                                                                                           |
| 761 | <chem>O1C(C)C(O)CCC1O</chem>                                                                                                             |
| 762 | <chem>[Ru+2]123(N4C(C=C(C=C4)CCCCCCCC(=O)NC4C5CC6CC4CC(C5)C6)=C4N1C=CC(=C4)C)(N1C(=C4N2C=CC=C4)C=CC=C1)N1C(=C2N3C=CC=C2)C=CC=C1</chem>   |
| 763 | <chem>s1c2ncccc2cc1C(=[NH2+])N</chem>                                                                                                    |
| 764 | <chem>s1cccc1SCC(C(CC(C)C)C(=O)NC(Cc1cccc1)C(=O)NC)C(=O)NO</chem>                                                                        |
| 765 | <chem>OC1CCC2C3C(CCC12C)C1(C(CC(O)CC1)CC3)C</chem>                                                                                       |
| 766 | <chem>O=C(Cc1cccc1)C(=O)[O-]</chem>                                                                                                      |
| 767 | <chem>P(OCC1OC(n2c3e(nc2)nenc3N)C(O)C1O)(=O)([O-])[O-]</chem>                                                                            |
| 768 | <chem>O=C([O-])C([NH3+])CCCN\C(=[NH+])CC=C)\N</chem>                                                                                     |
| 769 | <chem>Oc1ccc(cc1)CCC(=O)[O-]</chem>                                                                                                      |
| 770 | <chem>O=C([O-])C(=O)[O-]</chem>                                                                                                          |
| 771 | <chem>O=C1NC(=NC=2NCC(NC1=2)C(O)C(O)C)N</chem>                                                                                           |
| 772 | <chem>Oc1ccc(NC(=O)\C=C(\C=C\C=C(\C=C\C=C=2C(CCCC=2C)(C)C)/C)/C)cc1</chem>                                                               |
| 773 | <chem>OC1CCC2C3C(CCC12C)C1(C(CC(O)CC1)CC3)C</chem>                                                                                       |
| 774 | <chem>Clc1c2OC3c4c(C5=CC=CC35OC3OC(C)(C)C([NH+](C)C)C(O)C3O)cc(cc4)C(OC(=O)c3ccc(OC)cc4OC(=C)C(=O)Nc34)COC(=O)CC([NH3+])c(cc2O)c1</chem> |
| 775 | <chem>[Zn]123[N+4]=C5C=c6n1c(=CC1=[N+])2C(=Cc2n3c(C=C4C(C=C)=C5C)c(C)c2C=C)C(C)=C1CCC(=O)[O-]c(CCC(=O)[O-])c6C</chem>                    |
| 776 | <chem>S1C2N(C(=O)C2NC(=O)CCCC([NH3+])C(=O)[O-])C(C(=O)[O-])=C(C1)C</chem>                                                                |
| 777 | <chem>Oc1ccc(cc1)CCCCCCC</chem>                                                                                                          |
| 778 | <chem>P(OCC[N+](C)(C)C(=O)([O-])[O-]</chem>                                                                                              |

|     |                                                                                                                                             |
|-----|---------------------------------------------------------------------------------------------------------------------------------------------|
| 779 | <chem>SC(Cc1cccc1)C(=O)NC(Cc1cccc1)C(=O)NC(Cc1cccc(O)cc1)C(=O)[O-]</chem>                                                                   |
| 780 | <chem>[S-]\C(=[NH+]\CCCC([NH3+])C(=O)[O-])\N</chem>                                                                                         |
| 781 | <chem>O(O)C1(N=C2N(C=C(NC2CC2CCCC2)c2ccc(O)cc2)C1=O)Cc1ccc(O)cc1</chem>                                                                     |
| 782 | <chem>P1(OC(CO)(C)C(O)COP(O1)(=O)[O-])(=O)[O-]</chem>                                                                                       |
| 783 | <chem>Brc1nc2c(ncnc2N)n1C1OC(COP(OP(OCC2OC([n+3]cc(ccc3)C(=O)N)C(O)C2O)(=O)[O-])(=O)[O-])C(O)C1OP(=O)([O-])[O-]</chem>                      |
| 784 | <chem>Clc1c2OC(=O)C(NC(=O)c3cc(CC=C(C)C)c(O)cc3)=C([O-])c2ccc1OC1OC(C)(C)C(OC)C(OC(=O)c2[nH]c(cc2)C)C1O</chem>                              |
| 785 | <chem>S1C(O)c2c(OC1N)cccc2</chem>                                                                                                           |
| 786 | <chem>P(OCCCN1C2=C(NC(=O)NC2=O)N(CC(O)C(O)C(O)CO)C1=O)(=O)([O-])[O-]</chem>                                                                 |
| 787 | <chem>[Hg]c1ccc(cc1)C(=O)[O-]</chem>                                                                                                        |
| 788 | <chem>S(OC1COC(=CC1O)C(=O)[O-])(=O)(=O)[O-]</chem>                                                                                          |
| 789 | <chem>S(Cc1cccc1)CC(NC(=O)C(NC(=O)N1CCOCC1)Cc1cccc1)C=O</chem>                                                                              |
| 790 | <chem>[NH+](CCC=C(C)C(C)[C@H]1CCC(=CC1)C</chem>                                                                                             |
| 791 | <chem>O1C(CO)C(O)C(O)C1O</chem>                                                                                                             |
| 792 | <chem>O1C(C(O)C(O)CO)C(NC(=O)C)C(O)C=C1C(=O)[O-]</chem>                                                                                     |
| 793 | <chem>O=C(NCC([NH3+])C(=O)[O-])c1cccc1</chem>                                                                                               |
| 794 | <chem>O=C([O-])CCC(C)C</chem>                                                                                                               |
| 795 | <chem>P(OCC(N)Cc1[nH]cnc1)(=O)([O-])[O-]</chem>                                                                                             |
| 796 | <chem>P(O)(=O)([O-])CCCC</chem>                                                                                                             |
| 797 | <chem>O=C([O-])c1cc2c([nH]cc2)cc1NC(=O)C(=O)[O-]</chem>                                                                                     |
| 798 | <chem>P(=O)([O-])([O-])c1cc(ccc1OCC(=O)[O-])CC(NC(=O)C)C(=O)NC(C)c1cc(C(=O)N)c(OCC2CCCC2)cc1</chem>                                         |
| 799 | <chem>Brc1ccc(OCCCON2C(N=C([NH+]=C2N)N)(C)C)cc1</chem>                                                                                      |
| 800 | <chem>O(C)c1ccc(cc1)-c1[nH]c2c(n1)cccc2C(=O)N</chem>                                                                                        |
| 801 | <chem>O1C(C[NH+](CC1C)CCCCCCCNC=O)C</chem>                                                                                                  |
| 802 | <chem>P(OC1OC(C(=O)[O-])C(O)C(O)C1O)(OP(OCC1OC(n2c3N=C(NC(=O)c3nc2)N)C(O)C1O)(=O)[O-])(=O)[O-]</chem>                                       |
| 803 | <chem>S(S)CCNC(=O)CCNC(=O)C(O)C(COP(OP(OCC1OC(n2c3ncnc(N)c3nc2)C(O)C1OP(=O)([O-])[O-])(=O)[O-])(=O)[O-])(C)C</chem>                         |
| 804 | <chem>O=C([O-])C([NH3+])(CC(C)C)C</chem>                                                                                                    |
| 805 | <chem>OC(C(CC(=O)[O-])C(=O)[O-])(C(=O)[O-])C</chem>                                                                                         |
| 806 | <chem>O=C(C(C)C)C(=O)[O-]</chem>                                                                                                            |
| 807 | <chem>OC(C([NH3+])Cc1cccc1)C(=O)N1CCCC1C(=O)N1CCCC1C(=O)NC(C(=O)N)C</chem>                                                                  |
| 808 | <chem>OCCC(=O)C</chem>                                                                                                                      |
| 809 | <chem>O1C(CO)C(O)C(O)C(O)C1OC1C(O)C(O)C(O)NC1CO</chem>                                                                                      |
| 810 | <chem>P(OC1OC(CO)C(F)C(O)C1O)(OP(OCC1OC(N2C=C(C(=O)NC2=O)C(O)C1O)(=O)[O-])(=O)[O-]</chem>                                                   |
| 811 | <chem>O(C(=O)COWN=C(/C1(CC1)c1cc2nc(n(c2cc1)C)CNc1ccc(cc1)C(=[NH2+])N)\c1ncccc1)CC</chem>                                                   |
| 812 | <chem>S(CCNC(=O)CCNC(=O)C(O)C(COP(OP(OCC1OC(n2c3ncnc(N)c3nc2)C(O)C1OP(=O)([O-])[O-])(=O)[O-])(=O)[O-])(C)C)C(=O)\C=C\c1ccc(N(C)C)cc1</chem> |
| 813 | <chem>O=C1NC(=O)NC(NCC(O)C(O)C(O)CO)=C1N=O</chem>                                                                                           |
| 814 | <chem>O(C)c1cc2[nH]cnc2cc1</chem>                                                                                                           |
| 815 | <chem>Clc1ccc(cc1)C1N(C(=O)N2CC[NH2+]CC2)C(=NC1c</chem>                                                                                     |

|     |                                                                                                                                        |
|-----|----------------------------------------------------------------------------------------------------------------------------------------|
|     | <chem>Iccc(Cl)cc1)c1cccc(OC)cc1OC(C)C</chem>                                                                                           |
| 816 | <chem>Ic1ccc(cc1)c1[O-]CC(NC(=O)C)C(=O)NC(C(O)C)C(=O)[O-]</chem>                                                                       |
| 817 | <chem>O1[N-]C(=O)C2=C1CCCC=C2C[C@H]([NH3+])C(=O)[O-]</chem>                                                                            |
| 818 | <chem>S(CC(NC(=O)CCC([NH3+])C(=O)[O-])C(=O)NCCC(=O)[O-])CO</chem>                                                                      |
| 819 | <chem>O=C(N)CC</chem>                                                                                                                  |
| 820 | <chem>O=C([O-])[C@]([NH3+])(CC)C</chem>                                                                                                |
| 821 | <chem>S(=O)(=O)(N)c1ccc(cc1)C(=O)NCc1ccc(F)cc1F</chem>                                                                                 |
| 822 | <chem>O=C([O-])C</chem>                                                                                                                |
| 823 | <chem>S(CC(NC(=O)CCC([NH3+])C(=O)[O-])C(=O)NCCC(=O)[O-])C1c2c(-c3c(cccc3)C1O)cccc2</chem>                                              |
| 824 | <chem>P(OCC1OC(n2c3nenc(N)c3nc2)C(O)C1O)(OC(=O)C(N)Cc1[nH]cnc1)(=O)[O-]</chem>                                                         |
| 825 | <chem>O=C([O-])C(=N)C</chem>                                                                                                           |
| 826 | <chem>O=C(NC1CCCCC1)NCCCc1cccc1</chem>                                                                                                 |
| 827 | <chem>BrC1cc(cc(-c2[nH]c3c(c2)cc(cc3)C(=[NH2+])N)c1O)C</chem>                                                                          |
| 828 | <chem>O=C([O-])C([NH3+])C#C</chem>                                                                                                     |
| 829 | <chem>[V](O[V](O)O)(O[V](O)O)(O)O</chem>                                                                                               |
| 830 | <chem>O=C([O-])CCCCCCC\C=C\CCCCCCCC</chem>                                                                                             |
| 831 | <chem>O=C([O-])CCC([NH3+])CC</chem>                                                                                                    |
| 832 | <chem>OCCC([NH3+])(CCO)CCO</chem>                                                                                                      |
| 833 | <chem>S(=O)(=O)(NC(Cc1cc(ccc1)C(=[NH2+])N)C(=O)N1CCCCC1C(=O)[O-])c1cc2c(cc1)cccc2</chem>                                               |
| 834 | <chem>Oc1c2c(ccc1[C@@H](CC)C)cc1c(C(=O)C[C@H](C1)[C@H](OC)C(=O)[C@@H](O)[C@H](O)C)c2O</chem>                                           |
| 835 | <chem>O1C(CO)C(OC2OC(CO)C(O)C(O)C2O)C(O)C(O)C1OC1C(O)C(O)C(OC1CO)O</chem>                                                              |
| 836 | <chem>O=C(N)c1cc(N2CC2)c([N+](=O)[O-])cc1[N+](=O)[O-]</chem>                                                                           |
| 837 | <chem>O=C([O-])CCCCCCC\C=C\CCCCCCC</chem>                                                                                              |
| 838 | <chem>OC1CC(O)C\C(=C\C=C\2/C3CCC(C\AC=C\C=C(O)(CC)CC)C3(CCC/2)C)\C1=C</chem>                                                           |
| 839 | <chem>Oc1nc(nc2c1cc(cc2)CC(C(=O)[O-])c1ccc(cc1)C(=O)NC(CCC(=O)[O-])C(=O)[O-])N</chem>                                                  |
| 840 | <chem>Clc1c2c(CCC[NH2+])C2)ccc1Cl</chem>                                                                                               |
| 841 | <chem>P(OCC(O)C(O)C(O)C(=O)CO)(=O)([O-])[O-]</chem>                                                                                    |
| 842 | <chem>SCCCNC(=O)C(NC(=O)CNC(=O)C(NC(=[NH2+])N)C1CCCCC1)C</chem>                                                                        |
| 843 | <chem>ClC=1CCC2N(C(=O)C2NC(=O)C([NH3+])c2cccc2)C=1C(=O)[O-]</chem>                                                                     |
| 844 | <chem>O=C(CCC([NH3+])C(=O)[O-])C</chem>                                                                                                |
| 845 | <chem>S1C(\C=C(\C=C)/C)C(C)[O-]=C(C)C1=O</chem>                                                                                        |
| 846 | <chem>O1C(C(=O)[O-])C(OC)C(O)C(O)C1O</chem>                                                                                            |
| 847 | <chem>Oc1cc2c(CCC2[NH2+])CC#C)cc1</chem>                                                                                               |
| 848 | <chem>S=C1NC(C(C(OCC)=O)=C(N1)C)c1cc(O)ccc1</chem>                                                                                     |
| 849 | <chem>O(CCOCCOC)CCOCCO</chem>                                                                                                          |
| 850 | <chem>Clc1ccc(NC(=O)Nc2ccc(cc2)C(=[NH2+])N)cc1</chem>                                                                                  |
| 851 | <chem>S(CC([NH3+])C(=O)[O-])CC(=O)[O-]</chem>                                                                                          |
| 852 | <chem>O=C([O-])C=O</chem>                                                                                                              |
| 853 | <chem>O=C([O-])CCCC</chem>                                                                                                             |
| 854 | <chem>OC1C(O)CC(C=C1[O-])C(=O)[O-]</chem>                                                                                              |
| 855 | <chem>OC(CO)C</chem>                                                                                                                   |
| 856 | <chem>O=C1N[C@@H](CCCC(=O)[O-])C(=O)N[C@@H](CCCN=C(\NC(=O)C)/N)C(=O)N2[C@H](CCC2)C(=O)N[C@H]2C[C@@H](O)N([C@H]1Cc1[nH]cnc1)C2=O</chem> |

|     |                                                                                                                                   |
|-----|-----------------------------------------------------------------------------------------------------------------------------------|
| 857 | <chem>O=C([O-])C\C(=C\C(=O)[O-])\C(=O)[O-]</chem>                                                                                 |
| 858 | <chem>O(C(C)(C)C)C(=O)NC(Cc1cccc1)C(=O)CC(Cc1ccc(cc1)C(=O)NC(CCC(=O)N)C(=O)NC(Cc1cccc1)C(=O)N</chem>                              |
| 859 | <chem>P(OC1OC(CO)C(O)C(O)C1O)(OP(OCC1OC(N2C=C(C(=O)NC2=O)C(O)C1O)(=O)[O-])(=O)[O-]</chem>                                         |
| 860 | <chem>O=C/1NC(=N\C\1=C\1/CCNC(=O)c2[nH]ccc/12)N</chem>                                                                            |
| 861 | <chem>O=C1NC(=NC=2NCC(N(C1=2)C)CNc1ccc(cc1)C(=O)NC(CCC(=O)[O-])C(=O)[O-])N</chem>                                                 |
| 862 | <chem>OC(CC(=O)[O-])(CC(=O)[O-])C</chem>                                                                                          |
| 863 | <chem>O=CN(C(C)c1cccc1)C</chem>                                                                                                   |
| 864 | <chem>OC[C@@H]([NH3+])C(C)C</chem>                                                                                                |
| 865 | <chem>O=C([O-])C([NH3+])CCC=O</chem>                                                                                              |
| 866 | <chem>O=C1NC(=NC=2NCC(=NC1=2)C(O)C(O)C)N</chem>                                                                                   |
| 867 | <chem>S(=O)(=O)(NC(CC#CCOC)C(=O)[O-])c1ccc(cc1)-c1ccc(OC)cc1</chem>                                                               |
| 868 | <chem>[Co]123n4c5C=c6n1c(=Cc1n2c(C=c2n3c(=Cc4c(C)c5CCC(=O)[O-])c(CCC(=O)[O-])c2C)c(CCC(=O)[O-])c1C)c(CCC(=O)[O-])c6C</chem>       |
| 869 | <chem>O(C(=O)C(Cc1cc(ccc1)C(=[NH2+])N)C(NC(=O)c1ccc(cc1)-c1ccc(cc1)C[NH3+])C)C</chem>                                             |
| 870 | <chem>O=C1N2C(CCC2)C(=O)NC1CCC[NH+]=C(N)N</chem>                                                                                  |
| 871 | <chem>[As+](c1cccc1)(c1cccc1)(c1cccc1)c1cccc1</chem>                                                                              |
| 872 | <chem>Fc1cc(ccc1O)C[C@H]([NH3+])C(=O)[O-]</chem>                                                                                  |
| 873 | <chem>O1C(CO)C(O)C(O)C1n1c2nccc2nc1</chem>                                                                                        |
| 874 | <chem>[Hg](I)I</chem>                                                                                                             |
| 875 | <chem>Fc1cc(F)ccc1CO</chem>                                                                                                       |
| 876 | <chem>P(OCC1OC2([N-]C(=O)N(CCCC(N(O)CO)C(=O)[O-])C2=O)C(O)C1O)(=O)([O-])[O-]</chem>                                               |
| 877 | <chem>O=C([O-])CCc1c2[nH]c(Cc3[nH]c(Cc4[nH]c(Cc5[nH]c(C2)c(CCC(=O)[O-])c5C)c(C)c4CCC(=O)[O-])c(C)c3CCC(=O)[O-])c1C</chem>         |
| 878 | <chem>Oc1c(cccc1O)C(=O)N</chem>                                                                                                   |
| 879 | <chem>OC[C@@H](O)[C@@H](O)CO</chem>                                                                                               |
| 880 | <chem>[PH](OC(C)C)(OC(C)C)=O</chem>                                                                                               |
| 881 | <chem>[Mo+9]([O-])([O-])[O-]</chem>                                                                                               |
| 882 | <chem>S(C(=O)CC(=O)[O-])CCNC(=O)CCNC(=O)C(O)C(COP(OP(OCC1OC(n2c3nenc(N)c3nc2)C(O)C1OP(=O)([O-])[O-])(=O)[O-])(=O)[O-])(C)C</chem> |
| 883 | <chem>O1C(C(O)CO)C(O)C(O)C1O</chem>                                                                                               |
| 884 | <chem>[nH]1c2c(cccc2)cc1</chem>                                                                                                   |
| 885 | <chem>Oc1ccc(cc1N)C</chem>                                                                                                        |
| 886 | <chem>O=C(N)C([NH3+])Cc1c2c([nH]c1)cccc2</chem>                                                                                   |
| 887 | <chem>O=C([O-])C(C([NH3+])C(=O)[O-])C</chem>                                                                                      |
| 888 | <chem>O=C([O-])C(CC(=O)[O-])CC(=O)[O-]</chem>                                                                                     |
| 889 | <chem>O1[C@H](CO)[C@@H](O)[C@H](O)[C@@H](O)C1=O</chem>                                                                            |
| 890 | <chem>P(OCC1OC(n2c3N=CNC(=O)c3nc2)C(O)C1O)(=O)([O-])[O-]</chem>                                                                   |
| 891 | <chem>O1C(CO)C(O)C(O)C1n1c[nH+]cc1N</chem>                                                                                        |
| 892 | <chem>O(Cc1cccc1)C=O</chem>                                                                                                       |
| 893 | <chem>O=C(N)c1ccc(cc1)C(=O)[O-]-c1ccc(cc1)-c1cccc1</chem>                                                                         |
| 894 | <chem>OC(CC(=O)[O-])CC(=O)[O-]</chem>                                                                                             |
| 895 | <chem>O1C[C@H]2O[C@@H](O)[C@@H](O)[C@H](O)[C@@H](O)[C@H]2O[C@]1(C(=O)[O-])C</chem>                                                |
| 896 | <chem>Clc1ccc(C(=O)[O-])c(N)c1O</chem>                                                                                            |
| 897 | <chem>Ic1c2c(ncnc2N)n(c1)[C@@H]1O[C@H](CO)[C@@H](O)[C@H]1O</chem>                                                                 |

|     |                                                                                                                                                                                                |
|-----|------------------------------------------------------------------------------------------------------------------------------------------------------------------------------------------------|
| 898 | <chem>o1cc(cc1)C(=O)N[C@@H](C(C)C)C(=O)N[C@@H](C(C)C)C(=O)N[C@@H](CC(C)C)C(=O)N[C@@H](\C=C\C(OCC)=O)C[C@@H]1CCNC1=O</chem>                                                                     |
| 899 | <chem>[nH+]1c2c(CCCC2)c(NCCCCCCCCNc2c3c([nH+]cc2)cccc3)c2c1cccc2</chem>                                                                                                                        |
| 900 | <chem>[nH+]1c2c(CCCC2)c(NCCCCCCCC[NH3+])c2c1ccc2</chem>                                                                                                                                        |
| 901 | <chem>O1[C@@H]2[C@H](NC1=O)c1c(cccc1)[C@@H]2C1=CN[C@@](Cc2cccc2)(C[C@H](O)[C@@H](NCOCCOCC)=O)Cc2cccc2)C1=O</chem>                                                                              |
| 902 | <chem>O1[C@H]2N3C=CC(=O)N=C3O[C@H]2[C@H](O)[C@H]1CO</chem>                                                                                                                                     |
| 903 | <chem>O1[C@@H]2[C@H](N=C1N(C)C)[C@@H](O)[C@H](O)[C@@H]1O[C@H](CO)[C@@H](O)[C@@H]3O[C@H](CO)[C@@H](O)[C@@H](O)[C@H]3NC(=O)C)[C@@H](O)[C@H]1NC(=O)C)[C@H]2CO</chem>                              |
| 904 | <chem>[NH2+](CCCNCCC[NH2+])CC(C)C</chem>                                                                                                                                                       |
| 905 | <chem>BrCCCCCO</chem>                                                                                                                                                                          |
| 906 | <chem>O=C([O-])[C@@H]([NH3+])Cc1ccc(cc1)-c1cccc1</chem>                                                                                                                                        |
| 907 | <chem>OB(O)[C@H](NC(=O)[C@@H](NC(=O)CC[C@H](NC(OC(C)C)C)=O)C(=O)[O-])CCCCNC(OCc1cccc1)=O)C</chem>                                                                                              |
| 908 | <chem>Clc1cc(ccc1Cl)-c1c([nH+]c(nc1N)N)C</chem>                                                                                                                                                |
| 909 | <chem>O(CCC[C@H]1C[C@](O)(C[C@@H](O)[C@@H]1O)C(=O)[O-])c1cccc1</chem>                                                                                                                          |
| 910 | <chem>S(\C(=N/OS(=O)(=O)[O-])\Cc1cccc1)[C@@H]1C[C@H](CO)[C@@H](O)[C@H](O)[C@H]1O</chem>                                                                                                        |
| 911 | <chem>S(O[C@H]1[C@@H](O)[C@H](O)[C@@H](OC[C@H](NC(=O)CCCCCCCCCCC\C=C/CCCCCCCC)[C@H](O)C=C\C(C)C)C(=O)[O-])C(=O)(=O)[O-]</chem>                                                                 |
| 912 | <chem>O=C1N[C@@H](C)C(=O)N[C@@H](CCC(C[C@@H]([C@@H](OC)Cc2cccc2)C)C)[C@H](C)C(=O)\N=C/CCC(=O)N(C)[C@@H](C)C(=O)N[C@@H](C)C(=O)N[C@@H](CC(C)C)C(=O)N[C@@H](C(=O)[O-])[C@@H]1C)\C(=O)[O-]</chem> |
| 913 | <chem>S(=O)(=O)(NCCCC[C@H]([NH3+])C(=O)[O-])c1c2c(ccc1)c(N(C)C)ccc2</chem>                                                                                                                     |
| 914 | <chem>O1[C@H](CO)[C@@H](O)[C@H](O)[C@@H]2O[C@H](CO)[C@@H](O)[C@H](O)[C@@H]2O[C@@H]2O[C@@H](C)[C@@H](O)[C@@H](O)[C@@H]2O)[C@@H](N[C@@H](O)C)[C@@H]1O</chem>                                     |
| 915 | <chem>O1[C@H](CO)[C@@H](O)[C@H](O)[C@@H](O)[C@@H]1OCCCCCCCC(OC)=O</chem>                                                                                                                       |
| 916 | <chem>O[C@H]1C[C@H]2[NH+](C[C@H](CC2)[C@H]1C(OC)=O)C</chem>                                                                                                                                    |
| 917 | <chem>BrC1cc(ccc1O)C1(OC(=O)c2c3c1cccc3c(Cl)cc2)c1cc(Br)c(O)cc1</chem>                                                                                                                         |
| 918 | <chem>S(=O)([O-])(=Nc1nn[nH]n1)c1cc2c(Oc3c(cccc3)C2=O)cc1</chem>                                                                                                                               |
| 919 | <chem>S(C[C@H](NC(=O)CC[C@H]([NH3+])C(=O)[O-])C(=O)NCC(=O)[O-])C</chem>                                                                                                                        |
| 920 | <chem>S(=O)(=O)(N1CCC[NH2+])CC1)c1c2c(ccc1)C(=O)NC=C2</chem>                                                                                                                                   |
| 921 | <chem>Ic1c(C(=O)[O-])c(I)cc(I)c1NC(=O)CCCC(=O)Nc1c(I)c(C(=O)[O-])c(I)cc1I</chem>                                                                                                               |
| 922 | <chem>s1cc(nc1C)CN1CCN([C@@H](C(C)C)C(=O)N[C@H]([C@H](O)CN(S(=O)(=O)c2ccc(cc2)\C=N[O-])CC(C)C)Cc2cccc2)C1=O</chem>                                                                             |

|     |                                                                                                                                                                          |
|-----|--------------------------------------------------------------------------------------------------------------------------------------------------------------------------|
| 923 | <chem>P(OC[C@@H](OC(=O)CCCCCCC\C=C/CCCCC)COC(=O)CCCCCCC\C=C/CCCCCCC)(=O)([O-])[O-]</chem>                                                                                |
| 924 | <chem>Clc1cc(Nc2ccccc2C(=O)[O-])cc(Cl)c1OOO</chem>                                                                                                                       |
| 925 | <chem>O=C1N=C(NC=2NC[C@@H](N(C1=2)C)C)Nc1ccc(c1)C(=O)N[C@@H](CCC(=O)[O-])C(=O)[O-]N</chem>                                                                               |
| 926 | <chem>O1[C@H]2[C@H](OC[C@H]2Oc2ccc(cc2)C(=[NH2+])N)[C@@H](Oc2cc(ccc2)C(=[NH2+])N)C1</chem>                                                                               |
| 927 | <chem>O[C@@H]1CC(C[C@@H](O)C1)=C\C=C/1\C2CC[C@H]([C@@H](CC#CC(O)(C)C)C)[C@]2(CCC\1)C</chem>                                                                              |
| 928 | <chem>s1c2c(nc1)C([O-])=C(CCCCCCCCCC)C(=O)C2=O</chem>                                                                                                                    |
| 929 | <chem>S(=O)(=O)([O-])Nc1n(nc(c1)-c1cccc1)C</chem>                                                                                                                        |
| 930 | <chem>O1C(C)C(NC(=O)c2ncccc2O)C(=O)NC(CC)C(=O)N2C(CCC2)C(=O)N(C)C(Cc2cccc2)C(=O)N2C(CC(=O)CC2)C(=O)NC(c2cccc2)C1=O</chem>                                                |
| 931 | <chem>Oc1c2c(ccc1)C(=O)c1c(C2=O)c(O)ccc1</chem>                                                                                                                          |
| 932 | <chem>O=C(NNC(C)C)c1ccncc1</chem>                                                                                                                                        |
| 933 | <chem>O=C(NNCCC(=O)NCc1cccc1)c1ccncc1</chem>                                                                                                                             |
| 934 | <chem>[NH+](=C(\[NH+]=C(N)N)/N)/CCCC</chem>                                                                                                                              |
| 935 | <chem>BrC1ccc(cc1)C(=CC[NH+](C)C)c1cccc1</chem>                                                                                                                          |
| 936 | <chem>O(C(=O)CC)[C@@H]1[C@@]2([C@H]([C@H]3[C@H](CC2)[C@@]2([C@H](C[C@H](OC(=O)C)[C@@H]([NH+]4CCCC4)C2)CC3)C)C[C@@H]1[N+](CCCC1)CC=C)C</chem>                             |
| 937 | <chem>[NH2+]=C(N)N1CCc2c(C1)cccc2</chem>                                                                                                                                 |
| 938 | <chem>o1cnc1-c1ccc(NC(=O)Nc2cc(ccc2)CNC(O)[C@H]2CCOC2)=O)cc1OC</chem>                                                                                                    |
| 939 | <chem>BrC1cc2N=CN(CC(=O)CC3[NH2+])CCC[C@H]3O)C(=O)c2cc1Cl</chem>                                                                                                         |
| 940 | <chem>Clc1cccc1-c1nc(sc1)NC(=O)c1n(c2c(c1)cccc2)CC(=O)[O-]</chem>                                                                                                        |
| 941 | <chem>O1c2n(CCC1)c1c(ccc1)c2C(=O)NCC1CC[NH+](C1)CCCC</chem>                                                                                                              |
| 942 | <chem>O1[C@H](CO)[C@@H](O)[C@H](O)[C@@H](O)C1n1c2cc(O)ccc2c2c3c(c4c5c([nH]c4c12)cc(O)cc5)C(=O)N(NC(CO)CO)C3=O</chem>                                                     |
| 943 | <chem>O(C)c1nc(O[C@@H](C(OC)(c2cccc2)c2cccc2)C(=O)[O-])nc(OC)c1</chem>                                                                                                   |
| 944 | <chem>O1c2c3c(OC(=O)C=C3CCC)c3c(O[C@H](C)[C@@H](C)[C@@H]3O)c2C=CC1(C)C</chem>                                                                                            |
| 945 | <chem>O[C@@H]1CC(C[C@@H](O)C1=C)=C\C=C/1\C[C@@H]2CC[C@H]([C@H](CC)C)[C@]2(CCC\1)C</chem>                                                                                 |
| 946 | <chem>S1SCC(NC(=O)C(NC(=O)C(NC(=O)C(NC(=O)C(NC(=O)C(NC(=O)C([NH3+])Cc2cccc2)C1)Cc1ccc(O)cc1)Cc1c2c([nH]c1)cccc2)CCCC[NH3+])C(C)C(=O)NC(Cc1c2c([nH]c1)cccc2)C(=O)N</chem> |
| 947 | <chem>O=C(N(CC)CC)[C@@]1(C[C@@H]1C[NH3+])c1ccc1</chem>                                                                                                                   |
| 948 | <chem>O(CCC)c1cc2[nH]c(nc2cc1)NC(OC)=O</chem>                                                                                                                            |
| 949 | <chem>Clc1c(OC)c(ccc1N)C(=O)NC1C2CCC[NH+](C2)CC1</chem>                                                                                                                  |
| 950 | <chem>O(C)c1cc(ccc1OC)C(=O)NCc1ccc(OCC[NH+](C)C)c1</chem>                                                                                                                |
| 951 | <chem>ClC(Cl)=CC1C(C)C1C(OCc1cc(Oc2cccc2)ccc1)=O</chem>                                                                                                                  |
| 952 | <chem>O=C(Nc1cc2c(cc1)C(CCC2(C)C)(C)C)c1ccc(cc1)C(=O)[O-]</chem>                                                                                                         |
| 953 | <chem>O1[C@H](CO)[C@@H](O)[C@@H](O)[C@@H]1n1c2ncnc(N[C@@H]3CCOC3)c2nc1</chem>                                                                                            |

|     |                                                                                                                                                                  |
|-----|------------------------------------------------------------------------------------------------------------------------------------------------------------------|
| 954 | C1c1ccc(ccc1)C1=CC(=O)N(c2c1ccc(cc2)[C@]([NH3+])c1ccc(Cl)cc1)c1n(cnc1)C)C                                                                                        |
| 955 | O=C1N=C(N)C2N1C2                                                                                                                                                 |
| 956 | O1[C@H](C(=O)NCC)C(O)C(O)[C@@H]1n1c2nc(nc(N)c2nc1)C#CCC1CCC(CC1)C(OC)=O                                                                                          |
| 957 | Fe1cccc1-c1onc(n1)-c1cc(ccc1)C(=O)[O-]                                                                                                                           |
| 958 | ClC(=NOC[C@H](O)C[NH+])1CCCCC1)c1ccc[n+](O-)]c1                                                                                                                  |
| 959 | O1[C@@H]2[C@]34CC[NH+](C@H)(Cc5c3c1c(O)cc5)[C@]4(O)CCC2=O)CC1CC1                                                                                                 |
| 960 | [Mo-2]([SH2+])[SH2+]                                                                                                                                             |
| 961 | S1[C@H]2[C@@H]3N([C@H](c4c2c(OC(=O)C)c(c2OCOc24)C)COC(=O)[C@@]2(NCCc4cc(O)c(OC)c24)C1)[C@@H](O)[C@H]1[NH+](C@@H]3c2c(c(C)c(OC)c2O)C1)C                           |
| 962 | O1c2c3c(cccc3O[C@@H]3O[C@H](C)[C@H](O)[C@@](O)(C)[C@H]3O[C@H]3O[C@H](C)[C@H](O)[C@H](OC)[C@H]3[NH3+])c(O)c3c2-c2c(c(ccc2OC3=O)C)C1=O                             |
| 963 | O=C(C[C@@H]1[NH+](C)[C@@H](CCC1)C[C@H](O)c1cccc1)c1cccc1                                                                                                         |
| 964 | FC(F)(F)Oe1ccc(cc1)CO[C@H]1Cn2cc([N+](=O)[O-])nc2OC1                                                                                                             |
| 965 | FC(F)(F)C1=CC(=O)Nc2c1cc(N1[C@@H](CC[C@@H]1)[C@@H](O)C(F)(F)F)C)cc2                                                                                              |
| 966 | O1[C@@H]2C[C@H](O)[C@@]3([C@H]([C@H](OC(=O)c4cccc4)[C@]4(O)C[C@H](OC(=O)[C@H](O)[C@@H](NC(=O)c5cccc5)c5cccc5)C(=C([C@H](OC(=O)C)C3=O)C4(C)C)C)[C@]2(OC(=O)C)C1)C |
| 967 | BrC1cc(F)c(Nc2nnc3c2cc(OC)c(OCC2CC[NH+](CC2)C)c3)cc1                                                                                                             |
| 968 | s1cc(nc1-c1cc(OCC)c(OCC)cc1)-c1nc(ccc1)C(=O)[O-]                                                                                                                 |
| 969 | BrC1cc(F)c(cc1)CN1C(=O)[C@@]2(n3c(ccc3)C1=O)CC(=O)NC2=O                                                                                                          |
| 970 | O=C1C[C@@H](O)[C@H](\C=C\CC(O)(CCCC)C)[C@H]1CCCCCCC(OC)=O                                                                                                        |
| 971 | [NH3+][CCc1[nH]cnc1                                                                                                                                              |
| 972 | [Cl+](O-)[O-]                                                                                                                                                    |
| 973 | Clc1cc(Nc2nnc3c2cc(NC(=O)C=C)c(OCCCN2CCOCC2)c3)ccc1F                                                                                                             |
| 974 | O(CCOCCOCCOC)c1cc2=NC=C3N=C(C=c4[nH]c(=CC5=NC(=CN=c2cc1OCCOCCOCCOC)C(C)=C5CCCO)c(CC)c4CC)C(CCCO)=C3C                                                             |
| 975 | ClC(Cl)C(OC1(CC[C@H]2[C@H]3[C@@H]([C@@]4(C(=CC(=O)C=C4)CC3)C)[C@@H](O)C[C@]12C)C(OCC)=O)=O                                                                       |

|      |                                                                                                                                                                                                                         |
|------|-------------------------------------------------------------------------------------------------------------------------------------------------------------------------------------------------------------------------|
| 976  | ClC12C(C3CC(C)C(O)(C(=O)CO)C3(CC1O)C)CCC1=CC(=O)C=CC12C                                                                                                                                                                 |
| 977  | O(CCC[NH+]1CCCCC1)c1cc2nnc(N3CCN(CC3)C(=O)Nc3ccc(OC(C)C)cc3)c2cc1OC                                                                                                                                                     |
| 978  | O=C(N[C@@H](Cc1c2c([nH]c1)cccc2)C(=O)[O-])CC[C@@H]([NH3+])C(=O)[O-]                                                                                                                                                     |
| 979  | O1[C@@H]2[C@]34CC[NH+](C@H)(Cc5c3c1c(O)cc5)[C@]4(O)CCC2=O)CC1CC1                                                                                                                                                        |
| 980  | O1[C@@H]2[C@]34CC[NH+](C@H)(Cc5c3c1c(O)cc5)[C@]4(O)CC[C@@H]2O)CC1CCC1                                                                                                                                                   |
| 981  | Clc1cc(ccc1C1CCCC1)\C=C/[NH+](CC)C1CCCC1                                                                                                                                                                                |
| 982  | S(SCCNC(=O)CC[NH3+])CCNC(=O)CC[NH3+]                                                                                                                                                                                    |
| 983  | S(O[C@@H]1CC2=CC[C@H]3[C@@H]4CCC(=O)[C@]4(CC[C@@H]3[C@]2(CC1)C)C)(=O)(=O)[O-]                                                                                                                                           |
| 984  | [Si](CCc1c2c(nc3c1cccc3)C=1N(C2)C(=O)C2=C(C=1)[C@@](O)(CC)C(OC2)=O)(C)C                                                                                                                                                 |
| 985  | O=C(N(C1CC[NH+](CC1)CCc1cccc1)c1cccc1)CC                                                                                                                                                                                |
| 986  | O=C(N)c1cc2c(nc1)cccc2                                                                                                                                                                                                  |
| 987  | O(C(=O)C(=O)C)CC                                                                                                                                                                                                        |
| 988  | [NH3+][CCc1[nH]cnc1                                                                                                                                                                                                     |
| 989  | o1c2c(cc1C(=O)N[C@H]1C3CC[NH+](CC3)[C@H]1Cc1ccnc1)cccc2                                                                                                                                                                 |
| 990  | OC[C@H](Nc1nc(NCc2cccc2)c2nnc(c2n1)C(C)C)C                                                                                                                                                                              |
| 991  | s1cccc1C[C@H](NC(=O)CNC(=O)C1N(C[C@H](O)C1)C(=O)C1N(CCC1)C(=O)C(NC(=O)[C@H]([NH3+])CCC[NH+]=C(N)N)CCC[NH+]=C(N)N)C(=O)N[C@H](C(=O)N1Cc2c(CC1C(=O)N1[C@@H]3[C@H](CC1C(=O)N[C@@H](CCC[NH+]=C(N)N)C(=O)[O-])CCCC3)cccc2)CO |
| 992  | FC(F)(F)COc1cccc1OCC[NH2+][C@@H](Cc1cc(c2N(CCc2c1)CCCO)C(=O)N)C                                                                                                                                                         |
| 993  | S([C@H]1C[C@H]([NH2+])C1)CNS(=O)(=O)N)C=1[C@@H]([C@H]2N(C=1C(=O)[O-])C(=O)[C@@H]2[C@H](O)C)C                                                                                                                            |
| 994  | Clc1cc2c(N(CCC[C@H]2O)C(=O)c2ccc(NC(=O)c3cccc3)cc2)cc1                                                                                                                                                                  |
| 995  | Clc1cc2C3C(c4c(Oc2cc1)cccc4)CN(C3)C                                                                                                                                                                                     |
| 996  | FC=C\1/[C@H](O)[C@H](O[C@H]/1N1C=CC(=N)C1=O)N)CO                                                                                                                                                                        |
| 997  | o1cccc1CNC(=O)c1cccc1N(C(=O)COc1cccc1)C                                                                                                                                                                                 |
| 998  | S(Oc1ccc(cc1)CCOc1ccc(cc1)C[C@H](OCC)C(=O)[O-])(=O)(=O)C                                                                                                                                                                |
| 999  | O[C@H]1[C@@H](C(NC(=O)C)C(CC)CC)[C@H]([NH+]=C(N)N)C[C@@H]1C(=O)[O-]                                                                                                                                                     |
| 1000 | Fe1ccc(cc1)CNc1[nH+]c(N)c(NC(OCC)=O)cc1                                                                                                                                                                                 |

**Supplemental Table 12: random sample from PubChem database representing small organic compounds without drug related properties and without subcellular localization information.** Structure is presented as the *Simplified Molecular Input Line Entry Specification string of the major microspecies at pH 7.4, as calculated by ChemAxon.*

| ID | Chemical Structure                                                                          |
|----|---------------------------------------------------------------------------------------------|
| 1  | <chem>O1[C@](O[C@H]2O[C@H](CO)[C@@H](O)[C@H](O)[C@H]2O)(CO)[C@@H](O)[C@H](O)[C@H]1CO</chem> |
| 2  | <chem>O1c2cc(ccc2OC1)C=CC(=O)[O-]</chem>                                                    |
| 3  | <chem>OCC(=O)[O-]</chem>                                                                    |
| 4  | <chem>Fc1cc2c(N(C=C(C(=O)[O-])C2=O)C2CC2)c(OC)c1N1CC2C([NH2+])CCC2)C1</chem>                |
| 5  | <chem>O=C1CC[C@@H]2[C@@H]3[C@H]([C@@H]4CC[C@@](O)(C#C)[C@]4(CC3)CC)CCC2=C1</chem>           |
| 6  | <chem>S(=O)(=O)([O-])CC12CCC(CC1=O)C2(C)C</chem>                                            |
| 7  | <chem>O=C1N(CC(=O)Nc2ccccc2)C(=O)N(C)C1=O</chem>                                            |
| 8  | <chem>[NH+](N)=C(N)N</chem>                                                                 |
| 9  | <chem>O1C2C34C(C([NH+](CC3)C)Cc3c4c1c(OCC)cc3)C=C2O</chem>                                  |
| 10 | <chem>P1(OC2C(O1)C(OC2CO)n1c2ncnc(N)c2nc1)(=O)[O-]</chem>                                   |
| 11 | <chem>S=C([S-])N(C)C</chem>                                                                 |

|    |                                                                                |
|----|--------------------------------------------------------------------------------|
| 12 | <chem>ONc1cc2Cc3c(-c2cc1)cccc3</chem>                                          |
| 13 | <chem>C(CCCCCCCCCC)CCCCCCCCC</chem>                                            |
| 14 | <chem>FC(F)(F)C(=O)CCCCCCCCCCCCCCC</chem>                                      |
| 15 | <chem>N(=N)c1ccc(N(C)C)cc1)/c1cc(ccc1)C</chem>                                 |
| 16 | <chem>S(=O)(=O)(C(CC(=O)c1cccc1)c1ccccc1)c1ccc(N)cc1</chem>                    |
| 17 | <chem>n1cn(nc1)Cc1ccccc1</chem>                                                |
| 18 | <chem>[N+](CCCC)(CCC)(CCC)CCC</chem>                                           |
| 19 | <chem>C1CCOC(=O)Cc1ccccc1</chem>                                               |
| 20 | <chem>[n+]12c(-c3[n+](CC1)cccc3)cccc2</chem>                                   |
| 21 | <chem>[NH2+]1CCCC1C</chem>                                                     |
| 22 | <chem>C1C(Cl)C(=O)Nc1ccc(cc1)C</chem>                                          |
| 23 | <chem>O1C2=CC(=[N+](CC)CC)C=CC2=C(c2c1cc(N(CC)C)C)cc2)c1ccccc1C(=O)[O-]</chem> |
| 24 | <chem>FC(F)(F)C(=O)CCCC=CCC=CCC=CCCCC</chem>                                   |
| 25 | <chem>S(=O)(=O)(NCC(O)CNC(=O)C(CC(C)C)c1cc(ccc1)-c1ccccc1)c1ncccc1</chem>      |



|     |                                                                                                   |
|-----|---------------------------------------------------------------------------------------------------|
| 116 | [As](c1cccc1)(c1cccc1)c1cccc1                                                                     |
| 117 | C(CCC=C)CC=C                                                                                      |
| 118 | S1CCSC1=S                                                                                         |
| 119 | O=C([O-])C([NH3+])Cc1[nH]cnc1                                                                     |
| 120 | [n+](c1cccc1)CCCCCCCCCCCCCCC                                                                      |
| 121 | [nH]1nccc1                                                                                        |
| 122 | S(C(C)C)C                                                                                         |
| 123 | O=C1N(CC(=O)N)C(=O)N(CC(=O)N)C(=O)N1CC(=O)N                                                       |
| 124 | O(Cc1cccc1)C(=O)C(CC)(C[NH+](C)C)c1cccc1                                                          |
| 125 | P(OCC(O)C(O)C(O)CN1C=2NC(=O)NC(=O)C=2Nc2cc(C)c(cc12)C(=O)([O-])[O-]                               |
| 126 | O(C)c1c([N+](=O)[O-])cc([N+](=O)[O-])cc1[N+](=O)[O-]                                              |
| 127 | O=C(NN=C1CCCC1)c1ccc([N+](=O)[O-])cc1                                                             |
| 128 | O=C1NC(=O)NC1(C)C1CCCC1                                                                           |
| 129 | [N+](#C)c1ccc(cc1)C                                                                               |
| 130 | O=C1N(CCCC)C(=O)N(c2nnc(c12)CC(=O)C)CCCC                                                          |
| 131 | O(CCC)c1cc(N)ccc1C(OCC[NH+](CC)CC)=O                                                              |
| 132 | Oc1cc(C(=O)[O-])c([N+](=O)[O-])cc1                                                                |
| 133 | O(C)c1ccc(N=O)cc1                                                                                 |
| 134 | OCC[NH+](CCCC)CCO                                                                                 |
| 135 | O=C1CC[C@@]2([C@H]3[C@H]([C@@H]4CC[C@](OC(=O)C)(C(=O)C)[C@]4(CC3)C)C=C(C2=C1)C)C                  |
| 136 | O=C(NCCCCCNC(=O)CCN1CC1)CCN1CC1                                                                   |
| 137 | S=C=Nc1cc(N=C=S)ccc1C                                                                             |
| 138 | [As](Cl)(c1cccc1)c1cccc1                                                                          |
| 139 | Oc1c2NC(=CC(=O)c2ccc1)C(=O)[O-]                                                                   |
| 140 | n1c(nc(nc1N(C)C)N)N(C)C                                                                           |
| 141 | OC(CC(=O)[O-])(CCO)C                                                                              |
| 142 | O=C1N=C(NC(=N1)CC)c1cccc1                                                                         |
| 143 | P(OCC)(OCC)(OP(OC)OC)=O                                                                           |
| 144 | O1C(C(O)C(O)C(O)C1CO)c1c([O-])c(O)c2c(c1O)C(=O)c1c(cc(O)c(C(=O)[O-])c1C)C2=O                      |
| 145 | O1c2c3C4(C1CC(O)C=C4)CC[NH+](Cc3ccc2OC)C                                                          |
| 146 | n1c(ncnc1CC)CC                                                                                    |
| 147 | S(=O)(=O)(N1CCCC1COC)c1cc2c(NC(=O)C2=O)cc1                                                        |
| 148 | Nc1ccc(cc1)CCCCCCCCCCCC                                                                           |
| 149 | Ic1ccc(cc(C(=O)Nc2cc(Cl)c(cc2)C(=[NH2+])N)c1O)C                                                   |
| 150 | [n+](c1c2c(cccc2)c(N)c2c1cccc2)C                                                                  |
| 151 | O(CCCCC)c1ccc(cc1)-c1c2c([n+](c3c1cccc3)C)cccc2                                                   |
| 152 | O(CC[NH+](CCCC1)c1ccc(cc1)-c1[nH]c2c(cccc2)c1-c1cccc1                                             |
| 153 | OC(C([NH2+])C)C)c1ccc(N)cc1                                                                       |
| 154 | O=C([O-])CCC1C=2[NH2+])C(=CC3NC(=CC4[NH2+])C(C=C5NC(C=2)=C(CCC(=O)[O-])C5)C(C)C4C=C)C(C)C3C=C)C1C |
| 155 | O=C(N(CC)CC)N                                                                                     |
| 156 | O=C(Nc1c2c(c3c(c1)cccc3)cccc2)C                                                                   |
| 157 | O1CCN(CC1)CC#N                                                                                    |
| 158 | S(OOS(=O)(=O)[O-])(=O)(=O)[O-]                                                                    |
| 159 | FC(F)(F)c1cc(N=N)c2ccc(N(C)C)cc2ccc1                                                              |
| 160 | O(C)c1ccc([N+](=O)[O-])cc1                                                                        |
| 161 | O=C1N=C(Nc2ncc(nc12)C(O)C(O)C)N                                                                   |
| 162 | Clc1ccc(NC=O)cc1                                                                                  |
| 163 | Clc1ccc(cc1)C(=O)C([NH2+])C(CO)(C)C                                                               |

|     |                                                                                                                  |
|-----|------------------------------------------------------------------------------------------------------------------|
| 164 | C1c2c(-c3c1cccc3)cc1c(c2)cccc1                                                                                   |
| 165 | ON                                                                                                               |
| 166 | O(C)c1cc(C(N(CC(=O)[O-])CC(=O)[O-])CN(CC(=O)[O-])CC(=O)[O-])c([N+](=O)[O-])cc1OC                                 |
| 167 | O=C1N(CCC1)CCCCC[N+](C)(C)C                                                                                      |
| 168 | O=C([O-])CN(CC[NH+](CCN(CC(=O)[O-])CC(=O)[O-])CC(=O)[O-])CC(=O)[O-]                                              |
| 169 | O=CCCC=C                                                                                                         |
| 170 | [Ca+2]                                                                                                           |
| 171 | O(CC)c1ccc(cc1)C(OCC[NH+](CC)CC)=O                                                                               |
| 172 | O1C(C(N=C1C)(C(OC)=O)C(OC)=O)c1ccoc1                                                                             |
| 173 | O(C)c1cccc1N1C2=NC(NC(=C2N=C1)C(=O)N)(C)C                                                                        |
| 174 | S(=O)(=O)(N)N1CCN(CC1)C=1C(=O)N=C(NC=1N)C                                                                        |
| 175 | O=C1[N-]C(=O)C2(C3CCC(C=C3)C12C#N)C#N                                                                            |
| 176 | O(C)c1cc(ccc1OC)C\N=C\NC(=C(N)C#N)C#N                                                                            |
| 177 | [S+](CCCC1)Cc1oc(cc1)C[S+](CCCC1                                                                                 |
| 178 | S(=O)(=O)(NN=Cc1cccc1)c1ccc(cc1)C=C1NC(=O)NC1=O                                                                  |
| 179 | O=C1C(CCC1=CC=Cc1cccc1)CNc1cccc1                                                                                 |
| 180 | O(C(C)(C)C)C(=O)NC(=O)N(CC[NH+](CCCC1)C                                                                          |
| 181 | O=C1N2N(Cc3c(C2)cccc3)C=C1                                                                                       |
| 182 | O(C)C1=CC(=O)c2c(C1=O)c(O)ccc2O                                                                                  |
| 183 | Brc1ccc(cc1)-c1nc(sc1)NNC=1SC(=C2cc(OC)c(OC)c(OC)c2)C(=O)N=1                                                     |
| 184 | Oc1cc2CCC3C4CC[C@H](O)[C@]4(CCC3c2cc1C=C(C)C)C                                                                   |
| 185 | OC1[C@@H](O)CN(OCc2cccc2)C[C@H]1O                                                                                |
| 186 | O=C([O-])c1nc2c(nc1Nc1ccc(cc1)C(=O)[O-])cccc2                                                                    |
| 187 | s1cc(cc1)[C-](C(=O)c1occc1)CC(=O)c1occc1                                                                         |
| 188 | O=C([O-])C(N(CC(=O)[O-])CC(=O)[O-])c1cccc1                                                                       |
| 189 | Brc1cccc1S(=O)(=O)c1cccc1NC                                                                                      |
| 190 | Clc1cc(SSc2cc(Cl)c(cc2S(=O)([O-])=Nc2[nH]c3ccnc3n2)C(=O)Nc2cccc2)c(S(=O)([O-])=Nc2[nH]c3ccnc3n2)cc1C(=O)Nc1cccc1 |
| 191 | O1c2c(C34C1C[NH+](C(C3)CCC4)C)cccc2O                                                                             |
| 192 | Brc1sc(Br)c2c1C(=O)[C@H](Br)[C@H]2[NH3+]                                                                         |
| 193 | O(C(C)(C)C)C(=O)NCCCC([NH3+])C(=O)N                                                                              |
| 194 | O=C1c2c(CC13Cc1cc(ccc1C3)C(=O)C)cccc2                                                                            |
| 195 | Brc1c2c(cccc2)c(OCc2cccc2)cc1                                                                                    |
| 196 | O=C1C(CCCCC1=C)CCC(CCOC)=C                                                                                       |
| 197 | O(C)c1cc2CCc3c(nc4c3cc(OC)cc4)CC[NH+](3CCCC3)-c2cc1                                                              |
| 198 | S(=O)(=O)(N1CC(CN(S(=O)(=O)c2ccc(cc2)C)CCC[NH+](CCC1)CC(CC)C)=C)c1ccc(cc1)C                                      |
| 199 | O1[C@@H]2C3C=C(C[C@H](OC(=O)c4cccc4)C2[C@H](C)C1=O)C)C(=O)C=C3C                                                  |
| 200 | Clc1cc(SC(C(=O)[O-])c2cccc2)c(S(=O)([O-])=Nc2nc(nc(n2)N)N(C)C)cc1C                                               |
| 201 | s1cccc1C(=O)N(C(=O)N1CCCCC1)c1cccc1                                                                              |
| 202 | BrC(C(Cl)(C)C)CC\C(=C)C)CBr                                                                                      |
| 203 | s1c2N(c3cccc3)C(=S)N(CC(OCC)=O)C(=O)c2nc1SC                                                                      |
| 204 | O=C1n2c3e(nc2[N-]N=C1)cccc3                                                                                      |
| 205 | O(C)c1cc(Nc2nc(nc(n2)N)N)N(C(=O)C)cc1                                                                            |
| 206 | Clc1cc([S-])c(S(=O)(=O)NC=2NCCCN=2)cc1C                                                                          |
| 207 | P(OC(C)C)(OC(C)C)(=O)C(N(C(=[NH+])C=1OC(OCC)=NC(N=1)(C(F)(F)F)C(F)(F)F)N)C(C)C                                   |
| 208 | IC(C(=O)c1cccc1)=C1CCCC1C                                                                                        |

|     |                                                                                                     |
|-----|-----------------------------------------------------------------------------------------------------|
| 209 | Clc1cc([S-])c(S(=O)([O-])=Nc2nc([nH]n2)N)cc1C                                                       |
| 210 | s1cccc1C(=O)N1CCc2c(C1)cccc2                                                                        |
| 211 | O1[C@@H]2[C@]34C5([C@H]([NH+](CC3)C)Cc3c4c1e(OC)cc3)CC(C(O)(C)C)C2(OC)CC5                           |
| 212 | O(C(OC)CNC(=O)C(NC(=O)C=Cc1cccc1)C)C                                                                |
| 213 | O=C1c2c(N(c3ncccc13)CC[NH+](CC)CC)ccc1c2n(nc1)CC[NH+](CC)CC                                         |
| 214 | Clc1cc(NC)c(cc1)C(=O)N1CCC[C@H]1CO                                                                  |
| 215 | O=C1N2N(C3CCC2CC3)C(=O)N1c1cccc1                                                                    |
| 216 | O=C1C=C2C=C(NC=C2C=C1[O-])C(=O)Nc1cccc1                                                             |
| 217 | O=C1N(C(=O)C=2C(NNC=2N)=C1C#N)c1cccc1                                                               |
| 218 | O(Cc1cccc1)c1ccc(nc1)CC(N)C(OCc1cccc1)=O                                                            |
| 219 | OCc1nen(c1)C(c1cccc1)(c1cccc1)c1cccc1                                                               |
| 220 | ClCC1c2c(N(S(=O)(=O)c3[nH]c4c(cc(OC)cc4)c3)C1)c(N)cc2                                               |
| 221 | O1[C@@H]2C34C5(C6C(C2(OC)C=C5)C(=O)NNC6=O)C([NH+](CC3)C)Cc2c4c1c(OC)cc2                             |
| 222 | O=C1NC(=NC(=O)[CH-]1)NN1C(=NC(=Cc2cccc2)C1=O)c1cccc1                                                |
| 223 | ClCCSc1cccc1NC(=O)C=Cc1cccc1                                                                        |
| 224 | S(=O)(=O)(c1ccc(NC(=O)c2cccc2SC(=O)CCCC[n+])2cccc2)cc1)c1ccc(NS(=O)(=O)Cc2cccc2[N+](=O)[O-])cc1     |
| 225 | [S-]c1cc2c(NC(=CC2=O)c2cccc2)cc1                                                                    |
| 226 | O=C1NN=C(N1N=Cc1ccc1)C                                                                              |
| 227 | O(C(=O)[O-])C12C(CCCCC1)C(=O)C1C2CCCC1                                                              |
| 228 | OC(CNC(=O)Nc1cccc1)C[NH+](C)C                                                                       |
| 229 | O(C(=O)NC(NC(=O)C)Cc1cccc1)C                                                                        |
| 230 | O=C1N(c2c(cccc2)C(N=[N+]=[N-])=C1)c1cccc1                                                           |
| 231 | Clc1cc(ccc1Cl)C=C1C(=O)C([P+](c2cccc2)(c2cccc2)c2cccc2)=C([O-])C([P+](c2cccc2)(c2cccc2)c2cccc2)=C1O |
| 232 | O=C([O-])C([NH2+][C#C]C)Cc1cccc1                                                                    |
| 233 | S1CC2N(C1)C(=O)c1c(N=C2NCC(OCC)=O)cccc1                                                             |
| 234 | S1SCCC(=O)N[C@H](C(OC)=O)C1(C)C                                                                     |
| 235 | S1c2c(C(=Nc3c1cccc3)N)c(F)ccc2                                                                      |
| 236 | ClC(Cl)(P(=O)(CC)CC)C(O)C(C)C                                                                       |
| 237 | O1[C@@H](C)[C@](CC12CC[NH+](CC2)C)(C(=O)C)c1cccc1                                                   |
| 238 | O=C(NCC([N+](=O)[O-])(CNC(=O)c1cccc1)C)c1cccc1                                                      |
| 239 | O1CC2Cc3c(cc4OCc4c3)C1(C2CO)c1cc(OC)c(OC)c(OC)c1                                                    |
| 240 | O1C(CCC1N1C=CC(=NC1=O)N)(CO)C                                                                       |
| 241 | Fe1ccc(cc1)C(=O)CCC[NH+]1CCCC(Oc3c(cccc3)C(=O)N2)CC1                                                |
| 242 | Clc1cc(ccc1)COc1ccc(cc1)C=CC(=O)N(O)C                                                               |
| 243 | O1[C@@H]2[C@@H](C[C@@H](O)[C@@]1(CCC=C(CCC[C@H](C)[C@@H]2O)C)C)C1(CC1)C(OC)=O                       |
| 244 | O1C[C@@H](O)[C@H](n2c3ncnc(N)c3nc2)[C@@H]1C(OC)OC                                                   |
| 245 | Clc1ccc(cc1)CC1=NNC(=O)N1n1c(ccc1C)C                                                                |
| 246 | Oc1c(cccc1O)C(=O)NCCN(CCNC(=O)c1cccc(O)c1O)CCNC(=O)c1cccc(O)c1O                                     |
| 247 | O=C1c2c(CC1Cc1cc(ccc1C(OC)=O)C)c(ccc2)C                                                             |
| 248 | O1C(CO)C(O)C(O)C(OC2OCC(O)(COC(=O)C(=CCC(C(CO)C)C)C2O)C1O[C@@H]1OC=C(C2C1[C@@](O)(CC2)C)C(=O)[O-]   |
| 249 | OC[C@H]1C[C@H](CC1)Cn1nnc2c1nc(nc2N)N                                                               |
| 250 | O=C1N(N(C(=O)C)C(=O)C)C(=NN1C(=O)C)Cc1ccc(                                                          |

|     |                                                                                                                                                                                                       |
|-----|-------------------------------------------------------------------------------------------------------------------------------------------------------------------------------------------------------|
|     | cc1)C                                                                                                                                                                                                 |
| 251 | O1c2c(cc(cc2)C=N\c2cccc2O)C)C=CC12Oc1c(cccc1)C(=O)N2C                                                                                                                                                 |
| 252 | O1C(C(O)C(O)C1CO)c1oc(O[C@@H]2CC(CC[C@H]2C(C)C)C)nn1                                                                                                                                                  |
| 253 | O(c1ccc(cc1)C1(O)CC[NH+](CC1C(=O)c1ccc(Oc2ccc(cc2)C)cc1)CC)c1ccc(cc1)C                                                                                                                                |
| 254 | S(CCOCN1C(Cc2cccc2)=C(CC)C(=O)NC1=O)c1ccc(cc1)                                                                                                                                                        |
| 255 | O=C(NN=C(C)c1ncccc1)NN=C(C)c1ncccc1                                                                                                                                                                   |
| 256 | S1(=O)(=O)C(=Cc2cc(Oc3cccc3)ccc2)C(=O)N(C1c1cccc1)c1ccc(OC)cc1                                                                                                                                        |
| 257 | O=C1N(C(=O)C2C1C1CC(CCC1c1c2[nH]c2c1cccc2)C(C)(C)C)c1ccc([N+](=O)[O-])cc1                                                                                                                             |
| 258 | O(C)c1c(OC)cc(cc1OC)C=Nc1ncccc1                                                                                                                                                                       |
| 259 | S(=O)(=O)(N)c1cc(S(=O)(=O)N)ccc1[N-]C(=O)N=S(=O)([O-])c1ccc(cc1)C                                                                                                                                     |
| 260 | O(CC(=O)[O-])c1cc(nc2c1cc(OC)cc2)-c1cccc1                                                                                                                                                             |
| 261 | O(C)c1cc(\N=N\N2CCCC2)ccc1                                                                                                                                                                            |
| 262 | O=C(Nc1c2c(ccc1)cccc2)NCCCCC[NH2+]Cc1c2c(ccc1)cccc2                                                                                                                                                   |
| 263 | O1C2=C(CC1C(C)=C)C(=O)c1c(cccc1O)C2=O                                                                                                                                                                 |
| 264 | O(Cc1cccc1)c1cc(cc(O)c1)CCNC(=O)CCc1cc(O)c(O)cc1                                                                                                                                                      |
| 265 | O=C(NC(CCC(=O)NCCCCCCCCCCCC)C(=O)NCCC(CCCCCCCC)c1ccc(N(Cc2nc3c(nc(nc3N)N)nc2)C)cc1                                                                                                                    |
| 266 | s1c2c(cc1C(=O)C)C(=O)c1c(cc(cc1)C(=O)C)C2=O                                                                                                                                                           |
| 267 | S(C12C=CC(OC1=O)CC12CCOC1=O)c1ccc(cc1)C                                                                                                                                                               |
| 268 | O1OC(OC)CCC1CO                                                                                                                                                                                        |
| 269 | S(=O)(Nc1cccc1)c1cccc1OC                                                                                                                                                                              |
| 270 | [n+]1(c2c(ccc3c2nccc3)ccc1)C                                                                                                                                                                          |
| 271 | S(c1cc(C#N)c(N)cc1)c1cc(C#N)c(N)cc1                                                                                                                                                                   |
| 272 | O=C1N(N2C(=NNC2=O)c2cccc2)C(=O)C=C1                                                                                                                                                                   |
| 273 | S(=O)([O-])(=Nc1cc(OC)ccc1OC)c1cc2c(N=CN(NC(=O)C)Nc3cc(OC)ccc3OC)C2=O)cc1                                                                                                                             |
| 274 | O1[C@@H]2[C@H](ON3O[C@H]([C@@H](C23)C1=O)C(OCC)=O)OC1CCCC1(c1cccc1)c1cccc1                                                                                                                            |
| 275 | Oc1ccc(cc1)CC(NC(=O)C(NC(=O)C)CO)C(=O)NCC(=O)N                                                                                                                                                        |
| 276 | Brc1c(-c2cc(OC)c(OC)cc2)c(Br)[nH]c1C(OCC)=O                                                                                                                                                           |
| 277 | O=C1c2c(CCCC1=Cc1cccc1)cccc2                                                                                                                                                                          |
| 278 | O=C1N(C)C(=O)N([N-]1)c1c(cc(cc1)C)C                                                                                                                                                                   |
| 279 | O1CCOC12C1CCC(C)(C2OCC(C)C)C1(C)C                                                                                                                                                                     |
| 280 | O(C)c1cc(ccc1OC)C(=Cc1cc(OC)c(OC)cc1)C(OCC=C)=O                                                                                                                                                       |
| 281 | O1[C@@H]2[C@@H](O[C@H](C2)[C@@]2(OCC[C@H](C)[C@@H]2O)O)C=CC(=C[C@H](C)[C@@]2(O[C@H]([C@]34O[C@](CC3)(C)[C@H](O4)[C@@H]3O[C@](CC3=O)(C)[C@@H](O)[C@@H]3O[C@@]4(O[C@H](CCC4)[C@H](C)C1=O)CC3)CO)CC2)C)C |
| 282 | O=C1c2c3c(cccc3cc3c2cccc3)C1=NNC(=O)c1ccc(cc1)C                                                                                                                                                       |
| 283 | S(C(=O)CCCC[n+]1cccc1)c1cccc1C(=O)Nc1ccc(S(=O)([O-])=Nc2oc(C)c(n2)C)cc1                                                                                                                               |
| 284 | O=C1n2c(nc3cc(ccc23)Cc2cc3nc-4n(c3cc2)C(=O)c2c3c(ccc2)c(N)ccc3-4)-c2c3c1cccc3c(N)cc2                                                                                                                  |
| 285 | OC=1N(CC(OCC)=O)[CH-                                                                                                                                                                                  |



|     |                                                                                                                                                    |
|-----|----------------------------------------------------------------------------------------------------------------------------------------------------|
|     | ]C(=O)C=1C1=CC(=O)N(C1)CC(OCC)=O                                                                                                                   |
| 286 | O1C2c3e(OCC2(O)C2cc(OC)ccc12)cc(OC)cc3                                                                                                             |
| 287 | O(C)c1e2e(cc(c1)C)c(cc(-<br>c1cc(c3c(c1O)c(OC)cc(c3)C)-<br>c1c3c([C@H]([NH+](C)[C@H](C3)C)C)c(O)cc1O)c<br>2O)-c1c2c(C([NH2+][C@@H](C2)C)C)c(O)cc1O |
| 288 | O(C(=O)C1N(CCC1)C(=O)C(NC(OC(C)C)C)=O)CC(<br>C)C)Cc1cccc1                                                                                          |
| 289 | S(C1OC(COC(=O)C)C(OC(=O)C)C(OC(=O)C)C1OC(<br>=O)C)C1=NC(=Cc2ccc(cc2)C)C(=O)N1CC=C                                                                  |
| 290 | Clc1cc2c(NC(=C(C(OC)=O)C2=O)c2cccc2)cc1                                                                                                            |
| 291 | O1CC[NH+](CC1)C1CCCC2c3c(cccc3)[C@]12O                                                                                                             |
| 292 | O(C(=O)C)C=1C(=O)C2(C(CCC(C)C(OC(=O)C)CCC(<br>=CCCC(=CC2)C)C)C=1C(COC(=O)C)C)C                                                                     |
| 293 | Clc1ccc(Nc2sc(C(=O)c3occc3)c(n2)N)cc1                                                                                                              |
| 294 | Clc1ccc(NC=2n3c(nc4cc(C)c(cc34)C)C(C#N)=C(C=2)<br>c2cccc2)cc1                                                                                      |
| 295 | Clc1ccc(cc1)CNC(=O)c1cc2secc2nc1C(F)(F)F                                                                                                           |
| 296 | O1c2cc(OC)c3c(O[C@H](C)[C@H](C)C3=O)c2C=<br>CC1(C)C                                                                                                |
| 297 | OC=1N(c2c(cccc2)C(=O)C=1C(=O)NCCC[NH+](C)C)<br>C                                                                                                   |
| 298 | S(=O)(=O)(N(CC=C)c1cc(OC)c2[nH]cc(c2c1[N+](=O)<br>[O-])C)C                                                                                         |
| 299 | O=C1NC(=O)NC(NN(C)C)=C1                                                                                                                            |
| 300 | s1ccc(C)c1C=NNc1sc2e(n1)cccc2                                                                                                                      |
| 301 | O(CC[NH+](C)C)c1ccc(cc1)-<br>c1n2c(C=CC=C2)c(C(=O)C)c1-c1cccc1                                                                                     |
| 302 | O1c2e(OCC1C[NH+]1CCC3(N(CN(C(C)C)C3=O)c3<br>cccc3)CC1)cccc2                                                                                        |
| 303 | S(=O)([O-<br>])(=Nc1noc(c1)C)c1ccc(Nc2c3c([nH+]+c4c2cccc4)c(ccc<br>3)C(=O)Nc2ccc(NC(=O)C)cc2)cc1                                                   |
| 304 | Oc1ccc(cc1)C=CC(C=C)(C)C                                                                                                                           |
| 305 | O1c2e(cccc2)C(=C(Oc2cccc2)C1=O)c1ccc(O)cc1                                                                                                         |
| 306 | O1c2e(C(=O)[C@H](C)C1C)c(O)cc1OC(CCc12)(C)C                                                                                                        |
| 307 | S1(OCCOS(=O)(=O)C1CN1C(=O)c2c(cccc2)C1=O)(=O)=O                                                                                                    |
| 308 | O1C[C@H](NC1=O)COc1ccc(cc1)C=O                                                                                                                     |
| 309 | S1C=2N(N=C1N)C(=O)c1c(N=2)cccc1                                                                                                                    |
| 310 | S1CC2OC(n3c4ncnc(N)c4nc3)C(O)C2(O)CC1                                                                                                              |
| 311 | Br1cnc(Oc2ccc([N-<br>]C(=O)NC(=O)c3cccc3NC(=O)C[NH3+])cc2C)nc1                                                                                     |
| 312 | O=C1N=C(NC(=C1)C)NNC(C#N)c1ccc(N(C)C)cc1                                                                                                           |
| 313 | S1C(c2c([NH+]=C1N)n(nc2C)C(=O)Cc1cccc1)c1cc(<br>OC)ccc1                                                                                            |
| 314 | O=C(Nc1cc2c(cc1)cccc2)Nn1cnnc1                                                                                                                     |
| 315 | O=C1N=C(Nc2nc[nH]c12)Nc1cc(CO)c(cc1)C                                                                                                              |
| 316 | O=C1N(Cc2nnc(c2)COCCOC(=O)C)C(=O)N(C=C1C)<br>C(=CC(OC)=O)C(OC)=O                                                                                   |
| 317 | Clc1cc(NC=2OCCN=2)c(OC)cc1OC                                                                                                                       |
| 318 | O=C1N2[C@H](Cc3c([nH]c4c3cccc4)C2CC(C)C(<br>=O)NC1COC(C)C)C                                                                                        |
| 319 | O1c2e(cc3OCOC3c2)C(C)C1[NH+](CC)CC)c1cccc(<br>OC)c1OC                                                                                              |
| 320 | s1nc(N2CCCC2)c(C(OC)=O)c1Nc1cccc1                                                                                                                  |
| 321 | s1cc(c2c1cccc2)CC[NH+]1CCC2(N(CN(C)C2=O)c2cc<br>ccc2)CC1                                                                                           |
| 322 | O1C(CO)C(O)C(O)C1OC1C(O)C(O)C(OC1O[C<br>@H]1CC[C@]2([C@H](CC[C@]3([C@H]2CC                                                                         |

|     |                                                                                                           |
|-----|-----------------------------------------------------------------------------------------------------------|
|     | =C2[C@@H]4CC(CC[C@@]4(CC[C@]23C)C(=O)[O<br>-])(C)C)C1(C)C)CO                                              |
| 323 | Oc1ccc(O)cc1C=Cc1ccc(cc1)C(OC)=O                                                                          |
| 324 | O1c2c(ccc(O)c2)C(=O)/C1=N/c1cccc1                                                                         |
| 325 | S=C1N(C(=O)C(=O)N1C1CCCC1)C1CCCC1                                                                         |
| 326 | O(C)c1ccc(N2C(=O)C(CC2=O)C2CC(CCC2=O)C(C)(<br>C)C)cc1                                                     |
| 327 | O1c2c(C(=CC1=O)C)c(OC)cc(OC)c2                                                                            |
| 328 | OC12C(CCCCC1O)[C@]1(OC(=O)C)C2CCCC1                                                                       |
| 329 | O=C1N2N(CCCCC2)C=C1                                                                                       |
| 330 | O(C)c1cc2c3NCCN(c4c3c(nc2c1)c([N+](=O)[O-]<br>])cc4)CC[NH+](C)C                                           |
| 331 | Br1cc(cc(Br)c1N)-c1sc2c(n1)cccc2                                                                          |
| 332 | O=C(NC1CCCC1)c1ccc(N(Cc2nc3c(nc(nc3N)N)nc2)<br>C)cc1                                                      |
| 333 | O(CC(N=C)c1cccn1)=NNC(=O)c1ccncc1)c1ccc(OC)<br>cc1                                                        |
| 334 | [Si](O[C@H]([C@@H](NC(=O)c1cccc1)c1cccc1)C(<br>OC(c1ccc(OC)cc1)c1ccc(OC)cc1)=O)(C(C)(C)C)C                |
| 335 | O=C1C=C2C=C(NC=C2C=C1[O-])C(OC)=O                                                                         |
| 336 | Oc1cc(ccc1O)C=C(C(=O)NCCCCCCCCNC(=O)C(=C<br>c1cc(O)c(O)cc1)C#N)C#N                                        |
| 337 | s1c2c(cc1C1(NC(=O)C)CCCCC1)cccc2                                                                          |
| 338 | O(C(=O)C(=CC(OC)=O)c1c2-<br>c(cc(ccc2C)C(C)C)c(c1)C)C                                                     |
| 339 | OC1(C2C(C(C1)c1cccc1)C(=O)c1c(NC2=O)cccc1)c1<br>cccc1                                                     |
| 340 | Oc1ccc(O)cc1CC=C(CCC=C(CCC=C(CCC=C(CCC=C<br>C(CCC=C(CCC=C(CCC=C(C(C)C)C)C)C)C)C)C)C                       |
| 341 | Clc1ccc(cc1)C=1N=C(c2n(C=1)c1c(n2)cccc1)C=Cc1sc<br>cc1                                                    |
| 342 | S=C1N(CCC1c1c(c[nH]c1c1[O-]<br>])=C[N+]#N)C(OC)=O)CC                                                      |
| 343 | S(=O)(=O)(N(N=CC(OC(=O)C)C(OC(=O)C)C(OC(=O)<br>)C)C(OC(=O)C)COC(=O)C)C(=O)C)c1ccc(cc1)C=C1<br>NC(=O)NC1=O |
| 344 | Fc1ccc(cc1)C1(OC(=O)c2c1cccc2)c1ccc(cc1O)C                                                                |
| 345 | S(=O)([C@H]([C@H](Nc1ccc(OC)cc1)C(F)(F)F)c<br>1cccc1)c1ccc(cc1)C                                          |
| 346 | O=C1C(=O)N(C(=O)[C-]1C(=O)C)c1cccc(C)c1C                                                                  |
| 347 | P1(OC(CN1C(C)(C)C)C)C(=O)C(CC)C=O                                                                         |
| 348 | O=C1CCC2(CC1C(OC)=O)Cc1c(cccc1)C2=O                                                                       |
| 349 | [nH]1cc(c2c1cccc2)-c1ncc(nc1)-c1c2c([nH]c1)cccc2                                                          |
| 350 | S1C=2N(N=C1Sc1cccc1)C(=O)C=C(N=2)C                                                                        |
| 351 | S1C23C(CC14N(CCc1c4[nH]c4c1cccc4)C2=O)CCCC<br>3                                                           |
| 352 | s1c2[n+](nc1N)c(n2)Cc1cccc1)C                                                                             |
| 353 | O=C1c2cc(ccc2CC1Cc1cccc1C(=O)[O-])C                                                                       |
| 354 | C1C=1C=CC2=NC3=NC(=O)NC(=C3C(NCC[NH2+])C<br>CO)=C2C=1)C                                                   |
| 355 | Oc1ccc(cc1)C[C@H](N=C1[C@H]2C[C@]([N+](<br>=O)[O-])(C)[C@]1(O)CCC2)C(OC)=O                                |
| 356 | O=C1N=C(N)C=CN1COCCOCc1cc(ccc1)C)C                                                                        |
| 357 | O=C1NC(=O)NC(N=Nc2cc(C)c(cc2)C)=C1                                                                        |
| 358 | O=C(N(CCn1c(nc1[N+](=O)[O-]<br>])C)C)CCn1ccnc1[N+](=O)[O-]                                                |
| 359 | O=C1N(c2cccc(C)c2)C(=O)C2C1C1CC(CCC1c1c2[n<br>H]c2c1cccc2)C(C)C                                           |
| 360 | S1C2N(c3c(C2=NN(C)C1=N)cccc3)C(=O)C                                                                       |
| 361 | s1ccc(c1-c1sccc1)-c1sccc1                                                                                 |

|     |                                                                                                                                       |
|-----|---------------------------------------------------------------------------------------------------------------------------------------|
| 362 | <chem>O=C1C=C2NC(=O)C(=CC=C[C@@H](OC)[C@H](OC(=O)N)C(=C[C@@H](C)[C@@H](OC(=O)CC[NH+](C)C)[C@H](OC)C[C@@H](CC(=C1NCC=C)C2=O)C)C</chem> |
| 363 | <chem>O=C1c2c(CC1=Cc1cccc1C(OC)=O)c1CCCc1cc2</chem>                                                                                   |
| 364 | <chem>[I+](C=1C(=O)NC(=NC=1[O-])N)c1cccc1</chem>                                                                                      |
| 365 | <chem>OC1(N=C(c2c(-n3c1ccc3)cccc2)c1cccc1)CC</chem>                                                                                   |
| 366 | <chem>O=C(N)C=1NC(N=C2N(C=NC=12)Cc1cccc1)(C)C</chem>                                                                                  |
| 367 | <chem>O=C1CCC(N(C(=O)c2cccc2)CCCC)c2c1[nH]c1c2ccc1</chem>                                                                             |
| 368 | <chem>[n+]1(c2c(ccc2)c(N(C)C)cc1C)CCCCCCCC[n+]1c2c(ccc2)c(N(C)C)cc1C</chem>                                                           |
| 369 | <chem>Fc1ccc(cc1)C(CC1OCCO1)C[NH+]1CCC2(N(C)C(=O)N(C)C2=O)CC1</chem>                                                                  |
| 370 | <chem>Clc1cccc1C1=COC2c(ccc(F)c2)C1=O</chem>                                                                                          |
| 371 | <chem>Clc1cc2N=C(N(C(=O)c2cc1)c1scc(n1)C)C</chem>                                                                                     |
| 372 | <chem>O(CC)c1ccc(N\C=C/(C#N)\c2[nH]c3c(n2)cccc3)cc1</chem>                                                                            |
| 373 | <chem>Clc1c(ccc1Cl)\C=C/(C(=S)N)\C#N</chem>                                                                                           |
| 374 | <chem>s1c2c(nc1NC(=O)\C=C\c1c3c(cc1)cccc3)cccc2</chem>                                                                                |
| 375 | <chem>O=C1N(CC(=O)N2c3c(ccc3)[C@@H](CC2(C)C)C(=O)CC1</chem>                                                                           |
| 376 | <chem>O=C1NC(C)=C(C(OCCC(C)C)=O)[C@H](N1)c1ccc(c1)C</chem>                                                                            |
| 377 | <chem>S=C(Nc1cc(F)ccc1)NCc1cccc1</chem>                                                                                               |
| 378 | <chem>Clc1cccc1C=NN1CCN(CC1)c1ccc(cc1)C</chem>                                                                                        |
| 379 | <chem>O=C(N[C@H]1CCCC[C@H]1C)c1ccc([N+](=O)[O-])cc1</chem>                                                                            |
| 380 | <chem>Clc1ccc2c(NC(C)=C(CN3CC[NH+](CC3)C)C2=O)c1C</chem>                                                                              |
| 381 | <chem>S(=O)(=O)(Nc1cccc1C#N)c1cccc1</chem>                                                                                            |
| 382 | <chem>O1CCN(CC1)c1cccc1NC(=O)c1cccc1</chem>                                                                                           |
| 383 | <chem>O=C1NC(C)=C(C(OC(C)C)=O)[C@@H](N1)c1cccc1</chem>                                                                                |
| 384 | <chem>O(C)c1ccc(cc1)C(=O)NCC1=Nc2c3c1cccc3ccc2</chem>                                                                                 |
| 385 | <chem>O=C1N(N(C)C(C)=C1NC(OCc1cccc1)=O)c1cccc1</chem>                                                                                 |
| 386 | <chem>O=C(N)C1CC[NH+](CC1)CCC(=O)Nc1cc2CCCc2cc1</chem>                                                                                |
| 387 | <chem>O1C(=CC(=Cc2cc([N+](=O)[O-])ccc2)C1=O)c1cccc1</chem>                                                                            |
| 388 | <chem>O1c2cc(ccc2OC1)C1[NH2+][CCc2c1cc(OC)c(OC)c2</chem>                                                                              |
| 389 | <chem>Clc1ccc(cc1N)-c1oc2c(n1)cc(cc2)C</chem>                                                                                         |
| 390 | <chem>S(Cc1ccc(cc1)C)c1nnc(n1N)-c1cccc1</chem>                                                                                        |
| 391 | <chem>O1CCN(CC1)C(=O)c1cc2c(cc1O)cccc2</chem>                                                                                         |
| 392 | <chem>O(CCC(C)C)c1ccc(cc1)[C@]1(NC(=O)NC1=O)C</chem>                                                                                  |
| 393 | <chem>Br1cc(OCC(Oc2cccc2C)=O)ccc1</chem>                                                                                              |
| 394 | <chem>s1cccc1S(=O)(=O)N1c2c(CCC1)cccc2O</chem>                                                                                        |
| 395 | <chem>S1c2c(N(CCO)/C/I=C\c1[n+](cccc1)C)cccc2</chem>                                                                                  |
| 396 | <chem>s1c2N(CN(Cc2c(C)c1C)CC=C)C(=O)c1cccc1</chem>                                                                                    |
| 397 | <chem>S1CC(=O)Nc2ccc(ccc12)C(=O)N1CCOCC1</chem>                                                                                       |
| 398 | <chem>Clc1ccc([N+](=O)[O-])cc1N1C(=O)[C@H]2[C@H]([C@H]3O[C@@H]2C=C3)C1=O</chem>                                                       |
| 399 | <chem>O1CC[C@@](CC1(C)C)(Cc1cccc1)CCN1C(=O)CCC1=O</chem>                                                                              |
| 400 | <chem>O=C(Nc1cccc1)c1ccc(cc1)C</chem>                                                                                                 |
| 401 | <chem>S(=O)(=O)(NCc1ccc(cc1)C)c1cc(OC)c(OC)cc1</chem>                                                                                 |
| 402 | <chem>S(Cc1ccc(cc1)C(OC)=O)c1nnc1C</chem>                                                                                             |
| 403 | <chem>O1CCC[C@H]1COC(=O)[C@@H]1CC=CC[C@H]1C(=O)Nc1cccc1</chem>                                                                        |
| 404 | <chem>O(C)c1cc(N2C(=O)CN=C2Nc2nc(cc(n2)C)C)ccc1OC</chem>                                                                              |
| 405 | <chem>O=C1N2C(=Nc3c1cccc3)[C@H](c1c(C2)cccc1)Cc1cccc1</chem>                                                                          |
| 406 | <chem>O=C(C)c1cc(NC(=O)\C=C\c2ccc(cc2)C(C)C)\C#N)cc</chem>                                                                            |

|     |                                                                     |
|-----|---------------------------------------------------------------------|
|     | <chem>c1</chem>                                                     |
| 407 | <chem>O=C1NCCCC[C@@H]1C(=O)NC[C@H](O)CO</chem>                      |
| 408 | <chem>O1c2n[nH]c(c2[C@H](C(C#N)=C1N)c1ccc(OC(C)C)c1)C</chem>        |
| 409 | <chem>O([C@H](C(=O)NN=C1CC[NH+](CC1)C)c1cccc1)C</chem>              |
| 410 | <chem>S=C(NC(=O)c1occc1)[N-]c1ccc(N(C)C)cc1</chem>                  |
| 411 | <chem>O(C[C@@H]1CCC=CC1)C[C@H](O)Cn1c2c(nc1CC)cccc2</chem>          |
| 412 | <chem>Br1ccc(cc1)[C@H]1SC[C@@H](N1)C(=O)[O-]</chem>                 |
| 413 | <chem>Clc1ccc(cc1)CSc1nc2c(cc1)cccc2</chem>                         |
| 414 | <chem>O(c1cccc1C=CC(=O)[O-])c1cccc1</chem>                          |
| 415 | <chem>O(CC)C(=O)Nc1cccc1C(=O)N1CCCCC1</chem>                        |
| 416 | <chem>O=C(NC1CCCCC1)N1c2c(cc(cc2)C)[C@H](CC1(C)C)C</chem>           |
| 417 | <chem>O(C)c1cccc1C=CC(=O)Nc1cc(cc(c1)C)C</chem>                     |
| 418 | <chem>O(C(=C(C#N)C#N)c1cccc1)C</chem>                               |
| 419 | <chem>O=C1c2c(ccc2)C(=O)C1=C(Nc1cccc1C)C#N</chem>                   |
| 420 | <chem>o1c2c(nc1-c1cc(N)ccc1)cc(cc2)CC</chem>                        |
| 421 | <chem>O=C(N[C@H](C(=O)N)C#N)C</chem>                                |
| 422 | <chem>o1cccc1C(O[C@H]1CCC[NH+](C1)C)=O</chem>                       |
| 423 | <chem>O(C)c1cccc1C(=O)NC1CC([NH2+][C(C1)(C)C)C</chem>               |
| 424 | <chem>O=C1NC(C(C(OC)=O)=C(N1)C)c1cc([N+](=O)[O-])c([O-])cc1</chem>  |
| 425 | <chem>[nH+]1c2c(n(CC[NH+](C)C)c1N)cccc2</chem>                      |
| 426 | <chem>ON=Cc1c(n(nc1C)-c1cccc1)C</chem>                              |
| 427 | <chem>O(C)c1cccc1Nc1c2cc(ccc2ncc1C(OCC)=O)C</chem>                  |
| 428 | <chem>s1ccnc1NC(=O)c1cc(OC)cc(OC)c1</chem>                          |
| 429 | <chem>Clc1cccc(Cl)c1C=CC(=O)N(C)C1CCCCC1</chem>                     |
| 430 | <chem>s1c(N=CC2C(=O)CCCC2=O)c(cc1C)C(OCC)=O</chem>                  |
| 431 | <chem>O=C1N2N=C(n3nc(cc3)C)c3c(C2=Nc2c1cccc2)cccc3</chem>           |
| 432 | <chem>O1[C@@]2(O)c3c(ccc3)C(=O)[C@]2(O)C(C(OCC)=O)=C1C</chem>       |
| 433 | <chem>O(C)c1cc(ccc1OC)C=NNC(=O)c1n[nH]c2c1CCCC2</chem>              |
| 434 | <chem>S=C1NC(=O)/C(N1)=C\c1cccc1OC</chem>                           |
| 435 | <chem>o1c(ccc1COc1cc2c(cc1)cccc2)C(=O)NN</chem>                     |
| 436 | <chem>s1cccc1[C@](O)(C(=O)NNc1ccc(cc1)C)c1cccc1</chem>              |
| 437 | <chem>Fc1cc(ccc1)C=1OC(=O)/C(N=1)=C\c1c2c(ccc1)cccc2</chem>         |
| 438 | <chem>O(C)c1cc(ccc1OC)C(=O)CC(=O)c1cccc1O</chem>                    |
| 439 | <chem>Br1ccc(cc1)C(=O)CSc1nc([nH]n1)CC</chem>                       |
| 440 | <chem>O1c2c(C=C(C(=O)Nc3cccc3OC)C1=O)cc(OC)cc2</chem>               |
| 441 | <chem>Br1cc(C)c(OC(=O)c2cc(OC)ccc2)c(c1)C</chem>                    |
| 442 | <chem>S(=O)(=O)(N)c1cc2[C@@H]3[C@H](CC=C3)[C@H](Nc2cc1)C(C)C</chem> |
| 443 | <chem>s1c2c(CC[C@@H](C2)C)c(C(OC)=O)c1NC(=O)COC</chem>              |
| 444 | <chem>s1cccc1-c1[nH]nc2OC(N)=C(C#N)[C@@H](c12)c1cccc1F</chem>       |
| 445 | <chem>O=C(NN=CC(C)C)c1ccc(N(C)C)cc1</chem>                          |
| 446 | <chem>O(C)c1cc2c(cc1OC)CCN(C(=O)c1cccc1)[C@H]2C</chem>              |
| 447 | <chem>O(CC(=O)c1ccc(O)cc1O)c1cc2c(cc1)cccc2</chem>                  |
| 448 | <chem>S(=O)(=O)(N)c1ccc(cc1)CCNC(=S)Nc1cccc1</chem>                 |
| 449 | <chem>S(C)C=1NC(=O)[C@@H](C(OC)=O)[C@H](C=1C#N)c1cccc1C</chem>      |
| 450 | <chem>FC(F)(F)COc1ccc(OCC(F)(F)F)cc1</chem>                         |
| 451 | <chem>O1c2c(ccc(OC(C(=O)NC3CCCCC3)C)c2)C(=CC1=O)C</chem>            |
| 452 | <chem>s1c2cc(ccc2nc1NC(=O)c1occc1)C</chem>                          |
| 453 | <chem>Br1ccc(N2C(=O)[C@H](NCc3occc3)CC2=O)cc1</chem>                |
| 454 | <chem>S=C1NC(=O)C(OC2=NNC(=O)C=C2)=C(N1)C</chem>                    |
| 455 | <chem>Fc1ccc(NC(=O)[C@@H](Oc2cccc2)CC)cc1[N+](=O)</chem>            |

|     |                                                    |
|-----|----------------------------------------------------|
|     | [O-]                                               |
| 456 | Br1cc2c(ncnc2N[C@H](C(C)C)C(=O)[O-])cc1            |
| 457 | Br1c(nc(nc1OC)N(C(=O)C)CC=C)C                      |
| 458 | S=C(Nc1cc(ccc1)C(OC)=O)NNC                         |
| 459 | Fc1cc(NC(=O)c2ncnc2)ccc1                           |
| 460 | N1c2c(N[C@@H](CC(C)=C)[C@@H]1CC(C)=C)cccc2         |
| 461 | O=C(Nc1ccc(cc1)CCC)\C=C\C(=O)[O-]                  |
| 462 | O=C([O-])/C=C\C=C\C1c2c([nH]c1)cccc2)/C            |
| 463 | Clc1cc(Cl)ccc1O[C@H](C(=O)NC1CCCC1)C               |
| 464 | O(C)c1cc(ccc1OC)C=NN1CCN(CC1)c1ccc1                |
| 465 | O1C=C\C(=N/c2ccc(cc2)C)\c2cc(ccc12)C               |
| 466 | O=C1NC(=O)N(c2nc(n(c12)CCC(C)C)N(C)C)C             |
| 467 | O(C)c1cc(ccc1OC)C(=O)NNC=1CC(CC(=O)C=1)(C)C        |
| 468 | o1c2c(nc1-c1ccc(N)cc1)cc(cc2)CC                    |
| 469 | O(C(=O)CN1C(=O)c2c(cccc2)C1=O)c1cccc1OC            |
| 470 | O(C)c1ccc(cc1C)C[NH2+]C1C2CC3CC1CC(C2)C3           |
| 471 | S=C1N[C@H](C=2CCc3c(cc(OC)cc3)C=2N1)c1ccc(F)cc1    |
| 472 | Clc1c(cc(OCC(=O)Nc2sc(nn2)C)cc1C)C                 |
| 473 | Clc1cccc1[C@H]1NC(=O)Cc2cc(OC)c(OC)cc12            |
| 474 | O(C)c1cc(OC)ccc1\C=NCC1(CCCC1)c1cccc1              |
| 475 | O=C(N)c1n(ccc1N=C\C1ccc([N+](=O)[O-])cc1)C         |
| 476 | S(=O)(=O)(N)c1ccc(NC(=O)C=C(C)C)cc1                |
| 477 | Fc1cccc1CC(NC(=O)C)C(=O)[O-]                       |
| 478 | O(C)c1ccc(Nc2cc([nH+]c3c2cc(cc3)C(OC)=O)C)cc1      |
| 479 | [NH+]1(CCN(N=Cc2ccc(cc2)C)CC1)Cc1cccc1             |
| 480 | O(CC(=O)NC(C)c1cccc1)c1cc(C)c(cc1)C(C)C            |
| 481 | O=C(NC1CCCC1)N1c2c(cc(cc2)C)[C@@H](CC1(C)C)C       |
| 482 | Clc1ccc(cc1)C(=O)Nc1cc2nc(oc2cc1)-c1cccc1          |
| 483 | O=C1N=C(NC(=C1)C)NCC[NH+](C)C                      |
| 484 | S(=O)(=O)(CC)c1cc(O)c(NC(=O)c2cccc2)cc1            |
| 485 | Clc1cc(NC(=O)COc2cccc2C(C)(C)C)ccc1OC              |
| 486 | O1c2c(C=C(C)Oc3cccc3OCC)=O)C1=O)cccc2              |
| 487 | S(=O)(=O)(Nc1ccc(cc1)C(OC)=O)\C=C\C1cccc1          |
| 488 | O=C1C[C@@]2(CC[C@@]1(C)C2(C)C)C(=O)NCC             |
| 489 | O(CC(=O)Nc1ccc(OC(C)C)cc1)c1cccc1[N+](=O)[O-]      |
| 490 | Clc1ccc(cc1)C(=NNC(=O)COc1ccc(cc1)C)C              |
| 491 | FC(F)(F)c1nc2c(n1CC(OCC)=O)cccc2                   |
| 492 | FC1=CN(CCC(=O)[O-])C(=O)NC1=O                      |
| 493 | S(CC(=O)Nc1c2c(ccc1)cccc2)c1n2c(nn1)C=CC=C2        |
| 494 | S=C(Nc1cc(cc(c1)C)C)N                              |
| 495 | Clc1cccc1[C@H]1NC(=O)N(C)C(C)=C1C(OCC)=O           |
| 496 | S(=O)(CCC(=O)[O-])c1cccc1C(=O)[O-]                 |
| 497 | Clc1ccc(N2CC[NH+](CC2)C2C3CC4CC2CC(C3)C4)c1        |
| 498 | O(C)c1cc(OC)ccc1CN1CCN(CC1)C(=O)c1ccc1             |
| 499 | Clc1cc(NS(=O)(=O)c2cccc2C)cc(Cl)c1[O-]             |
| 500 | Clc1cc2sc(nc2cc1)NN                                |
| 501 | Clc1cc2nccc(OC(=O)N3CCOCC3)c2cc1                   |
| 502 | Fc1cc(ccc1)CC[NH2+][C@@H]1CC(=O)N(C1=O)c1ccc(cc1)C |
| 503 | S=C1NC(=O)/C(N1)=C\C1ccc(cc1)CC                    |
| 504 | Br1ccc(cc1)-c1oc(SC)nn1                            |
| 505 | S(CC(=O)c1ccc([N+](=O)[O-])cc1)c1oc(nn1)-c1ccc1    |
| 506 | Clc1cc(ccc1Cl)-c1nc(sc1)NC(=O)C1CC1                |
| 507 | C1C(=CCSc1nc2N(C)C(=O)NC(=O)c2n1C)C                |

|     |                                                                |
|-----|----------------------------------------------------------------|
| 508 | O1C[C@H]1CN1C(=O)c2c(cc3c(c2)C(=O)N(C[C@H]2OC2)C3=O)C1=O       |
| 509 | S1c2e(N=C(C[C@H]1c1ccc(OC)cc1)c1cccc1)cccc2                    |
| 510 | S=C1NN=C(N1N=C(C)c1ccc(F)cc1)CC                                |
| 511 | O=C1NC(C)=C(C(=O)C)C([C@H]1C#N)c1cc([N+](=O)[O-])ccc1          |
| 512 | O(CC(=O)Nc1cc(O)ccc1)c1ccc(cc1)C                               |
| 513 | O=C(NC1(CCCC1)CCC)c1cccc1                                      |
| 514 | O=C1NC(=O)N(c2nc(n(c12)CCC(C)C)N1CC[NH2+]C1)C                  |
| 515 | Fc1cc2cc([nH]c2cc1)C(=O)N                                      |
| 516 | S(C)C=1NC(=O)[C@H](C(OC)=O)[C@@H](C=1C#N)c1cccc1OC             |
| 517 | O(C)c1ccc(cc1)C=1C(C#N)=C(n2c(nc3c2cccc3)C=1C#N)N              |
| 518 | o1c2cc(ccc2nc1-c1cc(N)cc(N)c1)C                                |
| 519 | Fc1ccc(cc1)-c1c2C[C@H](CCc2nc(N)c1C#N)C                        |
| 520 | O1C=C\C(=N/c2cccc2)\c2cc(ccc12)C                               |
| 521 | O=C1N(C)C(=NN=C1)NCC[NH+](C)C                                  |
| 522 | Clc1ccc(S(=O)(=O)Nc2cccc2CO)cc1                                |
| 523 | Clc1ccc(cc1)C=NN1C(=O)c2c(cccc2)C1=O                           |
| 524 | [nH]1c2c(cccc2)c(-c2c3c(nc2)cccc3)c1C                          |
| 525 | O(C)c1cccc1-n1nc(N)c1C(OC)=O                                   |
| 526 | Clc1ccc(NC(=O)CCC(=O)Nc2ccc(Cl)cc2)cc1                         |
| 527 | [nH]1nc(C)c(-c2c(n[nH]c2)C)c1C                                 |
| 528 | Clc1cc(ccc1)C=NNC(=O)c1nc2n(n1)C(=CC(=N2)C)C                   |
| 529 | O=C(NN=C(C)c1cc(N)ccc1)c1cc([N+](=O)[O-])ccc1                  |
| 530 | S=C(NC(=O)c1cccc1)[N-]c1cccc1C(=O)N                            |
| 531 | Br1cc(ccc1OC)C[NH2+]Cc1cccc1OC                                 |
| 532 | Clc1cc(NC(=O)c2nsc2)c(OC)cc1OC                                 |
| 533 | Clc1cccc1NCN1C(=O)[C@H]2[C@@H](CC=CC2)C1=O                     |
| 534 | Clc1cccc1-c1nnc(SCc2cccc2F)n1N                                 |
| 535 | s1c2C[C@@H](CCc2c2c1N=CN(CC(=O)N(CC)CC)C2=O)C                  |
| 536 | Clc1cc(NC(=O)\C(=C\C2oc(cc2)C)\C#N)ccc1                        |
| 537 | Clc1cc(cc(Cl)c1)C(=O)Nc1sc2c(n1)c(ccc2)C                       |
| 538 | O(C(=O)c1nc(NC[C@@H](O)C)c2c(n1)cccc2)CC                       |
| 539 | o1c(ccc1C)[C@H]1NC(=O)NC(C)=C1C(OC(C)C)=O                      |
| 540 | Clc1ccc(S(=O)(=O)Nc2cc(ccc2)CC)cc1                             |
| 541 | s1c(C(OCC)=O)c(nc1NC(=O)C=Cc1occc1)C                           |
| 542 | O(CC)c1ccc(N2C(=O)[C@H]3[C@H]([C@@H]4C=C[C@H]3C4)C2=O)cc1      |
| 543 | s1cc(c2c1N=CN([C@@H](C(=O)[O-])C)C2=O)-c1cccc1                 |
| 544 | s1c2N=CNC(=O)c2c(C)c1C(OCc1cccc1)=O                            |
| 545 | Clc1cc(Cl)ccc1OCC(=O)Nc1nn(nn1)CC                              |
| 546 | Clc1cc(-c2onc(n2)-c2cccc2C)c(OC)cc1                            |
| 547 | s1c(nnc1Nc1ccc(cc1)C(=O)C)-c1ccc1                              |
| 548 | O(C)c1cccc1NCC(=O)NN=C1CCCC1                                   |
| 549 | Fc1cc2c(N(C=C(C(=O)[O-])C2=O)C2CC2)c(OC)c1N1C[C@H]([NH2+]CC1)C |
| 550 | O(C)c1cc(OC)c(O)cc1C=C[N+](=O)[O-]                             |
| 551 | S=C(NC(=O)c1c(OC)cccc1OC)[N-]c1cccc1                           |
| 552 | Fc1cc(F)ccc1NC(=O)NCc1ccc1                                     |
| 553 | S=C(NC(=O)CCC)[N-]c1ccc(cc1)-c1oc2ccnc2n1                      |
| 554 | O(C(=O)/C(=C/c1c2c(n(c1)C)cccc2)/C#N)C                         |
| 555 | Clc1cc(ccc1Cl)C(=O)Nc1c2c(nc2)ccc1                             |
| 556 | O=C1Nc2c(N[C@H]1CC(=O)Nc1c3c(ccc1)cccc3)cccc2                  |

|     |                                                                             |
|-----|-----------------------------------------------------------------------------|
| 557 | <chem>S(=O)(=O)(Nc1ccc(cc1)C(=O)Nc1cccc1C)C</chem>                          |
| 558 | <chem>Clc1cc(Cl)ccc1COc1ccc(cc1)C(=O)CC</chem>                              |
| 559 | <chem>Brc1ccc(SCC(=O)N2CCC(CC2)C)cc1</chem>                                 |
| 560 | <chem>O(C(C)C)c1cccc1C=NNC(=O)c1cc(NC(=O)C)ccc1</chem>                      |
| 561 | <chem>O(C)c1ccc(OC)cc1C=NNC(=O)c1cc(NC(=O)C)ccc1</chem>                     |
| 562 | <chem>Clc1cccc(NC(=S)Nc2ccc(N(CC)CC)cc2)c1C</chem>                          |
| 563 | <chem>S=C(Nc1cc(ccc1)C(=O)C)N(Cc1en(nc1C)CC)C</chem>                        |
| 564 | <chem>o1c(ccc1C)C=C(C#N)c1ccc(cc1)C</chem>                                  |
| 565 | <chem>O=C(Nc1cc(ccc1C)C)C=Cc1ccc(cc1)C</chem>                               |
| 566 | <chem>o1cccc1C(=O)Nc1cc(NC(=O)CCC)c(OC)cc1</chem>                           |
| 567 | <chem>S(Cc1ccc(cc1)C(=O)NC1CCCC1)c1ccc(cc1)C</chem>                         |
| 568 | <chem>Clc1c2nc(sc2cc1)NC(=O)c1oc2c(c1)cccc2</chem>                          |
| 569 | <chem>Clc1cccc1-c1oc(mn1)C</chem>                                           |
| 570 | <chem>s1c(N2C(=O)[C@H]3[C@H]([C@@H]4C=C[C@H]3C4)C2=O)c(cc1C)C(OCC)=O</chem> |
| 571 | <chem>S(=O)(=O)(Nc1cccc1C(=O)N)c1ccc(cc1)C</chem>                           |
| 572 | <chem>Clc1cccc1OCC(=O)NN=Cc1cccc1OC</chem>                                  |
| 573 | <chem>O1CCN(CC1)c1ccc(NC(=O)CC(C)C)cc1</chem>                               |
| 574 | <chem>O(CC(=O)NC(C)(C)C)c1ccc(cc1)C</chem>                                  |
| 575 | <chem>O1CCC[C@H]1CNe1nc(nc2e1ccc2)Nc1cc(cc1)C)C</chem>                      |
| 576 | <chem>O(C(=O)[C@H](C(=O)Nc1nccn1)C1CCCCC1)C</chem>                          |
| 577 | <chem>O1c2cc(C=C(C#N)c3ccc(cc3)C)c(OC)cc2OC1</chem>                         |
| 578 | <chem>Clc1cc2nc(sc2cc1OC)NC(=O)c1ccc(cc1)CC</chem>                          |
| 579 | <chem>S=C(NC(=O)c1ccc(cc1)C)[N-]c1cccc1</chem>                              |
| 580 | <chem>O=C/1N(c2c(ccc2)C)C=C/c1cc([nH]c1C)C)c1cccc1</chem>                   |
| 581 | <chem>S=C(NC1CC1)NCc1cc(OC)ccc1</chem>                                      |
| 582 | <chem>s1c2N3C(=NNC3=S)N(CC=C)C(=O)c2c(C)c1C</chem>                          |
| 583 | <chem>S(=O)(=O)(N1CCCCC1)c1c2c(ccc1)cccc2</chem>                            |
| 584 | <chem>Fc1cccc1[C@@H]1Nc2c(ccc2)C(=O)N1Cc1occc1</chem>                       |
| 585 | <chem>Clc1cc(ccc1Cl)CN(S(=O)(=O)C)c1cccc1</chem>                            |
| 586 | <chem>O=Cc1c2c(nc1)CC(=O)N1CCc3e(C1)cccc3)cccc2</chem>                      |
| 587 | <chem>s1cccc1C(=O)Nc1cc2nc(oc2cc1)-c1cc(C)c(cc1)C</chem>                    |
| 588 | <chem>Fc1ccc(cc1)CNC(=O)[C@H](Oe1cccc1)CC</chem>                            |
| 589 | <chem>O1CCC[C@H]1[C@H]([C@H](NC(=O)Nc1ccc(cc1)C(O)CC)=O)C</chem>            |
| 590 | <chem>s1c2cc(OC)ccc2nc1NC(=O)c1ccc(cc1)C)C</chem>                           |
| 591 | <chem>S=C(NC(=O)C(C)(C)C)[N-]c1ccc(cc1)-c1oc(cc1)CO</chem>                  |
| 592 | <chem>Fc1cc(NC(=O)Nc2ccc(OCC)cc2)ccc1C</chem>                               |
| 593 | <chem>FC(F)C=1n2ncc(c2N=C(C=1)C)C(=O)Nc1ccc(cc1)C)C</chem>                  |
| 594 | <chem>O(C)c1ccc(cc1)CC(=O)NN=Cc1ccncc1</chem>                               |
| 595 | <chem>o1cccc1C(=O)Nc1c2c(ccc1)C(=O)N(C2=O)c1cccc1</chem>                    |
| 596 | <chem>S(CC(=O)Nc1ccc(F)cc1)c1nc(c2CCCCe2n1)C</chem>                         |
| 597 | <chem>S=C(NC1C2CC3CC1CC(C2)C3)NC(=O)c1cc(OC)ccc1</chem>                     |
| 598 | <chem>O1C([O-])=C(CC=2C(=O)C=C(OC=2O)C)C(=O)C=C1C</chem>                    |
| 599 | <chem>s1c2CCCCe2nc1NC(=O)CSCc1cccc1</chem>                                  |
| 600 | <chem>Clc1ccc(Cl)cc1C(=O)Nc1ccc(cc1)C(=O)N</chem>                           |
| 601 | <chem>Clc1ccc(cc1)C(=O)NNC(=O)c1ccc(OCC(C)C)cc1</chem>                      |
| 602 | <chem>o1cccc1C=C\C(=O)Nc1cc(ccc1OC)C</chem>                                 |
| 603 | <chem>S=C(NC1CCCC1)N[C@H](C)c1cc(OC)c(OC)cc1</chem>                         |
| 604 | <chem>O=C(Nc1cc(NC(=O)CC)ccc1)c1cccc([N+](=O)[O-])c1C</chem>                |
| 605 | <chem>Clc1cc(Cl)ccc1COc1ccc(cc1OCC)C[NH3+]</chem>                           |
| 606 | <chem>Clc1cc(C)c(S(=O)(=O)N2C[C@H](CCC2)C)cc1C</chem>                       |
| 607 | <chem>O(CC(=O)N1CCCC1)c1c2c(ccc1)cccc2</chem>                               |
| 608 | <chem>S(Cc1ccc(cc1)C(C)(C)C)c1mnm1C1CCCCC1</chem>                           |
| 609 | <chem>O=C(NN=Cc1ccc(N(CC)CC)cc1)Cn1cc[nH+]c1C</chem>                        |
| 610 | <chem>O=C(NN=Cc1cc(ccc1)C)c1cccc1C(=O)[O-]</chem>                           |
| 611 | <chem>S(Cc1oc2c(cc(OC)cc2)c1C(OCC)=O)c1cccc1</chem>                         |

|     |                                                                     |
|-----|---------------------------------------------------------------------|
| 612 | <chem>O(C)c1cccc1CNe1nc2c(n1C(C)C)cccc2</chem>                      |
| 613 | <chem>n1cnc2n(ncc2e1NCc1cccc1)-c1cc(ccc1)C</chem>                   |
| 614 | <chem>O=C(NCC(C)C)C=Cc1ccc(cc1)C</chem>                             |
| 615 | <chem>o1c(ccc1COc1ccc(cc1)CCC)C(OC)=O</chem>                        |
| 616 | <chem>O(C)c1ccc(cc1)[C@H](NC(=O)[C@H](C)c1cccc1)C</chem>            |
| 617 | <chem>s1c2c(nc1NC(=O)c1oc([N+](=O)[O-])cc1)c(OC)cc(OC)c2</chem>     |
| 618 | <chem>S(CC(=O)Nc1cccc1C)CC(=O)Nc1ccc(cc1)CC</chem>                  |
| 619 | <chem>Clc1ccc([N-]C(=S)NC(=O)c2cc(ccc2)C)cc1C(=O)[O-]</chem>        |
| 620 | <chem>O=C(CC(=O)Nc1ccc(N(C)C)cc1)C</chem>                           |
| 621 | <chem>O([C@H](CC)C(=O)Nc1cccc1C)c1cccc1</chem>                      |
| 622 | <chem>Clc1cccc1C(=O)Nc1cc(NC(=O)C(C)C)ccc1</chem>                   |
| 623 | <chem>O=C(N)c1cc(N)c(N2CCC(CC2)C)cc1</chem>                         |
| 624 | <chem>s1c2cc(NC(=O)C)ccc2nc1NC(=O)c1ccc(cc1)CC</chem>               |
| 625 | <chem>Clc1cc([N-]C(=S)NC(=O)c2ccc(cc2)C)ccc1</chem>                 |
| 626 | <chem>Clc1cccc(NC(=O)CCC)c1N1CCOCC1</chem>                          |
| 627 | <chem>Clc1cccc(F)c1CC(=O)Nc1cc(Cl)c(Cl)cc1</chem>                   |
| 628 | <chem>o1cccc1CNC(=O)[C@H](C#N)c1cccc1</chem>                        |
| 629 | <chem>o1c(C)c(cc1C)C=C(C#N)C#N</chem>                               |
| 630 | <chem>O=C(NN=Cc1ccc(cc1)C#N)CNe1ccc(cc1)C)C</chem>                  |
| 631 | <chem>o1c(ccc1C)C(=O)C[C@H]1(O)c2c(N(CCC)C1=O)ccc2</chem>           |
| 632 | <chem>Clc1cc(ccc1C(=O)NNC(=O)c1ccncc1)C</chem>                      |
| 633 | <chem>Fc1ccc([N+](=O)[O-])cc1NC(=O)c1ccc(cc1)-c1cccc1</chem>        |
| 634 | <chem>S1C(=Cc2ccncc2)C(=O)N=C1Nc1cccc1C</chem>                      |
| 635 | <chem>Clc1ccc(cc1)C(=O)Nc1ccc(N)cc1OC</chem>                        |
| 636 | <chem>Clc1cc(ccc1Cl)C(OC)c1ccc(cc1)C(OC)=O=O</chem>                 |
| 637 | <chem>s1cccc1S(=O)(=O)NC(=S)NC1CCCCC1</chem>                        |
| 638 | <chem>O=C/1N(c2c(ccc2)C)C=C/c1ccc(N(C)C)cc1)c1cccc1</chem>          |
| 639 | <chem>O(CC(=O)NN=Cc1ccc(cc1)C)c1cc2c(cc1)cccc2</chem>               |
| 640 | <chem>O(CC)C(=O)/C(=C/c1cc2c(cc1)cccc2)/C#N</chem>                  |
| 641 | <chem>S(Cc1cccc1C)CC(=O)[O-]</chem>                                 |
| 642 | <chem>S(=O)(=O)(N1CCC(CC1)C(=O)NN)c1c(cc(cc1)C)C)C</chem>           |
| 643 | <chem>S=C1NC(C(C(=O)C)=C(N1)C)c1cc(OCC)c(O)cc1</chem>               |
| 644 | <chem>O=C(NC(C)c1[nH]c2c(n1)cccc2)C1CC1</chem>                      |
| 645 | <chem>S(C)c1nnc(n1C)COc1c2nc(ccc2cc1)C</chem>                       |
| 646 | <chem>S=C(NCc1cccc1)NCCc1cc(OC)c(OC)cc1</chem>                      |
| 647 | <chem>Clc1cc(Cl)ccc1NC(=O)Nc1nccc(c1)C</chem>                       |
| 648 | <chem>S1c2n(N=C1c1ccc(NC(=O)Cc3cccc3)cc1)c(mn2)C</chem>             |
| 649 | <chem>S(CC(=O)NC1CCCC1)c1nnc(n1C)C1CCCCC1</chem>                    |
| 650 | <chem>Fc1cccc1C(=O)N(CC1=Cc2ccc(ccc2NC1=O)C)CC</chem>               |
| 651 | <chem>O=C1N(C)C(=O)N(c2n(cnc12)CC(=O)Nc1nccc(c1)C)C</chem>          |
| 652 | <chem>S(CC(=O)NC(C)C)c1nnc(n1C1CCCCC1)C</chem>                      |
| 653 | <chem>O(Cc1cccc1)c1ccc(NC(=O)Nc2ccc(OC)cc2)cc1</chem>               |
| 654 | <chem>s1c2c(nc1SCC(=O)N(CC)c1cccc1)cccc2</chem>                     |
| 655 | <chem>Brc1ccc(NC(=O)c2noc(c2)-c2cccc2)cc1</chem>                    |
| 656 | <chem>Brc1cc(NC(=O)CC)ccc1OC</chem>                                 |
| 657 | <chem>o1cccc1C=C\C(=O)Nc1cc(ccc1)C</chem>                           |
| 658 | <chem>Clc1ccc(cc1)C=[N+](=[O-])c1ccc(cc1)C</chem>                   |
| 659 | <chem>S=C(Nc1cc(ccc1)C)NNC(=S)Nc1cccc1</chem>                       |
| 660 | <chem>Fc1cc2c3N([C@H](CCc3c1)C)C(O)=C(C(=O)NCC[NH+](C)C)C2=O</chem> |
| 661 | <chem>O(CC(=O)Nc1cccc(C)c1C)c1c(ccc1)C)C</chem>                     |
| 662 | <chem>Clc1cccc1NC(=O)[C@H](Oe1cc(Cl)ccc1)C</chem>                   |
| 663 | <chem>Fc1ccc(cc1)C=Nc1ccc(cc1)C(=O)[O-]</chem>                      |
| 664 | <chem>O(CC)c1cccc1C=NNC(=O)c1cc(NC(=O)C)ccc1</chem>                 |
| 665 | <chem>O(C)c1cc(OC)c([N+](=O)[O-])cc1C=C(C#N)c1ccc(cc1)C#N</chem>    |
| 666 | <chem>S(=O)(=O)(Nc1cc(O)c(cc1)C(=O)[O-])c1ccc(F)cc1</chem>          |

|     |                                                                 |
|-----|-----------------------------------------------------------------|
| 667 | <chem>O(C)c1cccc1NCC(=O)NN=Cc1cc(OC)c(OC)cc1</chem>             |
| 668 | <chem>O=C(C)c1cc(NC(=O)Nc2cn(nc2C(=O)N)CC)ccc1</chem>           |
| 669 | <chem>Clc1cccc1OCC(=O)NN=Cc1cc(OC)ccc1</chem>                   |
| 670 | <chem>Clc1cc(Cl)ccc1C(=O)Nc1ccc(N)cc1C</chem>                   |
| 671 | <chem>o1c(C)c(cc1C(OC)=O)CC(=O)c1c(O)cc(O)cc1O</chem>           |
| 672 | <chem>s1c2CCCCe2c2c1nc(SC)nc2N1CCCC1</chem>                     |
| 673 | <chem>O(C)c1c(OC)c(OC)ccc1C=CC(=O)N1CCCC1</chem>                |
| 674 | <chem>Clc1cc2NC(=O)/C(/c2cc1)=C/c1cc(n(c1C)-c1cccc1)C</chem>    |
| 675 | <chem>Clc1ccc(OCC(=O)NN=Cc2cc(O)c(OC)cc2)cc1</chem>             |
| 676 | <chem>Clc1cccc1C=CC(=O)N1CCN(CC1)c1cccc1</chem>                 |
| 677 | <chem>Fc1ccc(cc1)COc1cc(ccc1)C[NH2+]C1CCCC1</chem>              |
| 678 | <chem>S(=O)(=O)(n1c2cc(C)c(cc2nc1)C)N1CCOCC1</chem>             |
| 679 | <chem>O=C1N(C)C(=O)N(c2n(cnc12)CC(=O)NC1CCCCC1)C</chem>         |
| 680 | <chem>Clc1cccc(F)c1COc1ccc(NC(=O)C)cc1</chem>                   |
| 681 | <chem>O(CC(=O)NNC(=O)c1n[nH]e(c1)C)c1cc(ccc1)C</chem>           |
| 682 | <chem>n1c2c(n[C@H](CC)C)c1CC)cccc2</chem>                       |
| 683 | <chem>Brc1ccc(cc1)C[NH2+][C](C)C</chem>                         |
| 684 | <chem>Fc1cc(F)ccc1N=C\c1cc(oc1)C</chem>                         |
| 685 | <chem>S(=O)(=O)(N1CCCC1)c1ccc(N=C\c2oc(cc2)C)cc1</chem>         |
| 686 | <chem>s1cccc1CC(=O)NN=Cc1cc(OC)c(OC)cc1</chem>                  |
| 687 | <chem>O=C(Nc1ccc(cc1)C)C(=Cc1ccc(cc1)C#N)C#N</chem>             |
| 688 | <chem>O(C(=O)c1cccc1)c1ccc(cc1)-c1nc2n(c1)C=CC=C2</chem>        |
| 689 | <chem>O1c2cc(NC=C(/C#N)\c3ccc(cc3)C)c(OC)cc2OC1</chem>          |
| 690 | <chem>s1c(ccc1C)C=NNC(=O)Cn1cccc1C</chem>                       |
| 691 | <chem>s1cccc1-c1n(C(C)C)c(cc1)CCC(=O)[O-]</chem>                |
| 692 | <chem>O1c2cc(C=NNC(=O)c3cccnc3)c([N+](=O)[O-])cc2OC1</chem>     |
| 693 | <chem>S(CC(=O)Nc1cc(F)ccc1)c1cccc1</chem>                       |
| 694 | <chem>Clc1cccc(F)c1Cn1c2c(nc1C(O)C)cccc2</chem>                 |
| 695 | <chem>Clc1cc(ccc1C(=O)N1CCN(CC1)c1cc(Cl)ccc1)C</chem>           |
| 696 | <chem>O=C1CC(Cc2nc(nc2)NC(=O)Nc1cccc1)(C)C</chem>               |
| 697 | <chem>Clc1cc(C(=O)Nc2cccc2C)c(O)cc1</chem>                      |
| 698 | <chem>Brc1ccc(OCC(=O)N2CCc3c2cccc3)cc1C</chem>                  |
| 699 | <chem>Clc1ccc(Cl)cc1C(=O)Nc1cccc1C(F)(F)F</chem>                |
| 700 | <chem>S(=O)([O-])(=Nc1cc(ccc1)C(=O)C)c1cc(ccc1OC)C</chem>       |
| 701 | <chem>Clc1ccc(Cl)cc1C(=O)NC</chem>                              |
| 702 | <chem>O(C)c1c2c(C[C@H]3N(C2)CCc2cc(OC)c(OC)cc23)ccc1OC</chem>   |
| 703 | <chem>Brc1ccc(OCC(=O)N2CCN(CC2)C=O)cc1C</chem>                  |
| 704 | <chem>Brc1c2c(ccc1)c(ccc2)C(=O)[N-]c1nn(nn1)CC</chem>           |
| 705 | <chem>Clc1cc2nc(sc2cc1OC)NC(=O)c1sccc1</chem>                   |
| 706 | <chem>S(NC(=C\c1ccc(OCC(C)C)cc1)\C(=O)[O-])c1nc([nH]n1)C</chem> |
| 707 | <chem>s1c2nc(ncN[C@H]([C@H](CC)C)C(=O)[O-])c2cc1CC)C</chem>     |
| 708 | <chem>Clc1ccc(cc1NC(=O)Cc1ccc(cc1)C)C(F)(F)F</chem>             |
| 709 | <chem>Clc1ccc(Cl)cc1N=C\c1ccc(F)cc1</chem>                      |
| 710 | <chem>Clc1ccc(Cl)cc1-c1onc(n1)-c1ccc(cc1)C</chem>               |
| 711 | <chem>n1c2c(n(CC)c1-c1ccc(cc1)C)cccc2</chem>                    |
| 712 | <chem>S=C(NC[C@H]1OCCC1)N[C@H](C)c1cc(OC)ccc1OC</chem>          |
| 713 | <chem>S=C(Nc1cc(OC)c(OC)cc1)NCCc1ccc(F)cc1</chem>               |
| 714 | <chem>s1cccc1C=NNC(=O)c1cccc1C</chem>                           |
| 715 | <chem>Fc1cccc1CNC(=O)Nc1cc2OCOc2cc1</chem>                      |
| 716 | <chem>Clc1cccc1OCC(=O)NN=Cc1cc(OC)c(OC)cc1</chem>               |
| 717 | <chem>S=C(NC1C2CC3CC1CC(C2)C3)NC(=O)c1ccc(cc1)C</chem>          |
| 718 | <chem>Oc1ccc(N=C\c2n(ccc2)-c2cc3c(cc2)cccc3)cc1</chem>          |
| 719 | <chem>Brc1ccc(NC(=O)CC2(CCCC2)CC(=O)[O-])cc1</chem>             |
| 720 | <chem>s1ccc(C)c1CNc1cc2OCOc2cc1</chem>                          |

|     |                                                               |
|-----|---------------------------------------------------------------|
| 721 | <chem>O[C@H](C)c1nc2c(n1Cc1ccc(cc1)C(C)C)cccc2</chem>         |
| 722 | <chem>FC(F)(F)[C@]1(O)N(N=C(C1)CC)C(=O)[C@H](O)c1cccc1</chem> |
| 723 | <chem>Fc1c(Oc2cc(O)ccc2)c(F)c(F)nc1N1CCCC1</chem>             |
| 724 | <chem>O=C(Nc1c(cc(cc1)C)C)\C=C\c1cccc1</chem>                 |
| 725 | <chem>O=C(Nc1c2ncccc2ccc1)c1ccc(cc1)C</chem>                  |
| 726 | <chem>n1c2cc(N=C\c3cccc3)ccc2n(c1)C1CCCC1</chem>              |
| 727 | <chem>s1c(nnc1SCC(=O)NCc1ccc(cc1)C)NC(=O)C</chem>             |
| 728 | <chem>S(=O)(=O)(N[C@H](C(=O)NCc1cccc1OC)C)c1ccc1cc1</chem>    |
| 729 | <chem>Fc1cc2c3nenc(N4CC[NH+](CC4)CCO)c3[nH]c2cc1</chem>       |
| 730 | <chem>S=C1NN=C(N1N=Cc1ccc(OC)cc1)c1ncccc1</chem>              |
| 731 | <chem>O(CC(=O)Nc1c(cc(cc1)C)C)c1ccc(cc1)-c1cccc1</chem>       |
| 732 | <chem>Clc1cc(ccc1)C(=O)Nc1ccc(N2CC[NH+](CC2)C)cc1</chem>      |
| 733 | <chem>O=C(Cn1cc(c2c1cccc2)C=O)c1cc([N+](=O)[O-])ccc1</chem>   |
| 734 | <chem>S(C(=Cc1cc(O)c(OC)cc1)C(=O)[O-])c1nc([nH]n1)C</chem>    |
| 735 | <chem>O1[C@H](CN(C[C@H]1C)C(=O)Nc1ccc(cc1)C(OC)C)=O)C</chem>  |
| 736 | <chem>O(CC(=O)NC(C)(C)C)c1ccc(cc1)CNc1nn[nH]n1</chem>         |
| 737 | <chem>Brc1ccc(OCC(=O)Nc2ccc(cc2)CC)cc1C</chem>                |
| 738 | <chem>O1CCOc2c1cc(NC(=O)[C@H](Oc1cccc1)CC)cc2</chem>          |
| 739 | <chem>O[C@H](Cn1c2CCCCc2c2cc(ccc12)C)C[NH2+][C]c1cccc1</chem> |
| 740 | <chem>s1ccc(NC(=O)Nc2cc(OC)c(OC)cc2)c1C(OC)=O</chem>          |
| 741 | <chem>Fc1cccc(F)c1NC(=O)\C=C\c1occc1</chem>                   |
| 742 | <chem>s1c(nnc1SCC(=O)Nc1cc(ccc1F)C)C</chem>                   |
| 743 | <chem>s1ccc(C)c1C=NN1C(=NNC1=S)c1cc(OC)ccc1</chem>            |
| 744 | <chem>o1cccc1NC=C\c(=O)Nc1ccc(cc1)CC</chem>                   |
| 745 | <chem>s1c2C[C@H](CCc2c2c1NC(NC2=O)c1ccc(OC)cc1)C</chem>       |
| 746 | <chem>Brc1ccc(-n2c3CC(CC(=O)c3cc2C)(C)C)cc1</chem>            |
| 747 | <chem>O(C)c1cccc1NCC(=O)NN=Cc1cc2c(cc1)cccc2</chem>           |
| 748 | <chem>S(=O)(=O)(N1[C@H](CCC1=O)C(=O)N)c1ccc(cc1)C</chem>      |
| 749 | <chem>O(Cc1c2c(ccc1)cccc2)c1ccc(cc1OC)C=NNC(=O)N</chem>       |
| 750 | <chem>s1cccc1CC(=O)NN=C(Cc1ccc(OC)cc1)C</chem>                |
| 751 | <chem>S(Cc1ccc(cc1)C#N)c1nnc(n1CC)-c1ccncc1</chem>            |
| 752 | <chem>Clc1ccc(OCC(=O)c2cc3CCCCc3cc2)cc1</chem>                |
| 753 | <chem>s1c2cc(NC(=O)C)ccc2nc1[N-]C(=S)NC(=O)CCC</chem>         |
| 754 | <chem>O=C(NN=C1CCCC1)CNc1cccc1C</chem>                        |
| 755 | <chem>ClC=1C[C@H]2[C@H](CC=1)C(=O)N(c1[nH]nc1)C2=O</chem>     |
| 756 | <chem>O=C([O-])c1cc(N2Cc3cc(C)c(cc3C2)C)ccc1</chem>           |
| 757 | <chem>O(CC(=O)N)c1ccc(cc1)C=NNC(=O)c1cc(N(C)C)ccc1</chem>     |
| 758 | <chem>S1c2n(ncn2)C(=O)[C@H]1CC(=O)Nc1ccc(OC)cc1</chem>        |
| 759 | <chem>O(C(C)C)c1ccc(cc1)C(=O)Nc1ccc(NC(=O)CC)cc1</chem>       |
| 760 | <chem>O(C)c1c(OC)c(OC)ccc1C=CC(=O)Nc1cc(ccc1)C</chem>         |
| 761 | <chem>FC(F)Oc1cccc1NC(=O)c1ccc(cc1)-c1cccc1</chem>            |
| 762 | <chem>Clc1cccc1C=CC(=O)N1CCC(CC1)C(OCC)=O</chem>              |
| 763 | <chem>S([C@H](C(=O)N1CCN(CC1)c1cccc1)C)c1ccc(cc1)C</chem>     |
| 764 | <chem>Clc1cc2c(OC(=O)C=C2)cc1OCc1cc(cc1)C)C</chem>            |
| 765 | <chem>o1c(C)c(cc1C)\C=C(/C#N)\c1cccc1</chem>                  |
| 766 | <chem>s1cccc1C(=NNC(=O)CS1nc2c(n1C)cccc2)C</chem>             |
| 767 | <chem>Clc1cc(N2C(c3cc(OCC)ccc3NC2=O)=C)ccc1</chem>            |
| 768 | <chem>S=C(Nc1ccc(cc1)[C@H](CC)C)[N-]c1cn(nc1C(=O)N)CC</chem>  |
| 769 | <chem>O1c2cc(ccc2OC1)C(=O)Nc1c2c3c(CCc3ccc2)cc1</chem>        |
| 770 | <chem>S(=O)(=O)(N1CCCC1)c1ccc(NC(=O)c2cccc2)cc1</chem>        |
| 771 | <chem>O=C(Nc1cccc1[C@H](CC)C)c1cc(cc1)C)C</chem>              |

|     |                                                                                 |
|-----|---------------------------------------------------------------------------------|
| 772 | <chem>O(C)c1cc2c(nc(nc2C)NC=2NC(=O)[C@@H](N=2)CC(=O)[O-])cc1</chem>             |
| 773 | <chem>O1C(C)=C(C(=O)Nc2ccc(OCC)cc2)C(=CC1=O)C</chem>                            |
| 774 | <chem>Fc1ccc(cc1)-c1n(CC(C)C)c(cc1)CCC(=O)[O-]</chem>                           |
| 775 | <chem>O(C(=O)\C=C\c1cccc1)c1cc(C)c(cc1)C</chem>                                 |
| 776 | <chem>s1nc2c(n1)cccc2NC(=O)c1c(noc1C)-c1cccc1</chem>                            |
| 777 | <chem>O1CCC[C@H]1CNC(=O)c1cc(NC(=O)C(CC)CC)ccc1</chem>                          |
| 778 | <chem>o1c(nc(C#N)c1N1CCCCC1)-c1ccc(cc1)C</chem>                                 |
| 779 | <chem>S=C(NC(=O)C=Cc1ccc(OC)cc1)[N-]c1ccc(cc1O)C</chem>                         |
| 780 | <chem>Clc1cc(O[C@H](C(=O)NCCc2ccccc2)C)ccc1</chem>                              |
| 781 | <chem>S=C(Nc1ccc(N(CC)CC)cc1)NCc1ccc(F)cc1</chem>                               |
| 782 | <chem>O1C=C(CCC1)C[NH+]1CC2=C(NC(=NC2=O)N)CC1</chem>                            |
| 783 | <chem>Clc1sc(en1)CN1CCc2nc(ncc2C1)-c1cccc1</chem>                               |
| 784 | <chem>Brc1nccc([N+](=O)[O-])c1NC(C)C</chem>                                     |
| 785 | <chem>S(C)C1=NC(=O)C2=C(N1)CCN(C2)Cc1cc(C)c(F)nc1</chem>                        |
| 786 | <chem>O=C1N=C(NC2=C1CN(CC2)Cc1[nH]c(en1)C)C</chem>                              |
| 787 | <chem>O(CC)c1cc(ccc1)-c1ncc(cc1)CN1CC2=C(NC(=NC2=O)C2CCCC2)CC1</chem>           |
| 788 | <chem>O(CC(O)C[NH2+])C(C)C)c1ccc(cc1OC)C[NH2+])C(C)(C)C</chem>                  |
| 789 | <chem>O(C)c1cc(ccc1OC)-c1nn(c2ncnc(N)c12)C[C@@H](CO)C</chem>                    |
| 790 | <chem>[NH+]1(CCc2nc(ncc2C1)-c1ccc(N)cc1)Cc1n(ccc1)-c1cc(ccc1)C#N</chem>         |
| 791 | <chem>O=C1N=C(NC2=C1C[NH+](CC2)Cc1cccc(C)c1C)C1=NCCCC1</chem>                   |
| 792 | <chem>Clc1cc(ccc1Cl)Cn1cccc1CN1CC2=C(NC(=NC2=O)C(C)(C)C)CC1</chem>              |
| 793 | <chem>s1c2ncccc2c(-c2cc(F)ccc2)c1S(=O)(=O)c1cc(F)c(OC)cc1</chem>                |
| 794 | <chem>O1c2c(cccc2)C(=O)C(CN2CCc3nc(ncc3C2)C)=C1N</chem>                         |
| 795 | <chem>O=C1N=C(NC2=C1CN(CC2)Cc1enn(c1C)-c1cccc1C)c1ccncc1</chem>                 |
| 796 | <chem>S(C)C1=NC(=O)C2=C(N1)CC[NH+](C2)Cc1c2cc(ccc2nc2c1cccc2)C</chem>           |
| 797 | <chem>O(C)c1n(nc(C)c1CN1CCc2nc(ncc2C1)C1CC1)C</chem>                            |
| 798 | <chem>Clc1ccc(Cl)cc1-c1oc(cc1)CN1CC2=C(NC(=NC2=O)C(C)C)CC1</chem>               |
| 799 | <chem>S(C)C1=NC(=O)C2=C(N1)CCN(C2)Cc1c(n[nH]c1C)C</chem>                        |
| 800 | <chem>FC(F)(F)c1ccc(cc1)-c1nc2CC[NH+](Cc2en1)Cc1c2c([nH]c1)cccc2OCc1ccc1</chem> |
| 801 | <chem>O=C([O-])C[C@H](C[C@H]([NH3+])C(=O)[O-])C(=O)[O-]</chem>                  |
| 802 | <chem>Clc1cc2c(OC(N)=C(CN3CCc4nc(ncc4C3)-c3ccc(cc3)C(F)(F)F)C2=O)cc1</chem>     |
| 803 | <chem>Brc1cc(cnc1)C[NH+]1CC2=C(NC(=S)NC2=O)CC1</chem>                           |
| 804 | <chem>Clc1ccc(cc1)-c1nc(ccc1)CN1CC2=C(NC(=S)N=C2)CC1</chem>                     |
| 805 | <chem>O=C1N=C(NC2=C1CN(CC2)Cc1ccnc1NC(=O)C(C)(C)C)C1CC1</chem>                  |
| 806 | <chem>O(CC1CCN(C1)C(OC(C)(C)C)=O)c1cc(N(C)C)ccc1</chem>                         |
| 807 | <chem>s1cccc1-c1ncc(cc1)C[NH+]1CCc2nc(ncc2C1)-c1ccncc1</chem>                   |
| 808 | <chem>Clc1cccc1-c1ncc(cc1)C[NH+]1CCc2nc(ncc2C1)-c1ccncc1</chem>                 |
| 809 | <chem>Brc1nc(ccc1)CN1CCc2nc(SC)ncc2C1</chem>                                    |
| 810 | <chem>Clc1sc(cc1)CN1CCc2nc(ncc2C1)N</chem>                                      |
| 811 | <chem>Clc1cccc(C)c1C[NH+]1C[C@@H](O)CCCC1</chem>                                |

|     |                                                                                                      |
|-----|------------------------------------------------------------------------------------------------------|
| 812 | <chem>O=C1N=C(NC2=C1C[NH+](CC2)Cc1[nH]c(cc1C)C)CC</chem>                                             |
| 813 | <chem>Clc1ccc(cc1-c1nc(Cl)ncc1)C(=O)C</chem>                                                         |
| 814 | <chem>Fc1ccc(cc1)C(OC(=O)c1ccc([N+](=O)[O-])cc1)C(=O)NCC(OCC)=O</chem>                               |
| 815 | <chem>S(=O)(=O)(C)C1=NC(=O)C2=C(N1)CCN(C2)Cc1n(nc(c1)C)C</chem>                                      |
| 816 | <chem>O1CC(=Cc2c1cccc2)CN1CC2=C(NC(=NC2=O)c2cccc2)CC1</chem>                                         |
| 817 | <chem>Brc1cc(cc(Br)c1)-c1ncc(cc1)CN1CC2=C(NC(=NC2=O)C(C)C)CC1</chem>                                 |
| 818 | <chem>Clc1cc(Cl)ccc1-c1oc(cc1)CN1CC2=C(NC(=NC2=O)c2cccc2)CC1</chem>                                  |
| 819 | <chem>O1CC[NH+](CC1)C1CCN(CC1)c1ccc(nc1)NC1=CC(=CN(C)C1=O)c1cccc(NC(=O)c2ccc(cc2)C(C)(C)C)c1C</chem> |
| 820 | <chem>Brc1c2c(sc1C[NH+]1CCc3nc(ncc3C1)-c1ccncc1)cccc2</chem>                                         |
| 821 | <chem>FC(F)(F)c1ccc(cc1)C1=NC(=O)C2=C(N1)CCN(C2)Cc1nccncc1</chem>                                    |
| 822 | <chem>s1nc(C)c1C[NH+]1CCc2nc(ncc2C1)-c1ccc(cc1)C(F)(F)F</chem>                                       |
| 823 | <chem>Fc1cc(F)ccc1-c1ncc(cc1)C[NH+]1CCc2nc(ncc2C1)N</chem>                                           |
| 824 | <chem>Clc1ncc(Cl)cc1CN1CC2=C(NC(=NC2=O)CCC)CC1</chem>                                                |
| 825 | <chem>Brc1cc2c([nH]cc2CN2CC3=C(NC(=NC3=O)C3=NCCC3)CC2)cc1</chem>                                     |
| 826 | <chem>S(=O)(=O)([O-])c1oc(cc1)CN1CCc2nc(ncc2C1)-c1enccncc1</chem>                                    |
| 827 | <chem>o1c(ccc1C)-c1nn(cc1)CN1CC2=C(NC(=NC2=O)c2ccc(N)cc2)CC1-c1cccc1</chem>                          |
| 828 | <chem>Brc1oc(cc1)CN1CC2=C(NC(=NC2=O)c2sccc2)CC1</chem>                                               |
| 829 | <chem>o1nc(cc1-c1cccc1)CN1CCc2nc(ncc2C1)C1CCCCC1</chem>                                              |
| 830 | <chem>O(C)c1ccc(cc1)-c1nc(ccc1)CN1CC2=C(NC(=NC2=O)C2CC2)CC1</chem>                                   |
| 831 | <chem>Fc1ccc(-n2nc(C)c(c2)C[NH+]2CCc3nc(ncc3C2)C2=NCCCC2)cc1</chem>                                  |
| 832 | <chem>Oc1c2nc(ccc2ccc1)CN1CC2=C(NC(=NC2=O)c2cncnc2)CC1</chem>                                        |
| 833 | <chem>S(c1oc(cc1)CN1CCc2nc(ncc2C1)C(F)(F)F)c1[nH]c2c(n1)cccc2</chem>                                 |
| 834 | <chem>o1c(ccc1C[NH+]1CCc2nc(ncc2C1)-c1ccncc1)C1CC1C</chem>                                           |
| 835 | <chem>s1cc(cc1)-c1oc(cc1)CN1CCc2nc(ncc2C1)C(C)C</chem>                                               |
| 836 | <chem>s1cccc1-c1nc2CC[NH+](Cc2en1)Cc1ccc(nc1)-c1cc(OC)c(OC)cc1</chem>                                |
| 837 | <chem>Clc1nc([nH]c1CN1CC2=C(NC(=NC2=O)c2ccc(Cl)cc2)CC1)CCCC</chem>                                   |
| 838 | <chem>s1c(cnc1N)CN1CC2=C(NC(=NC2=O)c2cncnc2)CC1</chem>                                               |
| 839 | <chem>O1c2cc(OC)ccc2C[C@H](O)C1c1cc([N+](=O)[O-])ccc1</chem>                                         |
| 840 | <chem>ClC=1c2cc(Cl)ccc2OC(=O)C=1CN1CC2=C(NC(=NC2=O)c2ccc(cc2)C(F)(F)F)CC1</chem>                     |
| 841 | <chem>FC(F)(F)c1ccc(cc1)CNC(=O)C(=Cc1cc(O)c(O)cc1)C#N</chem>                                         |
| 842 | <chem>FC(F)(F)c1ccc(cc1)-c1nc2CC[NH+](Cc2en1)Cc1c2cc(OC)ccc2n(c1)C</chem>                            |
| 843 | <chem>OC1CCC[NH+](C1)Cc1ccc(C)c1C</chem>                                                             |
| 844 | <chem>S(c1oc(cc1)CN1CCc2nc(ncc2C1)C1=NCCCC1)c1[nH]c2cc(ccc2n1)C</chem>                               |
| 845 | <chem>s1nc(-c2cccc2)c1C[NH+]1CCc2nc(ncc2C1)C1CCCCC1</chem>                                           |
| 846 | <chem>Clc1cc(C)c(OC2C[NH2+])C2)cc1</chem>                                                            |

|     |                                                                                                                                                                                       |
|-----|---------------------------------------------------------------------------------------------------------------------------------------------------------------------------------------|
| 847 | <chem>Brc1ccc(cc1)-c1oc(cc1)CN1CC2=C(NC(=NC2=O)c2cnnc2)CC1</chem>                                                                                                                     |
| 848 | <chem>S(=O)(=O)(C)C1=NC(=O)C2=C(N1)CCN(C2)Cc1cccn1OCC1CC1</chem>                                                                                                                      |
| 849 | <chem>[NH+]1(CCc2nc(ncc2C1)-c1cncnc1)Cc1[nH]cnc1</chem>                                                                                                                               |
| 850 | <chem>Cle1nc(N2CCN(CC2)C(=O)NC)cen1</chem>                                                                                                                                            |
| 851 | <chem>Cle1nc2c(cc1C[NH+]1CC3=C(NC(=S)NC3=O)CC1)ccc2C</chem>                                                                                                                           |
| 852 | <chem>O=[N+]([O-])c1cc(ccc1NCc1ccc([N+](=O)[O-])cc1)C#N</chem>                                                                                                                        |
| 853 | <chem>Cle1cc(ccc1C)-c1ncc(en1)C(OCC)=O</chem>                                                                                                                                         |
| 854 | <chem>Brc1cc2[nH]cc(c2cc1)C[NH+]1CC2=C(NC(SC)=NC2=O)CC1</chem>                                                                                                                        |
| 855 | <chem>FC(F)(F)c1cccc1C1CCC[NH2+]C1</chem>                                                                                                                                             |
| 856 | <chem>Fc1ccc(OC)cc1CN1C[C@H]([NH3+])CC1</chem>                                                                                                                                        |
| 857 | <chem>S(C)c1[nH]c(c(n1)-c1cc(ncc1)NCC(CC)C)-c1ccc(F)cc1</chem>                                                                                                                        |
| 858 | <chem>Cle1cc(encl)CN1CC2=C(NC(=NC2=O)c2ccc(N)cc2)CC1</chem>                                                                                                                           |
| 859 | <chem>Cle1cncnc1CN1CCc2nc(ncc2C1)C1=NCCCC1</chem>                                                                                                                                     |
| 860 | <chem>O(C)c1ncc(cc1)C[NH+]1CCc2nc(ncc2C1)-c1ccc(N)cc1</chem>                                                                                                                          |
| 861 | <chem>Fc1cc(cnc1OC)CN1CC2=C(NC(=NC2=O)c2occc2)CC1</chem>                                                                                                                              |
| 862 | <chem>Cle1nccc(c1)C(=O)NCc1cccc1C</chem>                                                                                                                                              |
| 863 | <chem>ClC=1c2c(OC(=O)C=1CN1CCc3nc(ncc3C1)-c1sccc1)cccc2</chem>                                                                                                                        |
| 864 | <chem>Fc1cc(ccc1)-c1[nH]ncc1CN1CC2=C(NC(=NC2=O)C(C)C)CC1</chem>                                                                                                                       |
| 865 | <chem>ClC=1c2cc(F)ccc2OCC=1CN1CCc2nc(ncc2C1)-c1cncnc1</chem>                                                                                                                          |
| 866 | <chem>O=[N+]([O-])c1cc([N+](=O)[O-])ccc1NCCC1CC[NH2+]CC1</chem>                                                                                                                       |
| 867 | <chem>S(C)c1nc2CCN(Cc2en1)Cc1ocn1</chem>                                                                                                                                              |
| 868 | <chem>Cle1ncnc2nc([nH]c12)-c1sccc1</chem>                                                                                                                                             |
| 869 | <chem>FC(F)(F)c1ccc(cc1)C1=NC(=O)C2=C(N1)CCN(C2)Cc1cncnc1C</chem>                                                                                                                     |
| 870 | <chem>[NH+]1(CCc2nc(ncc2C1)-c1cncnc1)Cc1cn[nH]c1</chem>                                                                                                                               |
| 871 | <chem>Fc1cc(C)c(cc1)C[NH+]1C[C@H](O)CCC1</chem>                                                                                                                                       |
| 872 | <chem>[Si](C(C)C)(C(C)C)(C(C)C)c1oc(en1)CN1CCc2nc(ncc2C1)N</chem>                                                                                                                     |
| 873 | <chem>O=C1N=C(NC2=C1CN(CC2)Cc1[nH]c(en1)C)N</chem>                                                                                                                                    |
| 874 | <chem>[Si](C\C=C/C\CC\C=C/C[Si](C)(C)C)\C(C)C(C)C</chem>                                                                                                                              |
| 875 | <chem>Fc1cncnc1CN1CCc2nc(ncc2C1)C1=NCCCC1</chem>                                                                                                                                      |
| 876 | <chem>Cle1ncnc(c1)-c1ccc(OC(F)(F)F)cc1</chem>                                                                                                                                         |
| 877 | <chem>s1ccc(C)c1C[NH+]1CC2=C(NC(=NC2=O)C(C)C)CC1</chem>                                                                                                                               |
| 878 | <chem>S(C)C1=NC(=O)C2=C(N1)CC[NH+](C2)Cc1cc(n(c1C)-c1cccc1)C</chem>                                                                                                                   |
| 879 | <chem>Brc1cc(F)c(OC2CN(C2)C(OC(C)(C)C)=O)cc1</chem>                                                                                                                                   |
| 880 | <chem>FC(F)(F)Oc1ccc(cc1)-c1ncc(cc1)C[NH+]1CCc2nc(ncc2C1)-c1cncnc1</chem>                                                                                                             |
| 881 | <chem>Fc1cc(CN2CCc3nc(ncc3C2)C(C)(C)C)c(OC)nc1</chem>                                                                                                                                 |
| 882 | <chem>S(=O)(=O)([O-])c1oc(cc1)CN1CC2=C(NC(=NC2=O)C2CCCC2)CC1</chem>                                                                                                                   |
| 883 | <chem>O(C)c1c2[C@H]3C=4C5=NC(C=4[C@H](c2c(OC)c1)CC3)=Cc1[nH]c(C=c2[nH]c(C=CC3=NC(C=4[C@H]6c7c([C@H](C3=4)CC6)c(OC)ccc7OC)=C5)c3[C@H]4c5c([C@H](CC4)c23)c(OC)ccc5OC)c2[C@H]3c4c</chem> |

|     |                                                                                                   |
|-----|---------------------------------------------------------------------------------------------------|
|     | <chem>([C@H](CC3)c12)c(OC)ccc4OC</chem>                                                           |
| 884 | <chem>S(C)c1nc2CC[NH+](Cc2en1)Cc1[nH]c2c(c1)cccc2</chem>                                          |
| 885 | <chem>Fc1ccc(cc1)-c1c(-c2ccc(F)cc2)c(n(C(C)C)c1CC[C@H](O)C[C@H](O)CC(=O)[O-])C(=O)Nc1cccc1</chem> |
| 886 | <chem>Cle1ccc(cc1)C1=NC(=O)C2=C(N1)CC[NH+](C2)CC=1C2CC(CC=1)C2(C)C</chem>                         |
| 887 | <chem>FC(F)(F)c1cc([N+](=O)[O-])c(NCc2cccc2C)cc1</chem>                                           |
| 888 | <chem>Fc1cc2c(NC(=O)/C/2=C\c2[nH]c(C)c(C(=O)N[C@H]3CCN(N(C)C)C34C(=O)C4=O)c2C)cc1</chem>          |
| 889 | <chem>O=C1Nc2cc(\N=C/3\N=C(N4NC=C(CCCC1)C4=N\3)Nc1cc(ccc1)C(=O)N(CC[NH+](C)C)C)ccc2</chem>        |
| 890 | <chem>O=C([O-])[C@H]1CCC[NH+](C1)Cc1ccc(cc1)C</chem>                                              |
| 891 | <chem>Fc1cc2[nH]cc(c2cc1)C[NH+]1CCc2nc(ncc2C1)-c1cncnc1</chem>                                    |
| 892 | <chem>Cle1nc(ccc1)C(=O)NCc1cc([N+](=O)[O-])ccc1</chem>                                            |
| 893 | <chem>FC(F)(F)c1nc2CC[NH+](Cc2en1)Cc1c2c(n(c1)CC=C)cccc2</chem>                                   |
| 894 | <chem>n1nc2n(nc(c2c1N)-c1cc2c(cc1)cccc2)CC</chem>                                                 |
| 895 | <chem>Cle1ccc(cc1)-c1nc2CC[NH+](Cc2en1)Cc1c2c(ncc1)cccc2</chem>                                   |
| 896 | <chem>Fc1c(cccc1O[C@H]1C[C@H](NC1)C(OC)=O)C(F)(F)F</chem>                                         |
| 897 | <chem>Brc1cncnc1C[NH+]1CCc2nc(ncc2C1)-c1ccc(Cl)cc1</chem>                                         |
| 898 | <chem>O1c2c(OCC1(OC)C=1NCCN=1)cccc2-c1cccc1</chem>                                                |
| 899 | <chem>S(=O)(=O)(C)C1=NC(=O)C2=C(N1)CCN(C2)Cc1c(cc(OC)cc1OC)C</chem>                               |
| 900 | <chem>[NH+]1(CCc2nc(ncc2C1)N)Cc1c2c(n(c1)CC=C)cccc2</chem>                                        |
| 901 | <chem>O(\N=C/1\c2c(CC1[NH3+])cccc2)CCCC1cccc1</chem>                                              |
| 902 | <chem>FC(F)(F)c1ccc(cc1)C1=NC(=O)C2=C(N1)CCN(C2)Cc1nc2c(cc1)cccc2O</chem>                         |
| 903 | <chem>O=C1N=C(NC2=C1CN(CC2)Cc1[nH]c([nH+]c1)C)CC1</chem>                                          |
| 904 | <chem>S(=O)(=O)(C)c1nc2CCN(Cc2en1)CC=1COc2c(C=1)ccc2</chem>                                       |
| 905 | <chem>S=C1NC(=O)C2=C(N1)CC[NH+](C2)Cc1c(n(c1C)C)C</chem>                                          |
| 906 | <chem>O=C1N=C(NC2=C1CN(CC2)Cc1nc2c(n1CCC)cccc2)C(C)C</chem>                                       |
| 907 | <chem>[NH+]1(CCc2nc(ncc2C1)C1CCCC1)Cc1nc2cccc2cc1</chem>                                          |
| 908 | <chem>OC[C@H](C[C@H]([NH3+])C(=O)[O-])C(=O)[O-]</chem>                                            |
| 909 | <chem>s1c(C[NH+]2CCc3nc(ncc3C2)-c2ccc(N)cc2)c(nc1C)-c1cccc1</chem>                                |
| 910 | <chem>s1c(ccc1C[NH+]1CC2=C(NC(=NC2=O)c2cnnc2)CC1)-c1cccc1OC</chem>                                |
| 911 | <chem>O=C1N=C(NC2=C1CN(CC2)Cc1cn(nc1-c1cncnc1)-c1cccc1)N</chem>                                   |
| 912 | <chem>[nH]1c(C)c(nc1CN1CCc2nc(ncc2C1)C1=NCCCC1)C</chem>                                           |
| 913 | <chem>o1cccc1-c1nc2CC[NH+](Cc2en1)Cc1nc[nH]c1C</chem>                                             |
| 914 | <chem>Cle1cccc(C[NH+]2CC(O)CCC2)c1F</chem>                                                        |
| 915 | <chem>[NH+]1(CCc2nc(ncc2C1)N)Cc1cncnc1</chem>                                                     |
| 916 | <chem>Oc1c(CN2CC3=C(NC(=NC3=O)C3CCCC3)CC2)c(nc1C)CO</chem>                                        |
| 917 | <chem>O=[N+]([O-])c1cc(ccc1NCCC1CC[NH2+]CC1)C#N</chem>                                            |
| 918 | <chem>S(CC)c1ccc(cc1)-c1ncc(cc1)CN1CC2=C(NC(=NC2=O)c2cncnc2)CC1</chem>                            |
| 919 | <chem>Cle1ccc(cc1)-c1nc2CC[NH+](Cc2en1)Cc1cn[nH]c1-c1ccc(OC)cc1</chem>                            |
| 920 | <chem>Fc1ncc(cc1)CN1CC2=C(NC(=NC2=O)CCC)CC1</chem>                                                |

|     |                                                                                                                                                                             |
|-----|-----------------------------------------------------------------------------------------------------------------------------------------------------------------------------|
| 921 | FC(F)(F)c1ccc(cc1)-c1nc2CC[NH+](Cc2cn1)Cc1cn(nc1C)C                                                                                                                         |
| 922 | Fc1ccc(cc1)-c1nc(C(=O)N([C@@H](C)c2ccccc2)C)c(n1CC[C@@H](O)C[C@@H](O)CC(=O)[O-])C(C)C                                                                                       |
| 923 | Clc1cc(ccc1Cl)-c1ncc(cc1)C[NH+]1CCc2nc(ncc2C1)CCC                                                                                                                           |
| 924 | S(=O)(=O)(C)C1=NC(=O)C2=C(N1)CCN(C2)Cc1ccc(F)nc1                                                                                                                            |
| 925 | Fc1cccc1[C@H]([C@@H]([NH+](C)C)C1CCCC1)CC[NH+]1CCN(CC1)c1cccc1OC                                                                                                            |
| 926 | S=C1NC(=O)C2=C(N1)CC[NH+](C2)Cc1oc(cc1)C                                                                                                                                    |
| 927 | Clc1ccc(cc1)-c1sc(en1)CN1CCc2nc(ncc2C1)C                                                                                                                                    |
| 928 | s1cccc1-c1nn(cc1C[NH+]1CCc2nc(ncc2C1)C(F)(F)F)-c1cccc1                                                                                                                      |
| 929 | O=C1N=C(NC2=C1CN(CC2)Cc1n[nH]c(c1)C)c1ccc(N)cc1                                                                                                                             |
| 930 | S=C1NC(=O)C2=C(N1)CC[NH+](C2)Cc1n(nc(c1)C)C                                                                                                                                 |
| 931 | [nH]1c2cc(ccc2cc1)-c1nn(c2ncnc(N)c12)C                                                                                                                                      |
| 932 | Fc1ccc(F)cc1N1N=C(C(=O)C)C(C1)(CCCN1[C@H]2C[C@H](OC2)C1)c1cccc1                                                                                                             |
| 933 | FC(F)(F)c1ccc(cc1)-c1nc2CCN(Cc2cn1)Cc1cccnc1OC                                                                                                                              |
| 934 | Clc1cc(cnc1OC)B(O)O                                                                                                                                                         |
| 935 | Fc1ccc(F)cc1C1=NN(C(=O)NCC)C(C1)(CCCCO)c1ccc1                                                                                                                               |
| 936 | Clc1ccc(Cl)cc1-c1oc(cc1)C[NH+]1CCc2nc(ncc2C1)-c1cncnc1                                                                                                                      |
| 937 | Clc1encc(Cl)c1C[NH+]1CCc2nc(ncc2C1)C(C)C                                                                                                                                    |
| 938 | s1cccc1-c1[nH]ncc1C[NH+]1CCc2nc(ncc2C1)-c1sccc1                                                                                                                             |
| 939 | Br1c2c(sc1C[NH+]1CCc3nc(ncc3C1)C1CC1)cccc2                                                                                                                                  |
| 940 | Clc1ncc(cc1)C(=O)NCc1cccnc1                                                                                                                                                 |
| 941 | Clc1n(nc(C)c1C[NH+]1CCc2nc(ncc2C1)-c1sccc1)-c1cccc1                                                                                                                         |
| 942 | S=C1NC2=C(CN(CC2)C2nc3cccc3cc2)C=N1                                                                                                                                         |
| 943 | O=C([O-])[C@H]1CCC[NH+](C1)Cc1cc([N+](=O)[O-])ccc1                                                                                                                          |
| 944 | O(C(C)(C)C)C(=O)Nc1nc(ccc1)C(O)c1cccc1                                                                                                                                      |
| 945 | Clc1cc(ccc1OC)-c1oc(cc1)CN1CC2=C(NC(=NC2=O)C2CCCC2)CC1                                                                                                                      |
| 946 | Clc1nc2cc(ccc2cc1C[NH+]1CC2=C(NC(=NC2=O)CC(C)CC1)C                                                                                                                          |
| 947 | FC(F)(F)c1ccc(cc1)C1=NC(=O)C2=C(N1)CCN(C2)Cc1cnn(CC)c1C                                                                                                                     |
| 948 | Br1cc(sc1)CN1CCc2nc(ncc2C1)-c1occc1                                                                                                                                         |
| 949 | Clc1nc(ncc1C(C)C)C(C)C                                                                                                                                                      |
| 950 | Clc1nc(ccn1)-c1ccc(cc1)C(C)(C)C                                                                                                                                             |
| 951 | O=C1N=C(NC2=C1CN(CC2)Cc1nc(ccc1)-c1cc([N+](=O)[O-])ccc1)c1cccnc1                                                                                                            |
| 952 | S(CC[C@H](NC(=O)[C@@H](NC(=O)[C@@H](NC(=O)[C@@H](NC(=O)[C@@H]([NH3+])CS)CCC[NH+]=C(N)N)[C@H](CC)C)CCC[NH+]=C(N)N)C(=O)N[C@H](C(=O)NC(C(=O)NCC(=O)N[C@H](C(=O)[O-])CS)C)CO)C |

|     |                                                                                                                                                                                    |
|-----|------------------------------------------------------------------------------------------------------------------------------------------------------------------------------------|
| 953 | o1c(C)c(cc1CN1CCc2nc(ncc2C1)C(C)(C)C)C                                                                                                                                             |
| 954 | Clc1ccc(cc1F)C[NH+]1CC(CCC1)C(=O)[O-]                                                                                                                                              |
| 955 | S(C)c1nc2CC[NH+](Cc2cn1)Cc1[nH]c(cc1C)C                                                                                                                                            |
| 956 | S=C1NC(=O)C2=C(N1)CC[NH+](C2)Cc1ccc(nc1)-c1cccc1C(F)(F)F                                                                                                                           |
| 957 | o1c(ccc1C[NH+]1CCc2nc(ncc2C1)-c1cccnc1)-c1cc([N+](=O)[O-])ccc1                                                                                                                     |
| 958 | FC(F)(F)Oc1cc(ccc1)-c1ncc(cc1)C[NH+]1CCc2nc(ncc2C1)C1=NCCCC1                                                                                                                       |
| 959 | s1cccc1C1=NC(=O)C2=C(N1)CCN(C2)Cc1nc(sc1)C                                                                                                                                         |
| 960 | Clc1cccc(F)c1CN1C[C@H]([NH3+])CC1                                                                                                                                                  |
| 961 | Br1cnc(Cl)nc1Nc1ccc(OC)cc1                                                                                                                                                         |
| 962 | n1c2c(cc(cc2)-c2nn(c3ncnc(N)c23)C(C)C)ccc1N                                                                                                                                        |
| 963 | Br1cc2c(OC(=O)C(CN3CCc4nc(ncc4C3)CCC)=C2Cl)cc1                                                                                                                                     |
| 964 | O(C)c1cc(cnc1)C[NH+]1CCc2nc(ncc2C1)N                                                                                                                                               |
| 965 | O(c1ncccc1CN1CC2=C(NC(=NC2=O)c2cncnc2)CC1)C1CCCC1                                                                                                                                  |
| 966 | Clc1ccc(cc1)-c1nc2CC[NH+](Cc2cn1)Cc1ccc(OC2CCCC2)nc1                                                                                                                               |
| 967 | o1c(ccc1C[NH+]1CC2=C(NC(=NC2=O)c2cccc2)CC1)-c1cccc1                                                                                                                                |
| 968 | O(CC1CC1)c1ncccc1CN1CCc2nc(ncc2C1)-c1ccc(N)cc1                                                                                                                                     |
| 969 | Fc1cccc1[C@H]([C@@H](NC(=O)N(C)C)C1CCCC1)CC[NH+]1CCN(CC1)c1cccc1OC                                                                                                                 |
| 970 | FC(F)(F)c1ccc(cc1)-c1nc2CC[NH+](Cc2cn1)Cc1cnc(c1)C                                                                                                                                 |
| 971 | P(OC[C@H]1O[C@@H](n2c3ncnc(N)c3nc2)[C@H](O)[C@@H]1OC(=O)C1=CCCC\N1=N/C)(OP(OP(O)(=O)[O-])(=O)[O-])(=O)[O-])                                                                        |
| 972 | S(C)C1=NC(=O)C2=C(N1)CCN(C2)Cc1c(noc1C)C                                                                                                                                           |
| 973 | O=C1N=CC=C(NC2nccccc2)C1c1[nH]c2c(n1)c(cc(-n1cnc1)c2)C                                                                                                                             |
| 974 | Br1cc(sc1)CN1CCc2nc(ncc2C1)-c1ccc(N)cc1                                                                                                                                            |
| 975 | Fc1cc([N+](=O)[O-])c2OC=C(CN3CCc4nc(ncc4C3)-c3cncnc3)C(=O)c2c1                                                                                                                     |
| 976 | S(c1oc(cc1)CN1CCc2nc(ncc2C1)-c1occc1)c1[nH]c2cc(ccc2n1)C                                                                                                                           |
| 977 | O1[C@]2(O[C@H](CC(=C2)C)[C@@H](C=C)[C@@H]2O[C@@]3(O[C@H]4[C@H](O[C@H]([C@@H](O)C[C@H](C)[C@H]5O[C@]6(OCCCC6)CC[C@H]5C)C(=C)[C@H]4O)CC3)CC2)C)[C@H](O)CC[C@H]1C[C@@](O)(C(=O)[O-])C |
| 978 | s1c2ncccc2cc1C[NH+]1CC2=C(NC(=NC2=O)c2cccc2)CC1                                                                                                                                    |
| 979 | Clc1cc(ccc1)C=1Nc2c(cc(OC)cc2)C(=O)C=1                                                                                                                                             |
| 980 | Clc1ccc(cc1)-c1sc(en1)C[NH+]1CC2=C(NC(=S)N=C2)CC1                                                                                                                                  |
| 981 | Fc1ccc(cc1)-c1ccc(Oc2cc(C)c(\[NH+]=C\N(CC)C)cc2C)cc1                                                                                                                               |
| 982 | Clc1ncc(cc1)CN1CC2=C(NC(=NC2=O)C(F)(F)F)CC1                                                                                                                                        |
